# Supplementary material for: Pharmacological and non-pharmacological therapeutic strategies in difficult-to-treat rheumatoid arthritis: a systematic literature review informing the EULAR recommendations for the management of difficult-to-treat rheumatoid arthritis
Source: HighWire-hosted journal article supplement (doi:10.1136/rmdopen-2020-001512), 2021-01-01
Supplement: rmdopen-2020-001512supp001_data_supplement.pdf [file rmdopen-2020-001512supp001_data_supplement.pdf]

Supplementary table 1. Summary of studies on therapeutic strategies for RA patients with limited drug options

| 1st Author, publication year                                               | Study design   | Patients (total n) | Disease duration of RA (mean) | Contraindication: adverse events, comorbidities or other (percentage of total population)                                                                                                                                                                                                                | Intervention group Description                                                   | n                                      | Comparator Description           | n                                       | Outcome Description                                                                                                                                                                                                                                                                                                                                                                                                                                                                                                                                                                                                                                      | Time point*1             | Number and percentage of responders in intervention group | Number and percentage of responders in comparator group                                                                                                                                                                                                                      | Mean outcome in intervention group (SD)                                                                                                                                                                                                                                           | Mean outcome in control group (SD)                                                                             | Mean difference (standard error, 95% CI) | p-value                                                                                                                         | Other    | Risk of bias*2                                                                                                                  | Risk of bias of individual studies included in SLR*3 |
|----------------------------------------------------------------------------|----------------|--------------------|-------------------------------|----------------------------------------------------------------------------------------------------------------------------------------------------------------------------------------------------------------------------------------------------------------------------------------------------------|----------------------------------------------------------------------------------|----------------------------------------|----------------------------------|-----------------------------------------|----------------------------------------------------------------------------------------------------------------------------------------------------------------------------------------------------------------------------------------------------------------------------------------------------------------------------------------------------------------------------------------------------------------------------------------------------------------------------------------------------------------------------------------------------------------------------------------------------------------------------------------------------------|--------------------------|-----------------------------------------------------------|------------------------------------------------------------------------------------------------------------------------------------------------------------------------------------------------------------------------------------------------------------------------------|-----------------------------------------------------------------------------------------------------------------------------------------------------------------------------------------------------------------------------------------------------------------------------------|----------------------------------------------------------------------------------------------------------------|------------------------------------------|---------------------------------------------------------------------------------------------------------------------------------|----------|---------------------------------------------------------------------------------------------------------------------------------|------------------------------------------------------|
| CARDIOVASCULAR DISEASE                                                     |                |                    |                               |                                                                                                                                                                                                                                                                                                          |                                                                                  |                                        |                                  |                                         |                                                                                                                                                                                                                                                                                                                                                                                                                                                                                                                                                                                                                                                          |                          |                                                           |                                                                                                                                                                                                                                                                              |                                                                                                                                                                                                                                                                                   |                                                                                                                |                                          |                                                                                                                                 |          |                                                                                                                                 |                                                      |
| Studies comparing patients with vs without comorbidity on treatment effect |                |                    |                               |                                                                                                                                                                                                                                                                                                          |                                                                                  |                                        |                                  |                                         |                                                                                                                                                                                                                                                                                                                                                                                                                                                                                                                                                                                                                                                          |                          |                                                           |                                                                                                                                                                                                                                                                              |                                                                                                                                                                                                                                                                                   |                                                                                                                |                                          |                                                                                                                                 |          |                                                                                                                                 |                                                      |
| Studies regarding efficacy                                                 |                |                    |                               |                                                                                                                                                                                                                                                                                                          |                                                                                  |                                        |                                  |                                         |                                                                                                                                                                                                                                                                                                                                                                                                                                                                                                                                                                                                                                                          |                          |                                                           |                                                                                                                                                                                                                                                                              |                                                                                                                                                                                                                                                                                   |                                                                                                                |                                          |                                                                                                                                 |          |                                                                                                                                 |                                                      |
| Combe, 2019*                                                               | Non-RCT        | 1684               | NR                            | Baricitinib: depression (n=64), osteoporosis (n=113), hepatic disorder (n=222), CV disorder (n=350), pulmonary disorder (n=77), not further explained; Placebo: depression (n=69), osteoporosis (n=134), hepatic disorder (n=202), CV disorder (n=381), pulmonary disorder (n=89), not further explained | Baricitinib (4mg)                                                                | 350<br>453<br>350<br>453<br>350<br>453 | Placebo                          | 381<br>500<br>381<br>500<br>381<br>500  | ACR20 response: with CVD<br>ACR20 response: without CVD<br>ACR50 response: with CVD<br>ACR50 response: without CVD<br>DAS28-hsCRP≤3.2: with CVD<br>DAS28-hsCRP≤3.2: without CVD                                                                                                                                                                                                                                                                                                                                                                                                                                                                          | 12W                      | 68.3%<br>66.9%<br>40.9%<br>41.3%<br>44.9%<br>43.0%        | 40.7%<br>38.0%<br>14.4%<br>14.4%<br>15.7%<br>17.2%                                                                                                                                                                                                                           |                                                                                                                                                                                                                                                                                   |                                                                                                                |                                          |                                                                                                                                 |          | High                                                                                                                            |                                                      |
| Studies regarding safety                                                   |                |                    |                               |                                                                                                                                                                                                                                                                                                          |                                                                                  |                                        |                                  |                                         |                                                                                                                                                                                                                                                                                                                                                                                                                                                                                                                                                                                                                                                          |                          |                                                           |                                                                                                                                                                                                                                                                              |                                                                                                                                                                                                                                                                                   |                                                                                                                |                                          |                                                                                                                                 |          |                                                                                                                                 |                                                      |
| Deodhar, 2016                                                              | RCT            | 210                | 7.8Y                          | DM type 2 13.8% (n=29); Hyperlipidemia 30.0% (n=63)                                                                                                                                                                                                                                                      | Etanercept (50mg q1w, DM type 2: 17; Hyperlipidemia: 33)                         | 106                                    | Placebo                          | 104 (DM type 2: 12; Hyperlipidemia: 30) | Fasting glucose (mg/dL): All patients<br>Fasting glucose (mg/dL): DM type 2<br>Fasting glucose (mg/dL): Hyperlipidemia<br>Hemoglobin A1C%: All patients<br>Hemoglobin A1C%: DM type 2<br>Hemoglobin A1C%: Hyperlipidemia<br>Total cholesterol (mg/dL): All patients<br>Total cholesterol (mg/dL): DM type 2<br>Total cholesterol (mg/dL): Hyperlipidemia<br>HDL (mg/dL): All patients<br>HDL (mg/dL): DM type 2<br>HDL (mg/dL): Hyperlipidemia<br>LDL (mg/dL): All patients<br>LDL (mg/dL): DM type 2<br>LDL (mg/dL): Hyperlipidemia<br>Triglycerides (mg/dL): All patients<br>Triglycerides (mg/dL): DM type 2<br>Triglycerides (mg/dL): Hyperlipidemia | 12W                      |                                                           | 97.3 (26.6)<br>133.1 (47.1)<br>105.9 (29.3)<br>5.6 (0.6)<br>6.7 (0.8)<br>6.0 (0.8)<br>184.8 (37.4)<br>170.0 (33.7)<br>182.6 (44.5)<br>61.6 (18.3)<br>61.9 (19.5)<br>61.4 (19.1)<br>96.9 (33.2)<br>79.3 (31.5)<br>90.3 (39.3)<br>131.8 (69.4)<br>153.8 (71.8)<br>155.0 (67.8) | 95.9 (22.3)<br>127.3 (42.4)<br>104.3 (32.1)<br>5.7 (0.9)<br>7.0 (2.1)<br>5.9 (1.3)<br>190.9 (40.7)<br>205.6 (36.2)<br>190.7 (44.2)<br>60.5 (17.1)<br>54.7 (13.6)<br>56.9 (14.0)<br>103.2 (35.4)<br>112.1 (32.3)<br>102.2 (38.2)<br>139.2 (85.5)<br>221.9 (170.3)<br>167.2 (113.4) | ns<br>ns<br>ns<br>ns<br>ns<br>ns<br>ns<br>ns<br>ns<br>ns<br>ns<br>ns<br>ns<br>ns<br>ns<br>ns<br>ns<br>ns<br>ns |                                          | Greater improvement in patients with CAD than in those without. No changes in the examined markers were observed after placebo. | High     |                                                                                                                                 |                                                      |
| Studies comparing different interventions in patients with comorbidity     |                |                    |                               |                                                                                                                                                                                                                                                                                                          |                                                                                  |                                        |                                  |                                         |                                                                                                                                                                                                                                                                                                                                                                                                                                                                                                                                                                                                                                                          |                          |                                                           |                                                                                                                                                                                                                                                                              |                                                                                                                                                                                                                                                                                   |                                                                                                                |                                          |                                                                                                                                 |          |                                                                                                                                 |                                                      |
| Studies regarding efficacy                                                 |                |                    |                               |                                                                                                                                                                                                                                                                                                          |                                                                                  |                                        |                                  |                                         |                                                                                                                                                                                                                                                                                                                                                                                                                                                                                                                                                                                                                                                          |                          |                                                           |                                                                                                                                                                                                                                                                              |                                                                                                                                                                                                                                                                                   |                                                                                                                |                                          |                                                                                                                                 |          |                                                                                                                                 |                                                      |
| Combe, 2019*                                                               | Non-RCT        | 1684               | NR                            | Baricitinib: depression (n=64), osteoporosis (n=113), hepatic disorder (n=222), CV disorder (n=350), pulmonary disorder (n=77), not further explained; Placebo: depression (n=69), osteoporosis (n=134), hepatic disorder (n=202), CV disorder (n=381), pulmonary disorder (n=89), not further explained | Baricitinib (4mg)                                                                | 350<br>453<br>350<br>453<br>350<br>453 | Placebo                          | 381<br>500<br>381<br>500<br>381<br>500  | ACR20 response: with CVD<br>ACR20 response: without CVD<br>ACR50 response: with CVD<br>ACR50 response: without CVD<br>DAS28-hsCRP≤3.2: with CVD<br>DAS28-hsCRP≤3.2: without CVD                                                                                                                                                                                                                                                                                                                                                                                                                                                                          | 12W                      | 68.3%<br>66.9%<br>40.9%<br>41.3%<br>44.9%<br>43.0%        | 40.7%<br>38.0%<br>14.4%<br>14.4%<br>15.7%<br>17.2%                                                                                                                                                                                                                           |                                                                                                                                                                                                                                                                                   |                                                                                                                |                                          |                                                                                                                                 |          | High                                                                                                                            |                                                      |
| Studies regarding safety                                                   |                |                    |                               |                                                                                                                                                                                                                                                                                                          |                                                                                  |                                        |                                  |                                         |                                                                                                                                                                                                                                                                                                                                                                                                                                                                                                                                                                                                                                                          |                          |                                                           |                                                                                                                                                                                                                                                                              |                                                                                                                                                                                                                                                                                   |                                                                                                                |                                          |                                                                                                                                 |          |                                                                                                                                 |                                                      |
| Hang, 2018                                                                 | RCT            | 374                | 5.4Y                          | Moderate/high risk of CAD 100%                                                                                                                                                                                                                                                                           | Baicalin (500mg once daily, oral)                                                | 166                                    | Placebo                          | 165                                     | EULAR good/moderate response at 12W                                                                                                                                                                                                                                                                                                                                                                                                                                                                                                                                                                                                                      | 12W                      | 71%                                                       | 53%                                                                                                                                                                                                                                                                          |                                                                                                                                                                                                                                                                                   |                                                                                                                |                                          | s                                                                                                                               |          | Moderate                                                                                                                        |                                                      |
| Ruscitti, 2019                                                             | RCT            | 39                 | 1Y, median                    | Type 2 diabetes mellitus                                                                                                                                                                                                                                                                                 | TNF $\alpha$ (adalimumab, certolizumab pegol, etanercept, infliximab, golimumab) | 17                                     | Anakinra (100mg/D, subcutaneous) | 22                                      | Good EULAR response                                                                                                                                                                                                                                                                                                                                                                                                                                                                                                                                                                                                                                      | 6M<br>6M<br>6M           | 62.5%<br>95.0%                                            |                                                                                                                                                                                                                                                                              | 3.58 (1.45)<br>14.93 (9.92)<br>7.89 (9.23)                                                                                                                                                                                                                                        | 2.70 (1.16)<br>7.89 (9.23)                                                                                     |                                          | p=0.030<br>p=0.08<br>p=0.0048                                                                                                   |          | High                                                                                                                            |                                                      |
| Studies regarding safety                                                   |                |                    |                               |                                                                                                                                                                                                                                                                                                          |                                                                                  |                                        |                                  |                                         |                                                                                                                                                                                                                                                                                                                                                                                                                                                                                                                                                                                                                                                          |                          |                                                           |                                                                                                                                                                                                                                                                              |                                                                                                                                                                                                                                                                                   |                                                                                                                |                                          |                                                                                                                                 |          |                                                                                                                                 |                                                      |
| Deodhar, 2017                                                              | RCT            | 210                | 7.8Y                          | DM type 2 13.8% (n=29); Hyperlipidemia 30.0% (n=63)                                                                                                                                                                                                                                                      | Etanercept (50mg q1w, DM type 2: 17; Hyperlipidemia: 33)                         | 106                                    | Placebo                          | 104 (DM type 2: 12; Hyperlipidemia: 30) | Fasting glucose (mg/dL): All patients<br>Fasting glucose (mg/dL): DM type 2<br>Fasting glucose (mg/dL): Hyperlipidemia<br>Hemoglobin A1C%: All patients<br>Hemoglobin A1C%: DM type 2<br>Hemoglobin A1C%: Hyperlipidemia<br>Total cholesterol (mg/dL): All patients<br>Total cholesterol (mg/dL): DM type 2<br>Total cholesterol (mg/dL): Hyperlipidemia<br>HDL (mg/dL): All patients<br>HDL (mg/dL): DM type 2<br>HDL (mg/dL): Hyperlipidemia<br>LDL (mg/dL): All patients<br>LDL (mg/dL): DM type 2<br>LDL (mg/dL): Hyperlipidemia<br>Triglycerides (mg/dL): All patients<br>Triglycerides (mg/dL): DM type 2<br>Triglycerides (mg/dL): Hyperlipidemia | 12W                      |                                                           | 97.3 (26.6)<br>133.1 (47.1)<br>105.9 (29.3)<br>5.6 (0.6)<br>6.7 (0.8)<br>6.0 (0.8)<br>184.8 (37.4)<br>170.0 (33.7)<br>182.6 (44.5)<br>61.6 (18.3)<br>61.9 (19.5)<br>61.4 (19.1)<br>96.9 (33.2)<br>79.3 (31.5)<br>90.3 (39.3)<br>131.8 (69.4)<br>153.8 (71.8)<br>155.0 (67.8) | 95.9 (22.3)<br>127.3 (42.4)<br>104.3 (32.1)<br>5.7 (0.9)<br>7.0 (2.1)<br>5.9 (1.3)<br>190.9 (40.7)<br>205.6 (36.2)<br>190.7 (44.2)<br>60.5 (17.1)<br>54.7 (13.6)<br>56.9 (14.0)<br>103.2 (35.4)<br>112.1 (32.3)<br>102.2 (38.2)<br>139.2 (85.5)<br>221.9 (170.3)<br>167.2 (113.4) | ns<br>ns<br>ns<br>ns<br>ns<br>ns<br>ns<br>ns<br>ns<br>ns<br>ns<br>ns<br>ns<br>ns<br>ns<br>ns<br>ns<br>ns<br>ns |                                          | Greater improvement in patients with CAD than in those without. No changes in the examined markers were observed after placebo. | High     |                                                                                                                                 |                                                      |
| Studies regarding safety                                                   |                |                    |                               |                                                                                                                                                                                                                                                                                                          |                                                                                  |                                        |                                  |                                         |                                                                                                                                                                                                                                                                                                                                                                                                                                                                                                                                                                                                                                                          |                          |                                                           |                                                                                                                                                                                                                                                                              |                                                                                                                                                                                                                                                                                   |                                                                                                                |                                          |                                                                                                                                 |          |                                                                                                                                 |                                                      |
| Hang, 2018                                                                 | RCT            | 374                | 5.4Y                          | Moderate/high risk of CAD 100%                                                                                                                                                                                                                                                                           | Baicalin (500mg once daily, oral)                                                | 166                                    | Placebo                          | 165                                     | Levels of triglycerides<br>Total cholesterol<br>LDL-cholesterol                                                                                                                                                                                                                                                                                                                                                                                                                                                                                                                                                                                          | 12W                      |                                                           |                                                                                                                                                                                                                                                                              | 7.64 (0.65)<br>140.93 (39.45)                                                                                                                                                                                                                                                     | 6.70 (0.67)<br>100.81 (11.11)                                                                                  |                                          | p<0.001<br>p<0.001                                                                                                              |          | Moderate                                                                                                                        |                                                      |
| Studies regarding efficacy                                                 |                |                    |                               |                                                                                                                                                                                                                                                                                                          |                                                                                  |                                        |                                  |                                         |                                                                                                                                                                                                                                                                                                                                                                                                                                                                                                                                                                                                                                                          |                          |                                                           |                                                                                                                                                                                                                                                                              |                                                                                                                                                                                                                                                                                   |                                                                                                                |                                          |                                                                                                                                 |          |                                                                                                                                 |                                                      |
| Genovese, 2019*                                                            | RCT (TARGET)   | 546                | NR                            | Diabetes mellitus (baselinefasting glucose >7 mmol/L or baseline HbA1c >6.5%): 78                                                                                                                                                                                                                        | Sarilumab 200mg q2W + DMARD                                                      | 17                                     | Placebo                          | 20                                      | HbA1c%                                                                                                                                                                                                                                                                                                                                                                                                                                                                                                                                                                                                                                                   | Change from BL until 24W |                                                           |                                                                                                                                                                                                                                                                              |                                                                                                                                                                                                                                                                                   |                                                                                                                |                                          | -0.78                                                                                                                           | p<0.001  | High                                                                                                                            |                                                      |
|                                                                            | RCT (MOBILITY) | 369                | NR                            | Diabetes mellitus (baselinefasting glucose >7 mmol/L or baseline HbA1c >6.5%): 28                                                                                                                                                                                                                        | Sarilumab 200mg q2W + DMARD                                                      | 8                                      | Adalimumab 40mg q2W              | 14                                      | HbA1c%                                                                                                                                                                                                                                                                                                                                                                                                                                                                                                                                                                                                                                                   | Change from BL until 24W |                                                           |                                                                                                                                                                                                                                                                              |                                                                                                                                                                                                                                                                                   |                                                                                                                |                                          | -0.41                                                                                                                           | p=0.0192 | High                                                                                                                            |                                                      |
| Studies regarding safety                                                   |                |                    |                               |                                                                                                                                                                                                                                                                                                          |                                                                                  |                                        |                                  |                                         |                                                                                                                                                                                                                                                                                                                                                                                                                                                                                                                                                                                                                                                          |                          |                                                           |                                                                                                                                                                                                                                                                              |                                                                                                                                                                                                                                                                                   |                                                                                                                |                                          |                                                                                                                                 |          |                                                                                                                                 |                                                      |
| Ikonomidis, 2014                                                           | RCT            | 80                 | 11.8Y                         | Chronic stable CAD 75% (n=60) vs RA patients without CAD 25% (n=20)                                                                                                                                                                                                                                      | Anakinra (1 injection of 100mg, cross-over to placebo after 48h)                 | 80                                     | Placebo                          | 80                                      | Endothelial and coronary aortic function                                                                                                                                                                                                                                                                                                                                                                                                                                                                                                                                                                                                                 |                          |                                                           |                                                                                                                                                                                                                                                                              |                                                                                                                                                                                                                                                                                   |                                                                                                                |                                          |                                                                                                                                 |          | Greater improvement in patients with CAD than in those without. No changes in the examined markers were observed after placebo. | High                                                 |
| Ruscitti, 2019                                                             | RCT            | 39                 | 1Y, median                    | Type 2 diabetes mellitus                                                                                                                                                                                                                                                                                 | TNF $\alpha$ (adalimumab, certolizumab pegol, etanercept, infliximab, golimumab) | 17                                     | Anakinra (100mg/D, subcutaneous) | 22                                      | HbA1c%<br>Fasting plasma glucose                                                                                                                                                                                                                                                                                                                                                                                                                                                                                                                                                                                                                         | 6M<br>6M                 |                                                           |                                                                                                                                                                                                                                                                              | 7.64 (0.65)<br>140.93 (39.45)                                                                                                                                                                                                                                                     | 6.70 (0.67)<br>100.81 (11.11)                                                                                  |                                          | p<0.001<br>p<0.001                                                                                                              |          | High                                                                                                                            |                                                      |

Roodenrijs NMT, *et al.* *RMD Open* 2021; 7:e001512. doi: 10.1136/rmdopen-2020-001512

Roodenrijs NMT, *et al.* *RMD Open* 2021; 7:e001512. doi: 10.1136/rmdopen-2020-001512

|                                                                                                                                                                                                                                                                                                                                                                                                                                                                                                                                                                                                                                                                                                                                                                                                                                                                                                                                                                                                                                                                                                                                                                                                                                                                                                                                                                                                                                                                                                                                                                                                                                                                                                                                                         |                                                                  |                                                                               |      |                               |                                                                                                                                                     |     |                                    |    |                                                                                                                                                                  |                                          |                           |          |      |
|---------------------------------------------------------------------------------------------------------------------------------------------------------------------------------------------------------------------------------------------------------------------------------------------------------------------------------------------------------------------------------------------------------------------------------------------------------------------------------------------------------------------------------------------------------------------------------------------------------------------------------------------------------------------------------------------------------------------------------------------------------------------------------------------------------------------------------------------------------------------------------------------------------------------------------------------------------------------------------------------------------------------------------------------------------------------------------------------------------------------------------------------------------------------------------------------------------------------------------------------------------------------------------------------------------------------------------------------------------------------------------------------------------------------------------------------------------------------------------------------------------------------------------------------------------------------------------------------------------------------------------------------------------------------------------------------------------------------------------------------------------|------------------------------------------------------------------|-------------------------------------------------------------------------------|------|-------------------------------|-----------------------------------------------------------------------------------------------------------------------------------------------------|-----|------------------------------------|----|------------------------------------------------------------------------------------------------------------------------------------------------------------------|------------------------------------------|---------------------------|----------|------|
| Shin, 2017                                                                                                                                                                                                                                                                                                                                                                                                                                                                                                                                                                                                                                                                                                                                                                                                                                                                                                                                                                                                                                                                                                                                                                                                                                                                                                                                                                                                                                                                                                                                                                                                                                                                                                                                              | RCT                                                              | 149                                                                           | 7.7Y | Osteopenia (reduced BMD) 100% | Ibradonate (150mg q4w, oral)                                                                                                                        | 76  | Placebo                            | 73 | Lumbar BMD                                                                                                                                                       | Change from BL until 48W                 | +3.7% (5.1%) -1.9% (4.4%) | p=0.0073 | Low  |
| PREGNANCY/LACTATION                                                                                                                                                                                                                                                                                                                                                                                                                                                                                                                                                                                                                                                                                                                                                                                                                                                                                                                                                                                                                                                                                                                                                                                                                                                                                                                                                                                                                                                                                                                                                                                                                                                                                                                                     |                                                                  |                                                                               |      |                               |                                                                                                                                                     |     |                                    |    |                                                                                                                                                                  |                                          |                           |          |      |
| Studies comparing different interventions in patients with comorbidity                                                                                                                                                                                                                                                                                                                                                                                                                                                                                                                                                                                                                                                                                                                                                                                                                                                                                                                                                                                                                                                                                                                                                                                                                                                                                                                                                                                                                                                                                                                                                                                                                                                                                  |                                                                  |                                                                               |      |                               |                                                                                                                                                     |     |                                    |    |                                                                                                                                                                  |                                          |                           |          |      |
| Studies regarding safety                                                                                                                                                                                                                                                                                                                                                                                                                                                                                                                                                                                                                                                                                                                                                                                                                                                                                                                                                                                                                                                                                                                                                                                                                                                                                                                                                                                                                                                                                                                                                                                                                                                                                                                                |                                                                  |                                                                               |      |                               |                                                                                                                                                     |     |                                    |    |                                                                                                                                                                  |                                          |                           |          |      |
| Clowse, 2016                                                                                                                                                                                                                                                                                                                                                                                                                                                                                                                                                                                                                                                                                                                                                                                                                                                                                                                                                                                                                                                                                                                                                                                                                                                                                                                                                                                                                                                                                                                                                                                                                                                                                                                                            | Non-RCT                                                          | 31                                                                            | NR   | Pregnancy 100%                | Tofacitinib (5mg 2/D)                                                                                                                               | 8   | Tofacitinib (10mg, 2/D)            | 9  | congenital malformation<br>spontaneous abortion<br>healthy newborn<br>medical termination<br>lost to follow-up                                                   | NR<br>1<br>6<br>0<br>0                   | 0<br>1<br>5<br>1<br>2     | High     |      |
|                                                                                                                                                                                                                                                                                                                                                                                                                                                                                                                                                                                                                                                                                                                                                                                                                                                                                                                                                                                                                                                                                                                                                                                                                                                                                                                                                                                                                                                                                                                                                                                                                                                                                                                                                         |                                                                  |                                                                               |      |                               | Tofacitinib (15mg 2/D)                                                                                                                              | 1   | Tofacitinib (20mg/D) + MTX 25mg    | 1  | congenital malformation<br>spontaneous abortion<br>healthy newborn<br>medical termination<br>lost to follow-up                                                   | 0<br>1<br>0<br>0<br>0                    | 0<br>0<br>1<br>0<br>0     |          |      |
|                                                                                                                                                                                                                                                                                                                                                                                                                                                                                                                                                                                                                                                                                                                                                                                                                                                                                                                                                                                                                                                                                                                                                                                                                                                                                                                                                                                                                                                                                                                                                                                                                                                                                                                                                         |                                                                  |                                                                               |      |                               | Tofacitinib (5mg/D) + MTX 2.5mg                                                                                                                     | 1   | NA                                 |    | congenital malformation<br>spontaneous abortion<br>healthy newborn<br>medical termination<br>lost to follow-up                                                   | 0<br>0<br>1<br>0<br>0                    | 0<br>0<br>1<br>0<br>0     |          |      |
|                                                                                                                                                                                                                                                                                                                                                                                                                                                                                                                                                                                                                                                                                                                                                                                                                                                                                                                                                                                                                                                                                                                                                                                                                                                                                                                                                                                                                                                                                                                                                                                                                                                                                                                                                         |                                                                  |                                                                               |      |                               | Tofacitinib (5mg 2/D) + MTX 10mg                                                                                                                    | 1   | Tofacitinib (5mg 2/D) + MTX 17.5mg | 1  | congenital malformation<br>spontaneous abortion                                                                                                                  | 0<br>0                                   | 0<br>0                    |          |      |
| Götestam Skorpén, 2016                                                                                                                                                                                                                                                                                                                                                                                                                                                                                                                                                                                                                                                                                                                                                                                                                                                                                                                                                                                                                                                                                                                                                                                                                                                                                                                                                                                                                                                                                                                                                                                                                                                                                                                                  | SLR (69 RCTs, 250 case series/repors) - EULAR points to consider | NR                                                                            | NR   | Maternal exposure, lactation  | All cs/b/tDMARDs + prednisone                                                                                                                       | NR  | NA                                 | NA | Safe to continue - Maternal exposure                                                                                                                             | 0                                        | 0                         | Moderate |      |
| Points to consider for use of antirheumatic drugs in pregnancy "Grade of recommendation": 1 csDMARDs† proven compatible with pregnancy are hydroxychloroquine, chloroquine, sulfasalazine, azathioprine, ciclosporin, tacrolimus and colchicine. They should be continued in pregnancy for maintenance of remission or treatment of a disease flare. (B); 2 csDMARDs† methotrexate, mycophenolate mofetil and cyclophosphamide are teratogenic and should be withdrawn before pregnancy. (B); 3 Non-selective COX inhibitors and prednisone should be considered for use in pregnancy if needed to control active disease symptoms. NSAIDs should be restricted to the first and second trimesters. (B); 4 In severe, refractory maternal disease during pregnancy methylprednisolone pulses, intravenous immunoglobulin or even second or third trimester use of cyclophosphamide should be considered. (D); 5 csDMARDs†, tsDMARDs‡ and anti-inflammatory drugs with insufficient documentation concerning use in pregnancy should be avoided until further evidence is available. This applies to leflunomide, mepacrine, tofacitinib and selective COX II inhibitors. (B-D); 6 Among bDMARDs‡ continuation of TNF inhibitors during the first part of pregnancy should be considered. Etanercept and certolizumab may be considered for use throughout pregnancy due to low rate of transplacental passage. (B); 7 bDMARDs§ rituximab, anakinra, tocilizumab, abatacept, belimumab and ustekinumab have limited documentation on safe use in pregnancy and should be replaced before conception by other medication. They should be used during pregnancy only when no other pregnancy-compatible drug can effectively control maternal disease. (D) |                                                                  |                                                                               |      |                               |                                                                                                                                                     |     |                                    |    |                                                                                                                                                                  |                                          |                           |          |      |
| Points to consider for use of antirheumatic drugs during lactation "Grade of recommendation": 1csDMARDs† and anti-inflammatory drugs compatible with breast feeding should be considered for continuation during lactation provided the child does not have conditions that contraindicate it. This applies to hydroxychloroquine, chloroquine, sulfasalazine, azathioprine, ciclosporin, tacrolimus, colchicine, prednisone, immunoglobulin, non-selective COX inhibitors and celecoxib. (D) 2csDMARDs‡, tsDMARDs‡ and anti-inflammatory drugs with no or limited data on breast feeding should be avoided in lactating women. This applies to methotrexate, mycophenolate mofetil, cyclophosphamide, leflunomide, tofacitinib and cyclooxygenase II inhibitors other than celecoxib. (D); 3Low transfer to breast milk has been shown for rituximab, adalimumab, etanercept and certolizumab. Continuation of TNF inhibitors should be considered compatible with breast feeding. (D); 4bDMARDs§ with no data on breast feeding such as rituximab, anakinra, belimumab, ustekinumab, tocilizumab and abatacept should be avoided during lactation if other therapy is available to control the disease. Based on pharmacological properties of bDMARDs§, lactation should not be discouraged when using these agents, if no other options are available.                                                                                                                                                                                                                                                                                                                                                                                              |                                                                  |                                                                               |      |                               |                                                                                                                                                     |     |                                    |    |                                                                                                                                                                  |                                          |                           |          |      |
| Hoeltzenbein, 2016                                                                                                                                                                                                                                                                                                                                                                                                                                                                                                                                                                                                                                                                                                                                                                                                                                                                                                                                                                                                                                                                                                                                                                                                                                                                                                                                                                                                                                                                                                                                                                                                                                                                                                                                      | Non-RCT                                                          | 288 (RA 235; JIA 20; Other 7; Unknown 26)                                     | NR   | Pregnancy 100%                | Tocilizumab                                                                                                                                         | 288 | NA                                 | NA | Live births<br>Spontaneous abortions<br>Elective terminations of pregnancy<br>Stillbirth<br>Malformations<br>Rate of preterm birth<br>Adverse pregnancy outcomes | 164<br>70<br>53<br>1<br>11<br>31.2%<br>0 |                           | High     |      |
| Mouyis, 2019                                                                                                                                                                                                                                                                                                                                                                                                                                                                                                                                                                                                                                                                                                                                                                                                                                                                                                                                                                                                                                                                                                                                                                                                                                                                                                                                                                                                                                                                                                                                                                                                                                                                                                                                            | SLR (84 RCTs)                                                    | 611 males with preconcepti onal exposure and outcomes on fertility; 5986 with | NR   | Men trying to conceive        | Cyclophosphamide, TNF i, abatacept, rituximab, azathioprine, cyclosporine A, hydroxychloroquine, leflunomide, methotrexate or mycophenolate mofetil | NR  |                                    |    |                                                                                                                                                                  |                                          |                           | Moderate | High |
| Conclusion: Aside from the known adverse impact of cyclophosphamide and sulfasalazine on spermatogenesis, overall there was no firm evidence of harm to fertility or pregnancy outcomes with paternal exposure to anti-TNF therapies, abatacept, rituximab, azathioprine, cyclosporine A, hydroxychloroquine, leflunomide, methotrexate or mycophenolate mofetil. There was no evidence found pertaining to the effects of male exposure to IVIG, tacrolimus, golimumab, anakinra or belimumabon fertility or pregnancy outcomes.                                                                                                                                                                                                                                                                                                                                                                                                                                                                                                                                                                                                                                                                                                                                                                                                                                                                                                                                                                                                                                                                                                                                                                                                                       |                                                                  |                                                                               |      |                               |                                                                                                                                                     |     |                                    |    |                                                                                                                                                                  |                                          |                           |          |      |

|                   |                                         |                               |    |                                           |                                |    |    |    |                                                         |  |                                                                                                                                                                                                                                                                                                                                                                                                                                                                                                                                                                                                                                                                                                                                                                                                                                                                                                                                                                                                                                                                                                                                                                                                                                                                                                                                                                                                                                                                                                                                                                                    |          |
|-------------------|-----------------------------------------|-------------------------------|----|-------------------------------------------|--------------------------------|----|----|----|---------------------------------------------------------|--|------------------------------------------------------------------------------------------------------------------------------------------------------------------------------------------------------------------------------------------------------------------------------------------------------------------------------------------------------------------------------------------------------------------------------------------------------------------------------------------------------------------------------------------------------------------------------------------------------------------------------------------------------------------------------------------------------------------------------------------------------------------------------------------------------------------------------------------------------------------------------------------------------------------------------------------------------------------------------------------------------------------------------------------------------------------------------------------------------------------------------------------------------------------------------------------------------------------------------------------------------------------------------------------------------------------------------------------------------------------------------------------------------------------------------------------------------------------------------------------------------------------------------------------------------------------------------------|----------|
| Sammaritano, 2020 | SLR (53<br>nRCTs) -<br>ACR<br>guideline | NR<br>(patients<br>with RMDs) | NR | Paternal and maternal exposure, lactation | All cs/b/tsDMARDs + prednisone | NR | NA | NA | Safe to continue - Paternal exposure                    |  | Strongly recommend continuing: Azathioprine/ 6-mercaptopurine, Colchicine, Hydroxychloroquine, Tumor necrosis factor inhibitors (all)<br>Conditionally recommend continuing: Anakinra, Cycloxygenase 2 inhibitors, Cyclosporine, Lefunomide, Methotrexate, Mycophenolate mofetil, Mycophenolic acid, Nonsteroidal anti-inflammatory drugs, Rituximab, Sulfasalazine (semen analysis if delayed conception), Tacrolimus<br>Strongly recommend discontinuing: Cyclophosphamide (discontinue 12 weeks prior to attempted conception)<br>Conditionally recommend discontinuing: Thalidomide (discontinue 4 weeks prior to attempted conception)<br>Unable to make a recommendation due to limited data: Abatacept, Apremilast, Baricitinib, Belimumab, Secukinumab, Tocilizumab, Tofacitinib, Ustekinumab                                                                                                                                                                                                                                                                                                                                                                                                                                                                                                                                                                                                                                                                                                                                                                              | Moderate |
|                   |                                         |                               |    |                                           |                                |    |    |    |                                                         |  |                                                                                                                                                                                                                                                                                                                                                                                                                                                                                                                                                                                                                                                                                                                                                                                                                                                                                                                                                                                                                                                                                                                                                                                                                                                                                                                                                                                                                                                                                                                                                                                    |          |
|                   |                                         |                               |    |                                           |                                |    |    |    |                                                         |  |                                                                                                                                                                                                                                                                                                                                                                                                                                                                                                                                                                                                                                                                                                                                                                                                                                                                                                                                                                                                                                                                                                                                                                                                                                                                                                                                                                                                                                                                                                                                                                                    |          |
|                   |                                         |                               |    |                                           |                                |    |    |    | Safe to continue - Maternal exposure - pre-conception   |  | Strongly recommend continuing: Hydroxychloroquine, Sulfasalazine, Colchicine, Azathioprine/6-mercaptopurine, Certolizumab<br>Conditionally recommend continuing: Prednisone (taper to <20mg/day by adding pregnancy-compatible immunosuppressants), Cyclosporine (monitor blood pressure), Tacrolimus (monitor blood pressure), Nonsteroidal antiinflammatory drugs (cyclooxygenase 2 inhibitors not preferred, discontinue if the woman is having difficulty conceiving), Infliximab (continue through conception), Etanercept (continue through conception), Adalimumab (continue through conception), Golimumab (continue through conception), Rituximab (discontinue at conception), Anakinra (discontinue at conception), Belimumab (discontinue at conception), Abatacept (discontinue at conception), Tocilizumab (discontinue at conception), Secukinumab (discontinue at conception), Ustekinumab (discontinue at conception)<br>Strongly recommend discontinuing: Methotrexate (stop 1-3 months prior to conception), Lefunomide (cholestyramine washout if detectable levels), Mycophenolate mofetil and mycophenolic acid (stop >6 weeks prior to conception to assess disease stability), Cyclophosphamide (stop 3 months prior to conception), Thalidomide (stop 1-3 months prior to conception)<br>Conditionally recommend discontinuing: -<br>Unable to make a recommendation due to limited data: Tofacitinib, Apremilast, Baricitinib (unable to determine due to lack of data; small molecular size suggests transfer across the placenta and into breast milk) |          |
|                   |                                         |                               |    |                                           |                                |    |    |    |                                                         |  |                                                                                                                                                                                                                                                                                                                                                                                                                                                                                                                                                                                                                                                                                                                                                                                                                                                                                                                                                                                                                                                                                                                                                                                                                                                                                                                                                                                                                                                                                                                                                                                    |          |
|                   |                                         |                               |    |                                           |                                |    |    |    |                                                         |  |                                                                                                                                                                                                                                                                                                                                                                                                                                                                                                                                                                                                                                                                                                                                                                                                                                                                                                                                                                                                                                                                                                                                                                                                                                                                                                                                                                                                                                                                                                                                                                                    |          |
|                   |                                         |                               |    |                                           |                                |    |    |    | Safe to continue - Maternal exposure - during pregnancy |  | Strongly recommend continuing: Hydroxychloroquine, Sulfasalazine, Colchicine, Azathioprine/6-mercaptopurine, Certolizumab<br>Conditionally recommend continuing: Prednisone, Cyclosporine, Tacrolimus, Nonsteroidal antiinflammatory drugs (cyclooxygenase 2 inhibitors not preferred), Infliximab, Etanercept, Adalimumab, Golimumab, Rituximab, Cyclophosphamide (Life-/organ-threatening disease in second and third trimesters)<br>Strongly recommend discontinuing: Methotrexate (stop and give folic acid 5mg/day), Lefunomide (stop and give cholestyramine washout), Mycophenolate mofetil and mycophenolic acid, Thalidomide<br>Conditionally recommend discontinuing: Anakinra (discontinue during pregnancy), Belimumab (discontinue during pregnancy), Abatacept (discontinue during pregnancy), Tocilizumab (discontinue during pregnancy), Secukinumab (discontinue during pregnancy), Ustekinumab (discontinue during pregnancy)<br>Unable to make a recommendation due to limited data: Tofacitinib, Apremilast, Baricitinib (unable to determine due to lack of data; small molecular size suggests transfer across the placenta and into breast milk)                                                                                                                                                                                                                                                                                                                                                                                                            |          |
|                   |                                         |                               |    |                                           |                                |    |    |    |                                                         |  |                                                                                                                                                                                                                                                                                                                                                                                                                                                                                                                                                                                                                                                                                                                                                                                                                                                                                                                                                                                                                                                                                                                                                                                                                                                                                                                                                                                                                                                                                                                                                                                    |          |
|                   |                                         |                               |    |                                           |                                |    |    |    |                                                         |  |                                                                                                                                                                                                                                                                                                                                                                                                                                                                                                                                                                                                                                                                                                                                                                                                                                                                                                                                                                                                                                                                                                                                                                                                                                                                                                                                                                                                                                                                                                                                                                                    |          |
|                   |                                         |                               |    |                                           |                                |    |    |    | Safe to continue - Maternal exposure - breastfeeding    |  | Strongly recommend continuing: Hydroxychloroquine, Sulfasalazine, Colchicine, Certolizumab, Infliximab, Etanercept, Adalimumab, Golimumab, Rituximab<br>Conditionally recommend continuing: Azathioprine/6-mercaptopurine (low transfer), Prednisone (after a dose of >20mg, delay breastfeeding for 4 hours), Cyclosporine (low transfer), Tacrolimus (low transfer), Nonsteroidal antiinflammatory drugs (cyclooxygenase 2 inhibitors not preferred, ibuprofen preferred), Anakinra (expect minimal transfer due to large molecular size, but no available data), Belimumab (expect minimal transfer due to large molecular size, but no available data), Abatacept (expect minimal transfer due to large molecular size, but no available data), Tocilizumab (expect minimal transfer due to large molecular size, but no available data), Secukinumab (expect minimal transfer due to large molecular size, but no available data), Ustekinumab (expect minimal transfer due to large molecular size, but no available data)<br>Strongly recommend discontinuing: Lefunomide, Mycophenolate mofetil and mycophenolic acid, Cyclophosphamide, Thalidomide<br>Conditionally recommend discontinuing: Methotrexate (limited data suggest low transfer)<br>Unable to make a recommendation due to limited data: Tofacitinib, Apremilast, Baricitinib (unable to determine due to lack of data; small molecular size suggests transfer across the placenta and into breast                                                                                                          |          |
|                   |                                         |                               |    |                                           |                                |    |    |    |                                                         |  |                                                                                                                                                                                                                                                                                                                                                                                                                                                                                                                                                                                                                                                                                                                                                                                                                                                                                                                                                                                                                                                                                                                                                                                                                                                                                                                                                                                                                                                                                                                                                                                    |          |
|                   |                                         |                               |    |                                           |                                |    |    |    |                                                         |  |                                                                                                                                                                                                                                                                                                                                                                                                                                                                                                                                                                                                                                                                                                                                                                                                                                                                                                                                                                                                                                                                                                                                                                                                                                                                                                                                                                                                                                                                                                                                                                                    |          |

PSYCHOLOGICAL DISEASE

Studies comparing patients with vs without comorbidity on treatment effect

Studies regarding efficacy

Combe, 2019<sup>a</sup>

Non-RCT

1684

NR

Baricitinib: depression (n=64), osteoporosis (n=113), Baricitinib (4mg)

64

Placebo

69

ACR20 response: with depression

12W

59.4%

31.9%

High

|                                                                                                                                                                                                                                                    |              |      |       |                                                                                                                                                                                                                                                                                                          |     |                                                                                            |    |         |                                                                                                   |                          |             |                                               |                                                                                       |      |
|----------------------------------------------------------------------------------------------------------------------------------------------------------------------------------------------------------------------------------------------------|--------------|------|-------|----------------------------------------------------------------------------------------------------------------------------------------------------------------------------------------------------------------------------------------------------------------------------------------------------------|-----|--------------------------------------------------------------------------------------------|----|---------|---------------------------------------------------------------------------------------------------|--------------------------|-------------|-----------------------------------------------|---------------------------------------------------------------------------------------|------|
|                                                                                                                                                                                                                                                    |              |      |       |                                                                                                                                                                                                                                                                                                          |     |                                                                                            |    |         |                                                                                                   |                          |             |                                               |                                                                                       |      |
| hepatic disorder (n=222), CV disorder (n=350), pulmonary disorder (n=77), not further explained; Placebo: depression (n=69), osteoporosis (n=134), hepatic disorder (n=202), CV disorder (n=381), pulmonary disorder (n=89), not further explained |              |      |       |                                                                                                                                                                                                                                                                                                          | 739 |                                                                                            |    | 812     | ACR20 response: without depression                                                                | 68.2%                    | 39.8%       |                                               |                                                                                       |      |
|                                                                                                                                                                                                                                                    |              |      |       |                                                                                                                                                                                                                                                                                                          | 64  |                                                                                            |    | 69      | ACR50 response: with depression                                                                   | 34.4%                    | 8.7%        |                                               |                                                                                       |      |
|                                                                                                                                                                                                                                                    |              |      |       |                                                                                                                                                                                                                                                                                                          | 739 |                                                                                            |    | 812     | ACR50 response: without depression                                                                | 41.7%                    | 14.9%       |                                               |                                                                                       |      |
|                                                                                                                                                                                                                                                    |              |      |       |                                                                                                                                                                                                                                                                                                          | 64  |                                                                                            |    | 69      | DAS28-hsCRP3.2: with depression                                                                   | 31.3%                    | 13.0%       |                                               |                                                                                       |      |
| pulmonary disorder (n=89), not further explained                                                                                                                                                                                                   |              |      |       |                                                                                                                                                                                                                                                                                                          | 739 |                                                                                            |    | 812     | DAS28-hsCRP3.2: without depression                                                                | 44.9%                    | 16.9%       |                                               |                                                                                       |      |
| Studies comparing different interventions in patients with comorbidity                                                                                                                                                                             |              |      |       |                                                                                                                                                                                                                                                                                                          |     |                                                                                            |    |         |                                                                                                   |                          |             |                                               |                                                                                       |      |
| Studies regarding efficacy                                                                                                                                                                                                                         |              |      |       |                                                                                                                                                                                                                                                                                                          |     |                                                                                            |    |         |                                                                                                   |                          |             |                                               |                                                                                       |      |
| Combe, 2019 <sup>a</sup>                                                                                                                                                                                                                           | Non-RCT      | 1684 | NR    | Baricitinib: depression (n=64), osteoporosis (n=113), hepatic disorder (n=222), CV disorder (n=350), pulmonary disorder (n=77), not further explained; Placebo: depression (n=69), osteoporosis (n=134), hepatic disorder (n=202), CV disorder (n=381), pulmonary disorder (n=89), not further explained | 803 | Placebo                                                                                    |    | 881     | ACR20 response: Overall                                                                           | 12W                      | 542 (67.5%) | 345 (39.2%)                                   | High                                                                                  |      |
|                                                                                                                                                                                                                                                    |              |      |       |                                                                                                                                                                                                                                                                                                          |     |                                                                                            |    |         | ACR20 response: Depression                                                                        |                          | 38 (59.4%)  | 22 (31.9%)                                    |                                                                                       |      |
|                                                                                                                                                                                                                                                    |              |      |       |                                                                                                                                                                                                                                                                                                          |     |                                                                                            |    |         | ACR50 response: Overall                                                                           |                          | 330 (41.4%) | 127 (14.4%)                                   |                                                                                       |      |
|                                                                                                                                                                                                                                                    |              |      |       |                                                                                                                                                                                                                                                                                                          |     |                                                                                            |    |         | ACR50 response: Depression                                                                        |                          | 22 (34.4%)  | 9 (13.0%)                                     |                                                                                       |      |
|                                                                                                                                                                                                                                                    |              |      |       |                                                                                                                                                                                                                                                                                                          |     |                                                                                            |    |         | DAS28-hsCRP3.2: Overall                                                                           |                          | 352 (43.8%) | 146 (18.2%)                                   |                                                                                       |      |
|                                                                                                                                                                                                                                                    |              |      |       |                                                                                                                                                                                                                                                                                                          |     |                                                                                            |    |         | DAS28-hsCRP3.2: Depression                                                                        |                          | 20 (31.3%)  | 9 (13.0%)                                     |                                                                                       |      |
| Studies regarding safety                                                                                                                                                                                                                           |              |      |       |                                                                                                                                                                                                                                                                                                          |     |                                                                                            |    |         |                                                                                                   |                          |             |                                               |                                                                                       |      |
| Abramkin, 2017 <sup>a</sup>                                                                                                                                                                                                                        | Non-RCT      | 128  | NR    | Mental disorder (100%)                                                                                                                                                                                                                                                                                   |     | NA                                                                                         |    | NA      | Frequency of major depressive disorder                                                            | Change from BL until 5Y  | +18.2%      | 0.09                                          | High                                                                                  |      |
|                                                                                                                                                                                                                                                    |              |      |       |                                                                                                                                                                                                                                                                                                          |     |                                                                                            |    |         |                                                                                                   |                          | -47.4%      | <0.001                                        |                                                                                       |      |
|                                                                                                                                                                                                                                                    |              |      |       |                                                                                                                                                                                                                                                                                                          |     |                                                                                            |    |         |                                                                                                   |                          | +2.1%       | ns                                            |                                                                                       |      |
|                                                                                                                                                                                                                                                    |              |      |       |                                                                                                                                                                                                                                                                                                          |     |                                                                                            |    |         |                                                                                                   |                          | -66.7%      | 0.03                                          |                                                                                       |      |
|                                                                                                                                                                                                                                                    |              |      |       |                                                                                                                                                                                                                                                                                                          |     |                                                                                            |    |         | Frequency of minor depressive disorder                                                            | Change from BL until 5Y  | +2.2%       | ns                                            |                                                                                       |      |
|                                                                                                                                                                                                                                                    |              |      |       |                                                                                                                                                                                                                                                                                                          |     |                                                                                            |    |         |                                                                                                   |                          | -26.3%      | <0.001                                        |                                                                                       |      |
|                                                                                                                                                                                                                                                    |              |      |       |                                                                                                                                                                                                                                                                                                          |     |                                                                                            |    |         |                                                                                                   |                          | +11.7%      | ns                                            |                                                                                       |      |
|                                                                                                                                                                                                                                                    |              |      |       |                                                                                                                                                                                                                                                                                                          |     |                                                                                            |    |         |                                                                                                   |                          | -16.7%      | ns                                            |                                                                                       |      |
|                                                                                                                                                                                                                                                    |              |      |       |                                                                                                                                                                                                                                                                                                          |     |                                                                                            |    |         | Frequency of anxiety disorder                                                                     | Change from BL until 5Y  | -23.7%      | 0.021                                         |                                                                                       |      |
|                                                                                                                                                                                                                                                    |              |      |       |                                                                                                                                                                                                                                                                                                          |     |                                                                                            |    |         |                                                                                                   |                          | -26.3%      | <0.001                                        |                                                                                       |      |
|                                                                                                                                                                                                                                                    |              |      |       |                                                                                                                                                                                                                                                                                                          |     |                                                                                            |    |         |                                                                                                   |                          | -18.5%      | 0.047                                         |                                                                                       |      |
|                                                                                                                                                                                                                                                    |              |      |       |                                                                                                                                                                                                                                                                                                          |     |                                                                                            |    |         |                                                                                                   |                          | -16.7%      | ns                                            |                                                                                       |      |
|                                                                                                                                                                                                                                                    |              |      |       |                                                                                                                                                                                                                                                                                                          |     |                                                                                            |    |         | Frequency of cognitive disorder                                                                   | Change from BL until 5Y  | +14.0%      | 0.16                                          |                                                                                       |      |
|                                                                                                                                                                                                                                                    |              |      |       |                                                                                                                                                                                                                                                                                                          |     |                                                                                            |    |         |                                                                                                   |                          | -18.9%      | 0.25                                          |                                                                                       |      |
|                                                                                                                                                                                                                                                    |              |      |       |                                                                                                                                                                                                                                                                                                          |     |                                                                                            |    |         |                                                                                                   |                          | +7.2%       | ns                                            |                                                                                       |      |
|                                                                                                                                                                                                                                                    |              |      |       |                                                                                                                                                                                                                                                                                                          |     |                                                                                            |    |         |                                                                                                   |                          | -14.3%      | ns                                            |                                                                                       |      |
| Strand, 2018 <sup>a</sup>                                                                                                                                                                                                                          | RCT (TARGET) | 546  | NR    | Probable major depressive disorder 59.5%; Probable Probable depressed mood and anhedonia 50.4%                                                                                                                                                                                                           |     | Placebo                                                                                    |    | NR      | Domains on SF-36 mental health: Probable major depressive disorder                                | 24W                      |             | p<0.05                                        | High                                                                                  |      |
|                                                                                                                                                                                                                                                    |              |      |       |                                                                                                                                                                                                                                                                                                          |     |                                                                                            |    |         | Domains on SF-36 mental health: Probable depressed mood and anhedonia                             |                          |             | p<0.05                                        | Intervention higher on all domains except for role-emotional and physical functioning |      |
|                                                                                                                                                                                                                                                    |              |      |       |                                                                                                                                                                                                                                                                                                          |     |                                                                                            |    |         | Domains on SF-36 mental health: Probable major depressive disorder                                |                          |             | p<0.05                                        | Intervention higher on all domains except for role-emotional and physical functioning |      |
|                                                                                                                                                                                                                                                    |              |      |       |                                                                                                                                                                                                                                                                                                          |     |                                                                                            |    |         | Domains on SF-36 mental health: Probable depressed mood and anhedonia                             |                          |             | p<0.05                                        | Intervention higher on all domains except for role-emotional and physical functioning |      |
| PULMONARY DISEASE                                                                                                                                                                                                                                  |              |      |       |                                                                                                                                                                                                                                                                                                          |     |                                                                                            |    |         |                                                                                                   |                          |             |                                               |                                                                                       |      |
| Studies comparing patients with vs without comorbidity on treatment effect                                                                                                                                                                         |              |      |       |                                                                                                                                                                                                                                                                                                          |     |                                                                                            |    |         |                                                                                                   |                          |             |                                               |                                                                                       |      |
| Studies regarding efficacy                                                                                                                                                                                                                         |              |      |       |                                                                                                                                                                                                                                                                                                          |     |                                                                                            |    |         |                                                                                                   |                          |             |                                               |                                                                                       |      |
| Combe, 2019 <sup>a</sup>                                                                                                                                                                                                                           | Non-RCT      | 1684 | NR    | Baricitinib: depression (n=64), osteoporosis (n=113), hepatic disorder (n=222), CV disorder (n=350), pulmonary disorder (n=77), not further explained; Placebo: depression (n=69), osteoporosis (n=134), hepatic disorder (n=202), CV disorder (n=381), pulmonary disorder (n=89), not further explained | 77  | Placebo                                                                                    |    | 89      | ACR20 response: with pulmonary disorder                                                           | 12W                      | 66.2%       | 32.6%                                         |                                                                                       |      |
|                                                                                                                                                                                                                                                    |              |      |       |                                                                                                                                                                                                                                                                                                          |     |                                                                                            |    |         | ACR20 response: without pulmonary disorder                                                        |                          | 67.6%       | 39.9%                                         |                                                                                       |      |
|                                                                                                                                                                                                                                                    |              |      |       |                                                                                                                                                                                                                                                                                                          |     |                                                                                            |    |         | ACR50 response: with pulmonary disorder                                                           |                          | 40.3%       | 12.4%                                         |                                                                                       |      |
|                                                                                                                                                                                                                                                    |              |      |       |                                                                                                                                                                                                                                                                                                          |     |                                                                                            |    |         | ACR50 response: without pulmonary disorder                                                        |                          | 41.2%       | 14.6%                                         |                                                                                       |      |
|                                                                                                                                                                                                                                                    |              |      |       |                                                                                                                                                                                                                                                                                                          |     |                                                                                            |    |         | DAS28-hsCRP3.2: with pulmonary disorder                                                           |                          | 37.7%       | 16.9%                                         |                                                                                       |      |
|                                                                                                                                                                                                                                                    |              |      |       |                                                                                                                                                                                                                                                                                                          |     |                                                                                            |    |         | DAS28-hsCRP3.2: without pulmonary disorder                                                        |                          | 44.5%       | 16.5%                                         |                                                                                       |      |
| Studies comparing different interventions in patients with comorbidity                                                                                                                                                                             |              |      |       |                                                                                                                                                                                                                                                                                                          |     |                                                                                            |    |         |                                                                                                   |                          |             |                                               |                                                                                       |      |
| Studies regarding efficacy                                                                                                                                                                                                                         |              |      |       |                                                                                                                                                                                                                                                                                                          |     |                                                                                            |    |         |                                                                                                   |                          |             |                                               |                                                                                       |      |
| Combe, 2019 <sup>a</sup>                                                                                                                                                                                                                           | Non-RCT      | 1684 | NR    | Baricitinib: depression (n=64), osteoporosis (n=113), hepatic disorder (n=222), CV disorder (n=350), pulmonary disorder (n=77), not further explained; Placebo: depression (n=69), osteoporosis (n=134), hepatic disorder (n=202), CV disorder (n=381), pulmonary disorder (n=89), not further explained | 77  | Placebo                                                                                    |    | 89      | ACR20 response: with pulmonary disorder                                                           | 12W                      | 66.2%       | 32.6%                                         | High                                                                                  |      |
|                                                                                                                                                                                                                                                    |              |      |       |                                                                                                                                                                                                                                                                                                          |     |                                                                                            |    |         | ACR20 response: without pulmonary disorder                                                        |                          | 67.6%       | 39.9%                                         |                                                                                       |      |
|                                                                                                                                                                                                                                                    |              |      |       |                                                                                                                                                                                                                                                                                                          |     |                                                                                            |    |         | ACR50 response: with pulmonary disorder                                                           |                          | 40.3%       | 12.4%                                         |                                                                                       |      |
|                                                                                                                                                                                                                                                    |              |      |       |                                                                                                                                                                                                                                                                                                          |     |                                                                                            |    |         | ACR50 response: without pulmonary disorder                                                        |                          | 41.2%       | 14.6%                                         |                                                                                       |      |
|                                                                                                                                                                                                                                                    |              |      |       |                                                                                                                                                                                                                                                                                                          |     |                                                                                            |    |         | DAS28-hsCRP3.2: with pulmonary disorder                                                           |                          | 37.7%       | 16.9%                                         |                                                                                       |      |
|                                                                                                                                                                                                                                                    |              |      |       |                                                                                                                                                                                                                                                                                                          |     |                                                                                            |    |         | DAS28-hsCRP3.2: without pulmonary disorder                                                        |                          | 44.5%       | 16.5%                                         |                                                                                       |      |
| Studies regarding safety                                                                                                                                                                                                                           |              |      |       |                                                                                                                                                                                                                                                                                                          |     |                                                                                            |    |         |                                                                                                   |                          |             |                                               |                                                                                       |      |
| Suissa, 2019                                                                                                                                                                                                                                       | Non-RCT      | 5324 | NR    | COPD 100%                                                                                                                                                                                                                                                                                                |     | Abatacept                                                                                  |    | 3547    | Combination of hospitalized COPD exacerbation, bronchitis and hospitalized pneumonia or influenza |                          |             | HR: 0.87 [0.68-1.12]; OR >1 favours abatacept | High                                                                                  |      |
|                                                                                                                                                                                                                                                    |              |      |       |                                                                                                                                                                                                                                                                                                          |     |                                                                                            |    |         | Hospitalized COPD exacerbation                                                                    |                          |             | HR: 0.60 [0.32-1.11]; OR >1 favours abatacept |                                                                                       |      |
|                                                                                                                                                                                                                                                    |              |      |       |                                                                                                                                                                                                                                                                                                          |     |                                                                                            |    |         | Bronchitis                                                                                        |                          |             | HR: 0.80 [0.56-1.14]; OR >1 favours abatacept |                                                                                       |      |
|                                                                                                                                                                                                                                                    |              |      |       |                                                                                                                                                                                                                                                                                                          |     |                                                                                            |    |         | Hospitalized pneumonia or influenza                                                               |                          |             | HR: 1.39 [0.91-2.13]; OR >1 favours abatacept |                                                                                       |      |
|                                                                                                                                                                                                                                                    |              |      |       |                                                                                                                                                                                                                                                                                                          |     |                                                                                            |    |         | Pneumonia or influenza as outpatient                                                              |                          |             | HR: 1.05 [0.86-1.29]; OR >1 favours abatacept |                                                                                       |      |
| Weinblatt, 2006                                                                                                                                                                                                                                    | RCT          | 1441 | 9.7Y  | COPD: n=54                                                                                                                                                                                                                                                                                               |     | Abatacept (<60 kg: 500mg; 60-100kg: 750 mg; >100kg: 1000 mg; at D1, D15, D29 and then q4W) | 37 | Placebo | Serious respiratory adverse events                                                                |                          | 4 (11%)     | 0                                             |                                                                                       |      |
|                                                                                                                                                                                                                                                    |              |      |       |                                                                                                                                                                                                                                                                                                          |     |                                                                                            |    |         | Adverse events involving the respiratory system                                                   |                          | 43.2%       | 23.5%                                         |                                                                                       |      |
|                                                                                                                                                                                                                                                    |              |      |       |                                                                                                                                                                                                                                                                                                          |     |                                                                                            |    |         | Infections                                                                                        |                          | 59.5%       | 58.8%                                         |                                                                                       |      |
| RENAL DISEASE                                                                                                                                                                                                                                      |              |      |       |                                                                                                                                                                                                                                                                                                          |     |                                                                                            |    |         |                                                                                                   |                          |             |                                               |                                                                                       |      |
| Studies comparing different interventions in patients with comorbidity                                                                                                                                                                             |              |      |       |                                                                                                                                                                                                                                                                                                          |     |                                                                                            |    |         |                                                                                                   |                          |             |                                               |                                                                                       |      |
| Studies regarding efficacy                                                                                                                                                                                                                         |              |      |       |                                                                                                                                                                                                                                                                                                          |     |                                                                                            |    |         |                                                                                                   |                          |             |                                               |                                                                                       |      |
| Mori, 2015 <sup>a</sup>                                                                                                                                                                                                                            | Non-RCT      | 371  | 10.9Y | Renal insufficiency (eGFR <30ml/min) 24.8% (n=92) versus without renal insufficiency 75.2% (n=279)                                                                                                                                                                                                       | 64  | Tocilizumab + MTX                                                                          |    | 28      | CD4I: Renal insufficiency                                                                         | Change from BL until 24W |             | 13.1 (95%CI 10.4-15.8)                        | 13.6 (95%CI 9.5-17.7)                                                                 | High |
|                                                                                                                                                                                                                                                    |              |      |       |                                                                                                                                                                                                                                                                                                          |     |                                                                                            |    |         |                                                                                                   |                          |             |                                               | p=0.25 (between patient groups)                                                       |      |
|                                                                                                                                                                                                                                                    |              |      |       |                                                                                                                                                                                                                                                                                                          |     |                                                                                            |    |         |                                                                                                   |                          |             |                                               | p=0.25 (between patient groups)                                                       |      |
|                                                                                                                                                                                                                                                    |              |      |       |                                                                                                                                                                                                                                                                                                          |     |                                                                                            |    |         |                                                                                                   |                          |             |                                               |                                                                                       |      |
|                                                                                                                                                                                                                                                    |              |      |       |                                                                                                                                                                                                                                                                                                          |     |                                                                                            |    |         |                                                                                                   |                          |             |                                               |                                                                                       |      |

|                          |         |     |       |                                                                                                    |             |     |                   |     |                                              |            |            |
|--------------------------|---------|-----|-------|----------------------------------------------------------------------------------------------------|-------------|-----|-------------------|-----|----------------------------------------------|------------|------------|
| Studies regarding safety |         |     |       |                                                                                                    |             |     |                   |     |                                              |            |            |
| Mori, 2015 <sup>1</sup>  | Non-RCT | 371 | 10.9Y | Renal insufficiency (eGFR <30ml/min) 24.8% (n=92) versus without renal insufficiency 75.2% (n=279) | Tocilizumab | 64  | Tocilizumab + MTX | 28  | Discontinuation: Renal insufficiency         | Within 24W | 4 (6.2%)   |
|                          |         |     |       |                                                                                                    |             | 106 |                   | 173 | Discontinuation: Without renal insufficiency |            | 5 (7.8%)   |
|                          |         |     |       |                                                                                                    |             |     |                   |     |                                              |            | 10 (9.4%)  |
|                          |         |     |       |                                                                                                    |             |     |                   |     |                                              |            | 15 (14.2%) |
|                          |         |     |       |                                                                                                    |             |     |                   |     |                                              |            | High       |

ACR: American College of Rheumatology; AE: adverse event; ALT: alanine transaminase; anti-HBc: hepatitis B core antigen; AST: aspartate transaminase; bDMARD: biologic disease-modifying antirheumatic drug; BL: baseline; BMD: bone mineral density; BMI: body mass index; CAD: coronary artery disease; csDMARD: conventional synthetic disease-modifying antirheumatic drug; CV(D): cardiovascular disease; D: day; DAS28: disease activity score assessing 28 joints; dl: deciliter; DM: diabetes mellitus; DNA: deoxyribonucleic acid; eGFR: estimated glomerular filtration rate; ESR: erythrocyte sedimentation rate; h: hour; HBV: hepatitis B virus; HCV: hepatitis C virus; HDL: high density lipoprotein; hsCRP: high sensitivity C-reactive protein; ILD: interstitial lung disease; IQR: interquartile range; IU: international unit; kg: kilograms; JIA: juvenile idiopathic arthritis; LDL: low density lipoprotein; M: month(s); mg: milligram; ml: milliliter; MTX: methotrexate; n: number; NA: not applicable; NR: not reported; (n-JRCT: (non-randomised controlled trial; ns: not significant; NSAID: non-steroidal anti-inflammatory drug; OR: odds ratio; q, w: once every \_\_\_\_ week(s); RA: rheumatoid arthritis; SD: standard deviation; SF-36: short form general health questionnaire using 36 items; SLR: systematic literature review; TNFi: TNF inhibitor; W: week(s); Y: year(s); \*: abstract or letter.

1. Latest time point during treatment period that was reported; 2. According to Cochrane Collaboration's tool for individual studies: highest risk of bias as found; According to AMSTAR2 tool for SLRs: Low=zero or one non-critical weakness; Moderate=more than one non-critical weakness; High=one critical flaw with or without non-critical weaknesses; Critically high=more than one critical flaw with or without non-critical weaknesses; 3. Only applicable for SLRs: Summary of RoB of individual studies, as assessed in SLR
