# Supplementary material for: Pharmacological and non-pharmacological therapeutic strategies in difficult-to-treat rheumatoid arthritis: a systematic literature review informing the EULAR recommendations for the management of difficult-to-treat rheumatoid arthritis
Source: HighWire-hosted journal article supplement (doi:10.1136/rmdopen-2020-001512), 2021-01-01
Supplement: rmdopen-2020-001512supp002_data_supplement.pdf [file rmdopen-2020-001512supp002_data_supplement.pdf]

Supplementary table 2. Summary of studies on therapeutic strategies for RA patients with true refractory disease

| 1st Author, publication year                    | Study design                                                                                 | Patients (total n) | Failed treatment (Inclusion criteria met)           | Disease activity at baseline (mean (SD)) | Disease duration of RA (mean) | Intervention group Description                                                                                                                                                          | n  | Comparator Description                                         | n  | Outcome Description*1                                                            | Time point*2                      | Number and percentage of responders in intervention group | Number and percentage of responders in control group | OR (95%CI) | Risk ratio (95% CI) | Mean outcome in intervention group (SD) | Mean outcome in control group (SD) | Mean difference (standard error, 95% CI) | p-value                   | Other               | Risk of bias*3 | Risk of bias of individual studies included in SLR*4 |
|-------------------------------------------------|----------------------------------------------------------------------------------------------|--------------------|-----------------------------------------------------|------------------------------------------|-------------------------------|-----------------------------------------------------------------------------------------------------------------------------------------------------------------------------------------|----|----------------------------------------------------------------|----|----------------------------------------------------------------------------------|-----------------------------------|-----------------------------------------------------------|------------------------------------------------------|------------|---------------------|-----------------------------------------|------------------------------------|------------------------------------------|---------------------------|---------------------|----------------|------------------------------------------------------|
| <b>STUDIES IN PATIENTS FAILING ≥2B/TSDMARDS</b> |                                                                                              |                    |                                                     |                                          |                               |                                                                                                                                                                                         |    |                                                                |    |                                                                                  |                                   |                                                           |                                                      |            |                     |                                         |                                    |                                          |                           |                     |                |                                                      |
| <b>Alternative TNFI vs rituximab</b>            |                                                                                              |                    |                                                     |                                          |                               |                                                                                                                                                                                         |    |                                                                |    |                                                                                  |                                   |                                                           |                                                      |            |                     |                                         |                                    |                                          |                           |                     |                |                                                      |
| Blom, 2011                                      | Non-RCT                                                                                      | 154                | Failure of ≥2 TNFis                                 | DA528 5.21                               | 9.9Y                          | Alternative TNFI (Infliximab (n=21, 3mg/kg, loading dose W0, W2, W6, thereafter q8w); Etanercept (n=22, 50mg 1/W or 25mg 2/W, subcutaneous); Adalimumab (n=21, 40mg q2w, subcutaneous)) | 64 | Rituximab (2 times 1000mg with 2W interval, retreatment at 6M) | 90 | DA528                                                                            | 6M                                |                                                           |                                                      |            |                     | 4.54 (1.40)                             | 3.91 (1.25)                        |                                          | p=0.021                   |                     | High           |                                                      |
| Fleckl, 2010                                    | Subanalysis (Subanalysis) RCT                                                                | 69                 | Failure of ≥2 TNFI                                  | NR                                       | NR                            | Alternative TNFI (Adalimumab 40mg subcutaneously every 2 weeks (51%), etanercept subcutaneously 50mg/week (26%), infliximab intravenously starting with 3mg/kg (23%))                   | 12 | Rituximab (2 times 1000mg at days 1 and 15, intravenous)       | 57 | DA528 HAQ, DA528                                                                 | 12M, 12M, Change from BL until 6M |                                                           |                                                      |            |                     | NR                                      | 4.2 (1.4)                          |                                          | p=0.140<br>p=0.0537<br>ns | Better in RTX group | High           |                                                      |
| <b>Alternative TNFI vs mavrilimumab</b>         |                                                                                              |                    |                                                     |                                          |                               |                                                                                                                                                                                         |    |                                                                |    |                                                                                  |                                   |                                                           |                                                      |            |                     |                                         |                                    |                                          |                           |                     |                |                                                      |
| Weinblatt, 2018                                 | Subanalysis RCT (Subanalysis)                                                                | 6                  | Inadequate response to 2 TNFI (excluding golimumab) | NR                                       | NR                            | Mavrilimumab (100mg q2w, subcutaneous)                                                                                                                                                  | 4  | Golimumab (50mg q4w and placebo every 2 other weeks)           | 2  | ACR20 response                                                                   | 24W                               | 2 (66.7%)                                                 | 0 (0%)                                               |            |                     |                                         |                                    |                                          |                           |                     | High           |                                                      |
| <b>Tocilizumab vs placebo</b>                   |                                                                                              |                    |                                                     |                                          |                               |                                                                                                                                                                                         |    |                                                                |    |                                                                                  |                                   |                                                           |                                                      |            |                     |                                         |                                    |                                          |                           |                     |                |                                                      |
| Emery, 2008                                     | Subanalysis RCT (Subanalysis)                                                                | 176                | Failure of 2 TNFis                                  | NR                                       | NR                            | Tocilizumab (8mg/kg, q4w, intravenous)                                                                                                                                                  | 52 | Placebo                                                        | 64 | ACR20 response                                                                   | 24W                               | 26 (50.0%)                                                | 7 (10.9%)                                            |            |                     |                                         |                                    |                                          |                           |                     | High           |                                                      |
|                                                 |                                                                                              |                    |                                                     |                                          |                               | Tocilizumab (4mg/kg, q4w, intravenous)                                                                                                                                                  | 60 | Placebo                                                        | 64 | ACR50 response<br>ACR70 response<br>ACR20 response<br>ACR50 response             | 24W<br>24W<br>24W<br>24W          | 16 (30.8%)<br>8 (15.4%)<br>17 (28.3%)<br>8 (13.3%)        | 1 (1.6%)<br>0 (0.0%)<br>7 (10.9%)<br>1 (1.6%)        |            |                     |                                         |                                    |                                          |                           |                     | High           |                                                      |
|                                                 |                                                                                              | 62                 | Failure of 3 TNFis                                  | NR                                       | NR                            | Tocilizumab (8mg/kg, q4w, intravenous)                                                                                                                                                  | 26 | Placebo                                                        | 18 | ACR20 response<br>ACR50 response<br>ACR70 response                               | 24W<br>24W<br>24W                 | 14 (53.8%)<br>5 (19.2%)<br>2 (7.7%)                       | 0 (0.0%)<br>0 (0.0%)<br>0 (0.0%)                     |            |                     |                                         |                                    |                                          |                           |                     | High           |                                                      |
|                                                 |                                                                                              |                    |                                                     |                                          |                               | Tocilizumab (4mg/kg, q4w, intravenous)                                                                                                                                                  | 18 | Placebo                                                        | 18 | ACR20 response<br>ACR50 response<br>ACR70 response                               | 24W<br>24W<br>24W                 | 4 (22.2%)<br>0 (0.0%)<br>0 (0.0%)                         | 1 (5.6%)<br>0 (0.0%)<br>0 (0.0%)                     |            |                     |                                         |                                    |                                          |                           |                     | High           |                                                      |
| <b>Tofacitinib vs placebo</b>                   |                                                                                              |                    |                                                     |                                          |                               |                                                                                                                                                                                         |    |                                                                |    |                                                                                  |                                   |                                                           |                                                      |            |                     |                                         |                                    |                                          |                           |                     |                |                                                      |
| Burmester, 2013                                 | Subanalysis RCT (Subanalysis)                                                                | 141                | Inadequate response to 2 TNFI                       | NR                                       | NR                            | Tofacitinib (5mg 2/D, oral)                                                                                                                                                             | 37 | Placebo                                                        | 37 | ACR20 response                                                                   | 3M                                | 14 (37.8%)                                                | 4 (10.8%)                                            |            |                     |                                         |                                    |                                          |                           |                     | High           |                                                      |
|                                                 |                                                                                              | 41                 | Inadequate response to ≥3 TNFI                      | NR                                       | NR                            | Tofacitinib (10mg 2/D, oral)                                                                                                                                                            | 30 | Placebo                                                        | 37 | ACR20 response                                                                   | 3M                                | 16 (53.3%)                                                | 4 (10.8%)                                            |            |                     |                                         |                                    |                                          |                           |                     | High           |                                                      |
|                                                 |                                                                                              |                    |                                                     |                                          |                               | Tofacitinib (5mg 2/D, oral)                                                                                                                                                             | 11 | Placebo                                                        | 9  | ACR20 response                                                                   | 3M                                | 4 (36.4%)                                                 | 2 (22.2%)                                            |            |                     |                                         |                                    |                                          |                           |                     | High           |                                                      |
|                                                 |                                                                                              |                    |                                                     |                                          |                               | Tofacitinib (10mg 2/D, oral)                                                                                                                                                            | 12 | Placebo                                                        | 9  | ACR20 response                                                                   | 3M                                | 5 (41.7%)                                                 | 2 (22.2%)                                            |            |                     |                                         |                                    |                                          |                           |                     | High           |                                                      |
| <b>Baricitinib vs placebo</b>                   |                                                                                              |                    |                                                     |                                          |                               |                                                                                                                                                                                         |    |                                                                |    |                                                                                  |                                   |                                                           |                                                      |            |                     |                                         |                                    |                                          |                           |                     |                |                                                      |
| Genovese, 2018a                                 | Subanalysis RCT (Subanalysis of Genovese, 2016 (see also below, failure                      | 211                | Failure of ≥2 TNFI                                  | NR                                       | NR                            | Baricitinib (2mg/D, oral)                                                                                                                                                               | 43 | Placebo                                                        | 69 | ACR20 response<br>CDAI s10                                                       | 12W<br>12W                        | 19 (38%)<br>1 (2%)                                        | 6 (13%)<br>9 (18%)                                   |            |                     |                                         |                                    |                                          |                           |                     | High           |                                                      |
|                                                 |                                                                                              |                    |                                                     |                                          |                               | Baricitinib (4mg/D, oral)                                                                                                                                                               | 54 | Placebo                                                        | 69 | ACR20 response<br>CDAI s10                                                       | 12W<br>12W                        | 24 (53%)<br>1 (2%)                                        | 6 (13%)<br>9 (20%)                                   |            |                     |                                         |                                    |                                          |                           |                     | High           |                                                      |
|                                                 |                                                                                              | 143                | Failure of ≥3 bDMARDs                               | NR                                       | NR                            | Baricitinib (2mg/D, oral)                                                                                                                                                               | 50 | Placebo                                                        | 47 | ACR20 response<br>CDAI s10                                                       | 12W<br>12W                        | 31 (43%)<br>3 (4%)                                        | 17 (25%)<br>16 (22%)                                 |            |                     |                                         |                                    |                                          |                           |                     | High           |                                                      |
|                                                 |                                                                                              |                    |                                                     |                                          |                               | Baricitinib (4mg/D, oral)                                                                                                                                                               | 45 | Placebo                                                        | 47 | ACR20 response<br>CDAI s10                                                       | 12W<br>12W                        | 38 (54%)<br>3 (4%)                                        | 17 (25%)<br>14 (20%)                                 |            |                     |                                         |                                    |                                          |                           |                     | High           |                                                      |
| <b>Upadactinib vs placebo</b>                   |                                                                                              |                    |                                                     |                                          |                               |                                                                                                                                                                                         |    |                                                                |    |                                                                                  |                                   |                                                           |                                                      |            |                     |                                         |                                    |                                          |                           |                     |                |                                                      |
| Kramer, 2016                                    | Subanalysis RCT (Subanalysis (see also below, Weinblatt, 2019a (Subanalysis Genovese, 2018b) | 276                | Failure of ≥2 TNFI                                  | NR                                       | NR                            | Upadactinib (3mg 2/D, oral)                                                                                                                                                             | 16 | Placebo                                                        | 13 | ACR20 response                                                                   | 12W                               | 53%                                                       | 34%                                                  |            |                     |                                         |                                    |                                          |                           |                     | High           |                                                      |
|                                                 |                                                                                              |                    |                                                     |                                          |                               | Upadactinib (6mg 2/D, oral)                                                                                                                                                             | 16 | Placebo                                                        | 13 | ACR20 response                                                                   | 12W                               | 58%                                                       | 34%                                                  |            |                     |                                         |                                    |                                          |                           |                     | High           |                                                      |
|                                                 |                                                                                              |                    |                                                     |                                          |                               | Upadactinib (12mg 2/D, oral)                                                                                                                                                            | 15 | Placebo                                                        | 13 | ACR20 response                                                                   | 12W                               | 67%                                                       | 34%                                                  |            |                     |                                         |                                    |                                          |                           |                     | High           |                                                      |
|                                                 |                                                                                              |                    |                                                     |                                          |                               | Upadactinib (18mg 2/D, oral)                                                                                                                                                            | 17 | Placebo                                                        | 13 | ACR20 response                                                                   | 12W                               | 71%                                                       | 34%                                                  |            |                     |                                         |                                    |                                          |                           |                     | High           |                                                      |
|                                                 |                                                                                              | 137                | Failure of 2 bDMARDs                                |                                          |                               | Upadactinib 15mg/D                                                                                                                                                                      | 40 | Placebo                                                        | 46 | ACR20 response<br>ACR50 response<br>ACR70 response<br>DAS28-CRP ≤3.2<br>CDAI s10 | 12W<br>12W<br>12W<br>12W<br>12W   | 70.0%<br>32.5%<br>5.0%<br>45.0%<br>27.5%                  | 32.6%<br>14.2%<br>8.7%<br>13.0%<br>17.4%             |            |                     |                                         |                                    |                                          |                           |                     | High           |                                                      |
|                                                 |                                                                                              |                    |                                                     |                                          |                               | Upadactinib 30mg/D                                                                                                                                                                      | 51 | Placebo                                                        | 46 | ACR20 response<br>ACR50 response<br>ACR70 response<br>DAS28-CRP ≤3.2<br>CDAI s10 | 12W<br>12W<br>12W<br>12W<br>12W   | 58.8%<br>35.3%<br>21.6%<br>37.3%<br>31.4%                 | 32.0%<br>14.2%<br>8.7%<br>13.0%<br>17.4%             |            |                     |                                         |                                    |                                          |                           |                     | High           |                                                      |
|                                                 |                                                                                              | 125                | Failure of ≥3 bDMARD                                |                                          |                               | Upadactinib 15mg/D                                                                                                                                                                      | 38 | Placebo                                                        | 40 | ACR20 response<br>ACR50 response<br>ACR70 response<br>DAS28-CRP ≤3.2<br>CDAI s10 | 12W<br>12W<br>12W<br>12W<br>12W   | 65.8%<br>39.5%<br>13.2%<br>42.1%<br>34.2%                 | 22.5%<br>7.5%<br>2.5%<br>10.0%<br>7.5%               |            |                     |                                         |                                    |                                          |                           |                     | High           |                                                      |
|                                                 |                                                                                              |                    |                                                     |                                          |                               | Upadactinib 30mg/D                                                                                                                                                                      | 47 | Placebo                                                        | 40 | ACR20 response<br>ACR50 response<br>ACR70 response                               | 12W<br>12W<br>12W                 | 7.9%<br>51.1%<br>29.8%                                    | 2.5%<br>22.5%<br>7.5%                                |            |                     |                                         |                                    |                                          |                           |                     | High           |                                                      |

|                                                                                 |             |      |                      |             |                   |                     |                 |                    |     | DA528-CRP <3.2     | 12W | 40.4%   | 10.0% |                |     | p<0.01 |       |  |                         |                                                                                                                                                                                                                                                                                                                         |          |              |
|---------------------------------------------------------------------------------|-------------|------|----------------------|-------------|-------------------|---------------------|-----------------|--------------------|-----|--------------------|-----|---------|-------|----------------|-----|--------|-------|--|-------------------------|-------------------------------------------------------------------------------------------------------------------------------------------------------------------------------------------------------------------------------------------------------------------------------------------------------------------------|----------|--------------|
|                                                                                 |             |      |                      |             |                   |                     |                 |                    |     | CDAI ≤10           | 12W | 27.7%   | 7.5%  |                |     | p<0.05 |       |  |                         |                                                                                                                                                                                                                                                                                                                         |          |              |
|                                                                                 |             |      |                      |             |                   |                     |                 |                    |     | CDAI ≤2.8          | 12W | 8.5%    | 2.5%  |                |     | ns     |       |  |                         |                                                                                                                                                                                                                                                                                                                         |          |              |
| <b>Figotimb vs placebo</b>                                                      |             |      |                      |             |                   |                     |                 |                    |     |                    |     |         |       |                |     |        |       |  |                         |                                                                                                                                                                                                                                                                                                                         |          |              |
| <b>Genovesi, 2019</b>                                                           | RCT         | 211  | Failure of 2 bDMARDs |             |                   |                     |                 |                    |     | Figotimb (100mg/D) | 33  | Placebo | 36    | ACR20 response | 12W | 57.6%  | 33.3% |  |                         | ns                                                                                                                                                                                                                                                                                                                      | Moderate |              |
|                                                                                 |             |      |                      |             |                   |                     |                 |                    |     | Figotimb (200mg/D) | 37  | Placebo | 36    | ACR20 response | 12W | 70.3%  | 33.3% |  |                         | p<0.01                                                                                                                                                                                                                                                                                                                  |          |              |
|                                                                                 |             |      | Failure of ≥3 bDMARD |             |                   |                     |                 |                    |     | Figotimb (100mg/D) | 34  | Placebo | 34    | ACR20 response | 12W | 58.8%  | 17.6% |  |                         | p<0.001                                                                                                                                                                                                                                                                                                                 |          |              |
|                                                                                 |             |      |                      |             |                   |                     |                 |                    |     | Figotimb (200mg/D) | 37  | Placebo | 34    | ACR20 response | 12W | 70.3%  | 17.6% |  |                         | p<0.001                                                                                                                                                                                                                                                                                                                 |          |              |
| <b>STUDIES IN PATIENTS FAILING ≥18/TSDMARDS (NOT SPECIFICALLY ≥28/TSDMARDS)</b> |             |      |                      |             |                   |                     |                 |                    |     |                    |     |         |       |                |     |        |       |  |                         |                                                                                                                                                                                                                                                                                                                         |          |              |
| <b>8/TSDMARD vs PLACEBO/CSDMARD</b>                                             |             |      |                      |             |                   |                     |                 |                    |     |                    |     |         |       |                |     |        |       |  |                         |                                                                                                                                                                                                                                                                                                                         |          |              |
| <b>8/TSDMARD vs placebo/CSDMARD</b>                                             |             |      |                      |             |                   |                     |                 |                    |     |                    |     |         |       |                |     |        |       |  |                         |                                                                                                                                                                                                                                                                                                                         |          |              |
| <b>Singh, 2017</b>                                                              | SLR: RCTs   | 3364 | Failure of TNFi      | NR          | >2Y               | bDMARD              | 373 (3 studies) | Placebo            | 175 | ACR50 response     |     |         |       |                |     |        |       |  | 4.10 (1.97-8.55)        | Biologic (with or without MTX) or tofacitinib (with MTX) use was associated with clinically meaningful and statistically significant benefits (ACR50, HAQ, remission) compared to placebo or an active comparator (MTX/other traditional DMARDs) among people with RA previously unsuccessfully treated with biologics. | Low      | Low-moderate |
|                                                                                 |             |      |                      |             |                   | bDMARD + MTX        | 955 (3 studies) | MTX/other csDMARDs | 524 | ACR50 response     |     |         |       |                |     |        |       |  | 4.07 (2.76-5.99)        |                                                                                                                                                                                                                                                                                                                         |          |              |
|                                                                                 |             |      |                      |             |                   | Tofacitinib + MTX   | (1 study)       | MTX                |     | ACR50 response     |     |         |       |                |     |        |       |  | 3.24 (1.78-5.89)        |                                                                                                                                                                                                                                                                                                                         |          |              |
| <b>Alternative TNFi vs placebo</b>                                              |             |      |                      |             |                   |                     |                 |                    |     |                    |     |         |       |                |     |        |       |  |                         |                                                                                                                                                                                                                                                                                                                         |          |              |
| <b>Kim, 2014</b>                                                                | SLR: RCTs   | 1524 | Failure of TNFi      | HAQ 1.6-1.9 | 9.6-21.6Y (range) | Golimumab + DMARD   | 153             | Placebo + DMARD    | NR  | ACR20 response     | 6M  |         |       |                |     | 32.1%  | 15.5% |  | 2.577 (1.518-4.496)     | Switching to non-TNF biologics was more effective than cycling TNF's inhibitor in TNF-IR patients; Probability (OR-1): 0.001; OR-1 favours golimumab                                                                                                                                                                    | Moderate | Low-Moderate |
|                                                                                 |             |      |                      |             |                   |                     |                 |                    |     | ACR50 response     | 6M  |         |       |                |     | 15.7%  | 4.2%  |  | 4.254 (1.947-10.550)    | Probability (OR-1): 0.028; OR-1 favours golimumab                                                                                                                                                                                                                                                                       |          |              |
|                                                                                 |             |      |                      |             |                   |                     |                 |                    |     | ACR70 response     | 6M  |         |       |                |     | 5.1%   | 1.3%  |  | 4.211 (1.605-13.460)    | Probability (OR-1): 0.016; OR-1 favours golimumab                                                                                                                                                                                                                                                                       |          |              |
|                                                                                 |             |      |                      |             |                   |                     |                 |                    |     | HAQ                |     |         |       |                |     |        |       |  | Change from BL until 6M | Probability (OR-1): 0.000; OR-1 favours golimumab                                                                                                                                                                                                                                                                       |          |              |
|                                                                                 |             |      |                      |             |                   | Abatacept + DMARD   | 256             | Placebo + DMARD    | NR  | ACR20 response     | 6M  |         |       |                |     | 43.7%  | 15.5% |  | 4.226 (2.606-7.023)     | Probability (OR-1): 0.021; OR-1 favours abatacept                                                                                                                                                                                                                                                                       |          |              |
|                                                                                 |             |      |                      |             |                   |                     |                 |                    |     | ACR50 response     | 6M  |         |       |                |     | 23.1%  | 4.2%  |  | 6.866 (2.900-20.870)    | Probability (OR-1): 0.192; OR-1 favours abatacept                                                                                                                                                                                                                                                                       |          |              |
|                                                                                 |             |      |                      |             |                   |                     |                 |                    |     | ACR70 response     | 6M  |         |       |                |     | 9.9%   | 1.3%  |  | 8.574 (2.312-56.850)    | Probability (OR-1): 0.176; OR-1 favours abatacept                                                                                                                                                                                                                                                                       |          |              |
|                                                                                 |             |      |                      |             |                   |                     |                 |                    |     | HAQ                |     |         |       |                |     |        |       |  | Change from BL until 6M | Probability (OR-1): 0.744; OR-1 favours abatacept                                                                                                                                                                                                                                                                       |          |              |
|                                                                                 |             |      |                      |             |                   | Rituximab + DMARD   | 298             | Placebo + DMARD    | NR  | ACR20 response     | 6M  |         |       |                |     | 47.0%  | 15.5% |  | 4.822 (3.176-7.492)     | Probability (OR-1): 0.039; OR-1 favours rituximab                                                                                                                                                                                                                                                                       |          |              |
|                                                                                 |             |      |                      |             |                   |                     |                 |                    |     | ACR50 response     | 6M  |         |       |                |     | 24.0%  | 4.2%  |  | 7.231 (3.1812-15.490)   | Probability (OR-1): 0.169; OR-1 favours rituximab                                                                                                                                                                                                                                                                       |          |              |
|                                                                                 |             |      |                      |             |                   |                     |                 |                    |     | ACR70 response     | 6M  |         |       |                |     | 17.3%  | 1.3%  |  | 16.220 (4.575-121.800)  | Probability (OR-1): 0.473; OR-1 favours rituximab                                                                                                                                                                                                                                                                       |          |              |
|                                                                                 |             |      |                      |             |                   |                     |                 |                    |     | HAQ                |     |         |       |                |     |        |       |  | Change from BL until 6M | Probability (OR-1): 0.005; OR-1 favours rituximab                                                                                                                                                                                                                                                                       |          |              |
|                                                                                 |             |      |                      |             |                   | Tocilizumab + DMARD | 170             | Placebo + DMARD    | NR  | ACR20 response     | 6M  |         |       |                |     | 62.4%  | 15.5% |  | 9.060 (5.064-17.000)    | Probability (OR-1): 0.939; OR-1 favours tocilizumab                                                                                                                                                                                                                                                                     |          |              |
|                                                                                 |             |      |                      |             |                   |                     |                 |                    |     | ACR50 response     | 6M  |         |       |                |     | 32.2%  | 4.2%  |  | 10.83 (4.731-29.690)    | Probability (OR-1): 0.611; OR-1 favours tocilizumab                                                                                                                                                                                                                                                                     |          |              |
|                                                                                 |             |      |                      |             |                   |                     |                 |                    |     | ACR70 response     | 6M  |         |       |                |     | 14.4%  | 1.3%  |  | 12.900 (3.474-86.120)   | Probability (OR-1): 0.337; OR-1 favours tocilizumab                                                                                                                                                                                                                                                                     |          |              |
|                                                                                 |             |      |                      |             |                   |                     |                 |                    |     | HAQ                |     |         |       |                |     |        |       |  | Change from BL until 6M | Probability (OR-1): 0.204; OR-1 favours tocilizumab                                                                                                                                                                                                                                                                     |          |              |
|                                                                                 |             |      |                      |             |                   | Golimumab + DMARD   | 153             | Abatacept          | 256 | ACR20 response     | 6M  |         |       |                |     | 32.1%  | 43.7% |  | 1.639 (0.786-3.408)     | Probability (OR-1): 0.907; OR-1 favours abatacept                                                                                                                                                                                                                                                                       |          |              |
|                                                                                 |             |      |                      |             |                   |                     |                 |                    |     | ACR50 response     | 6M  |         |       |                |     | 15.7%  | 23.1% |  | 1.623 (0.454-6.247)     | Probability (OR-1): 0.772; OR-1 favours abatacept                                                                                                                                                                                                                                                                       |          |              |
|                                                                                 |             |      |                      |             |                   |                     |                 |                    |     | ACR70 response     | 6M  |         |       |                |     | 5.1%   | 9.9%  |  | 2.048 (0.361-16.470)    | Probability (OR-1): 0.784; OR-1 favours abatacept                                                                                                                                                                                                                                                                       |          |              |
|                                                                                 |             |      |                      |             |                   |                     |                 |                    |     | HAQ                |     |         |       |                |     |        |       |  | Change from BL until 6M | Probability (OR-1): 1.000; OR-1 favours abatacept                                                                                                                                                                                                                                                                       |          |              |
|                                                                                 |             |      |                      |             |                   | Golimumab + DMARD   | 153             | Rituximab          | 298 | ACR20 response     | 6M  |         |       |                |     | 32.1%  | 47.0% |  | 1.871 (0.937-3.725)     | Probability (OR-1): 0.962; OR-1 favours rituximab                                                                                                                                                                                                                                                                       |          |              |
|                                                                                 |             |      |                      |             |                   |                     |                 |                    |     | ACR50 response     | 6M  |         |       |                |     | 15.7%  | 24.0% |  | 1.702 (0.558-5.087)     | Probability (OR-1): 0.830; OR-1 favours rituximab                                                                                                                                                                                                                                                                       |          |              |
|                                                                                 |             |      |                      |             |                   |                     |                 |                    |     | ACR70 response     | 6M  |         |       |                |     | 5.1%   | 17.3% |  | 3.876 (0.685-35.370)    | Probability (OR-1): 0.935; OR-1 favours rituximab                                                                                                                                                                                                                                                                       |          |              |
|                                                                                 |             |      |                      |             |                   |                     |                 |                    |     | HAQ                |     |         |       |                |     |        |       |  | Change from BL until 6M | Probability (OR-1): 0.935; OR-1 favours rituximab                                                                                                                                                                                                                                                                       |          |              |
|                                                                                 |             |      |                      |             |                   | Golimumab + DMARD   | 153             | Tocilizumab        | 170 | ACR20 response     | 6M  |         |       |                |     | 32.1%  | 62.4% |  | 3.520 (1.567-7.946)     | Probability (OR-1): 0.982; OR-1 favours rituximab                                                                                                                                                                                                                                                                       |          |              |
|                                                                                 |             |      |                      |             |                   |                     |                 |                    |     | ACR50 response     | 6M  |         |       |                |     | 15.7%  | 32.2% |  | 2.552 (0.752-9.340)     | Probability (OR-1): 0.933; OR-1 favours tocilizumab                                                                                                                                                                                                                                                                     |          |              |
|                                                                                 |             |      |                      |             |                   |                     |                 |                    |     | ACR70 response     | 6M  |         |       |                |     | 5.1%   | 14.4% |  | 3.107 (0.532-25.490)    | Probability (OR-1): 0.892; OR-1 favours tocilizumab                                                                                                                                                                                                                                                                     |          |              |
|                                                                                 |             |      |                      |             |                   |                     |                 |                    |     | HAQ                |     |         |       |                |     |        |       |  | Change from BL until 6M | Probability (OR-1): 0.993; OR-1 favours tocilizumab                                                                                                                                                                                                                                                                     |          |              |
|                                                                                 |             |      |                      |             |                   |                     |                 |                    |     |                    |     |         |       |                |     |        |       |  |                         | Probability (OR-1): 0.360; OR-1 favours tocilizumab                                                                                                                                                                                                                                                                     |          |              |
| <b>Malettki, 2011</b>                                                           | SLR: RCTs   | NR   | Failure of 1 TNFi    | NR          | NR                | Rituximab           | (1 RCT)         | Placebo            | NR  | ACR20 response     | 6M  |         |       |                |     |        |       |  | 2.85 (2.08-3.91)        | Suggest that rituximab and abatacept are more effective than supportive care; Alternative TNFi some benefit, although uncertainties regarding magnitude of treatment effects and                                                                                                                                        | Moderate | NR           |
|                                                                                 | 5; Non-RCTs | 30   |                      |             |                   |                     |                 |                    |     | ACR70 response     | 6M  |         |       |                |     |        |       |  | 12.14 (2.96-49.86)      |                                                                                                                                                                                                                                                                                                                         |          |              |

| Study                | SLR            | RCTs                    | Population | Intervention       | Comparator | Outcome | Effect Size                                          | 95% CI                  | Notes           | Quality |                      |                         |                         |                                                                                                                                                                                                                                                                                                                          |                        |                         |                         |                         |                      |                      |                      |                     |                     |                     |  |
|----------------------|----------------|-------------------------|------------|--------------------|------------|---------|------------------------------------------------------|-------------------------|-----------------|---------|----------------------|-------------------------|-------------------------|--------------------------------------------------------------------------------------------------------------------------------------------------------------------------------------------------------------------------------------------------------------------------------------------------------------------------|------------------------|-------------------------|-------------------------|-------------------------|----------------------|----------------------|----------------------|---------------------|---------------------|---------------------|--|
| Abatacept vs placebo | Atvernal, 2009 | SLR: RCTs 4; non-RCTs 5 | 9030       | Failure of ≥1 TNFi | NR         | NR      | Adalimumab after failure of infliximab or etanercept | -                       | -               | -       | ACR70 response       | 13%                     |                         | Efficacy, irrespective of mode of action, in reaching ACR70 response is 5-15% for alternative TNFi, rituximab, abatacept and tocilizumab (except in two studies).<br>Switching to non-TNF biologics was more effective than cycling TNFi inhibitor in TNF-IR patients; Probability (OR>1): 0.001; OR>1 favours golimumab | High                   | NR                      |                         |                         |                      |                      |                      |                     |                     |                     |  |
|                      |                |                         |            |                    |            |         | Adalimumab after failure of infliximab               | -                       | -               | -       | ACR70 response       | 33%                     |                         |                                                                                                                                                                                                                                                                                                                          |                        |                         |                         |                         |                      |                      |                      |                     |                     |                     |  |
|                      |                |                         |            |                    |            |         | Rituximab after failure of TNFi                      | -                       | Placebo         | -       | ACR70 response       | 12%                     |                         |                                                                                                                                                                                                                                                                                                                          |                        |                         |                         |                         |                      |                      |                      |                     |                     |                     |  |
|                      |                |                         |            |                    |            |         | Abatacept after failure of TNFi                      | -                       | Placebo         | -       | ACR70 response       | 10.2%                   | 1.5%                    |                                                                                                                                                                                                                                                                                                                          |                        |                         |                         |                         |                      |                      |                      |                     |                     |                     |  |
|                      |                |                         |            |                    |            |         | Tocilizumab after failure of TNFi                    | -                       | Placebo         | -       | ACR70 response       | 12.4%                   |                         |                                                                                                                                                                                                                                                                                                                          |                        |                         |                         |                         |                      |                      |                      |                     |                     |                     |  |
|                      |                |                         |            |                    |            |         | Golimumab + DMARD                                    | 153                     | Placebo + DMARD | NR      | ACR20 response       | 6M                      | 32.1%                   |                                                                                                                                                                                                                                                                                                                          |                        |                         | 15.5%                   | 2.577 (1.518-4.496)     |                      |                      |                      |                     |                     |                     |  |
|                      |                |                         |            |                    |            |         |                                                      |                         |                 |         | ACR50 response       | 6M                      | 15.7%                   |                                                                                                                                                                                                                                                                                                                          |                        |                         | 4.2%                    | 4.254 (1.947-10.550, )  |                      |                      |                      |                     |                     |                     |  |
|                      |                |                         |            |                    |            |         |                                                      |                         |                 |         | ACR70 response       | 6M                      | 5.1%                    |                                                                                                                                                                                                                                                                                                                          |                        |                         | 1.3%                    | 4.211 (1.605-13.460)    |                      |                      |                      |                     |                     |                     |  |
|                      |                |                         |            |                    |            |         |                                                      |                         |                 |         | HAQ                  | Change from BL until 6M |                         |                                                                                                                                                                                                                                                                                                                          |                        |                         |                         | -0.140 (-0.255 -        |                      |                      |                      |                     |                     |                     |  |
|                      |                |                         |            |                    |            |         |                                                      |                         |                 |         | Abatacept + DMARD    | 256                     | Placebo + DMARD         |                                                                                                                                                                                                                                                                                                                          |                        |                         | NR                      | ACR20 response          | 6M                   | 43.7%                | 15.5%                | 4.216 (2.606-7.023) |                     |                     |  |
|                      |                |                         |            |                    |            |         | ACR50 response                                       | 6M                      | 23.1%           | 4.2%    | 6.866 (2.900-20.870) |                         |                         |                                                                                                                                                                                                                                                                                                                          |                        |                         |                         |                         |                      |                      |                      |                     |                     |                     |  |
|                      |                |                         |            |                    |            |         | ACR70 response                                       | 6M                      | 9.9%            | 1.3%    | 8.574 (2.312-56.850) |                         |                         |                                                                                                                                                                                                                                                                                                                          |                        |                         |                         |                         |                      |                      |                      |                     |                     |                     |  |
|                      |                |                         |            |                    |            |         | HAQ                                                  | Change from BL until 6M |                 |         |                      | -0.400 (-0.499 -        |                         |                                                                                                                                                                                                                                                                                                                          |                        |                         |                         |                         |                      |                      |                      |                     |                     |                     |  |
|                      |                |                         |            |                    |            |         | Rituximab + DMARD                                    | 298                     | Placebo + DMARD | NR      | ACR20 response       | 6M                      | 47.0%                   | 15.5%                                                                                                                                                                                                                                                                                                                    | 4.822 (3.176-7.492)    |                         |                         |                         |                      |                      |                      |                     |                     |                     |  |
|                      |                |                         |            |                    |            |         |                                                      |                         |                 |         | ACR50 response       | 6M                      | 24.0%                   | 4.2%                                                                                                                                                                                                                                                                                                                     | 7.231 (3.1812-15.490)  |                         |                         |                         |                      |                      |                      |                     |                     |                     |  |
|                      |                |                         |            |                    |            |         |                                                      |                         |                 |         | ACR70 response       | 6M                      | 17.3%                   | 1.3%                                                                                                                                                                                                                                                                                                                     | 16.220 (4.575-121.800) |                         |                         |                         |                      |                      |                      |                     |                     |                     |  |
|                      |                |                         |            |                    |            |         |                                                      |                         |                 |         | HAQ                  | Change from BL until 6M |                         |                                                                                                                                                                                                                                                                                                                          |                        | -0.300 (-0.397 -        |                         |                         |                      |                      |                      |                     |                     |                     |  |
|                      |                |                         |            |                    |            |         |                                                      |                         |                 |         | Tocilizumab + DMARD  | 170                     | Placebo + DMARD         | NR                                                                                                                                                                                                                                                                                                                       | ACR20 response         | 6M                      | 62.4%                   | 15.5%                   | 9.060 (5.064-17.000) |                      |                      |                     |                     |                     |  |
|                      |                |                         |            |                    |            |         |                                                      |                         |                 |         |                      | ACR50 response          | 6M                      | 32.2%                                                                                                                                                                                                                                                                                                                    | 4.2%                   | 10.83 (4.731-29.690)    |                         |                         |                      |                      |                      |                     |                     |                     |  |
|                      |                |                         |            |                    |            |         |                                                      |                         |                 |         |                      | ACR70 response          | 6M                      | 14.4%                                                                                                                                                                                                                                                                                                                    | 1.3%                   | 12.900 (3.474-86.120)   |                         |                         |                      |                      |                      |                     |                     |                     |  |
|                      |                |                         |            |                    |            |         |                                                      |                         |                 |         |                      | HAQ                     | Change from BL until 6M |                                                                                                                                                                                                                                                                                                                          |                        |                         | -0.340 (-0.453 -        |                         |                      |                      |                      |                     |                     |                     |  |
|                      |                |                         |            |                    |            |         |                                                      |                         |                 |         |                      | Golimumab + DMARD       | 153                     | Abatacept                                                                                                                                                                                                                                                                                                                | 256                    | ACR20 response          | 6M                      | 32.1%                   | 43.7%                | 1.639 (0.786-3.408)  |                      |                     |                     |                     |  |
|                      |                |                         |            |                    |            |         |                                                      |                         |                 |         |                      |                         |                         |                                                                                                                                                                                                                                                                                                                          | ACR50 response         | 6M                      | 15.7%                   | 23.1%                   | 1.623 (0.454-6.247)  |                      |                      |                     |                     |                     |  |
|                      |                |                         |            |                    |            |         |                                                      |                         |                 |         |                      |                         |                         |                                                                                                                                                                                                                                                                                                                          | ACR70 response         | 6M                      | 5.1%                    | 9.9%                    | 2.048 (0.361-16.470) |                      |                      |                     |                     |                     |  |
|                      |                |                         |            |                    |            |         |                                                      |                         |                 |         |                      |                         |                         |                                                                                                                                                                                                                                                                                                                          | HAQ                    | Change from BL until 6M |                         |                         |                      | -0.260 (-0.411 -     |                      |                     |                     |                     |  |
|                      |                |                         |            |                    |            |         |                                                      |                         |                 |         |                      |                         |                         |                                                                                                                                                                                                                                                                                                                          | Golimumab + DMARD      | 153                     | Rituximab               | 298                     | ACR20 response       | 6M                   | 32.1%                | 47.0%               | 1.871 (0.937-3.725) |                     |  |
|                      |                |                         |            |                    |            |         |                                                      |                         |                 |         |                      |                         |                         |                                                                                                                                                                                                                                                                                                                          |                        | ACR50 response          | 6M                      | 15.7%                   | 24.0%                | 1.702 (0.558-5.087)  |                      |                     |                     |                     |  |
|                      |                |                         |            |                    |            |         |                                                      |                         |                 |         |                      |                         |                         |                                                                                                                                                                                                                                                                                                                          |                        | ACR70 response          | 6M                      | 5.1%                    | 17.3%                | 3.876 (0.685-35.370) |                      |                     |                     |                     |  |
|                      |                |                         |            |                    |            |         |                                                      |                         |                 |         |                      |                         |                         |                                                                                                                                                                                                                                                                                                                          |                        | HAQ                     | Change from BL until 6M |                         |                      |                      | -0.160 (-0.310 -     |                     |                     |                     |  |
|                      |                |                         |            |                    |            |         |                                                      |                         |                 |         |                      |                         |                         |                                                                                                                                                                                                                                                                                                                          |                        | Golimumab + DMARD       | 153                     | Tocilizumab             | 170                  | ACR20 response       | 6M                   | 32.1%               | 62.4%               | 3.520 (1.567-7.946) |  |
|                      |                |                         |            |                    |            |         |                                                      |                         |                 |         |                      |                         |                         |                                                                                                                                                                                                                                                                                                                          |                        |                         | ACR50 response          | 6M                      | 15.7%                | 32.2%                | 2.552 (0.752-9.100)  |                     |                     |                     |  |
|                      |                |                         |            |                    |            |         |                                                      |                         |                 |         |                      |                         |                         |                                                                                                                                                                                                                                                                                                                          |                        |                         | ACR70 response          | 6M                      | 5.1%                 | 14.4%                | 3.107 (0.532-25.490) |                     |                     |                     |  |
|                      |                |                         |            |                    |            |         |                                                      |                         |                 |         |                      |                         |                         |                                                                                                                                                                                                                                                                                                                          |                        |                         | HAQ                     | Change from BL until 6M |                      |                      |                      | -0.200 (-0.360 -    |                     |                     |  |

|                             |                          |      |                             |                        |                   |                                                         |                           |                 |                             |                             |            |           |                                                                                                                                                                                                                                                                                                                                                                                                                                                                                                                                                                                                                                                                                            |                                                                                                                                                                                                         |          |              |
|-----------------------------|--------------------------|------|-----------------------------|------------------------|-------------------|---------------------------------------------------------|---------------------------|-----------------|-----------------------------|-----------------------------|------------|-----------|--------------------------------------------------------------------------------------------------------------------------------------------------------------------------------------------------------------------------------------------------------------------------------------------------------------------------------------------------------------------------------------------------------------------------------------------------------------------------------------------------------------------------------------------------------------------------------------------------------------------------------------------------------------------------------------------|---------------------------------------------------------------------------------------------------------------------------------------------------------------------------------------------------------|----------|--------------|
| Lee, 2016                   | SLR: RCTs 4              | 1796 | Inadequate response to TNFI | NR                     | NR                | Tocilizumab 4mg                                         | Tofacitinib 10mg          | ACR20 response  | 24W-6M                      | 1.05 (0.47-2.39)            |            |           | OR-1 favours tocilizumab 4mg; Tocilizumab highest performance regarding early good response based on ACR 20 response, followed by rituximab, abatacept and tofacitinib. OR-1 favours abatacept OR-1 favours rituximab OR-1 favours rituximab OR-1 favours tocilizumab 10mg OR-1 favours rituximab OR-1 favours tocilizumab 4mg OR-1 favours rituximab OR-1 favours abatacept OR-1 favours rituximab OR-1 favours tocilizumab 8mg OR-1 favours tocilizumab 8mg OR-1 favours tocilizumab 8mg OR-1 favours tocilizumab 8mg OR-1 favours tofacitinib 5mg OR-1 favours tofacitinib 10mg OR-1 favours tocilizumab 4mg OR-1 favours abatacept OR-1 favours rituximab OR-1 favours tocilizumab 8mg | Moderate                                                                                                                                                                                                | Low      |              |
|                             |                          |      |                             |                        |                   | Abatacept                                               | Tocilizumab 4mg           | ACR20 response  | 24W-6M                      | 1.06 (0.46-2.28)            |            |           |                                                                                                                                                                                                                                                                                                                                                                                                                                                                                                                                                                                                                                                                                            |                                                                                                                                                                                                         |          |              |
|                             |                          |      |                             |                        |                   | Abatacept                                               | Tofacitinib 10mg          | ACR20 response  | 24W-6M                      | 1.10 (0.54-2.31)            |            |           |                                                                                                                                                                                                                                                                                                                                                                                                                                                                                                                                                                                                                                                                                            |                                                                                                                                                                                                         |          |              |
|                             |                          |      |                             |                        |                   | Rituximab                                               | Abatacept                 | ACR20 response  | 24W-6M                      | 1.14 (0.59-2.15)            |            |           |                                                                                                                                                                                                                                                                                                                                                                                                                                                                                                                                                                                                                                                                                            |                                                                                                                                                                                                         |          |              |
|                             |                          |      |                             |                        |                   | Tofacitinib 10mg                                        | Tofacitinib 5mg           | ACR20 response  | 24W-6M                      | 1.14 (0.71-1.86)            |            |           |                                                                                                                                                                                                                                                                                                                                                                                                                                                                                                                                                                                                                                                                                            |                                                                                                                                                                                                         |          |              |
|                             |                          |      |                             |                        |                   | Rituximab                                               | Tocilizumab 4mg           | ACR20 response  | 24W-6M                      | 1.20 (0.56-2.50)            |            |           |                                                                                                                                                                                                                                                                                                                                                                                                                                                                                                                                                                                                                                                                                            |                                                                                                                                                                                                         |          |              |
|                             |                          |      |                             |                        |                   | Tocilizumab 4mg                                         | Tofacitinib 5mg           | ACR20 response  | 24W-6M                      | 1.20 (0.54-2.75)            |            |           |                                                                                                                                                                                                                                                                                                                                                                                                                                                                                                                                                                                                                                                                                            |                                                                                                                                                                                                         |          |              |
|                             |                          |      |                             |                        |                   | Rituximab                                               | Tofacitinib 10mg          | ACR20 response  | 24W-6M                      | 1.26 (0.64-2.46)            |            |           |                                                                                                                                                                                                                                                                                                                                                                                                                                                                                                                                                                                                                                                                                            |                                                                                                                                                                                                         |          |              |
|                             |                          |      |                             |                        |                   | Abatacept                                               | Tofacitinib 5mg           | ACR20 response  | 24W-6M                      | 1.26 (0.61-2.63)            |            |           |                                                                                                                                                                                                                                                                                                                                                                                                                                                                                                                                                                                                                                                                                            |                                                                                                                                                                                                         |          |              |
|                             |                          |      |                             |                        |                   | Rituximab                                               | Tofacitinib 5mg           | ACR20 response  | 24W-6M                      | 1.44 (0.73-2.82)            |            |           |                                                                                                                                                                                                                                                                                                                                                                                                                                                                                                                                                                                                                                                                                            |                                                                                                                                                                                                         |          |              |
|                             |                          |      |                             |                        |                   | Tocilizumab 8mg                                         | Rituximab                 | ACR20 response  | 24W-6M                      | 1.92 (0.93-4.04)            |            |           |                                                                                                                                                                                                                                                                                                                                                                                                                                                                                                                                                                                                                                                                                            |                                                                                                                                                                                                         |          |              |
|                             |                          |      |                             |                        |                   | Tocilizumab 8mg                                         | Abatacept                 | ACR20 response  | 24W-6M                      | 2.17 (1.01-4.89)            |            |           |                                                                                                                                                                                                                                                                                                                                                                                                                                                                                                                                                                                                                                                                                            |                                                                                                                                                                                                         |          |              |
|                             |                          |      |                             |                        |                   | Tocilizumab 8mg                                         | Tocilizumab 4mg           | ACR20 response  | 24W-6M                      | 2.29 (1.47-3.61)            |            |           |                                                                                                                                                                                                                                                                                                                                                                                                                                                                                                                                                                                                                                                                                            |                                                                                                                                                                                                         |          |              |
|                             |                          |      |                             |                        |                   | Tocilizumab 8mg                                         | Tofacitinib 10mg          | ACR20 response  | 24W-6M                      | 2.40 (1.09-5.41)            |            |           |                                                                                                                                                                                                                                                                                                                                                                                                                                                                                                                                                                                                                                                                                            |                                                                                                                                                                                                         |          |              |
|                             |                          |      |                             |                        |                   | Tocilizumab 8mg                                         | Tofacitinib 5mg           | ACR20 response  | 24W-6M                      | 2.74 (1.26-6.27)            |            |           |                                                                                                                                                                                                                                                                                                                                                                                                                                                                                                                                                                                                                                                                                            |                                                                                                                                                                                                         |          |              |
|                             |                          |      |                             |                        |                   | Tofacitinib 5mg                                         | Placebo                   | ACR20 response  | 24W-6M                      | 3.30 (1.95-5.66)            |            |           |                                                                                                                                                                                                                                                                                                                                                                                                                                                                                                                                                                                                                                                                                            |                                                                                                                                                                                                         |          |              |
|                             |                          |      |                             |                        |                   | Tofacitinib 10mg                                        | Placebo                   | ACR20 response  | 24W-6M                      | 3.76 (2.24-6.50)            |            |           |                                                                                                                                                                                                                                                                                                                                                                                                                                                                                                                                                                                                                                                                                            |                                                                                                                                                                                                         |          |              |
|                             |                          |      |                             |                        |                   | Tocilizumab 4mg                                         | Placebo                   | ACR20 response  | 24W-6M                      | 3.94 (2.19-7.48)            |            |           |                                                                                                                                                                                                                                                                                                                                                                                                                                                                                                                                                                                                                                                                                            |                                                                                                                                                                                                         |          |              |
|                             |                          |      |                             |                        |                   | Abatacept                                               | Placebo                   | ACR20 response  | 24W-6M                      | <b>4.15 (2.58-7.00)</b>     |            |           |                                                                                                                                                                                                                                                                                                                                                                                                                                                                                                                                                                                                                                                                                            |                                                                                                                                                                                                         |          |              |
|                             |                          |      |                             |                        |                   | Rituximab                                               | Placebo                   | ACR20 response  | 24W-6M                      | 4.73 (3.14-7.27)            |            |           |                                                                                                                                                                                                                                                                                                                                                                                                                                                                                                                                                                                                                                                                                            |                                                                                                                                                                                                         |          |              |
|                             |                          |      |                             |                        |                   | Tocilizumab 8mg                                         | Placebo                   | ACR20 response  | 24W-6M                      | 9.04 (5.15-17.08)           |            |           |                                                                                                                                                                                                                                                                                                                                                                                                                                                                                                                                                                                                                                                                                            |                                                                                                                                                                                                         |          |              |
| Malottki, 2011              | SLR: RCTs 5; Non-RCTs 30 | NR   | Failure of 1 TNFI           | NR                     | NR                | Rituximab                                               | (1 RCT) Placebo           | ACR20 response  | 6M                          | 2.85 (2.08-3.91)            |            |           |                                                                                                                                                                                                                                                                                                                                                                                                                                                                                                                                                                                                                                                                                            | Suggest that rituximab and abatacept are more effective than supportive care; Alternative TNFI is some benefit, although uncertainties regarding magnitude of treatment effects and cost-effectiveness. | Moderate | NR           |
|                             |                          |      |                             |                        |                   |                                                         |                           | ACR70 response  | 6M                          | 12.14 (2.96-49.86)          |            |           |                                                                                                                                                                                                                                                                                                                                                                                                                                                                                                                                                                                                                                                                                            |                                                                                                                                                                                                         |          |              |
|                             |                          |      |                             |                        |                   |                                                         |                           | DAS28           | Change from BL until 6M     | -1.50 (95%CI -1.74 - -1.26) |            |           |                                                                                                                                                                                                                                                                                                                                                                                                                                                                                                                                                                                                                                                                                            |                                                                                                                                                                                                         |          |              |
|                             |                          |      |                             |                        |                   |                                                         |                           | HAQ             | Change from BL until 6M     | -0.30 (95%CI -0.40 - -0.20) |            |           |                                                                                                                                                                                                                                                                                                                                                                                                                                                                                                                                                                                                                                                                                            |                                                                                                                                                                                                         |          |              |
|                             |                          |      |                             |                        |                   | Abatacept                                               | (1 RCT) Placebo           | ACR20 response  | 6M                          | 2.56 (1.77-3.69)            |            |           |                                                                                                                                                                                                                                                                                                                                                                                                                                                                                                                                                                                                                                                                                            |                                                                                                                                                                                                         |          |              |
|                             |                          |      |                             |                        |                   |                                                         |                           | ACR70 response  | 6M                          | 6.70 (1.62-27.80)           |            |           |                                                                                                                                                                                                                                                                                                                                                                                                                                                                                                                                                                                                                                                                                            |                                                                                                                                                                                                         |          |              |
|                             |                          |      |                             |                        |                   |                                                         |                           | DAS28           | Change from BL until 6M     | -1.27 (95%CI -1.62 - -0.93) |            |           |                                                                                                                                                                                                                                                                                                                                                                                                                                                                                                                                                                                                                                                                                            |                                                                                                                                                                                                         |          |              |
|                             |                          |      |                             |                        |                   | Alternative TNFI                                        | (28 uncontrolled studies) | HAQ             | Change from BL until 6M     | -0.34                       |            |           |                                                                                                                                                                                                                                                                                                                                                                                                                                                                                                                                                                                                                                                                                            | Improvement                                                                                                                                                                                             |          |              |
|                             |                          |      |                             |                        |                   |                                                         |                           | Effectiveness   | NA                          |                             |            |           |                                                                                                                                                                                                                                                                                                                                                                                                                                                                                                                                                                                                                                                                                            |                                                                                                                                                                                                         |          |              |
| <b>Rituximab vs placebo</b> |                          |      |                             |                        |                   |                                                         |                           |                 |                             |                             |            |           |                                                                                                                                                                                                                                                                                                                                                                                                                                                                                                                                                                                                                                                                                            |                                                                                                                                                                                                         |          |              |
| Alivernini, 2009            | SLR: RCTs 4; Non-RCTs 5  | 9030 | Failure of ≥1 TNFI          | NR                     | NR                | Adalimumab after failure of infliximab or etanercept    | -                         | -               | ACR70 response              | 33%                         |            |           |                                                                                                                                                                                                                                                                                                                                                                                                                                                                                                                                                                                                                                                                                            | Efficacy, irrespective of mode of action, in reaching ACR20 response is 5-15% for alternative TNFI, rituximab, abatacept and tocilizumab (except in two studies).                                       | High     | NR           |
|                             |                          |      |                             |                        |                   | Adalimumab after failure of infliximab                  | -                         | -               | ACR70 response              | 33%                         |            |           |                                                                                                                                                                                                                                                                                                                                                                                                                                                                                                                                                                                                                                                                                            |                                                                                                                                                                                                         |          |              |
|                             |                          |      |                             |                        |                   | Rituximab after failure of TNFI                         | -                         | Placebo         | ACR20 response              | 12%                         |            |           |                                                                                                                                                                                                                                                                                                                                                                                                                                                                                                                                                                                                                                                                                            |                                                                                                                                                                                                         |          |              |
|                             |                          |      |                             |                        |                   | Abatacept after failure of TNFI                         | -                         | Placebo         | ACR70 response              | 10.2%                       | 1.5%       |           |                                                                                                                                                                                                                                                                                                                                                                                                                                                                                                                                                                                                                                                                                            |                                                                                                                                                                                                         |          |              |
|                             |                          |      |                             |                        |                   | Tocilizumab after failure of TNFI                       | -                         | Placebo         | ACR70 response              | 10.4%                       |            |           |                                                                                                                                                                                                                                                                                                                                                                                                                                                                                                                                                                                                                                                                                            |                                                                                                                                                                                                         |          |              |
| Greenwald, 2011             | RCT                      | 51   | Failure of TNFI             | DAS28-ESR 6.7; HAQ 1.4 | 10.4Y             | Rituximab (2 times 500mg at days 1 and 15, intravenous) | 33                        | Placebo         | ACR20 response              | 24W                         | 30%        | 17%       |                                                                                                                                                                                                                                                                                                                                                                                                                                                                                                                                                                                                                                                                                            |                                                                                                                                                                                                         |          |              |
|                             |                          |      |                             |                        |                   |                                                         |                           |                 | ACR50 response              | 24W                         | 12%        | 6%        |                                                                                                                                                                                                                                                                                                                                                                                                                                                                                                                                                                                                                                                                                            |                                                                                                                                                                                                         |          |              |
|                             |                          |      |                             |                        |                   |                                                         |                           |                 | ACR70 response              | 24W                         | 0%         | 0%        |                                                                                                                                                                                                                                                                                                                                                                                                                                                                                                                                                                                                                                                                                            |                                                                                                                                                                                                         |          |              |
|                             |                          |      |                             |                        |                   |                                                         |                           |                 | DAS-ESR s3.2                | 24W                         | 25%        | 11%       |                                                                                                                                                                                                                                                                                                                                                                                                                                                                                                                                                                                                                                                                                            |                                                                                                                                                                                                         |          |              |
|                             |                          |      |                             |                        |                   |                                                         |                           |                 | HAQ-DI improvement of ≥0.25 | 24W                         | 28 (46.4%) | 4 (22.2%) |                                                                                                                                                                                                                                                                                                                                                                                                                                                                                                                                                                                                                                                                                            |                                                                                                                                                                                                         |          |              |
| Kim, 2014                   | SLR: RCTs 6              | 1524 | Failure of TNFI             | HAQ 1.6-1.9            | 9.6-21.6Y (range) | Golimumab + DMARD                                       | 153                       | Placebo + DMARD | ACR20 response              | 6M                          | 32.1%      | 15.5%     | 2.577 (1.518-4.496)                                                                                                                                                                                                                                                                                                                                                                                                                                                                                                                                                                                                                                                                        | Switching to non-TNF biologics was more effective than cycling TNFα inhibitor in TNF-IR patients; Probability (OR-1): 0.001; OR-1 favours golimumab                                                     | Moderate | Low-Moderate |
|                             |                          |      |                             |                        |                   |                                                         |                           |                 | ACR50 response              | 6M                          | 15.7%      | 4.2%      | 4.254 (1.947-10.550,-)                                                                                                                                                                                                                                                                                                                                                                                                                                                                                                                                                                                                                                                                     | Probability (OR-1): 0.028; OR-1 favours golimumab                                                                                                                                                       |          |              |
|                             |                          |      |                             |                        |                   |                                                         |                           |                 | ACR70 response              | 6M                          | 5.1%       | 1.3%      | 4.211 (1.605-13.460)                                                                                                                                                                                                                                                                                                                                                                                                                                                                                                                                                                                                                                                                       | Probability (OR-1): 0.014; OR-1 favours golimumab                                                                                                                                                       |          |              |
|                             |                          |      |                             |                        |                   |                                                         |                           |                 | HAQ                         | Change from BL until 6M     |            |           | -0.140 (-0.255 - -)                                                                                                                                                                                                                                                                                                                                                                                                                                                                                                                                                                                                                                                                        | Probability (OR-1): 0.000; OR-1 favours golimumab                                                                                                                                                       |          |              |
|                             |                          |      |                             |                        |                   | Abatacept + DMARD                                       | 256                       | Placebo + DMARD | ACR20 response              | 6M                          | 43.7%      | 15.5%     | 4.226 (2.606-7.023)                                                                                                                                                                                                                                                                                                                                                                                                                                                                                                                                                                                                                                                                        | Probability (OR-1): 0.021; OR-1 favours abatacept                                                                                                                                                       |          |              |
|                             |                          |      |                             |                        |                   |                                                         |                           |                 | ACR50 response              | 6M                          | 23.1%      | 4.2%      | 6.865 (1.900-20.870)                                                                                                                                                                                                                                                                                                                                                                                                                                                                                                                                                                                                                                                                       | Probability (OR-1): 0.192; OR-1 favours abatacept                                                                                                                                                       |          |              |
|                             |                          |      |                             |                        |                   |                                                         |                           |                 | ACR70 response              | 6M                          | 9.9%       | 1.3%      | 8.574 (2.312-56.850)                                                                                                                                                                                                                                                                                                                                                                                                                                                                                                                                                                                                                                                                       | Probability (OR-1): 0.176; OR-1 favours abatacept                                                                                                                                                       |          |              |
|                             |                          |      |                             |                        |                   |                                                         |                           |                 | HAQ                         | Change from BL until 6M     |            |           | -0.400 (-0.499 - -)                                                                                                                                                                                                                                                                                                                                                                                                                                                                                                                                                                                                                                                                        | Probability (OR-1): 0.744; OR-1 favours abatacept                                                                                                                                                       |          |              |
|                             |                          |      |                             |                        |                   | Rituximab + DMARD                                       | 298                       | Placebo + DMARD | ACR20 response              | 6M                          | 47.0%      | 15.5%     | 4.822 (3.176-7.492)                                                                                                                                                                                                                                                                                                                                                                                                                                                                                                                                                                                                                                                                        | Probability (OR-1): 0.039; OR-1 favours rituximab                                                                                                                                                       |          |              |
|                             |                          |      |                             |                        |                   |                                                         |                           |                 | ACR50 response              | 6M                          | 24.0%      | 4.2%      | 7.231 (3.1812-15.490)                                                                                                                                                                                                                                                                                                                                                                                                                                                                                                                                                                                                                                                                      | Probability (OR-1): 0.169; OR-1 favours rituximab                                                                                                                                                       |          |              |
|                             |                          |      |                             |                        |                   |                                                         |                           |                 | ACR70 response              | 6M                          | 17.3%      | 1.3%      | 16.320 (4.575-121.800)                                                                                                                                                                                                                                                                                                                                                                                                                                                                                                                                                                                                                                                                     | Probability (OR-1): 0.473; OR-1 favours rituximab                                                                                                                                                       |          |              |

| Author         | Year | Study ID            | Design | Population                         | Intervention        | Comparator      | Outcome                                     | HAQ                        | Change from BL until 6M | 95% CI            | OR (95% CI)                 | Interpretation                                                                                                                                                                                       |             |     |
|----------------|------|---------------------|--------|------------------------------------|---------------------|-----------------|---------------------------------------------|----------------------------|-------------------------|-------------------|-----------------------------|------------------------------------------------------------------------------------------------------------------------------------------------------------------------------------------------------|-------------|-----|
|                |      |                     |        |                                    | Tocilizumab + DMARD | Placebo + DMARD | ACR20 response                              | 6M                         | 62.4%                   | 15.5%             | 9.060 (5.064-17.000)        | OR-1 favours tocilizumab                                                                                                                                                                             |             |     |
|                |      |                     |        |                                    |                     |                 | ACR50 response                              | 6M                         | 32.2%                   | 4.2%              | 10.83 (4.731-29.690)        | OR-1 favours tocilizumab                                                                                                                                                                             |             |     |
|                |      |                     |        |                                    |                     |                 | ACR70 response                              | 6M                         | 14.4%                   | 1.3%              | 12.600 (3.474-86.120)       | OR-1 favours tocilizumab                                                                                                                                                                             |             |     |
|                |      |                     |        |                                    |                     |                 | HAQ                                         | Change from BL until 6M    |                         |                   | -0.300 (-0.397 - -0.203)    | OR-1 favours tocilizumab                                                                                                                                                                             |             |     |
|                |      |                     |        |                                    | Golimumab + DMARD   | Abatacept       | ACR20 response                              | 6M                         | 32.1%                   | 43.7%             | 1.639 (0.786-3.468)         | OR-1 favours abatacept                                                                                                                                                                               |             |     |
|                |      |                     |        |                                    |                     |                 | ACR50 response                              | 6M                         | 15.7%                   | 23.1%             | 1.623 (0.454-6.247)         | OR-1 favours abatacept                                                                                                                                                                               |             |     |
|                |      |                     |        |                                    |                     |                 | ACR70 response                              | 6M                         | 5.1%                    | 9.9%              | 2.048 (0.361-16.470)        | OR-1 favours abatacept                                                                                                                                                                               |             |     |
|                |      |                     |        |                                    |                     |                 | HAQ                                         | Change from BL until 6M    |                         |                   | -0.260 (-0.411 - -0.109)    | OR-1 favours abatacept                                                                                                                                                                               |             |     |
|                |      |                     |        |                                    | Golimumab + DMARD   | Rituximab       | ACR20 response                              | 6M                         | 32.1%                   | 47.0%             | 1.871 (0.937-3.725)         | OR-1 favours rituximab                                                                                                                                                                               |             |     |
|                |      |                     |        |                                    |                     |                 | ACR50 response                              | 6M                         | 15.7%                   | 24.0%             | 1.702 (0.558-5.087)         | OR-1 favours rituximab                                                                                                                                                                               |             |     |
|                |      |                     |        |                                    |                     |                 | ACR70 response                              | 6M                         | 5.1%                    | 17.3%             | 3.876 (0.685-35.370)        | OR-1 favours rituximab                                                                                                                                                                               |             |     |
|                |      |                     |        |                                    |                     |                 | HAQ                                         | Change from BL until 6M    |                         |                   | -0.160 (-0.310 - -0.010)    | OR-1 favours rituximab                                                                                                                                                                               |             |     |
|                |      |                     |        |                                    | Golimumab + DMARD   | Tocilizumab     | ACR20 response                              | 6M                         | 32.1%                   | 62.4%             | 3.520 (1.567-7.946)         | OR-1 favours tocilizumab                                                                                                                                                                             |             |     |
|                |      |                     |        |                                    |                     |                 | ACR50 response                              | 6M                         | 15.7%                   | 32.2%             | 2.552 (0.752-9.100)         | OR-1 favours tocilizumab                                                                                                                                                                             |             |     |
|                |      |                     |        |                                    |                     |                 | ACR70 response                              | 6M                         | 5.1%                    | 14.4%             | 3.107 (0.532-25.490)        | OR-1 favours tocilizumab                                                                                                                                                                             |             |     |
|                |      |                     |        |                                    |                     |                 | HAQ                                         | Change from BL until 6M    |                         |                   | -0.200 (-0.360 - -0.040)    | OR-1 favours tocilizumab                                                                                                                                                                             |             |     |
| Lee, 2016      | SLR  | RCTs 4              | 1796   | Inadequate response to TNFi        | NR                  | NR              | Tocilizumab 4mg                             | Tofacitinib 10mg           | ACR20 response          | 24W-6M            | 1.05 (0.47-2.39)            | OR-1 favours tocilizumab 4mg; Tocilizumab highest performance regarding early good response based on ACR 20 response, followed by rituximab, abatacept and tofacitinib.                              |             |     |
|                |      |                     |        |                                    |                     |                 | Abatacept                                   | Tocilizumab 4mg            | ACR20 response          | 24W-6M            | 1.06 (0.46-2.28)            | OR-1 favours abatacept                                                                                                                                                                               |             |     |
|                |      |                     |        |                                    |                     |                 | Abatacept                                   | Tofacitinib 10mg           | ACR20 response          | 24W-6M            | 1.10 (0.54-2.31)            | OR-1 favours abatacept                                                                                                                                                                               |             |     |
|                |      |                     |        |                                    |                     |                 | Rituximab                                   | Abatacept                  | ACR20 response          | 24W-6M            | 1.14 (0.59-2.15)            | OR-1 favours rituximab                                                                                                                                                                               |             |     |
|                |      |                     |        |                                    |                     |                 | Tofacitinib 10mg                            | Tofacitinib 5mg            | ACR20 response          | 24W-6M            | 1.14 (0.71-1.86)            | OR-1 favours tofacitinib 10mg                                                                                                                                                                        |             |     |
|                |      |                     |        |                                    |                     |                 | Rituximab                                   | Tocilizumab 4mg            | ACR20 response          | 24W-6M            | 1.20 (0.56-2.50)            | OR-1 favours rituximab                                                                                                                                                                               |             |     |
|                |      |                     |        |                                    |                     |                 | Tocilizumab 4mg                             | Tofacitinib 5mg            | ACR20 response          | 24W-6M            | 1.20 (0.54-2.75)            | OR-1 favours tocilizumab 4mg                                                                                                                                                                         |             |     |
|                |      |                     |        |                                    |                     |                 | Rituximab                                   | Tofacitinib 10mg           | ACR20 response          | 24W-6M            | 1.26 (0.64-2.46)            | OR-1 favours rituximab                                                                                                                                                                               |             |     |
|                |      |                     |        |                                    |                     |                 | Abatacept                                   | Tofacitinib 5mg            | ACR20 response          | 24W-6M            | 1.26 (0.61-2.63)            | OR-1 favours abatacept                                                                                                                                                                               |             |     |
|                |      |                     |        |                                    |                     |                 | Rituximab                                   | Tofacitinib 5mg            | ACR20 response          | 24W-6M            | 1.44 (0.73-2.82)            | OR-1 favours rituximab                                                                                                                                                                               |             |     |
|                |      |                     |        |                                    |                     |                 | Tocilizumab 8mg                             | Rituximab                  | ACR20 response          | 24W-6M            | 1.92 (0.93-4.04)            | OR-1 favours tocilizumab 8mg                                                                                                                                                                         |             |     |
|                |      |                     |        |                                    |                     |                 | Tocilizumab 8mg                             | Abatacept                  | ACR20 response          | 24W-6M            | 2.17 (1.01-4.89)            | OR-1 favours tocilizumab 8mg                                                                                                                                                                         |             |     |
|                |      |                     |        |                                    |                     |                 | Tocilizumab 8mg                             | Tocilizumab 4mg            | ACR20 response          | 24W-6M            | 2.29 (1.47-3.61)            | OR-1 favours tocilizumab 8mg                                                                                                                                                                         |             |     |
|                |      |                     |        |                                    |                     |                 | Tocilizumab 8mg                             | Tofacitinib 10mg           | ACR20 response          | 24W-6M            | 2.40 (1.09-5.41)            | OR-1 favours tocilizumab 8mg                                                                                                                                                                         |             |     |
|                |      |                     |        |                                    |                     |                 | Tocilizumab 8mg                             | Tofacitinib 5mg            | ACR20 response          | 24W-6M            | 2.74 (1.26-6.27)            | OR-1 favours tocilizumab 8mg                                                                                                                                                                         |             |     |
|                |      |                     |        |                                    |                     |                 | Tofacitinib 5mg                             | Placebo                    | ACR20 response          | 24W-6M            | 3.30 (1.95-5.66)            | OR-1 favours tofacitinib 5mg                                                                                                                                                                         |             |     |
|                |      |                     |        |                                    |                     |                 | Tofacitinib 10mg                            | Placebo                    | ACR20 response          | 24W-6M            | 3.76 (2.24-6.50)            | OR-1 favours tofacitinib 10mg                                                                                                                                                                        |             |     |
|                |      |                     |        |                                    |                     |                 | Tocilizumab 4mg                             | Placebo                    | ACR20 response          | 24W-6M            | 3.94 (2.19-7.48)            | OR-1 favours tocilizumab 4mg                                                                                                                                                                         |             |     |
|                |      |                     |        |                                    |                     |                 | Abatacept                                   | Placebo                    | ACR20 response          | 24W-6M            | 4.15 (2.58-7.00)            | OR-1 favours abatacept                                                                                                                                                                               |             |     |
|                |      |                     |        |                                    |                     |                 | Rituximab                                   | Placebo                    | ACR20 response          | 24W-6M            | 4.73 (3.14-7.27)            | OR-1 favours rituximab                                                                                                                                                                               |             |     |
|                |      |                     |        |                                    |                     |                 | Tocilizumab 8mg                             | Placebo                    | ACR20 response          | 24W-6M            | 9.04 (5.15-17.08)           | OR-1 favours tocilizumab 8mg                                                                                                                                                                         |             |     |
| Malottki, 2011 | SLR  | RCTs 5; Non-RCTs 30 | NR     | Failure of 1 TNFi                  | NR                  | NR              | Rituximab                                   | Placebo                    | ACR20 response          | 6M                | 2.85 (2.08-3.91)            | Suggest that rituximab and abatacept are more effective than supportive care; Alternative TNFi some benefit, although uncertainties regarding magnitude of treatment effects and cost-effectiveness. |             |     |
|                |      |                     |        |                                    |                     |                 |                                             | ACR70 response             | 6M                      |                   | 12.14 (2.96-49.86)          |                                                                                                                                                                                                      |             |     |
|                |      |                     |        |                                    |                     |                 |                                             | DAS28                      | Change from BL until 6M |                   | -1.50 (95%CI -1.74 - -1.26) |                                                                                                                                                                                                      |             |     |
|                |      |                     |        |                                    |                     |                 |                                             | HAQ                        | Change from BL until 6M |                   | -0.30 (95%CI -0.40 - -0.20) |                                                                                                                                                                                                      |             |     |
|                |      |                     |        |                                    |                     |                 | Abatacept                                   | (1 RCT) Placebo            | NR                      | ACR20 response    | 6M                          | 2.56 (1.77-3.69)                                                                                                                                                                                     |             |     |
|                |      |                     |        |                                    |                     |                 |                                             | ACR70 response             | 6M                      |                   | 6.70 (1.62-27.80)           |                                                                                                                                                                                                      |             |     |
|                |      |                     |        |                                    |                     |                 |                                             | DAS28                      | Change from BL until 6M |                   | -1.27 (95%CI -1.62 - -0.93) |                                                                                                                                                                                                      |             |     |
|                |      |                     |        |                                    |                     |                 | Alternative TNFi                            | (28 uncontr olled studies) | NA                      | HAQ Effectiveness |                             | -0.34                                                                                                                                                                                                | Improvement |     |
| Vital, 2015    | RCT  |                     | 25     | Insufficient response to rituximab | DAS28-CRP 5.8       | 7.0-9.5Y        | Additional dose of rituximab at W4 (1000mg) | Placebo                    | ACR20 response          | 28W               | 66.6%                       | 61.5%                                                                                                                                                                                                | p=0.79      | Low |

|                               |                         | (persistent B cells) | (range of medians)          | intravenous) |                   | ACR50 response                                       | 28W        | 25.0%                  | 30.7%     |                       | p=0.748                 |              |              |                              |                      |  |  |
|-------------------------------|-------------------------|----------------------|-----------------------------|--------------|-------------------|------------------------------------------------------|------------|------------------------|-----------|-----------------------|-------------------------|--------------|--------------|------------------------------|----------------------|--|--|
|                               |                         |                      |                             |              |                   | ACR70 response                                       | 28W        | 8.3%                   | 30.7%     |                       | p=0.161                 |              |              |                              |                      |  |  |
|                               |                         |                      |                             |              |                   | EULAR good response                                  | 28W        | 33.3%                  | 46.1%     |                       | p=0.513                 |              |              |                              |                      |  |  |
|                               |                         |                      |                             |              |                   | EULAR good/moderate response                         | 28W        | 91.6%                  | 76.9%     |                       | p=0.315                 |              |              |                              |                      |  |  |
| <b>Tocilizumab vs placebo</b> |                         |                      |                             |              |                   |                                                      |            |                        |           |                       |                         |              |              |                              |                      |  |  |
| <b>Alverini, 2009</b>         | SLR; RCTs 4; non-RCTs 5 | 9030                 | Failure of ≥1 TNFi          | NR           | NR                | Adalimumab after failure of infliximab or etanercept | -          | -                      | -         | ACR70 response        | 13%                     |              |              |                              |                      |  |  |
|                               |                         |                      |                             |              |                   | Adalimumab after failure of infliximab               | -          | -                      | -         | ACR70 response        | 33%                     |              |              |                              |                      |  |  |
|                               |                         |                      |                             |              |                   | Rituximab after failure of TNFi                      | -          | Placebo                | -         | ACR70 response        | 12%                     |              |              |                              |                      |  |  |
|                               |                         |                      |                             |              |                   | Abatacept after failure of TNFi                      | -          | Placebo                | -         | ACR70 response        | 10.2%                   | 1.5%         |              |                              |                      |  |  |
|                               |                         |                      |                             |              |                   | <b>Tocilizumab after failure of TNFi</b>             | -          | <b>Placebo</b>         | -         | <b>ACR70 response</b> | <b>12.4%</b>            |              |              |                              |                      |  |  |
| <b>Kim, 2014</b>              | SLR; RCTs 6             | 1524                 | Failure of TNFi             | HAQ 1.6-1.9  | 9.6-21.6y (range) | Golimumab + DMARD                                    | 153        | Placebo + DMARD        | NR        | ACR20 response        | 6M                      | 32.1%        | 15.5%        | 2.577 (1.518-4.496)          |                      |  |  |
|                               |                         |                      |                             |              |                   |                                                      |            |                        |           | ACR50 response        | 6M                      | 15.7%        | 4.2%         | 4.254 (1.947-10.550, -)      |                      |  |  |
|                               |                         |                      |                             |              |                   |                                                      |            |                        |           | ACR70 response        | 6M                      | 5.1%         | 1.3%         | 4.211 (1.605-13.460)         |                      |  |  |
|                               |                         |                      |                             |              |                   |                                                      |            |                        |           | HAQ                   | Change from BL until 6M |              |              |                              | -0.140 (-, -0.255 -) |  |  |
|                               |                         |                      |                             |              |                   | Abatacept + DMARD                                    | 256        | Placebo + DMARD        | NR        | ACR20 response        | 6M                      | 43.7%        | 15.5%        | 4.226 (2.606-7.023)          |                      |  |  |
|                               |                         |                      |                             |              |                   |                                                      |            |                        |           | ACR50 response        | 6M                      | 23.1%        | 4.2%         | 6.866 (2.900-20.670)         |                      |  |  |
|                               |                         |                      |                             |              |                   |                                                      |            |                        |           | ACR70 response        | 6M                      | 9.9%         | 1.3%         | 8.574 (2.312-56.850)         |                      |  |  |
|                               |                         |                      |                             |              |                   |                                                      |            |                        |           | HAQ                   | Change from BL until 6M |              |              |                              | -0.400 (-, -0.499 -) |  |  |
|                               |                         |                      |                             |              |                   | Rituximab + DMARD                                    | 298        | Placebo + DMARD        | NR        | ACR20 response        | 6M                      | 47.0%        | 15.5%        | 4.822 (3.176-7.492)          |                      |  |  |
|                               |                         |                      |                             |              |                   |                                                      |            |                        |           | ACR50 response        | 6M                      | 24.0%        | 4.2%         | 7.231 (3.1812-15.490)        |                      |  |  |
|                               |                         |                      |                             |              |                   |                                                      |            |                        |           | ACR70 response        | 6M                      | 17.3%        | 1.3%         | 16.220 (4.575-121.800)       |                      |  |  |
|                               |                         |                      |                             |              |                   |                                                      |            |                        |           | HAQ                   | Change from BL until 6M |              |              |                              | -0.300 (-, -0.397 -) |  |  |
|                               |                         |                      |                             |              |                   | <b>Tocilizumab + DMARD</b>                           | <b>170</b> | <b>Placebo + DMARD</b> | <b>NR</b> | <b>ACR20 response</b> | <b>6M</b>               | <b>62.4%</b> | <b>15.5%</b> | <b>9.060 (5.064-17.000)</b>  |                      |  |  |
|                               |                         |                      |                             |              |                   |                                                      |            |                        |           | <b>ACR50 response</b> | <b>6M</b>               | <b>32.2%</b> | <b>4.2%</b>  | <b>10.83 (4.731-29.690)</b>  |                      |  |  |
|                               |                         |                      |                             |              |                   |                                                      |            |                        |           | <b>ACR70 response</b> | <b>6M</b>               | <b>14.4%</b> | <b>1.3%</b>  | <b>12.900 (3.474-86.120)</b> |                      |  |  |
|                               |                         |                      |                             |              |                   |                                                      |            |                        |           | HAQ                   | Change from BL until 6M |              |              |                              | -0.340 (-, -0.453 -) |  |  |
|                               |                         |                      |                             |              |                   | Golimumab + DMARD                                    | 153        | Abatacept              | 256       | ACR20 response        | 6M                      | 32.1%        | 43.7%        | 1.639 (0.786-3.408)          |                      |  |  |
|                               |                         |                      |                             |              |                   |                                                      |            |                        |           | ACR50 response        | 6M                      | 15.7%        | 23.1%        | 1.623 (0.454-6.247)          |                      |  |  |
|                               |                         |                      |                             |              |                   |                                                      |            |                        |           | ACR70 response        | 6M                      | 5.1%         | 9.9%         | 2.048 (0.361-16.470)         |                      |  |  |
|                               |                         |                      |                             |              |                   |                                                      |            |                        |           | HAQ                   | Change from BL until 6M |              |              |                              | -0.260 (-, -0.411 -) |  |  |
|                               |                         |                      |                             |              |                   | Golimumab + DMARD                                    | 153        | Rituximab              | 298       | ACR20 response        | 6M                      | 32.1%        | 47.0%        | 1.871 (0.937-3.725)          |                      |  |  |
|                               |                         |                      |                             |              |                   |                                                      |            |                        |           | ACR50 response        | 6M                      | 15.7%        | 24.0%        | 1.702 (0.558-5.087)          |                      |  |  |
|                               |                         |                      |                             |              |                   |                                                      |            |                        |           | ACR70 response        | 6M                      | 5.1%         | 17.3%        | 3.876 (0.685-35.370)         |                      |  |  |
|                               |                         |                      |                             |              |                   |                                                      |            |                        |           | HAQ                   | Change from BL until 6M |              |              |                              | -0.160 (-, -0.310 -) |  |  |
|                               |                         |                      |                             |              |                   | Golimumab + DMARD                                    | 153        | Tocilizumab            | 170       | ACR20 response        | 6M                      | 32.1%        | 62.4%        | 3.520 (1.567-7.946)          |                      |  |  |
|                               |                         |                      |                             |              |                   |                                                      |            |                        |           | ACR50 response        | 6M                      | 15.7%        | 32.2%        | 2.552 (0.752-9.100)          |                      |  |  |
|                               |                         |                      |                             |              |                   |                                                      |            |                        |           | ACR70 response        | 6M                      | 5.1%         | 14.4%        | 3.107 (0.532-25.490)         |                      |  |  |
|                               |                         |                      |                             |              |                   |                                                      |            |                        |           | HAQ                   | Change from BL until 6M |              |              |                              | -0.200 (-, -0.360 -) |  |  |
| <b>Lee, 2016</b>              | SLR; RCTs 4             | 1796                 | Inadequate response to TNFi | NR           | NR                | Tocilizumab 4mg                                      |            | Tofacitinib 10mg       |           | ACR20 response        | 24W-6M                  |              |              | 1.05 (0.47-2.39)             |                      |  |  |
|                               |                         |                      |                             |              |                   | Abatacept                                            |            | Tocilizumab 4mg        |           | ACR20 response        | 24W-6M                  |              |              | 1.06 (0.46-2.28)             |                      |  |  |
|                               |                         |                      |                             |              |                   | Abatacept                                            |            | Tofacitinib 10mg       |           | ACR20 response        | 24W-6M                  |              |              | 1.10 (0.54-2.31)             |                      |  |  |
|                               |                         |                      |                             |              |                   | Rituximab                                            |            | Abatacept              |           | ACR20 response        | 24W-6M                  |              |              | 1.14 (0.59-2.15)             |                      |  |  |
|                               |                         |                      |                             |              |                   | Tofacitinib 10mg                                     |            | Tofacitinib 5mg        |           | ACR20 response        | 24W-6M                  |              |              | 1.14 (0.71-1.86)             |                      |  |  |
|                               |                         |                      |                             |              |                   | Rituximab                                            |            | Tocilizumab 4mg        |           | ACR20 response        | 24W-6M                  |              |              | 1.20 (0.56-2.50)             |                      |  |  |
|                               |                         |                      |                             |              |                   | Tocilizumab 4mg                                      |            | Tofacitinib 5mg        |           | ACR20 response        | 24W-6M                  |              |              | 1.20 (0.54-2.75)             |                      |  |  |
|                               |                         |                      |                             |              |                   | Rituximab                                            |            | Tofacitinib 10mg       |           | ACR20 response        | 24W-6M                  |              |              | 1.26 (0.64-2.46)             |                      |  |  |
|                               |                         |                      |                             |              |                   | Abatacept                                            |            | Tofacitinib 5mg        |           | ACR20 response        | 24W-6M                  |              |              | 1.26 (0.61-2.63)             |                      |  |  |
|                               |                         |                      |                             |              |                   | Rituximab                                            |            | Tofacitinib 5mg        |           | ACR20 response        | 24W-6M                  |              |              | 1.44 (0.73-2.82)             |                      |  |  |
|                               |                         |                      |                             |              |                   | Tocilizumab 8mg                                      |            | Rituximab              |           | ACR20 response        | 24W-6M                  |              |              | 1.92 (0.93-4.04)             |                      |  |  |
|                               |                         |                      |                             |              |                   | Tocilizumab 8mg                                      |            | Abatacept              |           | ACR20 response        | 24W-6M                  |              |              | 2.17 (1.01-4.89)             |                      |  |  |
|                               |                         |                      |                             |              |                   | Tocilizumab 8mg                                      |            | Tocilizumab 4mg        |           | ACR20 response        | 24W-6M                  |              |              | 2.29 (1.47-3.61)             |                      |  |  |
|                               |                         |                      |                             |              |                   | Tocilizumab 8mg                                      |            | Tofacitinib 10mg       |           | ACR20 response        | 24W-6M                  |              |              | 2.40 (1.09-5.41)             |                      |  |  |

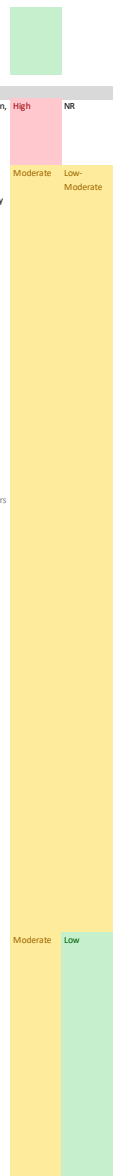

|                                                     |      |                                                       |                                                                                               |       |                                                                                                                                  |                                                                                                                                   |               |                                                                        |                                                                                                          |                                                          |                                                                                                                                           |            |                                                                                                                                                                                                                   |                                     |                                                                                                                        |                    |
|-----------------------------------------------------|------|-------------------------------------------------------|-----------------------------------------------------------------------------------------------|-------|----------------------------------------------------------------------------------------------------------------------------------|-----------------------------------------------------------------------------------------------------------------------------------|---------------|------------------------------------------------------------------------|----------------------------------------------------------------------------------------------------------|----------------------------------------------------------|-------------------------------------------------------------------------------------------------------------------------------------------|------------|-------------------------------------------------------------------------------------------------------------------------------------------------------------------------------------------------------------------|-------------------------------------|------------------------------------------------------------------------------------------------------------------------|--------------------|
|                                                     |      |                                                       |                                                                                               |       |                                                                                                                                  | Tocilizumab 8mg<br>Tofacitinib 5mg<br>Tofacitinib 10mg<br>Tocilizumab 4mg<br>Abatacept<br>Placebo<br>Rituximab<br>Tocilizumab 8mg |               | Tofacitinib 5mg<br>Placebo<br>Placebo<br>Placebo<br>Placebo<br>Placebo | ACR20 response<br>ACR20 response<br>ACR20 response<br>ACR20 response<br>ACR20 response<br>ACR20 response | 24W-6M<br>24W-6M<br>24W-6M<br>24W-6M<br>24W-6M<br>24W-6M | 2.74 (1.26-6.27)<br>3.30 (1.95-5.66)<br>3.76 (2.24-6.50)<br>3.94 (2.19-7.48)<br>4.15 (2.58-7.00)<br>4.73 (3.14-7.27)<br>9.04 (5.15-17.08) |            | OR=1 favours tocilizumab 8mg<br>OR=1 favours tofacitinib 5mg<br>OR=1 favours tofacitinib 10mg<br>OR=1 favours tocilizumab 4mg<br>OR=1 favours abatacept<br>OR=1 favours rituximab<br>OR=1 favours tocilizumab 8mg |                                     |                                                                                                                        |                    |
| <b>Sarilumab vs placebo</b>                         |      |                                                       |                                                                                               |       |                                                                                                                                  |                                                                                                                                   |               |                                                                        |                                                                                                          |                                                          |                                                                                                                                           |            |                                                                                                                                                                                                                   |                                     |                                                                                                                        |                    |
| <b>Fleischmann, RCT 2017</b>                        | 546  | Failure of TNF-I (inefficacy or intolerance)          | DAS28-CRP 6.2; HAQ-DI 1.8                                                                     | 12.1Y | Sarilumab (150mg, q2w, subcutaneous)                                                                                             | 181                                                                                                                               | Placebo       | 181                                                                    | ACR20 response                                                                                           | 24W                                                      | 101 (55.8%)                                                                                                                               | 61 (33.7%) |                                                                                                                                                                                                                   | p<0.0001                            |                                                                                                                        |                    |
|                                                     |      |                                                       |                                                                                               |       |                                                                                                                                  |                                                                                                                                   |               |                                                                        | ACR50 response                                                                                           | 24W                                                      | 67 (37.0%)                                                                                                                                | 33 (18.2%) |                                                                                                                                                                                                                   | p<0.0001                            |                                                                                                                        |                    |
|                                                     |      |                                                       |                                                                                               |       |                                                                                                                                  |                                                                                                                                   |               |                                                                        | ACR70 response                                                                                           | 24W                                                      | 36 (19.9%)                                                                                                                                | 13 (7.2%)  |                                                                                                                                                                                                                   | p<0.001                             |                                                                                                                        |                    |
|                                                     |      |                                                       |                                                                                               |       |                                                                                                                                  |                                                                                                                                   |               |                                                                        | Change from BL until 24W                                                                                 |                                                          |                                                                                                                                           |            | -2.4 (0.11)                                                                                                                                                                                                       | -1.4 (0.12)                         | Adjusted for previous anti-TNF agents, region, visit, treatment-by-visit interaction, and baseline score as covariates |                    |
|                                                     |      |                                                       |                                                                                               |       |                                                                                                                                  |                                                                                                                                   |               |                                                                        | HAQ-DI                                                                                                   | Change from BL until 12W                                 |                                                                                                                                           |            | -0.46, LSM                                                                                                                                                                                                        | -0.26, LSM                          | Adjusted for previous anti-TNF agents, region, visit, treatment-by-visit interaction, and baseline score as covariates |                    |
|                                                     |      |                                                       |                                                                                               |       | Sarilumab (200mg, q2w, subcutaneous)                                                                                             | 184                                                                                                                               | Placebo       | 181                                                                    | ACR20 response                                                                                           | 24W                                                      | 112 (60.9%)                                                                                                                               | 61 (33.7%) |                                                                                                                                                                                                                   | p<0.0001                            |                                                                                                                        |                    |
|                                                     |      |                                                       |                                                                                               |       |                                                                                                                                  |                                                                                                                                   |               |                                                                        | ACR50 response                                                                                           | 24W                                                      | 75 (40.8%)                                                                                                                                | 33 (18.2%) |                                                                                                                                                                                                                   | p<0.0001                            |                                                                                                                        |                    |
|                                                     |      |                                                       |                                                                                               |       |                                                                                                                                  |                                                                                                                                   |               |                                                                        | ACR70 response                                                                                           | 24W                                                      | 30 (16.3%)                                                                                                                                | 13 (7.2%)  |                                                                                                                                                                                                                   | p<0.01                              |                                                                                                                        |                    |
|                                                     |      |                                                       |                                                                                               |       |                                                                                                                                  |                                                                                                                                   |               |                                                                        | Change from BL until 24W                                                                                 |                                                          |                                                                                                                                           |            | -2.8 (0.11)                                                                                                                                                                                                       | -1.4 (0.12)                         | Adjusted for previous anti-TNF agents, region, visit, treatment-by-visit interaction, and baseline score as covariates |                    |
|                                                     |      |                                                       |                                                                                               |       |                                                                                                                                  |                                                                                                                                   |               |                                                                        | HAQ-DI                                                                                                   | Change from BL until 12W                                 |                                                                                                                                           |            | -0.47, LSM                                                                                                                                                                                                        | -0.26, LSM                          | Adjusted for previous anti-TNF agents, region, visit, treatment-by-visit interaction, and baseline score as covariates |                    |
| <b>Genovese, RCT 2017* (Additional analysis on)</b> |      |                                                       |                                                                                               |       |                                                                                                                                  |                                                                                                                                   |               |                                                                        |                                                                                                          |                                                          |                                                                                                                                           |            |                                                                                                                                                                                                                   |                                     |                                                                                                                        |                    |
|                                                     | 546  | Failure of TNF-I (inadequate response or intolerance) | HAQ-DI <0.5; 2.7% or intolerance)                                                             | NR    | Sarilumab (150mg, q2w, subcutaneous)                                                                                             | 181                                                                                                                               | Placebo       | 181                                                                    | CDAI ≤10                                                                                                 | 24W                                                      | 58 (32.0%)                                                                                                                                | 33 (18.2%) |                                                                                                                                                                                                                   | p<0.05                              |                                                                                                                        |                    |
|                                                     |      |                                                       |                                                                                               |       |                                                                                                                                  |                                                                                                                                   |               |                                                                        | SDAI ≤11                                                                                                 | 24W                                                      | 59 (32.6%)                                                                                                                                | 30 (16.6%) |                                                                                                                                                                                                                   | p<0.05                              |                                                                                                                        |                    |
|                                                     |      |                                                       |                                                                                               |       | Sarilumab (200mg, q2w, subcutaneous)                                                                                             | 184                                                                                                                               | Placebo       | 181                                                                    | CDAI ≤10                                                                                                 | 24W                                                      | 65 (35.3%)                                                                                                                                | 33 (18.2%) |                                                                                                                                                                                                                   | p<0.05                              |                                                                                                                        |                    |
| <b>Secukinumab vs placebo</b>                       |      |                                                       |                                                                                               |       |                                                                                                                                  |                                                                                                                                   |               |                                                                        |                                                                                                          |                                                          |                                                                                                                                           |            |                                                                                                                                                                                                                   |                                     |                                                                                                                        |                    |
| <b>Huang, 2019 SLR (3 RCTs)</b>                     | 1292 | Failure of ≥1 TNF-I                                   | NR                                                                                            | NR    | Secukinumab 75 or 150mg (Subcutaneous at BL, W1, W2, W3, W4 and then q4W; or intravenous 10mg/kg at BL, W2, W4 and then _mg q4W) | 859                                                                                                                               | Placebo       | 433                                                                    | ACR20                                                                                                    | 24W                                                      | 1.64 (1.33-2.01)                                                                                                                          |            |                                                                                                                                                                                                                   |                                     | RR=1 favours secukinumab                                                                                               |                    |
|                                                     |      |                                                       |                                                                                               |       |                                                                                                                                  |                                                                                                                                   |               |                                                                        | ACR50                                                                                                    | 24W                                                      | 1.77 (1.17-2.66)                                                                                                                          |            |                                                                                                                                                                                                                   |                                     |                                                                                                                        |                    |
|                                                     |      |                                                       |                                                                                               |       |                                                                                                                                  |                                                                                                                                   |               |                                                                        | ACR70                                                                                                    | 24W                                                      | 2.03 (1.14-3.60)                                                                                                                          |            |                                                                                                                                                                                                                   |                                     |                                                                                                                        |                    |
|                                                     |      |                                                       |                                                                                               |       | Secukinumab 150mg (Subcutaneous at BL, W1, W2, W3, W4 and then q4W; or intravenous 10mg/kg at BL, W2, W4 and then _mg q4W)       | 431                                                                                                                               | Placebo       | 433                                                                    | ACR20                                                                                                    | 24W                                                      | 1.66 (1.33-2.08)                                                                                                                          |            |                                                                                                                                                                                                                   |                                     | RR=1 favours secukinumab                                                                                               |                    |
|                                                     |      |                                                       |                                                                                               |       |                                                                                                                                  |                                                                                                                                   |               |                                                                        | ACR50                                                                                                    | 24W                                                      | 1.88 (1.29-2.72)                                                                                                                          |            |                                                                                                                                                                                                                   |                                     |                                                                                                                        |                    |
|                                                     |      |                                                       |                                                                                               |       |                                                                                                                                  |                                                                                                                                   |               |                                                                        | ACR70                                                                                                    | 24W                                                      | 2.15 (1.15-4.02)                                                                                                                          |            |                                                                                                                                                                                                                   |                                     |                                                                                                                        |                    |
|                                                     |      |                                                       |                                                                                               |       | Secukinumab 75mg (Subcutaneous at BL, W1, W2, W3, W4 and then q4W; or intravenous 10mg/kg at BL, W2, W4 and then _mg q4W)        | 428                                                                                                                               | Placebo       | 433                                                                    | ACR20                                                                                                    | 24W                                                      | 1.62 (1.29-2.03)                                                                                                                          |            |                                                                                                                                                                                                                   |                                     | RR=1 favours secukinumab                                                                                               |                    |
|                                                     |      |                                                       |                                                                                               |       |                                                                                                                                  |                                                                                                                                   |               |                                                                        | ACR50                                                                                                    | 24W                                                      | 1.68 (0.99-2.85)                                                                                                                          |            |                                                                                                                                                                                                                   |                                     |                                                                                                                        |                    |
|                                                     |      |                                                       |                                                                                               |       |                                                                                                                                  |                                                                                                                                   |               |                                                                        | ACR70                                                                                                    | 24W                                                      | 1.81 (0.78-4.21)                                                                                                                          |            |                                                                                                                                                                                                                   |                                     |                                                                                                                        |                    |
| <b>Olokizumab vs placebo</b>                        |      |                                                       |                                                                                               |       |                                                                                                                                  |                                                                                                                                   |               |                                                                        |                                                                                                          |                                                          |                                                                                                                                           |            |                                                                                                                                                                                                                   |                                     |                                                                                                                        |                    |
| <b>Genovese, RCT 2014c</b>                          | 221  | Failure of TNF-I                                      | DAS28-CRP 5.77; CDAI 38.90 (34.3-71.2), median (range); HAQ-DI 1.63 (0.0-3.0), median (range) | 9.99Y | Olokizumab (all doses, subcutaneous)                                                                                             | 132                                                                                                                               | Placebo       | 22                                                                     | ACR20 response                                                                                           | 12W                                                      |                                                                                                                                           |            |                                                                                                                                                                                                                   |                                     | p=0.0636                                                                                                               | Favours olokizumab |
|                                                     |      |                                                       |                                                                                               |       | Olokizumab (60mg q4w, subcutaneous)                                                                                              | 22                                                                                                                                | Placebo (q4w) | 22                                                                     | ACR20 response                                                                                           | 12W                                                      | 12 (75.0%)                                                                                                                                | 1 (5.0%)   |                                                                                                                                                                                                                   |                                     | p=0.0574                                                                                                               | Favours olokizumab |
|                                                     |      |                                                       |                                                                                               |       |                                                                                                                                  |                                                                                                                                   |               |                                                                        | ACR50 response                                                                                           | 12W                                                      | 6 (37.5%)                                                                                                                                 | 0 (0%)     |                                                                                                                                                                                                                   |                                     |                                                                                                                        |                    |
|                                                     |      |                                                       |                                                                                               |       |                                                                                                                                  |                                                                                                                                   |               |                                                                        | Change from BL until 12W                                                                                 |                                                          |                                                                                                                                           |            | -2.04 (0.26) (LS mean (SE))                                                                                                                                                                                       | -0.16 (0.25) (LS mean (SE))         |                                                                                                                        |                    |
|                                                     |      |                                                       |                                                                                               |       |                                                                                                                                  |                                                                                                                                   |               |                                                                        | CDAI                                                                                                     | Change from BL until 12W                                 |                                                                                                                                           |            | -18.51 (-69.2-48.0) (median (range))                                                                                                                                                                              | -3.03 (-44.1-23.8) (median (range)) |                                                                                                                        |                    |
|                                                     |      |                                                       |                                                                                               |       |                                                                                                                                  |                                                                                                                                   |               |                                                                        | HAQ-DI                                                                                                   | Change from BL until 12W                                 |                                                                                                                                           |            | -0.50 (-1.6--0.1) (median (range))                                                                                                                                                                                | 0.06 (-1.0-2.1) (median (range))    |                                                                                                                        |                    |
|                                                     |      |                                                       |                                                                                               |       | Olokizumab (60mg q2w, subcutaneous)                                                                                              | 20                                                                                                                                | Placebo (q2w) | 22                                                                     | ACR20 response                                                                                           | 12W                                                      | 6 (35.3%)                                                                                                                                 | 7 (33.3%)  |                                                                                                                                                                                                                   |                                     |                                                                                                                        |                    |
|                                                     |      |                                                       |                                                                                               |       |                                                                                                                                  |                                                                                                                                   |               |                                                                        | ACR50 response                                                                                           | 12W                                                      | 3 (17.6%)                                                                                                                                 | 1 (4.8%)   |                                                                                                                                                                                                                   |                                     |                                                                                                                        |                    |
|                                                     |      |                                                       |                                                                                               |       |                                                                                                                                  |                                                                                                                                   |               |                                                                        | Change from BL until 12W                                                                                 |                                                          |                                                                                                                                           |            | -1.53 (0.27) (LS mean (SE))                                                                                                                                                                                       | -0.65 (0.25) (LS mean (SE))         |                                                                                                                        |                    |
|                                                     |      |                                                       |                                                                                               |       |                                                                                                                                  |                                                                                                                                   |               |                                                                        | CDAI                                                                                                     | Change from BL until 12W                                 |                                                                                                                                           |            | 8.00 (36.5-19.0) (median (range))                                                                                                                                                                                 | 8.95 (-41.5-13.8) (median (range))  |                                                                                                                        |                    |
|                                                     |      |                                                       |                                                                                               |       |                                                                                                                                  |                                                                                                                                   |               |                                                                        | HAQ-DI                                                                                                   | Change from BL until 12W                                 |                                                                                                                                           |            | -0.25 (-1.0-0.9) (median (range))                                                                                                                                                                                 | 0.00 (-1.0-0.6) (median (range))    |                                                                                                                        |                    |
|                                                     |      |                                                       |                                                                                               |       | Olokizumab (120mg q4w, subcutaneous)                                                                                             | 23                                                                                                                                |               |                                                                        | ACR20 response                                                                                           | 12W                                                      | 11 (61.1%)                                                                                                                                |            |                                                                                                                                                                                                                   |                                     |                                                                                                                        |                    |
|                                                     |      |                                                       |                                                                                               |       |                                                                                                                                  |                                                                                                                                   |               |                                                                        | ACR50 response                                                                                           | 12W                                                      | 3 (16.7%)                                                                                                                                 |            |                                                                                                                                                                                                                   |                                     |                                                                                                                        |                    |

| Study            | Design                   | N   | Intervention                 | Comparator                                                                                                                                                    | Primary Outcome | Secondary Outcomes                                                  | Statistical Results | Significance |                |                          |       |                               |                               |          |          |
|------------------|--------------------------|-----|------------------------------|---------------------------------------------------------------------------------------------------------------------------------------------------------------|-----------------|---------------------------------------------------------------------|---------------------|--------------|----------------|--------------------------|-------|-------------------------------|-------------------------------|----------|----------|
| Takeuchi, 2016   | RCT                      | 119 | Failure of TNF $\alpha$      | DAS28-CRP 5.3 [3.4-8.0], median (range); CDAI 30.3 (12.6-70.4), median (range); SDAI 51.3 (19.5-149.8), median (range); HAQ-DI 1.13 (0.0-3.0), median (range) | 7.0Y, median    | Olokizumab (60mg q4w and placebo every 2 other weeks, subcutaneous) | 32                  | Placebo      | 29             | ACR20 response           | 12W   | 58.7%                         | 21.9%                         |          | p=0.0090 |
|                  |                          |     |                              |                                                                                                                                                               |                 |                                                                     |                     |              | ACR50 response | 12W                      | 35.7% | 8.6%                          |                               | p=0.0310 |          |
|                  |                          |     |                              |                                                                                                                                                               |                 |                                                                     |                     |              | ACR70 response | 12W                      | 9.6%  | 3.8%                          |                               | ns       |          |
|                  |                          |     |                              |                                                                                                                                                               |                 |                                                                     |                     |              | DAS28-ESR      | Change from BL until 12W |       | -2.67 (95%CI -310- -224), LSM | -0.56 (95%CI -102- -010), LSM |          | p<0.0001 |
|                  |                          |     |                              |                                                                                                                                                               |                 |                                                                     |                     |              | CDAI           | Change from BL until 12W |       | -152 (95%CI -191- -114), LSM  | -75 (95%CI -116- -34), LSM    |          | p=0.0039 |
|                  |                          |     |                              |                                                                                                                                                               |                 |                                                                     |                     |              | SDAI           | Change from BL until 12W |       | -394 (95%CI -459- -330), LSM  | -75 (95%CI -141- -04), LSM    |          | p<0.0001 |
|                  |                          |     |                              |                                                                                                                                                               |                 |                                                                     |                     |              | HAQ            | Change from BL until 12W |       | -04 (95%CI -05- -02), LSM     | 0.0 (95%CI -02-0.2), LSM      |          | p=0.0005 |
|                  |                          |     |                              |                                                                                                                                                               |                 |                                                                     |                     |              | ACR20 response | 12W                      | 62.5% | 21.9%                         |                               | p=0.0041 |          |
|                  |                          |     |                              |                                                                                                                                                               |                 |                                                                     |                     |              | ACR50 response | 12W                      | 42.1% | 8.6%                          |                               | p=0.0125 |          |
|                  |                          |     |                              |                                                                                                                                                               |                 |                                                                     |                     |              | ACR70 response | 12W                      | 22.5% | 3.8%                          |                               | ns       |          |
|                  |                          |     |                              |                                                                                                                                                               |                 |                                                                     |                     |              | DAS28-ESR      | Change from BL until 12W |       | -289 (95%CI -332- -246), LSM  | -0.56 (95%CI -102- -010), LSM |          | p<0.0001 |
|                  |                          |     |                              |                                                                                                                                                               |                 |                                                                     |                     |              | CDAI           | Change from BL until 12W |       | -197 (-235- -159), LSM        | -75 (95%CI -116- -34), LSM    |          |          |
| SDAI             | Change from BL until 12W |     | -446 (95%CI -510- -383), LSM | -75 (95%CI -141- -04), LSM                                                                                                                                    |                 |                                                                     |                     |              |                |                          |       |                               |                               |          |          |
| HAQ              | Change from BL until 12W |     | -04 (95%CI -05- -02), LSM    | 0.0 (95%CI -02-0.2), LSM                                                                                                                                      |                 |                                                                     |                     |              |                |                          |       |                               |                               |          |          |
| Charles-Schoeman | Non-RCT                  | 705 | Failure of $\geq 1$ bDMARD   | DAS28 6.4; SDAI 39.3; CDAI 37.4; HAQ-DI 1.4                                                                                                                   | 8.79Y           | Tofacitinib (5mg, 2/D, oral)                                        | 258                 | Placebo      | 191            | ACR20 response           | 3M    | 112 (43.4%)                   | 47 (24.6%)                    |          | p<0.0001 |
|                  |                          |     |                              |                                                                                                                                                               |                 |                                                                     |                     |              | ACR50 response | 3M                       | 36.5% | 12.1%                         |                               |          |          |
|                  |                          |     |                              |                                                                                                                                                               |                 |                                                                     |                     |              | ACR70 response | 3M                       | 11.1% | 3.8%                          |                               |          |          |
|                  |                          |     |                              |                                                                                                                                                               |                 |                                                                     |                     |              | DAS28-ESR      | Change from BL until 12W |       | -318 (95%CI -365- -269), LSM  | -0.56 (95%CI -102- -010), LSM |          | p<0.0001 |
|                  |                          |     |                              |                                                                                                                                                               |                 |                                                                     |                     |              | CDAI           | Change from BL until 12W |       | -208 (95%CI -251- -164), LSM  | -75 (95%CI -116- -34), LSM    |          | p<0.0001 |
|                  |                          |     |                              |                                                                                                                                                               |                 |                                                                     |                     |              | SDAI           | Change from BL until 12W |       | -461 (95%CI -533- -388), LSM  | -75 (95%CI -141- -04), LSM    |          | p<0.0001 |
|                  |                          |     |                              |                                                                                                                                                               |                 |                                                                     |                     |              | HAQ            | Change from BL until 12W |       | -04 (95%CI -05- -02), LSM     | 0.0 (95%CI -02-0.2), LSM      |          | p=0.0023 |

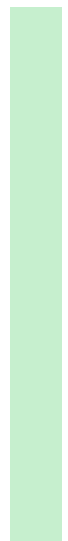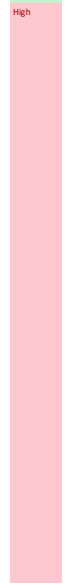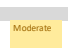



| Year                                               | Author                   | Study ID | Design                                        | Primary Outcome                          | Comparison                                      | Intervention                  | Control                    | Events (n/N) | Events (n/N)            | OR (95% CI)              | p-value                  | Notes                | Quality                   |                           |                           |            |                  |                              |          |
|----------------------------------------------------|--------------------------|----------|-----------------------------------------------|------------------------------------------|-------------------------------------------------|-------------------------------|----------------------------|--------------|-------------------------|--------------------------|--------------------------|----------------------|---------------------------|---------------------------|---------------------------|------------|------------------|------------------------------|----------|
| 2016                                               |                          |          |                                               |                                          |                                                 | Tofacitinib (10mg, 2/D, oral) | Placebo                    | 191          | ACR50 response          | 3M                       | 63 (24.4%)               | 20 (10.5%)           | -1.62                     | -0.78                     | p<0.0001                  |            |                  |                              |          |
|                                                    |                          |          |                                               |                                          |                                                 |                               |                            |              | ACR70 response          | 3M                       | 25 (9.7%)                | 6 (3.1%)             |                           |                           |                           |            |                  |                              |          |
|                                                    |                          |          |                                               |                                          |                                                 |                               |                            |              | DAS28                   | Change from BL until 3M  | 3M                       | 29.5%                |                           |                           |                           | 14.4%      |                  |                              |          |
|                                                    |                          |          |                                               |                                          |                                                 |                               |                            |              | CDAI s10                | 3M                       | 29.8%                    | 13.8%                |                           |                           |                           |            |                  |                              |          |
|                                                    |                          |          |                                               |                                          |                                                 |                               |                            |              | SDAI s11                | 3M                       | 29.8%                    | 13.8%                |                           |                           |                           |            |                  |                              |          |
|                                                    |                          |          |                                               |                                          |                                                 |                               |                            |              | HAQ-DI                  | Change from BL until 3M  | 3M                       | 130 (51.8%)          |                           |                           |                           | 47 (24.6%) | -0.31            | -0.09                        | p<0.0001 |
|                                                    |                          |          |                                               |                                          |                                                 |                               |                            |              | ACR20 response          | 3M                       | 70 (27.9%)               | 20 (10.5%)           |                           |                           |                           |            |                  |                              |          |
|                                                    |                          |          |                                               |                                          |                                                 |                               |                            |              | ACR70 response          | 3M                       | 31 (12.4%)               | 6 (3.1%)             |                           |                           |                           |            |                  |                              |          |
|                                                    |                          |          |                                               |                                          |                                                 |                               |                            |              | DAS28                   | Change from BL until 3M  | 3M                       | 35.9%                |                           |                           |                           | 14.4%      |                  |                              |          |
|                                                    |                          |          |                                               |                                          |                                                 |                               |                            |              | CDAI s10                | 3M                       | 38.3%                    | 13.8%                |                           |                           |                           |            |                  |                              |          |
|                                                    |                          |          |                                               |                                          |                                                 |                               |                            |              | SDAI s11                | 3M                       | 38.3%                    | 13.8%                |                           |                           |                           |            |                  |                              |          |
|                                                    |                          |          |                                               |                                          |                                                 |                               |                            |              | Charles-Schoeman, 2017* | RCT                      | 838                      | Failure of ≥1 bDMARD |                           |                           |                           | NR         | NR               | Tofacitinib (5mg, 2/D, oral) | Placebo  |
| ACR70 response                                     | 3M                       | 12.7%    | 4.9%                                          |                                          |                                                 |                               |                            |              |                         |                          |                          |                      |                           |                           |                           |            |                  |                              |          |
| DAS28-ESR s3.2                                     | 3M                       | 50.6%    | 24.6%                                         |                                          |                                                 |                               |                            |              |                         |                          |                          |                      |                           |                           |                           |            |                  |                              |          |
| CDAI s10                                           | 3M                       | 15.8%    | 4.9%                                          |                                          |                                                 |                               |                            |              |                         |                          |                          |                      |                           |                           |                           |            |                  |                              |          |
| SDAI s11                                           | 3M                       | 42.9%    | 17.7%                                         |                                          |                                                 |                               |                            |              |                         |                          |                          |                      |                           |                           |                           |            |                  |                              |          |
| HAQ-DI                                             | Change from BL until 3M  | 3M       | 62.5%                                         | 17.7%                                    | 1.05 (0.47-2.39)                                |                               |                            |              |                         |                          |                          |                      |                           |                           |                           |            |                  |                              |          |
| ACR20 response                                     | 24W-6M                   |          |                                               |                                          |                                                 |                               |                            |              |                         |                          |                          |                      |                           |                           |                           |            |                  |                              |          |
| ACR50 response                                     | 24W-6M                   |          |                                               |                                          |                                                 |                               |                            |              |                         |                          |                          |                      |                           |                           |                           |            |                  |                              |          |
| ACR70 response                                     | 24W-6M                   |          |                                               |                                          |                                                 |                               |                            |              |                         |                          |                          |                      |                           |                           |                           |            |                  |                              |          |
| DAS28-ESR s3.2                                     | 24W-6M                   |          |                                               |                                          |                                                 |                               |                            |              |                         |                          |                          |                      |                           |                           |                           |            |                  |                              |          |
| CDAI s10                                           | 24W-6M                   |          |                                               |                                          |                                                 |                               |                            |              |                         |                          |                          |                      |                           |                           |                           |            |                  |                              |          |
| SDAI s11                                           | 24W-6M                   |          |                                               |                                          |                                                 |                               |                            |              |                         |                          |                          |                      |                           |                           |                           |            |                  |                              |          |
| Fleischmann, 2012                                  | RCT                      | 140      | Failure of ≥1 bDMARD (inefficacy or toxicity) | NR                                       | NR                                              | Tofacitinib (5mg 2/D, oral)   | Placebo                    | 46           | ACR20 response          | 3M                       | 42.9%                    | 17.7%                | -0.43 (0.04), LSM         | -0.18 (0.04), LSM         | p<0.0001                  |            |                  |                              |          |
|                                                    |                          |          |                                               |                                          |                                                 |                               |                            |              | ACR70 response          | 3M                       | 12.7%                    | 4.9%                 |                           |                           |                           |            |                  |                              |          |
|                                                    |                          |          |                                               |                                          |                                                 |                               |                            |              | DAS28-ESR s3.2          | 3M                       | 50.6%                    | 24.6%                |                           |                           |                           |            |                  |                              |          |
|                                                    |                          |          |                                               |                                          |                                                 |                               |                            |              | CDAI s10                | 3M                       | 15.8%                    | 4.9%                 |                           |                           |                           |            |                  |                              |          |
|                                                    |                          |          |                                               |                                          |                                                 |                               |                            |              | SDAI s11                | 3M                       | 42.9%                    | 17.7%                |                           |                           |                           |            |                  |                              |          |
|                                                    |                          |          |                                               |                                          |                                                 |                               |                            |              | HAQ-DI                  | Change from BL until 3M  | 3M                       | 62.5%                |                           |                           |                           | 17.7%      | 0.43 (0.04), LSM | 0.18 (0.04), LSM             | p<0.0001 |
|                                                    |                          |          |                                               |                                          |                                                 |                               |                            |              | ACR20 response          | 24W-6M                   |                          |                      |                           |                           |                           |            |                  |                              |          |
|                                                    |                          |          |                                               |                                          |                                                 |                               |                            |              | ACR50 response          | 24W-6M                   |                          |                      |                           |                           |                           |            |                  |                              |          |
|                                                    |                          |          |                                               |                                          |                                                 |                               |                            |              | ACR70 response          | 24W-6M                   |                          |                      |                           |                           |                           |            |                  |                              |          |
|                                                    |                          |          |                                               |                                          |                                                 |                               |                            |              | DAS28-ESR s3.2          | 24W-6M                   |                          |                      |                           |                           |                           |            |                  |                              |          |
|                                                    |                          |          |                                               |                                          |                                                 |                               |                            |              | CDAI s10                | 24W-6M                   |                          |                      |                           |                           |                           |            |                  |                              |          |
|                                                    |                          |          |                                               |                                          |                                                 |                               |                            |              | SDAI s11                | 24W-6M                   |                          |                      |                           |                           |                           |            |                  |                              |          |
| Lee, 2016                                          | SLR: RCTs 4              | 1796     | Inadequate response to TNFi                   | NR                                       | NR                                              | Tofacitinib (10mg 2/D, oral)  | Placebo                    | 60           | ACR20 response          | 3M                       | 42.9%                    | 17.7%                | -0.46 (0.04), LSM         | -0.18 (0.04), LSM         | p<0.0001                  |            |                  |                              |          |
|                                                    |                          |          |                                               |                                          |                                                 |                               |                            |              | ACR70 response          | 3M                       | 12.7%                    | 4.9%                 |                           |                           |                           |            |                  |                              |          |
|                                                    |                          |          |                                               |                                          |                                                 |                               |                            |              | DAS28-ESR s3.2          | 3M                       | 50.6%                    | 24.6%                |                           |                           |                           |            |                  |                              |          |
|                                                    |                          |          |                                               |                                          |                                                 |                               |                            |              | CDAI s10                | 3M                       | 15.8%                    | 4.9%                 |                           |                           |                           |            |                  |                              |          |
|                                                    |                          |          |                                               |                                          |                                                 |                               |                            |              | SDAI s11                | 3M                       | 42.9%                    | 17.7%                |                           |                           |                           |            |                  |                              |          |
|                                                    |                          |          |                                               |                                          |                                                 |                               |                            |              | HAQ-DI                  | Change from BL until 3M  | 3M                       | 62.5%                |                           |                           |                           | 17.7%      | 3.80 (2.05-6.80) |                              |          |
|                                                    |                          |          |                                               |                                          |                                                 |                               |                            |              | ACR20 response          | 12W                      |                          |                      |                           |                           |                           |            |                  |                              |          |
|                                                    |                          |          |                                               |                                          |                                                 |                               |                            |              | ACR70 response          | 12W                      |                          |                      |                           |                           |                           |            |                  |                              |          |
|                                                    |                          |          |                                               |                                          |                                                 |                               |                            |              | DAS28-ESR s3.2          | 12W                      |                          |                      |                           |                           |                           |            |                  |                              |          |
|                                                    |                          |          |                                               |                                          |                                                 |                               |                            |              | CDAI s10                | 12W                      |                          |                      |                           |                           |                           |            |                  |                              |          |
|                                                    |                          |          |                                               |                                          |                                                 |                               |                            |              | SDAI s11                | 12W                      |                          |                      |                           |                           |                           |            |                  |                              |          |
|                                                    |                          |          |                                               |                                          |                                                 |                               |                            |              | HAQ-DI                  | Change from BL until 12W | 12W                      | 34%                  |                           |                           |                           | 14%        |                  |                              |          |
| Strand, 2015 (Additional analysis on Vieira, 2016) | RCT                      | 399      | Failure of ≥1 TNFi                            | HAQ 1.58                                 | 11.3-13.0Y                                      | Tofacitinib (5mg 2/D, oral)   | Placebo                    | 133          | ACR20 response          | 24W-6M                   | 3.30 (1.95-5.66)         | -0.43 (0.04), LSM    | -0.18 (0.04), LSM         | p<0.0001                  |                           |            |                  |                              |          |
|                                                    |                          |          |                                               |                                          |                                                 |                               |                            |              | ACR70 response          | 24W-6M                   | 3.76 (2.24-6.50)         |                      |                           |                           |                           |            |                  |                              |          |
|                                                    |                          |          |                                               |                                          |                                                 |                               |                            |              | DAS28-ESR s3.2          | 24W-6M                   | 3.94 (2.19-7.48)         |                      |                           |                           |                           |            |                  |                              |          |
|                                                    |                          |          |                                               |                                          |                                                 |                               |                            |              | CDAI s10                | 24W-6M                   | 4.15 (2.58-7.00)         |                      |                           |                           |                           |            |                  |                              |          |
|                                                    |                          |          |                                               |                                          |                                                 |                               |                            |              | SDAI s11                | 24W-6M                   | 4.73 (3.14-7.27)         |                      |                           |                           |                           |            |                  |                              |          |
|                                                    |                          |          |                                               |                                          |                                                 |                               |                            |              | HAQ-DI                  | Change from BL until 3M  | 24W-6M                   |                      |                           |                           | 9.04 (5.15-17.08)         |            |                  |                              |          |
|                                                    |                          |          |                                               |                                          |                                                 |                               |                            |              | ACR20 response          | 12W                      |                          |                      |                           |                           |                           |            |                  |                              |          |
|                                                    |                          |          |                                               |                                          |                                                 |                               |                            |              | ACR70 response          | 12W                      |                          |                      |                           |                           |                           |            |                  |                              |          |
|                                                    |                          |          |                                               |                                          |                                                 |                               |                            |              | DAS28-ESR s3.2          | 12W                      |                          |                      |                           |                           |                           |            |                  |                              |          |
|                                                    |                          |          |                                               |                                          |                                                 |                               |                            |              | CDAI s10                | 12W                      |                          |                      |                           |                           |                           |            |                  |                              |          |
|                                                    |                          |          |                                               |                                          |                                                 |                               |                            |              | SDAI s11                | 12W                      |                          |                      |                           |                           |                           |            |                  |                              |          |
|                                                    |                          |          |                                               |                                          |                                                 |                               |                            |              | HAQ-DI                  | Change from BL until 12W | 12W                      |                      |                           |                           | 34%                       | 14%        |                  |                              |          |
| Upadactinib vs placebo                             | Genovese, 2018b          | RCT      | 499                                           | Failure of bDMARDs (inadequate response) | DAS28-CRP 5.8; CDAI 40.9; SDAI 42.5; HAQ-DI 1.6 | 13.2Y                         | Upadactinib (15mg/D, oral) | Placebo      | 164                     | ACR20 response           | 12W                      | 106 (65%)            | 48 (28%)                  | -0.41 (95%CI -0.50 -0.33) | -0.16 (95%CI -0.25 -0.08) | p<0.0001   |                  |                              |          |
|                                                    |                          |          |                                               |                                          |                                                 |                               |                            |              |                         | ACR50 response           | 12W                      | 56 (34%)             | 20 (12%)                  |                           |                           |            |                  |                              |          |
|                                                    |                          |          |                                               |                                          |                                                 |                               |                            |              |                         | ACR70 response           | 12W                      | 19 (12%)             | 11 (7%)                   |                           |                           |            |                  |                              |          |
|                                                    |                          |          |                                               |                                          |                                                 |                               |                            |              |                         | DAS28-CRP                | Change from BL until 12W | 12W                  | 32%                       |                           |                           |            | 14%              |                              |          |
|                                                    |                          |          |                                               |                                          |                                                 |                               |                            |              |                         | CDAI s10                 | 12W                      | 32%                  | 14%                       |                           |                           |            |                  |                              |          |
|                                                    |                          |          |                                               |                                          |                                                 |                               |                            |              |                         | SDAI s11                 | 12W                      | 34%                  | 14%                       |                           |                           |            |                  |                              |          |
|                                                    |                          |          |                                               |                                          |                                                 |                               |                            |              |                         | HAQ-DI                   | Change from BL until 12W | 12W                  | 34%                       |                           |                           |            | 14%              |                              |          |
|                                                    |                          |          |                                               |                                          |                                                 |                               |                            |              |                         | ACR20 response           | 12W                      | 93 (56%)             | 48 (28%)                  |                           |                           |            |                  |                              |          |
|                                                    |                          |          |                                               |                                          |                                                 |                               |                            |              |                         | ACR50 response           | 12W                      | 59 (36%)             | 20 (12%)                  |                           |                           |            |                  |                              |          |
|                                                    |                          |          |                                               |                                          |                                                 |                               |                            |              |                         | ACR70 response           | 12W                      | 38 (23%)             | 11 (7%)                   |                           |                           |            |                  |                              |          |
|                                                    |                          |          |                                               |                                          |                                                 |                               |                            |              |                         | DAS28-CRP                | Change from BL until 12W | 12W                  | 34%                       |                           |                           |            | 14%              |                              |          |
|                                                    |                          |          |                                               |                                          |                                                 |                               |                            |              |                         | CDAI s10                 | 12W                      | 34%                  | 14%                       |                           |                           |            |                  |                              |          |
| SDAI s11                                           | 12W                      | 35%      | 14%                                           |                                          |                                                 |                               |                            |              |                         |                          |                          |                      |                           |                           |                           |            |                  |                              |          |
| HAQ-DI                                             | Change from BL until 12W | 12W      | 35%                                           | 14%                                      |                                                 |                               |                            |              |                         |                          |                          |                      |                           |                           |                           |            |                  |                              |          |
| Kremer, 2016                                       | RCT                      | 276      | Inadequate response to TNFi                   | DAS28-CRP 5.8; CDAI 41; HAQ-DI 1.6       | 11.9Y                                           | Upadactinib (3mg 2/D, oral)   | Placebo                    | 55           | ACR20 response          | 12W                      | 53%                      | 34%                  | -0.44 (95%CI -0.52 -0.35) | -0.16 (95%CI -0.25 -0.08) | p<0.0001                  |            |                  |                              |          |
|                                                    |                          |          |                                               |                                          |                                                 |                               |                            |              | ACR50 response          | 12W                      | 24%                      | 16%                  |                           |                           |                           |            |                  |                              |          |
|                                                    |                          |          |                                               |                                          |                                                 |                               |                            |              | ACR70 response          | 12W                      | 13%                      | 4%                   |                           |                           |                           |            |                  |                              |          |
|                                                    |                          |          |                                               |                                          |                                                 |                               |                            |              | DAS28-CRP               | Change from BL until 12W | 12W                      | 34%                  |                           |                           |                           | 14%        |                  |                              |          |
|                                                    |                          |          |                                               |                                          |                                                 |                               |                            |              | CDAI s10                | 12W                      | 34%                      | 14%                  |                           |                           |                           |            |                  |                              |          |
|                                                    |                          |          |                                               |                                          |                                                 |                               |                            |              | SDAI s11                | 12W                      | 35%                      | 14%                  |                           |                           |                           |            |                  |                              |          |
|                                                    |                          |          |                                               |                                          |                                                 |                               |                            |              | HAQ-DI                  | Change from BL until 12W | 12W                      | 35%                  |                           |                           |                           | 14%        |                  |                              |          |
|                                                    |                          |          |                                               |                                          |                                                 |                               |                            |              | ACR20 response          | 12W                      | 53%                      | 34%                  |                           |                           |                           |            |                  |                              |          |
|                                                    |                          |          |                                               |                                          |                                                 |                               |                            |              | ACR50 response          | 12W                      | 24%                      | 16%                  |                           |                           |                           |            |                  |                              |          |
|                                                    |                          |          |                                               |                                          |                                                 |                               |                            |              | ACR70 response          | 12W                      | 13%                      | 4%                   |                           |                           |                           |            |                  |                              |          |
|                                                    |                          |          |                                               |                                          |                                                 |                               |                            |              | DAS28-CRP               | Change from BL until 12W | 12W                      | 34%                  |                           |                           |                           | 14%        |                  |                              |          |
|                                                    |                          |          |                                               |                                          |                                                 |                               |                            |              | CDAI s10                | 12W                      | 34%                      | 14%                  |                           |                           |                           |            |                  |                              |          |
| SDAI s11                                           | 12W                      | 35%      | 14%                                           |                                          |                                                 |                               |                            |              |                         |                          |                          |                      |                           |                           |                           |            |                  |                              |          |
| HAQ-DI                                             | Change from BL until 12W | 12W      | 35%                                           | 14%                                      |                                                 |                               |                            |              |                         |                          |                          |                      |                           |                           |                           |            |                  |                              |          |



|                                        |     |        |                                    |                                                      |                              |                                                         |                  |                  |                |                |                          |               |                |          |          |     |
|----------------------------------------|-----|--------|------------------------------------|------------------------------------------------------|------------------------------|---------------------------------------------------------|------------------|------------------|----------------|----------------|--------------------------|---------------|----------------|----------|----------|-----|
| Genovese, 2014b                        | RCT | 322    | Failure of 1 TNFI                  | DAS28-CRP 5.86; HAQ-DI 1.6                           | 7.9-10.0Y (median)           | Fostamatinib (100mg 2/D, oral)                          | 105              | Placebo          | 109            | DAS28-CRP      | Change from BL until 12W | -1.3, LSM     | -0.6, LSM      | ps0.05   | Moderate |     |
|                                        |     |        |                                    |                                                      |                              |                                                         |                  |                  |                | CDAI           | Change from BL until 12W | -15.3, LSM    | -6.4, LSM      | ps0.05   |          |     |
|                                        |     |        |                                    |                                                      |                              | Ixekizumab (180mg at W0, 1, 2, then q2w, subcutaneous)  | 59               | Placebo          | 64             | ACR20 response | 12W                      | 39%           | 23%            | ns       |          |     |
|                                        |     |        |                                    |                                                      |                              |                                                         |                  |                  |                | ACR50 response | 12W                      | 17%           | 8%             | ns       |          |     |
|                                        |     |        |                                    |                                                      |                              | Fostamatinib (100mg 2/D for 4W, then 150mg/D, oral)     | 108              | Placebo          | 109            | ACR20 response | 24W                      | 38 (36.2%)    | 23 (21.1%)     | ps<0.004 |          |     |
|                                        |     |        |                                    |                                                      |                              |                                                         |                  |                  |                | ACR50 response | 24W                      | 19 (18.1%)    | 9 (8.3%)       | ps=0.014 |          |     |
| Genovese, 2016                         | RCT | 527    | Failure of bDMARD(s)               | DAS28-ESR 5.5; SDAI 43; HAQ-DI 1.74                  | 14Y                          | Baricitinib (2mg/D, oral)                               | 174              | Placebo          | 176            | DAS28-CRP      | 24W                      | -             | -              | ps<0.001 | Moderate |     |
|                                        |     |        |                                    |                                                      |                              |                                                         |                  |                  |                | SDAI s3.3      | 24W                      | 5%            | 2%             | ns       |          |     |
|                                        |     |        |                                    |                                                      |                              | Baricitinib (4mg/D, oral)                               | 177              | Placebo          | 176            | ACR20 response | 24W                      | -             | -              | ps<0.001 |          |     |
|                                        |     |        |                                    |                                                      |                              |                                                         |                  |                  |                | DAS28-CRP      | 24W                      | -             | -              | ps<0.001 |          |     |
| Genovese, 2019                         | RCT | 448    | Failure of ≥1 bDMARD               | DAS28-CRP 5.9 (0.96); CDAI 41.2; SDAI 43.0; HAQ 1.66 | 9.8-10.3Y (range of medians) | Fingotinib (200mg/D)                                    | 148              | Placebo          | 148            | ACR20 response | 24W                      | 69.4%         | 34.5%          | ps<0.001 | Moderate |     |
|                                        |     |        |                                    |                                                      |                              |                                                         |                  |                  |                | ACR50 response | 24W                      | 45.6%         | 18.9%          | ps<0.01  |          |     |
|                                        |     |        |                                    |                                                      |                              | Fingotinib (100mg/D)                                    | 153              | Placebo          | 148            | DAS28-CRP      | Change from BL until 24W | -30.9 (13.77) | -25.4 (14.4)   | ps<0.001 |          |     |
|                                        |     |        |                                    |                                                      |                              |                                                         |                  |                  |                | CDAI           | Change from BL until 24W | -32.1 (14.41) | -24.9 (14.84)  | ps<0.05  |          |     |
| Schiff, 2015                           | RCT | 456    | Inadequate response to TNFI        | DAS28-CRP 5.87; HAQ-DI 1.67                          | 8.2Y                         | Tabalumab (120mg q4w, loading dose 240mg, subcutaneous) | 153              | Placebo          | 155            | ACR20 response | 24W                      | 54.9%         | 34.5%          | ps<0.001 | High     |     |
|                                        |     |        |                                    |                                                      |                              |                                                         |                  |                  |                | ACR50 response | 24W                      | 35.3%         | 18.9%          | ps<0.01  |          |     |
|                                        |     |        |                                    |                                                      |                              | Tabalumab (90mg q2w, loading dose 180mg, subcutaneous)  | 148              | Placebo          | 155            | ACR20 response | 24W                      | 24.3%         | 20%            | ns       |          |     |
|                                        |     |        |                                    |                                                      |                              |                                                         |                  |                  |                | ACR50 response | 24W                      | 20.3%         | 8.1%           | ps<0.01  |          |     |
| Tak, 2012                              | RCT | 836    | Inadequate response to TNFI        | DAS28 6.5; HAQ-DI 1.7                                | 12.3Y                        | Ocrelizumab (200mg at days 1 and 15 and at W24 and 26)  | 277              | Placebo          | 277            | DAS28-CRP      | Change from BL until 24W | -27.8 (13.54) | -25.4 (14.4)   | ps<0.001 | High     |     |
|                                        |     |        |                                    |                                                      |                              |                                                         |                  |                  |                | CDAI           | Change from BL until 24W | -28.8 (14.41) | -24.9 (14.84)  | ps<0.05  |          |     |
|                                        |     |        |                                    |                                                      |                              | Ocrelizumab (500mg at days 1 and 15 and at W24 and 26)  | 282              | Placebo          | 277            | ACR20 response | 48W                      | 50.7%         | 19.5%          | ps<0.001 |          |     |
|                                        |     |        |                                    |                                                      |                              |                                                         |                  |                  |                | ACR50 response | 48W                      | 20.8%         | NR             | ps<0.001 |          |     |
| van Vollenhoven, 2015                  | RCT | 27     | Insufficient response to rituximab | DAS28-CRP 5.6 (1.0)                                  | 12.6Y                        | Atacicept (150mg 1/w, subcutaneous)                     | 18               | Placebo          | 9              | DAS28-CRP      | Change from BL until 24W | -0.60 (0.66)  | -0.42 (0.60)   | ps=0.003 | High     |     |
|                                        |     |        |                                    |                                                      |                              |                                                         |                  |                  |                | CDAI           | Change from BL until 24W | -27.8 (13.54) | -25.4 (14.4)   | ps<0.05  |          |     |
|                                        |     |        |                                    |                                                      |                              |                                                         |                  |                  |                | ACR20 response | 24W                      | 17.6%         | 20%            | ns       |          |     |
|                                        |     |        |                                    |                                                      |                              |                                                         |                  |                  |                | ACR50 response | 24W                      | 24.3%         | 20%            | ns       |          |     |
|                                        |     |        |                                    |                                                      |                              |                                                         |                  |                  |                | ACR20 response | 48W                      | 48.7%         | 19.5%          | ps<0.001 |          |     |
|                                        |     |        |                                    |                                                      |                              |                                                         |                  |                  |                | ACR50 response | 48W                      | 19.3%         | NR             | ps<0.001 |          |     |
| <b>COMPARISON OF DIFFERENT bDMARDs</b> |     |        |                                    |                                                      |                              |                                                         |                  |                  |                |                |                          |               |                |          |          |     |
| <b>Comparison of different bDMARDs</b> |     |        |                                    |                                                      |                              |                                                         |                  |                  |                |                |                          |               |                |          |          |     |
| Lee, 2016                              | SLR | RCTs 4 | 1796                               | Inadequate response to TNFI                          | NR                           | NR                                                      | Tocilizumab 4mg  | Tofacitinib 10mg | ACR20 response | 24W-6M         | 1.05 (0.47-2.39)         | 10.5% (-15)   | 19.4% (-11-28) | ps<0.001 | Moderate | Low |
|                                        |     |        |                                    |                                                      |                              |                                                         | Abatacept        | Tocilizumab 4mg  | ACR20 response | 24W-6M         | 1.06 (0.46-2.28)         |               |                | ps<0.001 |          |     |
|                                        |     |        |                                    |                                                      |                              |                                                         | Abatacept        | Tocilizumab 10mg | ACR20 response | 24W-6M         | 1.10 (0.54-2.31)         |               |                | ps<0.001 |          |     |
|                                        |     |        |                                    |                                                      |                              |                                                         | Rituximab        | Abatacept        | ACR20 response | 24W-6M         | 1.14 (0.59-2.15)         |               |                | ps<0.001 |          |     |
|                                        |     |        |                                    |                                                      |                              |                                                         | Tofacitinib 10mg | Tofacitinib 5mg  | ACR20 response | 24W-6M         | 1.14 (0.71-1.86)         |               |                | ps<0.001 |          |     |
|                                        |     |        |                                    |                                                      |                              |                                                         | Rituximab        | Tocilizumab 4mg  | ACR20 response | 24W-6M         | 1.20 (0.56-2.50)         |               |                | ps<0.001 |          |     |
|                                        |     |        |                                    |                                                      |                              |                                                         | Tocilizumab 4mg  | Tofacitinib 5mg  | ACR20 response | 24W-6M         | 1.20 (0.54-2.75)         |               |                | ps<0.001 |          |     |
|                                        |     |        |                                    |                                                      |                              |                                                         | Rituximab        | Tofacitinib 10mg | ACR20 response | 24W-6M         | 1.26 (0.64-2.46)         |               |                | ps<0.001 |          |     |
|                                        |     |        |                                    |                                                      |                              |                                                         | Abatacept        | Tofacitinib 5mg  | ACR20 response | 24W-6M         | 1.26 (0.61-2.63)         |               |                | ps<0.001 |          |     |
|                                        |     |        |                                    |                                                      |                              |                                                         | Rituximab        | Tofacitinib 5mg  | ACR20 response | 24W-6M         | 1.44 (0.73-2.82)         |               |                | ps<0.001 |          |     |
|                                        |     |        |                                    |                                                      |                              |                                                         | Tocilizumab 8mg  | Rituximab        | ACR20 response | 24W-6M         | 1.92 (0.93-4.04)         |               |                | ps<0.001 |          |     |
|                                        |     |        |                                    |                                                      |                              |                                                         | Tocilizumab 8mg  | Abatacept        | ACR20 response | 24W-6M         | 2.17 (1.01-4.89)         |               |                | ps<0.001 |          |     |
|                                        |     |        |                                    |                                                      |                              |                                                         | Tocilizumab 8mg  | Tocilizumab 4mg  | ACR20 response | 24W-6M         | 2.29 (1.47-3.61)         |               |                | ps<0.001 |          |     |
|                                        |     |        |                                    |                                                      |                              |                                                         | Tocilizumab 8mg  | Tofacitinib 10mg | ACR20 response | 24W-6M         | 2.40 (1.09-5.41)         |               |                | ps<0.001 |          |     |
|                                        |     |        |                                    |                                                      |                              |                                                         | Tocilizumab 8mg  | Tofacitinib 5mg  | ACR20 response | 24W-6M         | 2.74 (1.26-6.27)         |               |                | ps<0.001 |          |     |

|              |             |                |                             |                  |                   |                  |           |                |        |                   |                                                                                                                                                                                                                                                                                                                                                                                                                                                                                                  |          |     |
|--------------|-------------|----------------|-----------------------------|------------------|-------------------|------------------|-----------|----------------|--------|-------------------|--------------------------------------------------------------------------------------------------------------------------------------------------------------------------------------------------------------------------------------------------------------------------------------------------------------------------------------------------------------------------------------------------------------------------------------------------------------------------------------------------|----------|-----|
| Vieira, 2016 | SLR; RCTs 5 | 2136           | Inadequate response to TNFI | NR               | 9.6-13.0Y (range) | Tofacitinib 5mg  | Placebo   | ACR20 response | 24W-6M | 3.30 (1.95-5.66)  | OR-1 favours tofacitinib 5mg<br>OR-1 favours tofacitinib 10mg<br>OR-1 favours tocilizumab 4mg<br>OR-1 favours abatacept<br>OR-1 favours rituximab<br>OR-1 favours tocilizumab 8mg<br><b>OR-1 favours tofacitinib; Efficacy of tofacitinib comparable with bDMARDs</b><br>OR-1 favours tofacitinib; Network meta-analysis<br>OR-1 favours tofacitinib<br>OR-1 favours tofacitinib<br>OR-1 favours tofacitinib<br>OR-1 favours tofacitinib<br>OR-1 favours tofacitinib<br>OR-1 favours tofacitinib | Moderate | Low |
|              |             |                |                             |                  |                   | Tofacitinib 10mg | Placebo   | ACR20 response | 24W-6M | 3.76 (2.24-6.50)  |                                                                                                                                                                                                                                                                                                                                                                                                                                                                                                  |          |     |
|              |             |                |                             |                  |                   | Tocilizumab 4mg  | Placebo   | ACR20 response | 24W-6M | 3.94 (2.19-7.48)  |                                                                                                                                                                                                                                                                                                                                                                                                                                                                                                  |          |     |
|              |             |                |                             |                  |                   | Abatacept        | Placebo   | ACR20 response | 24W-6M | 4.15 (2.58-7.00)  |                                                                                                                                                                                                                                                                                                                                                                                                                                                                                                  |          |     |
|              |             |                |                             |                  |                   | Rituximab        | Placebo   | ACR20 response | 24W-6M | 4.73 (3.14-7.27)  |                                                                                                                                                                                                                                                                                                                                                                                                                                                                                                  |          |     |
|              |             |                |                             |                  |                   | Tocilizumab 8mg  | Placebo   | ACR20 response | 24W-6M | 9.04 (5.15-17.08) |                                                                                                                                                                                                                                                                                                                                                                                                                                                                                                  |          |     |
|              |             |                |                             |                  |                   | Tofacitinib      | Placebo   | ACR70 response | 12W    | 3.80 (2.05-6.80)  |                                                                                                                                                                                                                                                                                                                                                                                                                                                                                                  |          |     |
|              |             |                |                             |                  |                   |                  |           | ACR70 response | 24W    | 5.77 (3.26-9.84)  |                                                                                                                                                                                                                                                                                                                                                                                                                                                                                                  |          |     |
|              |             |                |                             |                  |                   |                  | Abatacept | ACR70 response | 12W    | ns                |                                                                                                                                                                                                                                                                                                                                                                                                                                                                                                  |          |     |
|              |             |                |                             |                  |                   |                  |           | ACR70 response | 24W    | ns                |                                                                                                                                                                                                                                                                                                                                                                                                                                                                                                  |          |     |
|              | Golimimumab | ACR70 response | 14W                         | ns               |                   |                  |           |                |        |                   |                                                                                                                                                                                                                                                                                                                                                                                                                                                                                                  |          |     |
|              |             | ACR70 response | 24W                         | 1.50 (0.70-3.25) |                   |                  |           |                |        |                   |                                                                                                                                                                                                                                                                                                                                                                                                                                                                                                  |          |     |
|              | Tocilizumab | ACR70 response | 12W                         | ns               |                   |                  |           |                |        |                   |                                                                                                                                                                                                                                                                                                                                                                                                                                                                                                  |          |     |
|              |             | ACR70 response | 24W                         | ns               |                   |                  |           |                |        |                   |                                                                                                                                                                                                                                                                                                                                                                                                                                                                                                  |          |     |
|              | Rituximab   | ACR70 response | 12W                         | ns               |                   |                  |           |                |        |                   |                                                                                                                                                                                                                                                                                                                                                                                                                                                                                                  |          |     |
|              |             | ACR70 response | 24W                         | 0.53 (0.27-1.02) |                   |                  |           |                |        |                   |                                                                                                                                                                                                                                                                                                                                                                                                                                                                                                  |          |     |

|                                             |                         |      |                                                                        |    |            |                                                                                                                                                                                                                                  |                                                           |                                                                  |                                                                         |                |                              |                                                                                                                                                                  |                   |            |            |            |      |
|---------------------------------------------|-------------------------|------|------------------------------------------------------------------------|----|------------|----------------------------------------------------------------------------------------------------------------------------------------------------------------------------------------------------------------------------------|-----------------------------------------------------------|------------------------------------------------------------------|-------------------------------------------------------------------------|----------------|------------------------------|------------------------------------------------------------------------------------------------------------------------------------------------------------------|-------------------|------------|------------|------------|------|
| <b>Alternative TNFI vs alternative TNFI</b> |                         |      |                                                                        |    |            |                                                                                                                                                                                                                                  |                                                           |                                                                  |                                                                         |                |                              |                                                                                                                                                                  |                   |            |            |            |      |
| Alverini, 2009                              | SLR; RCTs 4; non-RCTs 5 | 5030 | Failure of ≥1 TNFI                                                     | NR | NR         | Adalimumab after failure of infliximab or etanercept                                                                                                                                                                             | -                                                         | -                                                                | -                                                                       | ACR70 response | 13%                          | Efficacy, irrespective of mode of action, in reaching ACR70 response ≥ 5-15% for alternative TNFI, rituximab, abatacept and tocilizumab (except in two studies). | High              | NR         |            |            |      |
|                                             |                         |      |                                                                        |    |            |                                                                                                                                                                                                                                  |                                                           |                                                                  |                                                                         |                |                              |                                                                                                                                                                  |                   |            |            |            |      |
| Chatzidionysi ou, 2013                      | Non-RCT                 | 328  | Failure of 1 TNFI                                                      | NR | 6.9Y       | DAS28 4.95 (Infliximab/adalimumab 4.87 (1.27); Etanercept 4.86 (1.21); Rituximab 5.3 (1.29); p=0.06 infliximab/adalimumab vs DAS28 4.91 (Infliximab 5.0 (±1.3); etanercept 5.1 (±1.4); adalimumab 4.7 (±1.4); p=0.001); HAQ: 1.1 | Infliximab or adalimumab                                  | 161                                                              | Etanercept                                                              | 98             | EULAR good/moderate response | 6M                                                                                                                                                               | 12 (13.8%)        | 16 (33.3%) | 38 (43.7%) | 32 (66.7%) | High |
|                                             |                         |      |                                                                        |    |            |                                                                                                                                                                                                                                  |                                                           |                                                                  |                                                                         |                |                              |                                                                                                                                                                  |                   |            |            |            |      |
| Chatzidionysi ou, 2015                      | Non-RCT                 | 952  | Failure of 1 TNFI                                                      | NR | 8.6Y       | Infliximab (no high disease activity at BL)                                                                                                                                                                                      | 31                                                        | Etanercept (no high disease activity at BL)                      | 184                                                                     | DAS28          | Change from BL until 6M      | -0.67 (1.36)                                                                                                                                                     | -1.4 (1.51)       | ns         |            |            |      |
|                                             |                         |      |                                                                        |    |            | Etanercept (no high disease activity at BL)                                                                                                                                                                                      | 184                                                       | Adalimumab (no high disease activity at BL)                      | 199                                                                     | DAS28          | Change from BL until 6M      | -0.07 (0.51)                                                                                                                                                     | -0.23 (0.41)      | ns         |            |            |      |
|                                             |                         |      |                                                                        |    |            | Adalimumab (no high disease activity at BL)                                                                                                                                                                                      | 199                                                       | Infliximab (no high disease activity at BL)                      | 31                                                                      | DAS28          | Change from BL until 6M      | -0.4 (1.3)                                                                                                                                                       | -0.6 (1.4)        | p=0.09     |            |            |      |
|                                             |                         |      |                                                                        |    |            | Infliximab (high disease activity at BL)                                                                                                                                                                                         | 28                                                        | Etanercept (high disease activity at BL)                         | 188                                                                     | DAS28          | Change from BL until 6M      | -1.8 (1.3)                                                                                                                                                       | -1.9 (1.5)        | p=0.05     |            |            |      |
|                                             |                         |      |                                                                        |    |            | Etanercept (high disease activity at BL)                                                                                                                                                                                         | 188                                                       | Adalimumab (high disease activity at BL)                         | 136                                                                     | DAS28          | Change from BL until 6M      | -1.9 (1.5)                                                                                                                                                       | -1.4 (1.6)        | p=0.05     |            |            |      |
|                                             |                         |      |                                                                        |    |            | Adalimumab (high disease activity at BL)                                                                                                                                                                                         | 136                                                       | Infliximab (high disease activity at BL)                         | 28                                                                      | DAS28          | Change from BL until 6M      | -1.4 (1.6)                                                                                                                                                       | -1.8 (1.3)        | p=0.05     |            |            |      |
|                                             |                         |      |                                                                        |    |            | Infliximab → etanercept                                                                                                                                                                                                          | 242                                                       | Infliximab → adalimumab                                          | 101                                                                     | DAS28          | Change from BL until 6M      | -1.6 (1.5)                                                                                                                                                       | -2.1 (1.6)        |            |            |            |      |
|                                             |                         |      |                                                                        |    |            | Etanercept → infliximab                                                                                                                                                                                                          | 58                                                        | Etanercept → adalimumab                                          | 329                                                                     | DAS28          | Change from BL until 6M      | -1.2 (1.6)                                                                                                                                                       | -0.7 (1.5)        |            |            |            |      |
|                                             |                         |      |                                                                        |    |            | Adalimumab → infliximab                                                                                                                                                                                                          | 16                                                        | Adalimumab → etanercept                                          | 206                                                                     | DAS28          | Change from BL until 6M      | -0.6 (0.9)                                                                                                                                                       | -1.2 (1.6)        |            |            |            |      |
|                                             |                         |      |                                                                        |    |            | Alternative TNFI (etanercept or infliximab)                                                                                                                                                                                      | 38                                                        |                                                                  |                                                                         |                |                              |                                                                                                                                                                  |                   |            |            |            |      |
| Cohen, 2005                                 | Non-RCT                 | 38   | Failure of 1 TNFI (etanercept or infliximab)                           | NR | 13.5Y      | DAS28 5.7 (1.7)                                                                                                                                                                                                                  | Infliximab to etanercept (25mg 2/W, subcutaneous)         | 24                                                               | Etanercept to infliximab (3mg/kg at W0, 2 and 4, then q8w, intravenous) | 14             | EULAR good response          | 3M                                                                                                                                                               | 15 (40%)          |            | 3.87       | High       |      |
|                                             |                         |      |                                                                        |    |            |                                                                                                                                                                                                                                  |                                                           |                                                                  |                                                                         |                |                              |                                                                                                                                                                  |                   |            |            |            |      |
| Smolen, 2016                                | RCT                     | 122  | Primary non-response to either certolizumab pegol or adalimumab at 12W | NR | HAQ-DI 1.4 | DAS28-ESR 6.0; CDAI 33.4;                                                                                                                                                                                                        | Certolizumab pegol (400mg at W0, 2 and 4, then 200mg q2w) | 57                                                               | Adalimumab (40mg q2w) + placebo at W0, 2 and 4                          | 65             | ACR20 response               | 52W                                                                                                                                                              | 33.3%             | 38.5%      | Low        |            |      |
|                                             |                         |      |                                                                        |    |            |                                                                                                                                                                                                                                  |                                                           |                                                                  |                                                                         |                |                              |                                                                                                                                                                  |                   |            |            |            |      |
|                                             |                         |      |                                                                        |    |            |                                                                                                                                                                                                                                  |                                                           |                                                                  |                                                                         |                |                              |                                                                                                                                                                  |                   |            |            |            |      |
| Zhang, 2018                                 | Non-RCT                 | 48   | Inadequate response to TNFI                                            | NR | 5.24Y      | TNFI: Intra-articular injection in knee joints                                                                                                                                                                                   | 8                                                         | TNFI: Subcutaneous injection (etanercept 2/W)                    | 20                                                                      | DAS28-ESR      | Change from BL until 4W      | (95%CI 0.04-0.38)                                                                                                                                                | (95%CI 0.29-0.57) | p=0.081    | High       |            |      |
|                                             |                         |      |                                                                        |    |            | TNFI: Intra-articular injection in knee joints                                                                                                                                                                                   | 8                                                         | TNFI: Combination of intra-articular and subcutaneous injections | 20                                                                      | DAS28-ESR      | Change from BL until 4W      | (95%CI 0.04-0.38)                                                                                                                                                | (95%CI 0.23-0.47) | p=0.182    |            |            |      |
|                                             |                         |      |                                                                        |    |            | TNFI: Subcutaneous injection (etanercept 2/W)                                                                                                                                                                                    | 20                                                        | TNFI: Combination of intra-articular and subcutaneous injections | 20                                                                      | DAS28-ESR      | Change from BL until 4W      | (95%CI 0.29-0.57)                                                                                                                                                | (95%CI 0.23-0.47) | p=0.656    |            |            |      |

|                                            |                         |      |                               |    |                 |                                                      |                                                                                  |         |                                                                                                       |                |                              |                                                                                                                                                                  |                                                                             |          |                  |                   |      |  |
|--------------------------------------------|-------------------------|------|-------------------------------|----|-----------------|------------------------------------------------------|----------------------------------------------------------------------------------|---------|-------------------------------------------------------------------------------------------------------|----------------|------------------------------|------------------------------------------------------------------------------------------------------------------------------------------------------------------|-----------------------------------------------------------------------------|----------|------------------|-------------------|------|--|
| <b>Alternative TNFI vs non-TNFI bDMARD</b> |                         |      |                               |    |                 |                                                      |                                                                                  |         |                                                                                                       |                |                              |                                                                                                                                                                  |                                                                             |          |                  |                   |      |  |
| Alverini, 2009                             | SLR; RCTs 4; non-RCTs 5 | 5030 | Failure of ≥1 TNFI            | NR | NR              | Adalimumab after failure of infliximab or etanercept | -                                                                                | -       | -                                                                                                     | ACR70 response | 13%                          | Efficacy, irrespective of mode of action, in reaching ACR70 response ≥ 5-15% for alternative TNFI, rituximab, abatacept and tocilizumab (except in two studies). | High                                                                        | NR       |                  |                   |      |  |
|                                            |                         |      |                               |    |                 |                                                      |                                                                                  |         |                                                                                                       |                |                              |                                                                                                                                                                  |                                                                             |          |                  |                   |      |  |
| Gonzalez-Vacarezza, 2014                   | SLR; RCTs 24            | 6357 | Failure of TNFI               | NR | 0.9-13Y (range) | Rituximab                                            | -                                                                                | Placebo | -                                                                                                     | ACR70 response | 10.2%                        | 1.5%                                                                                                                                                             | Appropriate to introduce tocilizumab in the coverage and remove infliximab. | Moderate | NR               |                   |      |  |
|                                            |                         |      |                               |    |                 | Rituximab                                            | -                                                                                | Placebo | -                                                                                                     | ACR70 response | 12.4%                        |                                                                                                                                                                  |                                                                             |          |                  |                   |      |  |
|                                            |                         |      |                               |    |                 | Rituximab                                            | Etanercept                                                                       |         | ACR70 response                                                                                        |                |                              |                                                                                                                                                                  |                                                                             |          |                  |                   |      |  |
|                                            |                         |      |                               |    |                 | Tocilizumab                                          | Infliximab                                                                       |         | ACR70 response                                                                                        |                |                              |                                                                                                                                                                  |                                                                             |          |                  |                   |      |  |
| Gotteberg, 2016                            | RCT                     | 300  | Insufficient response to TNFI | NR | 10.0Y           | DAS28-ESR 5.1 (1.1); HAQ 1.3 (0.6)                   | Non-TNFI biologic (abatacept 33 (23%), rituximab 41 (28%), tocilizumab 70 (48%)) | 146     | Alternative TNFI (adalimumab 57 (39%), certolizumab 23 (16%), etanercept 53 (36%), infliximab 8 (5%)) | 146            | EULAR good/moderate response | 52W                                                                                                                                                              | 78 (60%)                                                                    | 57 (43%) | 1.99 (1.22-3.25) | 17.0% (-5.1-28.9) | High |  |
|                                            |                         |      |                               |    |                 |                                                      |                                                                                  |         |                                                                                                       |                |                              |                                                                                                                                                                  |                                                                             |          |                  |                   |      |  |
|                                            |                         |      |                               |    |                 |                                                      |                                                                                  |         |                                                                                                       |                |                              |                                                                                                                                                                  |                                                                             |          |                  |                   |      |  |

|                                      |                     |                 |                 |                      |                     |                        |                                                  |                 |                 |                 |                         |                          |                                                                                             |                     |                                   |                         |                                                             |                                                                                                                                                    |                      |                                                                                                                                                                         |                                                                                                                                                                         |                                                   |                                                   |                                                                                                                                                                         |                                          |                                                   |                                                   |                                                   |                      |                                                   |
|--------------------------------------|---------------------|-----------------|-----------------|----------------------|---------------------|------------------------|--------------------------------------------------|-----------------|-----------------|-----------------|-------------------------|--------------------------|---------------------------------------------------------------------------------------------|---------------------|-----------------------------------|-------------------------|-------------------------------------------------------------|----------------------------------------------------------------------------------------------------------------------------------------------------|----------------------|-------------------------------------------------------------------------------------------------------------------------------------------------------------------------|-------------------------------------------------------------------------------------------------------------------------------------------------------------------------|---------------------------------------------------|---------------------------------------------------|-------------------------------------------------------------------------------------------------------------------------------------------------------------------------|------------------------------------------|---------------------------------------------------|---------------------------------------------------|---------------------------------------------------|----------------------|---------------------------------------------------|
| Kim, 2014                            | SLR: RCTs 6<br>1524 | Failure of TNFI | HAQ 1.6-1.9     | 9.6-21.6Y<br>(range) | Golimumab + DMARD   |                        | 153                                              | Placebo + DMARD | NR              | ACR20 response  | 6M                      | 32.1%                    | 15.5%                                                                                       | 2.577 (1.518-4.496) | -0.02 (-0.13-0.09)                | p=0.75                  | Adjusted for baseline difference                            | Switching to non-TNF biologics was more effective than cycling TNF inhibitor in TNF-IR patients; Probability (OR>1): 0.001; OR>1 favours golimumab | Moderate             | Low-Moderate                                                                                                                                                            |                                                                                                                                                                         |                                                   |                                                   |                                                                                                                                                                         |                                          |                                                   |                                                   |                                                   |                      |                                                   |
|                                      |                     |                 |                 |                      | Abatacept + DMARD   |                        |                                                  | 256             | Placebo + DMARD | NR              | ACR20 response          | 6M                       | 43.7%                                                                                       | 15.5%               |                                   |                         |                                                             |                                                                                                                                                    |                      |                                                                                                                                                                         | 4.226 (2.606-7.023)                                                                                                                                                     | Probability (OR>1): 0.028; OR>1 favours golimumab |                                                   |                                                                                                                                                                         |                                          |                                                   |                                                   |                                                   |                      |                                                   |
|                                      |                     |                 |                 |                      | Abatacept + DMARD   |                        |                                                  |                 | 256             | Placebo + DMARD | NR                      | ACR50 response           | 6M                                                                                          | 23.1%               |                                   |                         |                                                             |                                                                                                                                                    |                      |                                                                                                                                                                         | 4.2%                                                                                                                                                                    | 6.865 (2.900-20.870)                              | Probability (OR>1): 0.014; OR>1 favours golimumab |                                                                                                                                                                         |                                          |                                                   |                                                   |                                                   |                      |                                                   |
|                                      |                     |                 |                 |                      | Abatacept + DMARD   |                        |                                                  |                 |                 | 256             | Placebo + DMARD         | NR                       | ACR70 response                                                                              | 6M                  |                                   |                         |                                                             |                                                                                                                                                    |                      |                                                                                                                                                                         | 9.9%                                                                                                                                                                    | 1.3%                                              | 8.574 (2.312-56.850)                              | Probability (OR>1): 0.176; OR>1 favours abatacept                                                                                                                       |                                          |                                                   |                                                   |                                                   |                      |                                                   |
|                                      |                     |                 |                 |                      | Abatacept + DMARD   |                        |                                                  |                 |                 |                 | 256                     | Placebo + DMARD          | NR                                                                                          | HAQ                 |                                   |                         |                                                             |                                                                                                                                                    |                      |                                                                                                                                                                         | Change from BL until 6M                                                                                                                                                 |                                                   |                                                   |                                                                                                                                                                         |                                          | Probability (OR>1): 0.000; OR>1 favours golimumab |                                                   |                                                   |                      |                                                   |
|                                      |                     |                 |                 |                      | Rituximab + DMARD   |                        |                                                  |                 |                 |                 |                         | 298                      | Placebo + DMARD                                                                             | NR                  |                                   |                         |                                                             |                                                                                                                                                    |                      |                                                                                                                                                                         | ACR20 response                                                                                                                                                          | 6M                                                | 47.0%                                             | 15.5%                                                                                                                                                                   | 4.822 (3.176-7.492)                      | Probability (OR>1): 0.021; OR>1 favours abatacept |                                                   |                                                   |                      |                                                   |
|                                      |                     |                 |                 |                      | Rituximab + DMARD   |                        |                                                  |                 |                 |                 |                         |                          | 298                                                                                         | Placebo + DMARD     |                                   |                         |                                                             |                                                                                                                                                    |                      |                                                                                                                                                                         | NR                                                                                                                                                                      | ACR50 response                                    | 6M                                                | 24.0%                                                                                                                                                                   | 4.2%                                     | 7.231 (3.1812-15.490)                             | Probability (OR>1): 0.192; OR>1 favours abatacept |                                                   |                      |                                                   |
|                                      |                     |                 |                 |                      | Rituximab + DMARD   |                        |                                                  |                 |                 |                 |                         |                          |                                                                                             | 298                 |                                   |                         |                                                             |                                                                                                                                                    |                      |                                                                                                                                                                         | Placebo + DMARD                                                                                                                                                         | NR                                                | ACR70 response                                    | 6M                                                                                                                                                                      | 17.3%                                    | 1.3%                                              | 16.220 (4.575-121.800)                            | Probability (OR>1): 0.169; OR>1 favours rituximab |                      |                                                   |
|                                      |                     |                 |                 |                      | Rituximab + DMARD   |                        |                                                  |                 |                 |                 |                         |                          |                                                                                             |                     |                                   |                         |                                                             |                                                                                                                                                    |                      |                                                                                                                                                                         | 298                                                                                                                                                                     | Placebo + DMARD                                   | NR                                                | HAQ                                                                                                                                                                     | Change from BL until 6M                  |                                                   |                                                   |                                                   |                      | Probability (OR>1): 0.473; OR>1 favours rituximab |
|                                      |                     |                 |                 |                      | Tocilizumab + DMARD |                        |                                                  |                 |                 |                 |                         |                          |                                                                                             |                     |                                   |                         |                                                             |                                                                                                                                                    |                      |                                                                                                                                                                         |                                                                                                                                                                         | 170                                               | Placebo + DMARD                                   | NR                                                                                                                                                                      | ACR20 response                           | 6M                                                | 62.4%                                             | 15.5%                                             | 9.060 (5.064-17.000) | Probability (OR>1): 0.005; OR>1 favours rituximab |
|                                      |                     |                 |                 |                      | Tocilizumab + DMARD |                        |                                                  |                 |                 |                 |                         |                          |                                                                                             |                     |                                   |                         |                                                             |                                                                                                                                                    |                      |                                                                                                                                                                         |                                                                                                                                                                         |                                                   | 170                                               | Placebo + DMARD                                                                                                                                                         | NR                                       | ACR50 response                                    | 6M                                                | 32.2%                                             | 4.2%                 | 10.83 (4.731-29.690)                              |
| Tocilizumab + DMARD                  |                     | 170             | Placebo + DMARD | NR                   | ACR70 response      | 6M                     | 14.4%                                            |                 |                 |                 |                         |                          |                                                                                             |                     | 1.3%                              | 12.900 (3.474-86.120)   | Probability (OR>1): 0.611; OR>1 favours tocilizumab         |                                                                                                                                                    |                      |                                                                                                                                                                         |                                                                                                                                                                         |                                                   |                                                   |                                                                                                                                                                         |                                          |                                                   |                                                   |                                                   |                      |                                                   |
| Tocilizumab + DMARD                  |                     |                 | 170             | Placebo + DMARD      | NR                  | HAQ                    | Change from BL until 6M                          |                 |                 |                 |                         |                          |                                                                                             |                     |                                   |                         |                                                             | Probability (OR>1): 0.337; OR>1 favours tocilizumab                                                                                                |                      |                                                                                                                                                                         |                                                                                                                                                                         |                                                   |                                                   |                                                                                                                                                                         |                                          |                                                   |                                                   |                                                   |                      |                                                   |
| Golimumab + DMARD                    |                     |                 |                 | 153                  | Abatacept           | 256                    | ACR20 response                                   | 6M              | 32.1%           |                 |                         |                          |                                                                                             |                     | 43.7%                             | 1.639 (0.786-3.408)     | Probability (OR>1): 0.204; OR>1 favours tocilizumab         |                                                                                                                                                    |                      |                                                                                                                                                                         |                                                                                                                                                                         |                                                   |                                                   |                                                                                                                                                                         |                                          |                                                   |                                                   |                                                   |                      |                                                   |
| Golimumab + DMARD                    |                     |                 |                 |                      | 153                 | Abatacept              | 256                                              | ACR50 response  | 6M              | 15.7%           |                         |                          |                                                                                             |                     | 23.1%                             | 1.623 (0.454-6.247)     | Probability (OR>1): 0.907; OR>1 favours abatacept           |                                                                                                                                                    |                      |                                                                                                                                                                         |                                                                                                                                                                         |                                                   |                                                   |                                                                                                                                                                         |                                          |                                                   |                                                   |                                                   |                      |                                                   |
| Golimumab + DMARD                    |                     |                 |                 |                      |                     | 153                    | Abatacept                                        | 256             | ACR70 response  | 6M              | 5.1%                    |                          |                                                                                             |                     | 9.9%                              | 2.048 (0.361-16.470)    | Probability (OR>1): 0.772; OR>1 favours abatacept           |                                                                                                                                                    |                      |                                                                                                                                                                         |                                                                                                                                                                         |                                                   |                                                   |                                                                                                                                                                         |                                          |                                                   |                                                   |                                                   |                      |                                                   |
| Golimumab + DMARD                    |                     |                 |                 |                      |                     |                        | 153                                              | Rituximab       | 298             | HAQ             | Change from BL until 6M |                          |                                                                                             |                     |                                   |                         |                                                             | Probability (OR>1): 0.784; OR>1 favours abatacept                                                                                                  |                      |                                                                                                                                                                         |                                                                                                                                                                         |                                                   |                                                   |                                                                                                                                                                         |                                          |                                                   |                                                   |                                                   |                      |                                                   |
| Golimumab + DMARD                    |                     |                 |                 |                      |                     |                        |                                                  | 153             | Rituximab       | 298             | ACR20 response          | 6M                       | 32.1%                                                                                       |                     | 47.0%                             | 1.871 (0.937-3.725)     | Probability (OR>1): 1.000; OR>1 favours abatacept           |                                                                                                                                                    |                      |                                                                                                                                                                         |                                                                                                                                                                         |                                                   |                                                   |                                                                                                                                                                         |                                          |                                                   |                                                   |                                                   |                      |                                                   |
| Golimumab + DMARD                    |                     |                 |                 |                      |                     |                        |                                                  |                 | 153             | Rituximab       | 298                     | ACR50 response           | 6M                                                                                          | 15.7%               | 24.0%                             | 1.702 (0.558-5.087)     | Probability (OR>1): 0.962; OR>1 favours rituximab           |                                                                                                                                                    |                      |                                                                                                                                                                         |                                                                                                                                                                         |                                                   |                                                   |                                                                                                                                                                         |                                          |                                                   |                                                   |                                                   |                      |                                                   |
| Golimumab + DMARD                    |                     |                 |                 |                      |                     |                        |                                                  |                 |                 | 153             | Rituximab               | 298                      | ACR70 response                                                                              | 6M                  | 5.1%                              | 17.3%                   | 3.876 (0.685-35.370)                                        | Probability (OR>1): 0.830; OR>1 favours rituximab                                                                                                  |                      |                                                                                                                                                                         |                                                                                                                                                                         |                                                   |                                                   |                                                                                                                                                                         |                                          |                                                   |                                                   |                                                   |                      |                                                   |
| Golimumab + DMARD                    |                     |                 |                 |                      |                     |                        |                                                  |                 |                 |                 | 153                     | Tocilizumab              | 170                                                                                         | HAQ                 | Change from BL until 6M           |                         |                                                             |                                                                                                                                                    |                      | Probability (OR>1): 0.935; OR>1 favours rituximab                                                                                                                       |                                                                                                                                                                         |                                                   |                                                   |                                                                                                                                                                         |                                          |                                                   |                                                   |                                                   |                      |                                                   |
| Golimumab + DMARD                    |                     |                 |                 |                      |                     |                        |                                                  |                 |                 |                 |                         | 153                      | Tocilizumab                                                                                 | 170                 | ACR20 response                    | 6M                      | 32.1%                                                       | 62.4%                                                                                                                                              | 3.520 (1.567-7.946)  | Probability (OR>1): 0.982; OR>1 favours rituximab                                                                                                                       |                                                                                                                                                                         |                                                   |                                                   |                                                                                                                                                                         |                                          |                                                   |                                                   |                                                   |                      |                                                   |
| Golimumab + DMARD                    |                     | 153             |                 |                      |                     |                        |                                                  |                 |                 |                 |                         |                          | Tocilizumab                                                                                 | 170                 | ACR50 response                    | 6M                      | 15.7%                                                       | 32.2%                                                                                                                                              | 2.552 (0.752-9.100)  | Probability (OR>1): 0.999; OR>1 favours tocilizumab                                                                                                                     |                                                                                                                                                                         |                                                   |                                                   |                                                                                                                                                                         |                                          |                                                   |                                                   |                                                   |                      |                                                   |
| Golimumab + DMARD                    |                     |                 | 153             |                      |                     |                        |                                                  |                 |                 |                 |                         |                          | Tocilizumab                                                                                 | 170                 | ACR70 response                    | 6M                      | 5.1%                                                        | 14.4%                                                                                                                                              | 3.107 (0.532-25.490) | Probability (OR>1): 0.933; OR>1 favours tocilizumab                                                                                                                     |                                                                                                                                                                         |                                                   |                                                   |                                                                                                                                                                         |                                          |                                                   |                                                   |                                                   |                      |                                                   |
| Golimumab + DMARD                    |                     |                 |                 | 153                  |                     |                        |                                                  |                 |                 |                 |                         |                          | Tocilizumab                                                                                 | 170                 | HAQ                               | Change from BL until 6M |                                                             |                                                                                                                                                    |                      |                                                                                                                                                                         | Probability (OR>1): 0.892; OR>1 favours tocilizumab                                                                                                                     |                                                   |                                                   |                                                                                                                                                                         |                                          |                                                   |                                                   |                                                   |                      |                                                   |
| Nam, 2017                            | SLR: SLRs 2; RCTs 2 |                 |                 |                      | RCTs: 431           |                        |                                                  |                 |                 |                 |                         |                          | Failure of TNFI                                                                             | NR                  | Second TNFI or non-TNFI           | Other bDMARD            |                                                             | Efficacy                                                                                                                                           |                      |                                                                                                                                                                         |                                                                                                                                                                         |                                                   |                                                   |                                                                                                                                                                         |                                          |                                                   |                                                   | Moderate                                          | Low                  |                                                   |
| Wei, 2017                            | Non-RCT             |                 |                 |                      | 613                 | Failure of TNFI        |                                                  |                 |                 |                 |                         |                          | DAS28-ESR 3.8 (1.3)                                                                         | NR                  | Alternative TNFI (adalimumab 23%) | 332                     | bDMARD with different mechanism of action (rituximab 14.7%) | 281                                                                                                                                                | CDAI                 |                                                                                                                                                                         | Change from BL until 1Y                                                                                                                                                 | -4.81                                             | -7.54                                             |                                                                                                                                                                         | p=0.037, ns after adjustment for rNAs +† |                                                   | High                                              |                                                   |                      |                                                   |
| <b>[Alternative TNFIs abatacept]</b> |                     |                 |                 |                      |                     |                        |                                                  |                 |                 |                 |                         |                          |                                                                                             |                     |                                   |                         |                                                             |                                                                                                                                                    |                      |                                                                                                                                                                         |                                                                                                                                                                         |                                                   |                                                   |                                                                                                                                                                         |                                          |                                                   |                                                   |                                                   |                      |                                                   |
| Akiyama, 2016                        | Non-RCT             |                 |                 |                      | 63                  | Failure of tocilizumab | CDAI: 24.2 (1.5)                                 | 11.4Y (1.2)     |                 |                 |                         |                          | TNFI (19 infliximab, 3 adalimumab, 8 etanercept, 9 golimumab, 3 certolizumab-pegol) for 24W | 42                  | Abatacept for 24W                 | 21                      | CDAI≤10 (remission or LDA)                                  | 24W                                                                                                                                                | 64.3%                | 23.8%                                                                                                                                                                   |                                                                                                                                                                         |                                                   | p=0.003                                           |                                                                                                                                                                         | High                                     |                                                   |                                                   |                                                   |                      |                                                   |
| Harrold, 2015c                       | Non-RCT             |                 |                 |                      | 1177                | Failure of TNFI        | CDAI 22.1; mHAQ 0.6 (ABA 0.7, TNFI 0.6, p=0.047) | 12.5Y           | Abatacept       |                 |                         |                          | 431                                                                                         | TNFI                | 746                               | mACR20 response         | 12M                                                         |                                                                                                                                                    |                      |                                                                                                                                                                         |                                                                                                                                                                         |                                                   |                                                   | OR>1 favours abatacept; Adjusted for number of prior anti-TNF medications, baseline disease activity, rheumatoid arthritis disease severity and concomitant medications | High                                     |                                                   |                                                   |                                                   |                      |                                                   |
|                                      |                     |                 |                 |                      |                     |                        |                                                  |                 |                 |                 |                         |                          | mACR50 response                                                                             | 12M                 |                                   |                         |                                                             |                                                                                                                                                    |                      |                                                                                                                                                                         | OR>1 favours abatacept; Adjusted for number of prior anti-TNF medications, baseline disease activity, rheumatoid arthritis disease severity and concomitant medications |                                                   |                                                   |                                                                                                                                                                         |                                          |                                                   |                                                   |                                                   |                      |                                                   |
|                                      |                     |                 |                 |                      |                     |                        |                                                  |                 |                 |                 | mACR70 response         |                          | 12M                                                                                         |                     |                                   |                         |                                                             |                                                                                                                                                    |                      | OR>1 favours abatacept; Adjusted for number of prior anti-TNF medications, baseline disease activity, rheumatoid arthritis disease severity and concomitant medications |                                                                                                                                                                         |                                                   |                                                   |                                                                                                                                                                         |                                          |                                                   |                                                   |                                                   |                      |                                                   |
|                                      |                     |                 |                 |                      |                     |                        |                                                  |                 |                 |                 | mDAS                    | Change from BL until 12M |                                                                                             |                     |                                   |                         |                                                             | 1.03                                                                                                                                               | 1.03                 |                                                                                                                                                                         |                                                                                                                                                                         |                                                   | p=0.93                                            |                                                                                                                                                                         |                                          |                                                   |                                                   |                                                   |                      |                                                   |
|                                      |                     |                 |                 |                      |                     |                        |                                                  |                 |                 |                 | mCDAI                   | Change from BL until 12M |                                                                                             |                     |                                   |                         |                                                             |                                                                                                                                                    |                      |                                                                                                                                                                         |                                                                                                                                                                         |                                                   |                                                   | -1.64 (-3.47-0.19)                                                                                                                                                      |                                          |                                                   |                                                   |                                                   |                      |                                                   |

| Author, Year                         | Study Design | Failure of TNFi               | HAQ 1.6-1.9                   | 9.6-21.6Y (range)                                                                                                                                  | DMARD             | 153               | Placebo + DMARD                                                          | NR                       | ACR20 response                                      | 6M                           | 32.1%          | 15.5%              | 2.577 (1.518-4.496) | Improvement of ≥0.25 in mHAQ | 12M                         | 0.74 (0.48-1.15, -) | OR-1 favours abatacept; Adjusted for number of prior anti-TNF medications, baseline disease activity, rheumatoid arthritis disease severity and concomitant medications | Moderate                                                                                                                                                                | Low-Moderate |              |    |       |       |                        |                                                   |
|--------------------------------------|--------------|-------------------------------|-------------------------------|----------------------------------------------------------------------------------------------------------------------------------------------------|-------------------|-------------------|--------------------------------------------------------------------------|--------------------------|-----------------------------------------------------|------------------------------|----------------|--------------------|---------------------|------------------------------|-----------------------------|---------------------|-------------------------------------------------------------------------------------------------------------------------------------------------------------------------|-------------------------------------------------------------------------------------------------------------------------------------------------------------------------|--------------|--------------|----|-------|-------|------------------------|---------------------------------------------------|
| Kim, 2014                            | SLR; RCTs 6  | 1524                          | Failure of TNFi               | HAQ 1.6-1.9                                                                                                                                        | 9.6-21.6Y (range) | Golimumab + DMARD | 153                                                                      | Placebo + DMARD          | NR                                                  | ACR20 response               | 6M             | 32.1%              | 15.5%               | 2.577 (1.518-4.496)          | Change from BL until 6M     | 12M                 | 0.74 (0.48-1.15, -)                                                                                                                                                     | OR-1 favours abatacept; Adjusted for number of prior anti-TNF medications, baseline disease activity, rheumatoid arthritis disease severity and concomitant medications | Moderate     | Low-Moderate |    |       |       |                        |                                                   |
|                                      |              |                               |                               |                                                                                                                                                    |                   |                   |                                                                          |                          |                                                     | ACR50 response               | 6M             | 15.7%              | 4.2%                | 4.254 (1.947-10.550, -)      |                             |                     |                                                                                                                                                                         |                                                                                                                                                                         |              |              |    |       |       |                        |                                                   |
|                                      |              |                               |                               |                                                                                                                                                    |                   |                   |                                                                          |                          |                                                     | ACR70 response               | 6M             | 5.1%               | 1.3%                | 4.211 (1.605-13.460)         |                             |                     |                                                                                                                                                                         |                                                                                                                                                                         |              |              |    |       |       |                        |                                                   |
|                                      |              |                               |                               |                                                                                                                                                    |                   |                   |                                                                          |                          |                                                     | HAQ                          | 6M             | -0.140 (-0.255, -) |                     |                              |                             |                     |                                                                                                                                                                         |                                                                                                                                                                         |              |              |    |       |       |                        |                                                   |
|                                      |              |                               |                               |                                                                                                                                                    |                   |                   |                                                                          |                          |                                                     | Abatacept + DMARD            | 256            | Placebo + DMARD    | NR                  | ACR20 response               |                             |                     |                                                                                                                                                                         |                                                                                                                                                                         |              |              | 6M | 43.7% | 15.5% | 4.236 (2.606-7.023)    | Probability (OR-1): 0.028; OR-1 favours golimumab |
|                                      |              |                               |                               |                                                                                                                                                    |                   |                   |                                                                          |                          |                                                     |                              |                |                    |                     | ACR50 response               |                             |                     |                                                                                                                                                                         |                                                                                                                                                                         |              |              | 6M | 23.1% | 4.2%  | 6.866 (2.900-20.870)   | Probability (OR-1): 0.021; OR-1 favours abatacept |
|                                      |              |                               |                               |                                                                                                                                                    |                   |                   |                                                                          |                          |                                                     |                              |                |                    |                     | ACR70 response               |                             |                     |                                                                                                                                                                         |                                                                                                                                                                         |              |              | 6M | 9.9%  | 1.3%  | 8.574 (2.312-56.850)   | Probability (OR-1): 0.176; OR-1 favours abatacept |
|                                      |              |                               |                               |                                                                                                                                                    |                   |                   |                                                                          |                          |                                                     | HAQ                          | 6M             | -0.400 (-0.499, -) |                     |                              |                             |                     |                                                                                                                                                                         |                                                                                                                                                                         |              |              |    |       |       |                        |                                                   |
|                                      |              |                               |                               |                                                                                                                                                    |                   |                   |                                                                          |                          |                                                     | Rituximab + DMARD            | 298            | Placebo + DMARD    | NR                  | ACR20 response               |                             |                     |                                                                                                                                                                         |                                                                                                                                                                         |              |              | 6M | 47.0% | 15.5% | 4.822 (3.176-7.492)    | Probability (OR-1): 0.039; OR-1 favours rituximab |
|                                      |              |                               |                               |                                                                                                                                                    |                   |                   |                                                                          |                          |                                                     |                              |                |                    |                     | ACR50 response               |                             |                     |                                                                                                                                                                         |                                                                                                                                                                         |              |              | 6M | 24.0% | 4.2%  | 7.231 (3.1812-15.490)  | Probability (OR-1): 0.169; OR-1 favours rituximab |
|                                      |              |                               |                               |                                                                                                                                                    |                   |                   |                                                                          |                          |                                                     |                              |                |                    |                     | ACR70 response               |                             |                     |                                                                                                                                                                         |                                                                                                                                                                         |              |              | 6M | 17.3% | 1.3%  | 16.220 (4.575-121.800) | Probability (OR-1): 0.473; OR-1 favours rituximab |
|                                      |              |                               |                               |                                                                                                                                                    |                   |                   |                                                                          |                          |                                                     | HAQ                          | 6M             | -0.300 (-0.397, -) |                     |                              |                             |                     |                                                                                                                                                                         |                                                                                                                                                                         |              |              |    |       |       |                        |                                                   |
| Tocilizumab + DMARD                  | 170          | Placebo + DMARD               | NR                            | ACR20 response                                                                                                                                     | 6M                | 62.4%             | 15.5%                                                                    | 9.060 (5.064-17.000)     | Probability (OR-1): 0.939; OR-1 favours tocilizumab |                              |                |                    |                     |                              |                             |                     |                                                                                                                                                                         |                                                                                                                                                                         |              |              |    |       |       |                        |                                                   |
|                                      |              |                               |                               | ACR50 response                                                                                                                                     | 6M                | 32.2%             | 4.2%                                                                     | 10.83 (4.731-29.690)     | Probability (OR-1): 0.611; OR-1 favours tocilizumab |                              |                |                    |                     |                              |                             |                     |                                                                                                                                                                         |                                                                                                                                                                         |              |              |    |       |       |                        |                                                   |
|                                      |              |                               |                               | ACR70 response                                                                                                                                     | 6M                | 14.4%             | 1.3%                                                                     | 12.900 (3.474-86.120)    | Probability (OR-1): 0.337; OR-1 favours tocilizumab |                              |                |                    |                     |                              |                             |                     |                                                                                                                                                                         |                                                                                                                                                                         |              |              |    |       |       |                        |                                                   |
| HAQ                                  | 6M           | -0.340 (-0.453, -)            |                               |                                                                                                                                                    |                   |                   |                                                                          |                          |                                                     |                              |                |                    |                     |                              |                             |                     |                                                                                                                                                                         |                                                                                                                                                                         |              |              |    |       |       |                        |                                                   |
| Golimumab + DMARD                    | 153          | Abatacept                     | 256                           | ACR20 response                                                                                                                                     | 6M                | 32.1%             | 43.7%                                                                    | 1.639 (0.786-3.408)      | Probability (OR-1): 0.907; OR-1 favours abatacept   |                              |                |                    |                     |                              |                             |                     |                                                                                                                                                                         |                                                                                                                                                                         |              |              |    |       |       |                        |                                                   |
|                                      |              |                               |                               | ACR50 response                                                                                                                                     | 6M                | 15.7%             | 23.1%                                                                    | 1.623 (0.454-6.247)      | Probability (OR-1): 0.772; OR-1 favours abatacept   |                              |                |                    |                     |                              |                             |                     |                                                                                                                                                                         |                                                                                                                                                                         |              |              |    |       |       |                        |                                                   |
|                                      |              |                               |                               | ACR70 response                                                                                                                                     | 6M                | 5.1%              | 9.9%                                                                     | 2.048 (0.361-16.470)     | Probability (OR-1): 0.784; OR-1 favours abatacept   |                              |                |                    |                     |                              |                             |                     |                                                                                                                                                                         |                                                                                                                                                                         |              |              |    |       |       |                        |                                                   |
| HAQ                                  | 6M           | -0.260 (-0.411, -)            |                               |                                                                                                                                                    |                   |                   |                                                                          |                          |                                                     |                              |                |                    |                     |                              |                             |                     |                                                                                                                                                                         |                                                                                                                                                                         |              |              |    |       |       |                        |                                                   |
| Golimumab + DMARD                    | 153          | Rituximab                     | 298                           | ACR20 response                                                                                                                                     | 6M                | 32.1%             | 47.0%                                                                    | 1.871 (0.937-3.725)      | Probability (OR-1): 0.962; OR-1 favours rituximab   |                              |                |                    |                     |                              |                             |                     |                                                                                                                                                                         |                                                                                                                                                                         |              |              |    |       |       |                        |                                                   |
|                                      |              |                               |                               | ACR50 response                                                                                                                                     | 6M                | 15.7%             | 24.0%                                                                    | 1.702 (0.558-5.087)      | Probability (OR-1): 0.830; OR-1 favours rituximab   |                              |                |                    |                     |                              |                             |                     |                                                                                                                                                                         |                                                                                                                                                                         |              |              |    |       |       |                        |                                                   |
|                                      |              |                               |                               | ACR70 response                                                                                                                                     | 6M                | 5.1%              | 17.3%                                                                    | 3.876 (0.685-35.370)     | Probability (OR-1): 0.935; OR-1 favours rituximab   |                              |                |                    |                     |                              |                             |                     |                                                                                                                                                                         |                                                                                                                                                                         |              |              |    |       |       |                        |                                                   |
| HAQ                                  | 6M           | -0.160 (-0.310, -)            |                               |                                                                                                                                                    |                   |                   |                                                                          |                          |                                                     |                              |                |                    |                     |                              |                             |                     |                                                                                                                                                                         |                                                                                                                                                                         |              |              |    |       |       |                        |                                                   |
| Golimumab + DMARD                    | 153          | Tocilizumab                   | 170                           | ACR20 response                                                                                                                                     | 6M                | 32.1%             | 62.4%                                                                    | 3.520 (1.567-7.946)      | Probability (OR-1): 0.999; OR-1 favours tocilizumab |                              |                |                    |                     |                              |                             |                     |                                                                                                                                                                         |                                                                                                                                                                         |              |              |    |       |       |                        |                                                   |
|                                      |              |                               |                               | ACR50 response                                                                                                                                     | 6M                | 15.7%             | 32.2%                                                                    | 2.552 (0.752-9.100)      | Probability (OR-1): 0.933; OR-1 favours tocilizumab |                              |                |                    |                     |                              |                             |                     |                                                                                                                                                                         |                                                                                                                                                                         |              |              |    |       |       |                        |                                                   |
|                                      |              |                               |                               | ACR70 response                                                                                                                                     | 6M                | 5.1%              | 14.4%                                                                    | 3.107 (0.532-25.490)     | Probability (OR-1): 0.892; OR-1 favours tocilizumab |                              |                |                    |                     |                              |                             |                     |                                                                                                                                                                         |                                                                                                                                                                         |              |              |    |       |       |                        |                                                   |
| HAQ                                  | 6M           | -0.200 (-0.360, -)            |                               |                                                                                                                                                    |                   |                   |                                                                          |                          |                                                     |                              |                |                    |                     |                              |                             |                     |                                                                                                                                                                         |                                                                                                                                                                         |              |              |    |       |       |                        |                                                   |
| <b>Alternative TNFi vs rituximab</b> |              |                               |                               |                                                                                                                                                    |                   |                   |                                                                          |                          |                                                     |                              |                |                    |                     |                              |                             |                     |                                                                                                                                                                         |                                                                                                                                                                         |              |              |    |       |       |                        |                                                   |
| Brown, 2018                          | RCT          | 122                           | Failure of ≥1 TNFi            | DAS28 6.1 (1.1), CDAI 38.3 (13.31), SDAI 40.2 (14.04)                                                                                              | 6.7Y              | 41                | TNFi (etanercept, adalimumab, certolizumab pegol, golimumab, infliximab) | 41                       | Rituximab (1000mg at days 1 en 15, intravenous)     | 40                           | ACR20 response | 48W                | 54.8%               | 42.9%                        | Reduction from BL until 24W | 1.47 (0.85-2.08)    | 1.17 (0.56-1.77)                                                                                                                                                        | 0.30 (95% confidence interval (CI) -0.45 to 1.05)                                                                                                                       | p=0.436      | High         |    |       |       |                        |                                                   |
| ACR50 response                       | 48W          | 29.0%                         | 20.7%                         |                                                                                                                                                    |                   |                   |                                                                          |                          |                                                     |                              |                |                    |                     |                              |                             |                     |                                                                                                                                                                         |                                                                                                                                                                         |              |              |    |       |       |                        |                                                   |
| ACR70 response                       | 48W          | 16.1%                         | 0%                            |                                                                                                                                                    |                   |                   |                                                                          |                          |                                                     |                              |                |                    |                     |                              |                             |                     |                                                                                                                                                                         |                                                                                                                                                                         |              |              |    |       |       |                        |                                                   |
| EULAR good response                  | 48W          | 26.8%                         | 5.0%                          |                                                                                                                                                    |                   |                   |                                                                          |                          |                                                     |                              |                |                    |                     |                              |                             |                     |                                                                                                                                                                         |                                                                                                                                                                         |              |              |    |       |       |                        |                                                   |
| CDAI                                 | 48W          | 19.3 (5.7-28.8), median (IQR) | 20.3 (5.3-32.3), median (IQR) |                                                                                                                                                    |                   |                   |                                                                          |                          |                                                     |                              |                |                    |                     |                              |                             |                     |                                                                                                                                                                         |                                                                                                                                                                         |              |              |    |       |       |                        |                                                   |
| SDAI                                 | 48W          | 20.1 (7.9-27.2), median (IQR) | 20.1 (5.3-34.0), median (IQR) |                                                                                                                                                    |                   |                   |                                                                          |                          |                                                     |                              |                |                    |                     |                              |                             |                     |                                                                                                                                                                         |                                                                                                                                                                         |              |              |    |       |       |                        |                                                   |
| Chatzidionysi ou, 2013               | Non-RCT      | 328                           | Failure of 1 TNFi             | DAS28 4.95 (Infliximab/adalimumab 4.87 (1.27); Etanercept 4.86 (1.21); Rituximab 5.3 (1.29); p=0.06 infliximab/adalimumab vs rituximab), HAQ: 1.19 | 6.9Y              | Etanercept        | 98                                                                       | Rituximab                | 69                                                  | EULAR good response          | 6M             | 16 (33.3%)         | 8 (22.9%)           | Change from BL until 6M      | -1.4 (1.51)                 | -1.7 (1.18)         | ns                                                                                                                                                                      | High                                                                                                                                                                    |              |              |    |       |       |                        |                                                   |
|                                      |              |                               |                               |                                                                                                                                                    |                   |                   |                                                                          |                          |                                                     | EULAR good/moderate response | 6M             | 32 (66.7%)         | 27 (77.1%)          |                              |                             |                     |                                                                                                                                                                         |                                                                                                                                                                         |              |              |    |       |       |                        |                                                   |
|                                      |              |                               |                               |                                                                                                                                                    |                   | Rituximab         | 69                                                                       | Infliximab or adalimumab | 161                                                 | EULAR good response          | 6M             | 8 (22.9%)          | 12 (13.8%)          | Change from BL until 6M      | -0.23 (0.41)                | -0.16 (0.54)        | ns                                                                                                                                                                      |                                                                                                                                                                         |              |              |    |       |       |                        |                                                   |

| Study                    | Year                                                  | Design                  | N                       | Primary Outcome                                                                                                                                                                | Intervention                        | Comparator | Events (n/N)                           | Events (n/N)                       | OR (95% CI)             | p-value               | Notes                | Quality                 |                                                |                                                                                                                                                                                                                                                                                                                                                                                                                                                                                                                                                                                                                                                                                                                                                                                                                                                                                                                                |          |              |                                                                         |                              |                                  |            |            |  |          |      |
|--------------------------|-------------------------------------------------------|-------------------------|-------------------------|--------------------------------------------------------------------------------------------------------------------------------------------------------------------------------|-------------------------------------|------------|----------------------------------------|------------------------------------|-------------------------|-----------------------|----------------------|-------------------------|------------------------------------------------|--------------------------------------------------------------------------------------------------------------------------------------------------------------------------------------------------------------------------------------------------------------------------------------------------------------------------------------------------------------------------------------------------------------------------------------------------------------------------------------------------------------------------------------------------------------------------------------------------------------------------------------------------------------------------------------------------------------------------------------------------------------------------------------------------------------------------------------------------------------------------------------------------------------------------------|----------|--------------|-------------------------------------------------------------------------|------------------------------|----------------------------------|------------|------------|--|----------|------|
| Emery, 2015              | Non-RCT                                               | 728                     | Failure of TNFi         | (infliximab/adalimumab 1.14(0.65); Etanercept 1.14(0.62); Rituximab 1.43(0.57); p=0.007 DAS28-ESR 5.02 (Rituximab 5.2 (1.2); alternative TNFi 4.8 (1.3); p<0.0001); HAQ-DI 1.4 | Rituximab                           | 405        | Alternative TNFi                       | EULAR good/moderate response       | 6M                      | 27 (77.1%)            | 38 (43.7%)           |                         | High                                           |                                                                                                                                                                                                                                                                                                                                                                                                                                                                                                                                                                                                                                                                                                                                                                                                                                                                                                                                |          |              |                                                                         |                              |                                  |            |            |  |          |      |
|                          |                                                       |                         |                         |                                                                                                                                                                                |                                     |            |                                        | Change from BL until 6M            | 6M                      | -1.7 (1.18)           | -0.67 (1.36)         | p<0.0001                |                                                |                                                                                                                                                                                                                                                                                                                                                                                                                                                                                                                                                                                                                                                                                                                                                                                                                                                                                                                                |          |              |                                                                         |                              |                                  |            |            |  |          |      |
|                          |                                                       |                         |                         |                                                                                                                                                                                |                                     |            |                                        | Change from BL until 6M            | 6M                      | -0.16 (0.54)          | -0.07 (0.51)         | ns                      |                                                |                                                                                                                                                                                                                                                                                                                                                                                                                                                                                                                                                                                                                                                                                                                                                                                                                                                                                                                                |          |              |                                                                         |                              |                                  |            |            |  |          |      |
| Gomez-Reino, 2012        | Non-RCT                                               | 1124                    | Failure of TNFi         | DAS28 5.3 (RTX 5.5; TNFi 5.0; p<0.0001)                                                                                                                                        | Rituximab                           | 591        | Alternative TNFi                       | EULAR good/moderate response       | 12M                     | 64%                   | 60%                  |                         | High                                           |                                                                                                                                                                                                                                                                                                                                                                                                                                                                                                                                                                                                                                                                                                                                                                                                                                                                                                                                |          |              |                                                                         |                              |                                  |            |            |  |          |      |
|                          |                                                       |                         |                         |                                                                                                                                                                                |                                     |            |                                        | Change from BL until 12M           | 12M                     | -1.81 (1.60)          | -1.66 (1.49)         | ns                      |                                                |                                                                                                                                                                                                                                                                                                                                                                                                                                                                                                                                                                                                                                                                                                                                                                                                                                                                                                                                |          |              |                                                                         |                              |                                  |            |            |  |          |      |
|                          |                                                       |                         |                         |                                                                                                                                                                                |                                     |            |                                        | Change from BL until 12M           | 12M                     | -0.6 (0.2)            | -0.5 (0.2)           | p=0.007                 |                                                |                                                                                                                                                                                                                                                                                                                                                                                                                                                                                                                                                                                                                                                                                                                                                                                                                                                                                                                                |          |              |                                                                         |                              |                                  |            |            |  |          |      |
| Gonzalez-Vacarezza, 2014 | SR; RCT; 24                                           | 6357                    | Failure of TNFi         | NR                                                                                                                                                                             | Rituximab<br>Rituximab<br>Rituximab | 121<br>121 | Etanercept<br>Adalimumab<br>Etanercept | ACR50 response                     | 6M                      | 0.475 (0.253-0.892)   | 0.231 (0.0590-0.902) | 0.475 (0.253-0.892)     | 0.231 (0.0590-0.902)                           | Appropriate to introduce tocilizumab in the coverage and remove infliximab.<br>OR-1 favours rituximab<br>OR-1 favours rituximab<br>OR-1 favours rituximab<br>OR-1 favours rituximab                                                                                                                                                                                                                                                                                                                                                                                                                                                                                                                                                                                                                                                                                                                                            | Moderate | NR           |                                                                         |                              |                                  |            |            |  |          |      |
|                          |                                                       |                         |                         |                                                                                                                                                                                |                                     |            |                                        | Change from BL until 12M           | 12M                     | -1.81 (1.60)          | -1.66 (1.49)         | p=0.06                  |                                                |                                                                                                                                                                                                                                                                                                                                                                                                                                                                                                                                                                                                                                                                                                                                                                                                                                                                                                                                |          |              |                                                                         |                              |                                  |            |            |  |          |      |
|                          |                                                       |                         |                         |                                                                                                                                                                                |                                     |            |                                        | Change from BL until 12M           | 12M                     | -0.6 (0.2)            | -0.5 (0.2)           | p=0.36                  |                                                |                                                                                                                                                                                                                                                                                                                                                                                                                                                                                                                                                                                                                                                                                                                                                                                                                                                                                                                                |          |              |                                                                         |                              |                                  |            |            |  |          |      |
|                          |                                                       |                         |                         |                                                                                                                                                                                |                                     |            |                                        | Change from BL until 12M           | 12M                     | -1.81 (1.60)          | -1.55 (1.49)         | p=0.05                  |                                                |                                                                                                                                                                                                                                                                                                                                                                                                                                                                                                                                                                                                                                                                                                                                                                                                                                                                                                                                |          |              |                                                                         |                              |                                  |            |            |  |          |      |
| Harrold, 2015a           | Non-RCT                                               | 1002                    | Failure of ≥1 TNFi      | CDAI 25.8; mHAQ 0.68                                                                                                                                                           | Rituximab                           | 265        | TNFi                                   | mACR20 response                    | 1Y                      | 36.6%                 | 28.7%                | 1.66 (1.17-2.36, -)     | p=0.02                                         | OR-1 favours rituximab; Adjusted for baseline demographics,disease activity, comorbidity and medication use (past and current)<br>OR-1 favours rituximab; Adjusted for baseline demographics,disease activity, comorbidity and medication use (past and current)<br>OR-1 favours rituximab; Adjusted for baseline demographics,disease activity, comorbidity and medication use (past and current)<br>OR-1 favours rituximab; Adjusted for baseline demographics,disease activity, comorbidity and medication use (past and current)<br>OR-1 favours rituximab; Adjusted for baseline demographics,disease activity, comorbidity and medication use (past and current)<br>OR-1 favours rituximab; Adjusted for baseline demographics,disease activity, comorbidity and medication use (past and current)                                                                                                                       | High     |              |                                                                         |                              |                                  |            |            |  |          |      |
|                          |                                                       |                         |                         |                                                                                                                                                                                |                                     |            |                                        | mACR50 response                    | 1Y                      | 21.1%                 | 17.4%                | 1.53 (1.01-2.30, -)     | p=0.17                                         |                                                                                                                                                                                                                                                                                                                                                                                                                                                                                                                                                                                                                                                                                                                                                                                                                                                                                                                                |          |              |                                                                         |                              |                                  |            |            |  |          |      |
|                          |                                                       |                         |                         |                                                                                                                                                                                |                                     |            |                                        | mACR70 response                    | 1Y                      | 10.2%                 | 8.8%                 | 1.59 (0.92-2.76, -)     | p=0.46                                         |                                                                                                                                                                                                                                                                                                                                                                                                                                                                                                                                                                                                                                                                                                                                                                                                                                                                                                                                |          |              |                                                                         |                              |                                  |            |            |  |          |      |
|                          |                                                       |                         |                         |                                                                                                                                                                                |                                     |            |                                        | CDAI low disease activity/emission | 1Y                      | 34.3%                 | 33.7%                | 1.35 (0.95-1.91, -)     | p=0.82                                         |                                                                                                                                                                                                                                                                                                                                                                                                                                                                                                                                                                                                                                                                                                                                                                                                                                                                                                                                |          |              |                                                                         |                              |                                  |            |            |  |          |      |
|                          |                                                       |                         |                         |                                                                                                                                                                                |                                     |            |                                        | Improvement of ≥0.25 in mHAQ       | 1Y                      | 33.2%                 | 24.2%                | 1.46 (1.01-2.12, -)     | p=0.004                                        |                                                                                                                                                                                                                                                                                                                                                                                                                                                                                                                                                                                                                                                                                                                                                                                                                                                                                                                                |          |              |                                                                         |                              |                                  |            |            |  |          |      |
|                          |                                                       |                         |                         |                                                                                                                                                                                |                                     |            |                                        | Kekow, 2012                        | Non-RCT                 | 196                   | Failure of TNFi      | DAS28 5.5               | Rituximab (1000mg, 2-4 infusions, intravenous) |                                                                                                                                                                                                                                                                                                                                                                                                                                                                                                                                                                                                                                                                                                                                                                                                                                                                                                                                |          | 90           | Alternative TNFi (etanercept 44.3%, adalimumab 40.6%, infliximab 15.1%) | EULAR good response          | End of observation (median 189D) | 27 (30%)   | 16 (15.1%) |  | p=0.0216 | High |
|                          |                                                       |                         |                         |                                                                                                                                                                                |                                     |            |                                        |                                    |                         |                       |                      |                         |                                                |                                                                                                                                                                                                                                                                                                                                                                                                                                                                                                                                                                                                                                                                                                                                                                                                                                                                                                                                |          |              |                                                                         | EULAR good/moderate response | End of observation (median 189D) | 70 (77.8%) | 69 (65.1%) |  | p=0.0216 |      |
| DAS28-CRP                | Change from BL until end of observation (median 189D) | -1.64 (-, -1.92- -1.36) | -1.19 (-, -1.42- -0.96) | p=0.013                                                                                                                                                                        |                                     |            |                                        |                                    |                         |                       |                      |                         |                                                |                                                                                                                                                                                                                                                                                                                                                                                                                                                                                                                                                                                                                                                                                                                                                                                                                                                                                                                                |          |              |                                                                         |                              |                                  |            |            |  |          |      |
| Kim, 2014                | SR; RCT; 6                                            | 1524                    | Failure of TNFi         | HAQ 1.6-1.9                                                                                                                                                                    | Golimumab + DMARD                   | 153        | Placebo + DMARD                        | ACR20 response                     | 6M                      | 32.1%                 | 15.5%                | 2.577 (1.518-4.496)     |                                                | Switching to non-TNF biologics was more effective than cycling TNFα inhibitor in TNF-IR patients; Probability (OR>1): 0.001; OR>1 favours golimumab<br>Probability (OR<1): 0.028; OR<1 favours golimumab<br>Probability (OR<1): 0.014; OR<1 favours golimumab<br>Probability (OR<1): 0.000; OR<1 favours golimumab<br>Probability (OR<1): 0.021; OR<1 favours abatacept<br>Probability (OR<1): 0.192; OR<1 favours abatacept<br>Probability (OR<1): 0.176; OR<1 favours abatacept<br>Probability (OR<1): 0.744; OR<1 favours abatacept<br>Probability (OR<1): 0.039; OR<1 favours rituximab<br>Probability (OR<1): 0.169; OR<1 favours rituximab<br>Probability (OR<1): 0.473; OR<1 favours rituximab<br>Probability (OR<1): 0.05; OR<1 favours rituximab<br>Probability (OR<1): 0.939; OR<1 favours tocilizumab<br>Probability (OR<1): 0.611; OR<1 favours tocilizumab<br>Probability (OR<1): 0.337; OR<1 favours tocilizumab | Moderate | Low-Moderate |                                                                         |                              |                                  |            |            |  |          |      |
|                          |                                                       |                         |                         |                                                                                                                                                                                |                                     |            |                                        | ACR50 response                     | 6M                      | 15.7%                 | 4.2%                 | 4.254 (1.947-10.550, -) |                                                |                                                                                                                                                                                                                                                                                                                                                                                                                                                                                                                                                                                                                                                                                                                                                                                                                                                                                                                                |          |              |                                                                         |                              |                                  |            |            |  |          |      |
|                          |                                                       |                         |                         |                                                                                                                                                                                |                                     |            |                                        | ACR70 response                     | 6M                      | 5.1%                  | 1.3%                 | 4.211 (1.605-13.460)    |                                                |                                                                                                                                                                                                                                                                                                                                                                                                                                                                                                                                                                                                                                                                                                                                                                                                                                                                                                                                |          |              |                                                                         |                              |                                  |            |            |  |          |      |
|                          |                                                       |                         |                         |                                                                                                                                                                                |                                     |            |                                        | HAQ                                | Change from BL until 6M | -0.140 (-, -0.255, -) |                      |                         |                                                |                                                                                                                                                                                                                                                                                                                                                                                                                                                                                                                                                                                                                                                                                                                                                                                                                                                                                                                                |          |              |                                                                         |                              |                                  |            |            |  |          |      |
|                          |                                                       |                         |                         |                                                                                                                                                                                |                                     |            |                                        | Abatacept + DMARD                  | 256                     | Placebo + DMARD       | NR                   | ACR20 response          | 6M                                             |                                                                                                                                                                                                                                                                                                                                                                                                                                                                                                                                                                                                                                                                                                                                                                                                                                                                                                                                |          |              | 43.7%                                                                   | 15.5%                        | 4.226 (2.606-7.023)              |            |            |  |          |      |
|                          |                                                       |                         |                         |                                                                                                                                                                                |                                     |            |                                        | ACR50 response                     | 6M                      | 23.1%                 | 4.2%                 | 6.866 (2.900-20.870)    |                                                |                                                                                                                                                                                                                                                                                                                                                                                                                                                                                                                                                                                                                                                                                                                                                                                                                                                                                                                                |          |              |                                                                         |                              |                                  |            |            |  |          |      |
|                          |                                                       |                         |                         |                                                                                                                                                                                |                                     |            |                                        | ACR70 response                     | 6M                      | 9.9%                  | 1.3%                 | 8.574 (2.312-56.850)    |                                                |                                                                                                                                                                                                                                                                                                                                                                                                                                                                                                                                                                                                                                                                                                                                                                                                                                                                                                                                |          |              |                                                                         |                              |                                  |            |            |  |          |      |
|                          |                                                       |                         |                         |                                                                                                                                                                                |                                     |            |                                        | HAQ                                | Change from BL until 6M | -0.400 (-, -0.499, -) |                      |                         |                                                |                                                                                                                                                                                                                                                                                                                                                                                                                                                                                                                                                                                                                                                                                                                                                                                                                                                                                                                                |          |              |                                                                         |                              |                                  |            |            |  |          |      |
|                          |                                                       |                         |                         |                                                                                                                                                                                |                                     |            |                                        | Rituximab + DMARD                  | 298                     | Placebo + DMARD       | NR                   | ACR20 response          | 6M                                             |                                                                                                                                                                                                                                                                                                                                                                                                                                                                                                                                                                                                                                                                                                                                                                                                                                                                                                                                |          |              | 47.0%                                                                   | 15.5%                        | 4.822 (3.176-7.492)              |            |            |  |          |      |
|                          |                                                       |                         |                         |                                                                                                                                                                                |                                     |            |                                        | ACR50 response                     | 6M                      | 24.0%                 | 4.2%                 | 7.231 (3.1812-15.490)   |                                                |                                                                                                                                                                                                                                                                                                                                                                                                                                                                                                                                                                                                                                                                                                                                                                                                                                                                                                                                |          |              |                                                                         |                              |                                  |            |            |  |          |      |
|                          |                                                       |                         |                         |                                                                                                                                                                                |                                     |            |                                        | ACR70 response                     | 6M                      | 17.3%                 | 1.3%                 | 16.220 (4.575-121.800)  |                                                |                                                                                                                                                                                                                                                                                                                                                                                                                                                                                                                                                                                                                                                                                                                                                                                                                                                                                                                                |          |              |                                                                         |                              |                                  |            |            |  |          |      |
| HAQ                      | Change from BL until 6M                               | -0.300 (-, -0.397, -)   |                         |                                                                                                                                                                                |                                     |            |                                        |                                    |                         |                       |                      |                         |                                                |                                                                                                                                                                                                                                                                                                                                                                                                                                                                                                                                                                                                                                                                                                                                                                                                                                                                                                                                |          |              |                                                                         |                              |                                  |            |            |  |          |      |
| Tocilizumab + DMARD      | 170                                                   | Placebo + DMARD         | NR                      | ACR20 response                                                                                                                                                                 | 6M                                  | 62.4%      | 15.5%                                  | 9.060 (5.064-17.000)               |                         |                       |                      |                         |                                                |                                                                                                                                                                                                                                                                                                                                                                                                                                                                                                                                                                                                                                                                                                                                                                                                                                                                                                                                |          |              |                                                                         |                              |                                  |            |            |  |          |      |
| ACR50 response           | 6M                                                    | 32.2%                   | 4.2%                    | 10.83 (4.731-29.690)                                                                                                                                                           |                                     |            |                                        |                                    |                         |                       |                      |                         |                                                |                                                                                                                                                                                                                                                                                                                                                                                                                                                                                                                                                                                                                                                                                                                                                                                                                                                                                                                                |          |              |                                                                         |                              |                                  |            |            |  |          |      |
| ACR70 response           | 6M                                                    | 14.4%                   | 1.3%                    | 12.900 (3.474-86.120)                                                                                                                                                          |                                     |            |                                        |                                    |                         |                       |                      |                         |                                                |                                                                                                                                                                                                                                                                                                                                                                                                                                                                                                                                                                                                                                                                                                                                                                                                                                                                                                                                |          |              |                                                                         |                              |                                  |            |            |  |          |      |

| Study             | Design                                 | N                                                                                | Outcome         | Intervention                     | Comparator           | Measure                                           | Value                               | CI                                                                                                                      | OR/RR                     | CI                                                  | Notes                    | Quality          |                                                                                  |                                                                                                                                                                                                                                                              |                     |                                                                                                                                                                                                                                                              |                      |                                                     |                                                   |                   |                                                     |                   |                                                   |                                                                             |          |                |       |                           |                                                                                                                                                                                                         |                                                   |
|-------------------|----------------------------------------|----------------------------------------------------------------------------------|-----------------|----------------------------------|----------------------|---------------------------------------------------|-------------------------------------|-------------------------------------------------------------------------------------------------------------------------|---------------------------|-----------------------------------------------------|--------------------------|------------------|----------------------------------------------------------------------------------|--------------------------------------------------------------------------------------------------------------------------------------------------------------------------------------------------------------------------------------------------------------|---------------------|--------------------------------------------------------------------------------------------------------------------------------------------------------------------------------------------------------------------------------------------------------------|----------------------|-----------------------------------------------------|---------------------------------------------------|-------------------|-----------------------------------------------------|-------------------|---------------------------------------------------|-----------------------------------------------------------------------------|----------|----------------|-------|---------------------------|---------------------------------------------------------------------------------------------------------------------------------------------------------------------------------------------------------|---------------------------------------------------|
| Golimumab + DMARD | 153                                    | Abatacept                                                                        | 256             | ACR20 response                   | 6M                   | 32.1%                                             | 43.7%                               | 1.639 (0.786-3.408)                                                                                                     | -0.340 (-0.453 -)         | Probability (OR-1): 0.204; OR-1 favours tocilizumab | -                        | -                |                                                                                  |                                                                                                                                                                                                                                                              |                     |                                                                                                                                                                                                                                                              |                      |                                                     |                                                   |                   |                                                     |                   |                                                   |                                                                             |          |                |       |                           |                                                                                                                                                                                                         |                                                   |
|                   |                                        |                                                                                  |                 |                                  |                      |                                                   |                                     |                                                                                                                         |                           |                                                     |                          |                  | ACR50 response                                                                   | 6M                                                                                                                                                                                                                                                           | 15.7%               | 23.1%                                                                                                                                                                                                                                                        | 1.623 (0.454-6.247)  | Probability (OR-1): 0.907; OR-1 favours abatacept   |                                                   |                   |                                                     |                   |                                                   |                                                                             |          |                |       |                           |                                                                                                                                                                                                         |                                                   |
|                   |                                        |                                                                                  |                 |                                  |                      |                                                   |                                     |                                                                                                                         |                           |                                                     |                          |                  | ACR70 response                                                                   | 6M                                                                                                                                                                                                                                                           | 5.1%                | 9.9%                                                                                                                                                                                                                                                         | 2.048 (0.361-16.470) |                                                     | Probability (OR-1): 0.772; OR-1 favours abatacept |                   |                                                     |                   |                                                   |                                                                             |          |                |       |                           |                                                                                                                                                                                                         |                                                   |
|                   |                                        |                                                                                  |                 |                                  |                      |                                                   |                                     |                                                                                                                         |                           |                                                     |                          |                  | Change from BL until 6M                                                          |                                                                                                                                                                                                                                                              |                     |                                                                                                                                                                                                                                                              |                      |                                                     |                                                   |                   |                                                     |                   |                                                   |                                                                             |          |                |       |                           |                                                                                                                                                                                                         |                                                   |
|                   |                                        |                                                                                  |                 |                                  |                      |                                                   |                                     |                                                                                                                         |                           |                                                     |                          |                  | 153                                                                              | Rituximab                                                                                                                                                                                                                                                    | 298                 | ACR20 response                                                                                                                                                                                                                                               | 6M                   |                                                     | 32.1%                                             | 47.0%             | 1.871 (0.937-3.725)                                 | -0.260 (-0.411 -) | Probability (OR-1): 1.000; OR-1 favours abatacept | -                                                                           | -        |                |       |                           |                                                                                                                                                                                                         |                                                   |
|                   |                                        |                                                                                  |                 |                                  |                      |                                                   |                                     |                                                                                                                         |                           |                                                     |                          |                  |                                                                                  |                                                                                                                                                                                                                                                              |                     |                                                                                                                                                                                                                                                              |                      |                                                     |                                                   |                   |                                                     |                   |                                                   |                                                                             |          | ACR50 response | 6M    | 15.7%                     | 24.0%                                                                                                                                                                                                   | 1.702 (0.558-5.087)                               |
|                   | ACR70 response                         | 6M                                                                               | 5.1%            | 17.3%                            | 3.876 (0.685-35.370) | Probability (OR-1): 0.830; OR-1 favours rituximab |                                     |                                                                                                                         |                           |                                                     |                          |                  |                                                                                  |                                                                                                                                                                                                                                                              |                     |                                                                                                                                                                                                                                                              |                      |                                                     |                                                   |                   |                                                     |                   |                                                   |                                                                             |          |                |       |                           |                                                                                                                                                                                                         |                                                   |
|                   | Change from BL until 6M                |                                                                                  |                 |                                  |                      |                                                   |                                     |                                                                                                                         |                           |                                                     |                          |                  |                                                                                  |                                                                                                                                                                                                                                                              |                     |                                                                                                                                                                                                                                                              |                      |                                                     |                                                   |                   |                                                     |                   |                                                   |                                                                             |          |                |       |                           |                                                                                                                                                                                                         |                                                   |
|                   | 153                                    | Tocilizumab                                                                      | 170             | ACR20 response                   | 6M                   | 32.1%                                             | 62.4%                               | 3.520 (1.567-7.946)                                                                                                     | -0.160 (-0.310 -)         | Probability (OR-1): 0.933; OR-1 favours tocilizumab | -                        | -                |                                                                                  |                                                                                                                                                                                                                                                              |                     |                                                                                                                                                                                                                                                              |                      |                                                     |                                                   |                   |                                                     |                   |                                                   |                                                                             |          |                |       |                           |                                                                                                                                                                                                         |                                                   |
|                   |                                        |                                                                                  |                 |                                  |                      |                                                   |                                     |                                                                                                                         |                           |                                                     |                          |                  |                                                                                  |                                                                                                                                                                                                                                                              |                     |                                                                                                                                                                                                                                                              |                      | ACR50 response                                      |                                                   |                   |                                                     |                   |                                                   |                                                                             |          | 6M             | 15.7% | 32.2%                     | 2.552 (0.752-9.100)                                                                                                                                                                                     | Probability (OR-1): 0.982; OR-1 favours rituximab |
|                   |                                        |                                                                                  |                 |                                  |                      |                                                   |                                     |                                                                                                                         |                           |                                                     |                          |                  | ACR70 response                                                                   | 6M                                                                                                                                                                                                                                                           | 5.1%                | 14.4%                                                                                                                                                                                                                                                        | 3.107 (0.532-25.490) | Probability (OR-1): 0.999; OR-1 favours tocilizumab |                                                   |                   |                                                     |                   |                                                   |                                                                             |          |                |       |                           |                                                                                                                                                                                                         |                                                   |
|                   |                                        |                                                                                  |                 |                                  |                      |                                                   |                                     |                                                                                                                         |                           |                                                     |                          |                  | Change from BL until 6M                                                          |                                                                                                                                                                                                                                                              |                     |                                                                                                                                                                                                                                                              |                      |                                                     |                                                   |                   |                                                     |                   |                                                   |                                                                             |          |                |       |                           |                                                                                                                                                                                                         |                                                   |
| 387               |                                        |                                                                                  |                 |                                  |                      |                                                   |                                     |                                                                                                                         |                           |                                                     |                          |                  | Alternative TNFi                                                                 | 941                                                                                                                                                                                                                                                          | EULAR good response | 6M                                                                                                                                                                                                                                                           | 17.1%                | 13.5%                                               | -                                                 | -0.200 (-0.360 -) | Probability (OR-1): 0.993; OR-1 favours tocilizumab | -                 | -                                                 |                                                                             |          |                |       |                           |                                                                                                                                                                                                         |                                                   |
|                   |                                        |                                                                                  |                 |                                  |                      |                                                   |                                     |                                                                                                                         |                           |                                                     |                          |                  |                                                                                  |                                                                                                                                                                                                                                                              |                     |                                                                                                                                                                                                                                                              |                      |                                                     |                                                   |                   |                                                     |                   |                                                   | EULAR good/moderate response                                                | 6M       | 54.8%          | 46.3% | 1.31 (1.02-1.69, 0.04)    | Adjusted by propensity score including Disease Activity Score in 28 joints, comorbidities, the failed anti-TNF therapy, and interaction between age and reasor for switching (Response vs non-response) |                                                   |
|                   | Change from BL until 6M                |                                                                                  |                 |                                  |                      |                                                   |                                     |                                                                                                                         |                           |                                                     |                          |                  |                                                                                  |                                                                                                                                                                                                                                                              |                     |                                                                                                                                                                                                                                                              |                      |                                                     |                                                   |                   |                                                     |                   |                                                   |                                                                             |          |                |       |                           |                                                                                                                                                                                                         |                                                   |
|                   | 54                                     | Alternative TNFi (Etanercept 23 (47%); Adalimumab 16 (32%); Infliximab 10 (20%)) | 49              | EULAR good response              | 6M                   | 21.6%                                             | 25.7%                               | -                                                                                                                       | -                         | -                                                   | -                        | -                |                                                                                  |                                                                                                                                                                                                                                                              |                     |                                                                                                                                                                                                                                                              |                      |                                                     |                                                   |                   |                                                     |                   |                                                   |                                                                             |          |                |       |                           |                                                                                                                                                                                                         |                                                   |
|                   |                                        |                                                                                  |                 |                                  |                      |                                                   |                                     |                                                                                                                         |                           |                                                     |                          |                  |                                                                                  |                                                                                                                                                                                                                                                              |                     |                                                                                                                                                                                                                                                              |                      |                                                     |                                                   |                   |                                                     |                   |                                                   | EULAR good/moderate response                                                | 6M       | 64.8%          | 60.0% | -1.3 (95%CI -1.5--1.2)    | -1.2 (95%CI -1.3--1.1)                                                                                                                                                                                  | pe=0.12                                           |
|                   |                                        |                                                                                  |                 |                                  |                      |                                                   |                                     |                                                                                                                         |                           |                                                     |                          |                  |                                                                                  |                                                                                                                                                                                                                                                              |                     |                                                                                                                                                                                                                                                              |                      |                                                     |                                                   |                   |                                                     |                   |                                                   | Change from BL until 6M                                                     |          |                |       |                           |                                                                                                                                                                                                         |                                                   |
| 54                |                                        |                                                                                  |                 |                                  |                      |                                                   |                                     |                                                                                                                         |                           |                                                     |                          |                  | Alternative TNFi (Etanercept 23 (47%); Adalimumab 16 (32%); Infliximab 10 (20%)) | 49                                                                                                                                                                                                                                                           | EULAR good response | 6M                                                                                                                                                                                                                                                           | 21.6%                | 25.7%                                               | -                                                 | -                 | -                                                   | -                 | -                                                 |                                                                             |          |                |       |                           |                                                                                                                                                                                                         |                                                   |
|                   |                                        |                                                                                  |                 |                                  |                      |                                                   |                                     |                                                                                                                         |                           |                                                     |                          |                  |                                                                                  |                                                                                                                                                                                                                                                              |                     |                                                                                                                                                                                                                                                              |                      |                                                     |                                                   |                   |                                                     |                   |                                                   | EULAR good/moderate response                                                | 6M       | 64.8%          | 60.0% | -0.13 (95%CI -0.17--0.08) | -0.11 (95%CI -0.13--0.08)                                                                                                                                                                               | pe=0.51                                           |
|                   |                                        |                                                                                  |                 |                                  |                      |                                                   |                                     |                                                                                                                         |                           |                                                     |                          |                  |                                                                                  |                                                                                                                                                                                                                                                              |                     |                                                                                                                                                                                                                                                              |                      |                                                     |                                                   |                   |                                                     |                   |                                                   | Change from BL until 6M                                                     |          |                |       |                           |                                                                                                                                                                                                         |                                                   |
|                   | 54                                     | Alternative TNFi (Etanercept 23 (47%); Adalimumab 16 (32%); Infliximab 10 (20%)) | 49              | EULAR good response              | 6M                   | 21.6%                                             | 25.7%                               | -                                                                                                                       | -                         | -                                                   | -                        | -                |                                                                                  |                                                                                                                                                                                                                                                              |                     |                                                                                                                                                                                                                                                              |                      |                                                     |                                                   |                   |                                                     |                   |                                                   |                                                                             |          |                |       |                           |                                                                                                                                                                                                         |                                                   |
|                   |                                        |                                                                                  |                 |                                  |                      |                                                   |                                     |                                                                                                                         |                           |                                                     |                          |                  |                                                                                  |                                                                                                                                                                                                                                                              |                     |                                                                                                                                                                                                                                                              |                      |                                                     |                                                   |                   |                                                     |                   |                                                   | EULAR good/moderate response                                                | 6M       | 64.8%          | 60.0% | 4.2 (2.1)                 | 4.76 (1.9)                                                                                                                                                                                              | pe=0.298                                          |
|                   |                                        |                                                                                  |                 |                                  |                      |                                                   |                                     |                                                                                                                         |                           |                                                     |                          |                  |                                                                                  |                                                                                                                                                                                                                                                              |                     |                                                                                                                                                                                                                                                              |                      |                                                     |                                                   |                   |                                                     |                   |                                                   | Change from BL until 6M                                                     |          |                |       |                           |                                                                                                                                                                                                         |                                                   |
| 54                |                                        |                                                                                  |                 |                                  |                      |                                                   |                                     |                                                                                                                         |                           |                                                     |                          |                  | Alternative TNFi (Etanercept 23 (47%); Adalimumab 16 (32%); Infliximab 10 (20%)) | 49                                                                                                                                                                                                                                                           | EULAR good response | 6M                                                                                                                                                                                                                                                           | 21.6%                | 25.7%                                               | -                                                 | -                 | -                                                   | -                 | -                                                 |                                                                             |          |                |       |                           |                                                                                                                                                                                                         |                                                   |
|                   |                                        |                                                                                  |                 |                                  |                      |                                                   |                                     |                                                                                                                         |                           |                                                     |                          |                  |                                                                                  |                                                                                                                                                                                                                                                              |                     |                                                                                                                                                                                                                                                              |                      |                                                     |                                                   |                   |                                                     |                   |                                                   | EULAR good/moderate response                                                | 6M       | 64.8%          | 60.0% | 0.82 (0.68)               | 0.59 (0.69)                                                                                                                                                                                             | pe=0.960                                          |
|                   |                                        |                                                                                  |                 |                                  |                      |                                                   |                                     |                                                                                                                         |                           |                                                     |                          |                  |                                                                                  |                                                                                                                                                                                                                                                              |                     |                                                                                                                                                                                                                                                              |                      |                                                     |                                                   |                   |                                                     |                   |                                                   | Change from BL until 6M                                                     |          |                |       |                           |                                                                                                                                                                                                         |                                                   |
|                   | <b>Alternative TNFi vs tocilizumab</b> |                                                                                  |                 |                                  |                      |                                                   |                                     |                                                                                                                         |                           |                                                     |                          |                  |                                                                                  |                                                                                                                                                                                                                                                              |                     |                                                                                                                                                                                                                                                              |                      |                                                     |                                                   |                   |                                                     |                   |                                                   |                                                                             |          |                |       |                           |                                                                                                                                                                                                         |                                                   |
|                   | Gonzalez-Vacarezza, 2014               | SLR, RCTs                                                                        | 6357            | Failure of TNFi                  | NR                   | 0.9-13V (range)                                   | Rituximab                           | Etanercept                                                                                                              | ACR50 response            |                                                     | 0.475 (0.253-0.892)      | OR-1 favours RTX |                                                                                  |                                                                                                                                                                                                                                                              |                     |                                                                                                                                                                                                                                                              |                      |                                                     |                                                   |                   |                                                     |                   |                                                   | Appropriate to introduce tocilizumab in the coverage and remove infliximab. | Moderate | NR             |       |                           |                                                                                                                                                                                                         |                                                   |
|                   |                                        |                                                                                  |                 |                                  |                      |                                                   | Rituximab                           | Etanercept                                                                                                              | ACR70 response            |                                                     | 0.231 (0.0590-0.902)     | OR-1 favours RTX |                                                                                  |                                                                                                                                                                                                                                                              |                     |                                                                                                                                                                                                                                                              |                      |                                                     |                                                   |                   |                                                     |                   |                                                   |                                                                             |          |                |       |                           |                                                                                                                                                                                                         |                                                   |
| Tocilizumab       |                                        |                                                                                  |                 |                                  |                      |                                                   | Infliximab                          | ACR70 response                                                                                                          |                           | 2.42 (1.36-4.34)                                    | OR-1 favours tocilizumab |                  |                                                                                  |                                                                                                                                                                                                                                                              |                     |                                                                                                                                                                                                                                                              |                      |                                                     |                                                   |                   |                                                     |                   |                                                   |                                                                             |          |                |       |                           |                                                                                                                                                                                                         |                                                   |
| Rituximab         |                                        |                                                                                  |                 |                                  |                      |                                                   | Tocilizumab in third line treatment | ACR20 response                                                                                                          |                           | 1.79 (1.01-3.18)                                    | OR-1 favours tocilizumab |                  |                                                                                  |                                                                                                                                                                                                                                                              |                     |                                                                                                                                                                                                                                                              |                      |                                                     |                                                   |                   |                                                     |                   |                                                   |                                                                             |          |                |       |                           |                                                                                                                                                                                                         |                                                   |
| Harrold, 2018     | Non-RCT                                | 1073                                                                             | Failure of TNFi | CDAI 27.2-28.1 (range); mHAQ 0.7 | 11.5-12.9V (range)   | TNFi + MTX ≤10mg                                  | 108                                 | Tocilizumab (96% intravenously every 4 weeks; 4% subcutaneously (7 every 2 weeks, 3 every week, 2 missing information)) | 283 (trmm ed popula tion) | mACR20 response                                     | 6M                       |                  | 1.16 (0.69-1.97)                                                                 | OR-1 favours tocilizumab; Adjusted for age, sex, race (white vs. nonwhite), disabled/retired, baseline CDAI, baseline mHAQ, baseline patient pain, baseline prednisone use/dose, baseline BMI, prior biologic use, prior TNFi use, and ACR functional class. | High                |                                                                                                                                                                                                                                                              |                      |                                                     |                                                   |                   |                                                     |                   |                                                   |                                                                             |          |                |       |                           |                                                                                                                                                                                                         |                                                   |
|                   |                                        |                                                                                  |                 |                                  |                      |                                                   |                                     |                                                                                                                         |                           | mACR50 response                                     | 6M                       |                  | 1.42 (0.75-2.70)                                                                 | OR-1 favours tocilizumab; Adjusted for age, sex, race (white vs. nonwhite), disabled/retired, baseline CDAI, baseline mHAQ, baseline patient pain, baseline prednisone use/dose, baseline BMI, prior biologic use, prior TNFi use, and ACR functional class. |                     |                                                                                                                                                                                                                                                              |                      |                                                     |                                                   |                   |                                                     |                   |                                                   |                                                                             |          |                |       |                           |                                                                                                                                                                                                         |                                                   |
|                   |                                        |                                                                                  |                 |                                  |                      |                                                   |                                     |                                                                                                                         |                           | Change from BL until 6M                             |                          |                  |                                                                                  |                                                                                                                                                                                                                                                              |                     |                                                                                                                                                                                                                                                              |                      |                                                     |                                                   |                   |                                                     |                   |                                                   |                                                                             |          |                |       |                           |                                                                                                                                                                                                         |                                                   |
|                   |                                        |                                                                                  |                 |                                  |                      |                                                   |                                     |                                                                                                                         |                           | CDAI                                                | Change from BL until 6M  |                  |                                                                                  | -0.15 (-2.92-2.62)                                                                                                                                                                                                                                           |                     | OR-1 favours tocilizumab; Adjusted for age, sex, race (white vs. nonwhite), disabled/retired, baseline CDAI, baseline mHAQ, baseline patient pain, baseline prednisone use/dose, baseline BMI, prior biologic use, prior TNFi use, and ACR functional class. |                      |                                                     |                                                   |                   |                                                     |                   |                                                   |                                                                             |          |                |       |                           |                                                                                                                                                                                                         |                                                   |
|                   |                                        |                                                                                  |                 |                                  |                      |                                                   |                                     |                                                                                                                         |                           | mHAQ                                                | Change from BL until 6M  |                  |                                                                                  | -0.02 (-0.12-0.08)                                                                                                                                                                                                                                           |                     | OR-1 favours tocilizumab; Adjusted for age, sex, race (white vs. nonwhite), disabled/retired, baseline CDAI, baseline mHAQ, baseline patient pain, baseline prednisone use/dose, baseline BMI, prior biologic use, prior TNFi use, and ACR functional class. |                      |                                                     |                                                   |                   |                                                     |                   |                                                   |                                                                             |          |                |       |                           |                                                                                                                                                                                                         |                                                   |



|                |         |    |                             |     |                                                                                                                         |                          |                 |                         |    |                    |                                                                                                                                                                                                                                                              |          |     |       |       |    |      |
|----------------|---------|----|-----------------------------|-----|-------------------------------------------------------------------------------------------------------------------------|--------------------------|-----------------|-------------------------|----|--------------------|--------------------------------------------------------------------------------------------------------------------------------------------------------------------------------------------------------------------------------------------------------------|----------|-----|-------|-------|----|------|
|                |         |    | TNFi + MTX >10 to ≤15mg     | 186 | Tocilizumab (96% intravenously every 4 weeks; 4% subcutaneously (7 every 2 weeks, 3 every week, 2 missing information)) | 300 (trimmed population) | mACR20 response | 6M                      |    | 0.98 (0.63-1.52)   | OR-1 favours tocilizumab; Adjusted for age, sex, race (white vs. nonwhite), disabled/retired, baseline CDAI, baseline mHAQ, baseline patient pain, baseline prednisone use/dose, baseline BMI, prior biologic use, prior TNFi use, and ACR functional class. |          |     |       |       |    |      |
|                |         |    |                             |     |                                                                                                                         |                          | mACR50 response | 6M                      |    | 1.19 (0.70-2.03)   | OR-1 favours tocilizumab; Adjusted for age, sex, race (white vs. nonwhite), disabled/retired, baseline CDAI, baseline mHAQ, baseline patient pain, baseline prednisone use/dose, baseline BMI, prior biologic use, prior TNFi use, and ACR functional class. |          |     |       |       |    |      |
|                |         |    |                             |     |                                                                                                                         |                          | CDAI            | Change from BL until 6M |    | -0.30 (-2.83-2.22) | OR-1 favours tocilizumab; Adjusted for age, sex, race (white vs. nonwhite), disabled/retired, baseline CDAI, baseline mHAQ, baseline patient pain, baseline prednisone use/dose, baseline BMI, prior biologic use, prior TNFi use, and ACR functional class. |          |     |       |       |    |      |
|                |         |    |                             |     |                                                                                                                         |                          | mHAQ            | Change from BL until 6M |    | 0.01 (-0.07-0.09)  | OR-1 favours tocilizumab; Adjusted for age, sex, race (white vs. nonwhite), disabled/retired, baseline CDAI, baseline mHAQ, baseline patient pain, baseline prednisone use/dose, baseline BMI, prior biologic use, prior TNFi use, and ACR functional class. |          |     |       |       |    |      |
|                |         |    | TNFi + MTX >15 to ≤20mg     | 273 | Tocilizumab (96% intravenously every 4 weeks; 4% subcutaneously (7 every 2 weeks, 3 every week, 2 missing information)) | 292 (trimmed population) | mACR20 response | 6M                      |    | 1.68 (1.10-2.56)   | OR-1 favours tocilizumab; Adjusted for age, sex, race (white vs. nonwhite), disabled/retired, baseline CDAI, baseline mHAQ, baseline patient pain, baseline prednisone use/dose, baseline BMI, prior biologic use, prior TNFi use, and ACR functional class. |          |     |       |       |    |      |
|                |         |    |                             |     |                                                                                                                         |                          | mACR50 response | 6M                      |    | 1.70 (1.00-2.89)   | OR-1 favours tocilizumab; Adjusted for age, sex, race (white vs. nonwhite), disabled/retired, baseline CDAI, baseline mHAQ, baseline patient pain, baseline prednisone use/dose, baseline BMI, prior biologic use, prior TNFi use, and ACR functional class. |          |     |       |       |    |      |
|                |         |    |                             |     |                                                                                                                         |                          | CDAI            | Change from BL until 6M |    | -1.65 (-3.84-0.54) | OR-1 favours tocilizumab; Adjusted for age, sex, race (white vs. nonwhite), disabled/retired, baseline CDAI, baseline mHAQ, baseline patient pain, baseline prednisone use/dose, baseline BMI, prior biologic use, prior TNFi use, and ACR functional class. |          |     |       |       |    |      |
|                |         |    |                             |     |                                                                                                                         |                          | mHAQ            | Change from BL until 6M |    | -0.02 (-0.10-0.06) | OR-1 favours tocilizumab; Adjusted for age, sex, race (white vs. nonwhite), disabled/retired, baseline CDAI, baseline mHAQ, baseline patient pain, baseline prednisone use/dose, baseline BMI, prior biologic use, prior TNFi use, and ACR functional class. |          |     |       |       |    |      |
|                |         |    | TNFi + MTX >20mg            | 107 | Tocilizumab (96% intravenously every 4 weeks; 4% subcutaneously (7 every 2 weeks, 3 every week, 2 missing information)) | 285 (trimmed population) | mACR20 response | 6M                      |    | 0.99 (0.59-1.69)   | OR-1 favours tocilizumab; Adjusted for age, sex, race (white vs. nonwhite), disabled/retired, baseline CDAI, baseline mHAQ, baseline patient pain, baseline prednisone use/dose, baseline BMI, prior biologic use, prior TNFi use, and ACR functional class. |          |     |       |       |    |      |
|                |         |    |                             |     |                                                                                                                         |                          | mACR50 response | 6M                      |    | 1.57 (0.78-3.15)   | OR-1 favours tocilizumab; Adjusted for age, sex, race (white vs. nonwhite), disabled/retired, baseline CDAI, baseline mHAQ, baseline patient pain, baseline prednisone use/dose, baseline BMI, prior biologic use, prior TNFi use, and ACR functional class. |          |     |       |       |    |      |
|                |         |    |                             |     |                                                                                                                         |                          | CDAI            | Change from BL until 6M |    | -1.43 (-5.12-2.25) | OR-1 favours tocilizumab; Adjusted for age, sex, race (white vs. nonwhite), disabled/retired, baseline CDAI, baseline mHAQ, baseline patient pain, baseline prednisone use/dose, baseline BMI, prior biologic use, prior TNFi use, and ACR functional class. |          |     |       |       |    |      |
|                |         |    |                             |     |                                                                                                                         |                          | mHAQ            | Change from BL until 6M |    | 0.02 (-0.09-0.12)  | OR-1 favours tocilizumab; Adjusted for age, sex, race (white vs. nonwhite), disabled/retired, baseline CDAI, baseline mHAQ, baseline patient pain, baseline prednisone use/dose, baseline BMI, prior biologic use, prior TNFi use, and ACR functional class. |          |     |       |       |    |      |
| Hirabara, 2014 | Non-RCT | 89 | Inadequate efficacy of TNFi |     | DA528-CRP 4.6 (1.2); CDAI 22.4 (11.0); SDAI 24.8 (11.6)                                                                 |                          | 9.8Y            | Etanercept              | 26 | Tocilizumab        | 38                                                                                                                                                                                                                                                           | CDAI ≤10 | 52W | 70.6% | 68.2% | ns | High |

| Kim, 2014    | SLR: RCTs 6 | 1524 | Failure of TNFi                           | HAQ 1.6-1.9           | 9.6-21.6Y (range) | Golimumab + DMARD               | 153  | Placebo + DMARD                 | NR   | ACR20 response | 6M                      | 32.1% | 15.5% | 2.577 (1.518-4.496)    |                      |       | Switching to non-TNF biologics was more effective than cycling TNFi inhibitor in TNF-IR patients. Probability (OR-1): 0.001; OR-1 favours golimumab<br>Probability (OR-1): 0.028; OR-1 favours golimumab<br>Probability (OR-1): 0.014; OR-1 favours golimumab<br>Probability (OR-1): 0.000; OR-1 favours golimumab<br>Probability (OR-1): 0.021; OR-1 favours abatacept<br>Probability (OR-1): 0.192; OR-1 favours abatacept<br>Probability (OR-1): 0.176; OR-1 favours abatacept<br>Probability (OR-1): 0.744; OR-1 favours abatacept<br>Probability (OR-1): 0.039; OR-1 favours rituximab<br>Probability (OR-1): 0.169; OR-1 favours rituximab<br>Probability (OR-1): 0.473; OR-1 favours rituximab<br>Probability (OR-1): 0.05; OR-1 favours rituximab<br>Probability (OR-1): 0.939; OR-1 favours tocilizumab<br>Probability (OR-1): 0.611; OR-1 favours tocilizumab<br>Probability (OR-1): 0.337; OR-1 favours tocilizumab<br>Probability (OR-1): 0.204; OR-1 favours tocilizumab<br>Probability (OR-1): 0.907; OR-1 favours abatacept<br>Probability (OR-1): 0.772; OR-1 favours abatacept<br>Probability (OR-1): 0.784; OR-1 favours abatacept<br>Probability (OR-1): 1.000; OR-1 favours abatacept<br>Probability (OR-1): 0.962; OR-1 favours rituximab<br>Probability (OR-1): 0.830; OR-1 favours rituximab<br>Probability (OR-1): 0.935; OR-1 favours rituximab<br>Probability (OR-1): 0.982; OR-1 favours rituximab<br>Probability (OR-1): 0.999; OR-1 favours tocilizumab<br>Probability (OR-1): 0.933; OR-1 favours tocilizumab<br>Probability (OR-1): 0.892; OR-1 favours tocilizumab<br>Probability (OR-1): 0.993; OR-1 favours tocilizumab | Moderate | Low-Moderate |
|--------------|-------------|------|-------------------------------------------|-----------------------|-------------------|---------------------------------|------|---------------------------------|------|----------------|-------------------------|-------|-------|------------------------|----------------------|-------|-----------------------------------------------------------------------------------------------------------------------------------------------------------------------------------------------------------------------------------------------------------------------------------------------------------------------------------------------------------------------------------------------------------------------------------------------------------------------------------------------------------------------------------------------------------------------------------------------------------------------------------------------------------------------------------------------------------------------------------------------------------------------------------------------------------------------------------------------------------------------------------------------------------------------------------------------------------------------------------------------------------------------------------------------------------------------------------------------------------------------------------------------------------------------------------------------------------------------------------------------------------------------------------------------------------------------------------------------------------------------------------------------------------------------------------------------------------------------------------------------------------------------------------------------------------------------------------------------------------------------------------------------------------|----------|--------------|
|              |             |      |                                           |                       |                   |                                 |      |                                 |      | ACR50 response | 6M                      | 15.7% | 4.2%  | 4.254 (1.947-10.550,-) |                      |       |                                                                                                                                                                                                                                                                                                                                                                                                                                                                                                                                                                                                                                                                                                                                                                                                                                                                                                                                                                                                                                                                                                                                                                                                                                                                                                                                                                                                                                                                                                                                                                                                                                                           |          |              |
|              |             |      |                                           |                       |                   |                                 |      |                                 |      | ACR70 response | 6M                      | 5.1%  | 1.3%  | 4.211 (1.605-13.460)   |                      |       |                                                                                                                                                                                                                                                                                                                                                                                                                                                                                                                                                                                                                                                                                                                                                                                                                                                                                                                                                                                                                                                                                                                                                                                                                                                                                                                                                                                                                                                                                                                                                                                                                                                           |          |              |
|              |             |      |                                           |                       |                   |                                 |      |                                 |      | HAQ            | Change from BL until 6M |       |       |                        | -0.140 [-, -0.255 -] |       |                                                                                                                                                                                                                                                                                                                                                                                                                                                                                                                                                                                                                                                                                                                                                                                                                                                                                                                                                                                                                                                                                                                                                                                                                                                                                                                                                                                                                                                                                                                                                                                                                                                           |          |              |
|              |             |      |                                           |                       |                   | Abatacept + DMARD               | 256  | Placebo + DMARD                 | NR   | ACR20 response | 6M                      | 43.7% | 15.5% | 4.226 (2.606-7.023)    |                      |       |                                                                                                                                                                                                                                                                                                                                                                                                                                                                                                                                                                                                                                                                                                                                                                                                                                                                                                                                                                                                                                                                                                                                                                                                                                                                                                                                                                                                                                                                                                                                                                                                                                                           |          |              |
|              |             |      |                                           |                       |                   |                                 |      |                                 |      | ACR50 response | 6M                      | 23.1% | 4.2%  | 5.865 (2.900-20.870)   |                      |       |                                                                                                                                                                                                                                                                                                                                                                                                                                                                                                                                                                                                                                                                                                                                                                                                                                                                                                                                                                                                                                                                                                                                                                                                                                                                                                                                                                                                                                                                                                                                                                                                                                                           |          |              |
|              |             |      |                                           |                       |                   |                                 |      |                                 |      | ACR70 response | 6M                      | 9.9%  | 1.3%  | 8.574 (2.312-56.850)   |                      |       |                                                                                                                                                                                                                                                                                                                                                                                                                                                                                                                                                                                                                                                                                                                                                                                                                                                                                                                                                                                                                                                                                                                                                                                                                                                                                                                                                                                                                                                                                                                                                                                                                                                           |          |              |
|              |             |      |                                           |                       |                   |                                 |      |                                 |      | HAQ            | Change from BL until 6M |       |       |                        | -0.400 [-, -0.499 -] |       |                                                                                                                                                                                                                                                                                                                                                                                                                                                                                                                                                                                                                                                                                                                                                                                                                                                                                                                                                                                                                                                                                                                                                                                                                                                                                                                                                                                                                                                                                                                                                                                                                                                           |          |              |
|              |             |      |                                           |                       |                   | Rituximab + DMARD               | 298  | Placebo + DMARD                 | NR   | ACR20 response | 6M                      | 47.0% | 15.5% | 4.822 (3.176-7.492)    |                      |       |                                                                                                                                                                                                                                                                                                                                                                                                                                                                                                                                                                                                                                                                                                                                                                                                                                                                                                                                                                                                                                                                                                                                                                                                                                                                                                                                                                                                                                                                                                                                                                                                                                                           |          |              |
|              |             |      |                                           |                       |                   |                                 |      |                                 |      | ACR50 response | 6M                      | 24.0% | 4.2%  | 7.231 (3.1812-15.490)  |                      |       |                                                                                                                                                                                                                                                                                                                                                                                                                                                                                                                                                                                                                                                                                                                                                                                                                                                                                                                                                                                                                                                                                                                                                                                                                                                                                                                                                                                                                                                                                                                                                                                                                                                           |          |              |
|              |             |      |                                           |                       |                   |                                 |      |                                 |      | ACR70 response | 6M                      | 17.3% | 1.3%  | 16.220 (4.575-121.800) |                      |       |                                                                                                                                                                                                                                                                                                                                                                                                                                                                                                                                                                                                                                                                                                                                                                                                                                                                                                                                                                                                                                                                                                                                                                                                                                                                                                                                                                                                                                                                                                                                                                                                                                                           |          |              |
|              |             |      |                                           |                       |                   |                                 |      |                                 |      | HAQ            | Change from BL until 6M |       |       |                        | -0.300 [-, -0.397 -] |       |                                                                                                                                                                                                                                                                                                                                                                                                                                                                                                                                                                                                                                                                                                                                                                                                                                                                                                                                                                                                                                                                                                                                                                                                                                                                                                                                                                                                                                                                                                                                                                                                                                                           |          |              |
|              |             |      |                                           |                       |                   | Tocilizumab + DMARD             | 170  | Placebo + DMARD                 | NR   | ACR20 response | 6M                      | 62.4% | 15.5% | 9.060 (5.064-17.000)   |                      |       |                                                                                                                                                                                                                                                                                                                                                                                                                                                                                                                                                                                                                                                                                                                                                                                                                                                                                                                                                                                                                                                                                                                                                                                                                                                                                                                                                                                                                                                                                                                                                                                                                                                           |          |              |
|              |             |      |                                           |                       |                   |                                 |      |                                 |      | ACR50 response | 6M                      | 32.2% | 4.2%  | 10.83 (4.731-29.690)   |                      |       |                                                                                                                                                                                                                                                                                                                                                                                                                                                                                                                                                                                                                                                                                                                                                                                                                                                                                                                                                                                                                                                                                                                                                                                                                                                                                                                                                                                                                                                                                                                                                                                                                                                           |          |              |
|              |             |      |                                           |                       |                   |                                 |      |                                 |      | ACR70 response | 6M                      | 14.4% | 1.3%  | 12.900 (3.474-86.120)  |                      |       |                                                                                                                                                                                                                                                                                                                                                                                                                                                                                                                                                                                                                                                                                                                                                                                                                                                                                                                                                                                                                                                                                                                                                                                                                                                                                                                                                                                                                                                                                                                                                                                                                                                           |          |              |
|              |             |      |                                           |                       |                   |                                 |      |                                 |      | HAQ            | Change from BL until 6M |       |       |                        | -0.340 [-, -0.453 -] |       |                                                                                                                                                                                                                                                                                                                                                                                                                                                                                                                                                                                                                                                                                                                                                                                                                                                                                                                                                                                                                                                                                                                                                                                                                                                                                                                                                                                                                                                                                                                                                                                                                                                           |          |              |
|              |             |      |                                           |                       |                   | Golimumab + DMARD               | 153  | Abatacept                       | 256  | ACR20 response | 6M                      | 32.1% | 43.7% | 1.639 (0.786-3.408)    |                      |       |                                                                                                                                                                                                                                                                                                                                                                                                                                                                                                                                                                                                                                                                                                                                                                                                                                                                                                                                                                                                                                                                                                                                                                                                                                                                                                                                                                                                                                                                                                                                                                                                                                                           |          |              |
|              |             |      |                                           |                       |                   |                                 |      |                                 |      | ACR50 response | 6M                      | 15.7% | 23.1% | 1.623 (0.454-6.247)    |                      |       |                                                                                                                                                                                                                                                                                                                                                                                                                                                                                                                                                                                                                                                                                                                                                                                                                                                                                                                                                                                                                                                                                                                                                                                                                                                                                                                                                                                                                                                                                                                                                                                                                                                           |          |              |
|              |             |      |                                           |                       |                   |                                 |      |                                 |      | ACR70 response | 6M                      | 5.1%  | 9.9%  | 2.048 (0.361-16.470)   |                      |       |                                                                                                                                                                                                                                                                                                                                                                                                                                                                                                                                                                                                                                                                                                                                                                                                                                                                                                                                                                                                                                                                                                                                                                                                                                                                                                                                                                                                                                                                                                                                                                                                                                                           |          |              |
|              |             |      |                                           |                       |                   |                                 |      |                                 |      | HAQ            | Change from BL until 6M |       |       |                        | -0.260 [-, -0.411 -] |       |                                                                                                                                                                                                                                                                                                                                                                                                                                                                                                                                                                                                                                                                                                                                                                                                                                                                                                                                                                                                                                                                                                                                                                                                                                                                                                                                                                                                                                                                                                                                                                                                                                                           |          |              |
|              |             |      |                                           |                       |                   | Golimumab + DMARD               | 153  | Rituximab                       | 298  | ACR20 response | 6M                      | 32.1% | 47.0% | 1.871 (0.937-3.725)    |                      |       |                                                                                                                                                                                                                                                                                                                                                                                                                                                                                                                                                                                                                                                                                                                                                                                                                                                                                                                                                                                                                                                                                                                                                                                                                                                                                                                                                                                                                                                                                                                                                                                                                                                           |          |              |
|              |             |      |                                           |                       |                   |                                 |      |                                 |      | ACR50 response | 6M                      | 15.7% | 24.0% | 1.702 (0.558-5.087)    |                      |       |                                                                                                                                                                                                                                                                                                                                                                                                                                                                                                                                                                                                                                                                                                                                                                                                                                                                                                                                                                                                                                                                                                                                                                                                                                                                                                                                                                                                                                                                                                                                                                                                                                                           |          |              |
|              |             |      |                                           |                       |                   |                                 |      |                                 |      | ACR70 response | 6M                      | 5.1%  | 17.3% | 3.876 (0.685-35.370)   |                      |       |                                                                                                                                                                                                                                                                                                                                                                                                                                                                                                                                                                                                                                                                                                                                                                                                                                                                                                                                                                                                                                                                                                                                                                                                                                                                                                                                                                                                                                                                                                                                                                                                                                                           |          |              |
|              |             |      |                                           |                       |                   |                                 |      |                                 |      | HAQ            | Change from BL until 6M |       |       |                        | -0.160 [-, -0.310 -] |       |                                                                                                                                                                                                                                                                                                                                                                                                                                                                                                                                                                                                                                                                                                                                                                                                                                                                                                                                                                                                                                                                                                                                                                                                                                                                                                                                                                                                                                                                                                                                                                                                                                                           |          |              |
|              |             |      |                                           |                       |                   | Golimumab + DMARD               | 153  | Tocilizumab                     | 170  | ACR20 response | 6M                      | 32.1% | 62.4% | 3.520 (1.567-7.946)    |                      |       |                                                                                                                                                                                                                                                                                                                                                                                                                                                                                                                                                                                                                                                                                                                                                                                                                                                                                                                                                                                                                                                                                                                                                                                                                                                                                                                                                                                                                                                                                                                                                                                                                                                           |          |              |
|              |             |      |                                           |                       |                   |                                 |      |                                 |      | ACR50 response | 6M                      | 15.7% | 32.2% | 2.552 (0.752-9.100)    |                      |       |                                                                                                                                                                                                                                                                                                                                                                                                                                                                                                                                                                                                                                                                                                                                                                                                                                                                                                                                                                                                                                                                                                                                                                                                                                                                                                                                                                                                                                                                                                                                                                                                                                                           |          |              |
|              |             |      |                                           |                       |                   |                                 |      |                                 |      | ACR70 response | 6M                      | 5.1%  | 14.4% | 3.107 (0.532-25.490)   |                      |       |                                                                                                                                                                                                                                                                                                                                                                                                                                                                                                                                                                                                                                                                                                                                                                                                                                                                                                                                                                                                                                                                                                                                                                                                                                                                                                                                                                                                                                                                                                                                                                                                                                                           |          |              |
|              |             |      |                                           |                       |                   |                                 |      |                                 |      | HAQ            | Change from BL until 6M |       |       |                        | -0.200 [-, -0.360 -] |       |                                                                                                                                                                                                                                                                                                                                                                                                                                                                                                                                                                                                                                                                                                                                                                                                                                                                                                                                                                                                                                                                                                                                                                                                                                                                                                                                                                                                                                                                                                                                                                                                                                                           |          |              |
| Lauper, 2018 | Non-RCT     | 8608 | Failure of bDMARD (not further specified) | DAS28 4.2; CDAI 23.75 | 8.95Y             | Tocilizumab monotherapy         | 771  | TNF combination therapy         | 4660 | CDAI           | Change from BL until 1Y |       |       |                        | -3.54                | -3.68 | Coeff 0.17 (95%CI -1.33-1.66, p=0.83), adjusted by age, gender, disease duration, seropositivity, number of previous bDMARDs, GCs at BL, HAQ at BL                                                                                                                                                                                                                                                                                                                                                                                                                                                                                                                                                                                                                                                                                                                                                                                                                                                                                                                                                                                                                                                                                                                                                                                                                                                                                                                                                                                                                                                                                                        | High     |              |
|              |             |      |                                           |                       |                   | TNF monotherapy                 | 1404 | TNF combination therapy         | 4660 | CDAI           | Change from BL until 1Y |       |       |                        | -3.58                | -3.68 | Coeff -0.23 (95%CI -1.06-0.60, p=0.59), adjusted by age, gender, disease duration, seropositivity, number of previous bDMARDs, GCs at BL, HAQ at BL                                                                                                                                                                                                                                                                                                                                                                                                                                                                                                                                                                                                                                                                                                                                                                                                                                                                                                                                                                                                                                                                                                                                                                                                                                                                                                                                                                                                                                                                                                       |          |              |
|              |             |      |                                           |                       |                   | Tocilizumab monotherapy         | 771  | Tocilizumab combination therapy | 1773 | CDAI           | Change from BL until 1Y |       |       |                        | -3.54                | -3.34 | Coeff -0.21 (95%CI -1.24-0.83, p=0.70), adjusted by age, gender, disease duration, seropositivity, number of previous bDMARDs, GCs at BL, HAQ at BL                                                                                                                                                                                                                                                                                                                                                                                                                                                                                                                                                                                                                                                                                                                                                                                                                                                                                                                                                                                                                                                                                                                                                                                                                                                                                                                                                                                                                                                                                                       |          |              |
|              |             |      |                                           |                       |                   | Tocilizumab monotherapy         | 771  | TNF monotherapy                 | 1404 | CDAI           | Change from BL until 1Y |       |       |                        | -3.54                | -3.58 | Coeff -0.47 (95%CI -1.60-0.66, p=0.41), adjusted by age, gender, disease duration, seropositivity, number of previous bDMARDs, GCs at BL, HAQ at BL                                                                                                                                                                                                                                                                                                                                                                                                                                                                                                                                                                                                                                                                                                                                                                                                                                                                                                                                                                                                                                                                                                                                                                                                                                                                                                                                                                                                                                                                                                       |          |              |
|              |             |      |                                           |                       |                   | Tocilizumab combination therapy | 1773 | TNF combination therapy         | 4660 | CDAI           | Change from BL until 1Y |       |       |                        | -3.34                | -3.68 | Coeff 0.09 (95%CI -0.56-0.74, p=0.79), adjusted by age, gender, disease duration, seropositivity, number of previous bDMARDs, GCs at BL, HAQ at BL                                                                                                                                                                                                                                                                                                                                                                                                                                                                                                                                                                                                                                                                                                                                                                                                                                                                                                                                                                                                                                                                                                                                                                                                                                                                                                                                                                                                                                                                                                        |          |              |

|                                 |             | Tocilizumab combination therapy |                               | 1773                                                                         | TNF i monotherapy             | 1404                                                                                               | CDAI | Change from BL until 1Y                                           |      | -3.34                                                                                              | -3.58                                         | Coeff 0.21 (95%CI -0.74-1.16, p=0.67), adjusted by age, gender, disease duration, seropositivity, number of previous bDMARDs, GCs at BL, HAQ at BL |                             | High                                                                                                                                                                    |                        |         |      |
|---------------------------------|-------------|---------------------------------|-------------------------------|------------------------------------------------------------------------------|-------------------------------|----------------------------------------------------------------------------------------------------|------|-------------------------------------------------------------------|------|----------------------------------------------------------------------------------------------------|-----------------------------------------------|----------------------------------------------------------------------------------------------------------------------------------------------------|-----------------------------|-------------------------------------------------------------------------------------------------------------------------------------------------------------------------|------------------------|---------|------|
| <b>Vial, 2017<sup>a</sup></b>   | Non-RCT     | 152                             | Failure of rituximab          | DAS28-ESR 4.8 (1.3)                                                          | NR                            | TNFI                                                                                               | 47   | Tocilizumab                                                       | 57   | EULAR good/moderate response                                                                       | 12M                                           | 7 (70%)                                                                                                                                            | 21 (75%)                    | p=0.95                                                                                                                                                                  | High                   |         |      |
| <b>Walker, 2015</b>             | Non-RCT     | 265                             | Failure of rituximab          | DAS28-ESR 5.7, median; CDAI 25.1, median; HAQ-DI 1.38-1.56, range of medians | 12.0Y                         | TNFI                                                                                               | 89   | Tocilizumab                                                       | 86   | DAS28-ESR<br>EULAR good response<br>DAS28-ESR<br>CDAI<br>HAQ-DI                                    | 12M<br>6M                                     | 31%                                                                                                                                                | 65%                         | p=0.04<br>p<0.001<br>p<0.001<br>p<0.01<br>p=0.63                                                                                                                        | High                   |         |      |
| <b>Abatacept vs rituximab</b>   |             |                                 |                               |                                                                              |                               |                                                                                                    |      |                                                                   |      |                                                                                                    |                                               |                                                                                                                                                    |                             |                                                                                                                                                                         |                        |         |      |
| <b>Brown, 2018</b>              | RCT         | 122                             | Failure of ≥1 TNFI            | DAS28 6.1 (1.1), CDAI 38.3 (13.31); SDAI 40.2 (14.04)                        | 6.7Y                          | Abatacept (125mg/W, subcutaneous)                                                                  | 41   | Rituximab (1000mg at days 1 en 15, intravenous)                   | 40   | ACR20 response<br>ACR50 response<br>ACR70 response<br>EULAR good response<br>DAS28<br>CDAI<br>SDAI | 48W<br>48W<br>48W<br>48W<br>24W<br>48W<br>48W | 35.5%<br>18.8%<br>12.5%<br>4.9%                                                                                                                    | 42.9%<br>20.7%<br>0<br>5.0% | 1.20 (0.62-1.78)<br>1.17 (0.56-1.77)<br>0.04 (-0.72-0.79)                                                                                                               | p=0.927                | High    |      |
| <b>Gottenberg, 2019</b>         | non-RCT     | 3162                            | Failure of ≥1 TNFI            | DAS28-ESR 5.35                                                               | 10.0-12.0Y (range of medians) | Abatacept                                                                                          | 620  | Rituximab                                                         | 1548 | EULAR good/moderate response                                                                       | 24M                                           | 125 (22.7%)                                                                                                                                        | 322 (34.6%)                 | 0.55 (0.19-0.78)                                                                                                                                                        | OR-1 favours abatacept | High    |      |
| <b>Lee, 2016</b>                | SLR: RCTs 4 | 1796                            | Inadequate response to TNFI   | NR                                                                           | NR                            | Tocilizumab 4mg                                                                                    |      | Tofacitinib 10mg                                                  |      | ACR20 response                                                                                     | 24W-6M                                        | 1.05 (0.47-2.39)                                                                                                                                   |                             | OR-1 favours tocilizumab 4mg; Tocilizumab highest performance regarding early good response based on ACR 20 response, followed by rituximab, abatacept and tofacitinib. | Moderate               | Low     |      |
|                                 |             |                                 |                               |                                                                              |                               | Abatacept                                                                                          |      | Tocilizumab 4mg                                                   |      | ACR20 response                                                                                     | 24W-6M                                        | 1.06 (0.46-2.28)                                                                                                                                   |                             | OR-1 favours abatacept                                                                                                                                                  |                        |         |      |
|                                 |             |                                 |                               |                                                                              |                               | Abatacept                                                                                          |      | Tofacitinib 10mg                                                  |      | ACR20 response                                                                                     | 24W-6M                                        | 1.10 (0.54-2.31)                                                                                                                                   |                             | OR-1 favours abatacept                                                                                                                                                  |                        |         |      |
|                                 |             |                                 |                               |                                                                              |                               | Rituximab                                                                                          |      | Abatacept                                                         |      | ACR20 response                                                                                     | 24W-6M                                        | 1.14 (0.59-2.15)                                                                                                                                   |                             | OR-1 favours rituximab                                                                                                                                                  |                        |         |      |
|                                 |             |                                 |                               |                                                                              |                               | Tofacitinib 10mg                                                                                   |      | Rituximab                                                         |      | ACR20 response                                                                                     | 24W-6M                                        | 1.14 (0.71-1.86)                                                                                                                                   |                             | OR-1 favours tofacitinib 10mg                                                                                                                                           |                        |         |      |
|                                 |             |                                 |                               |                                                                              |                               | Rituximab                                                                                          |      | Tocilizumab 4mg                                                   |      | ACR20 response                                                                                     | 24W-6M                                        | 1.20 (0.56-2.50)                                                                                                                                   |                             | OR-1 favours rituximab                                                                                                                                                  |                        |         |      |
|                                 |             |                                 |                               |                                                                              |                               | Tocilizumab 4mg                                                                                    |      | Tofacitinib 5mg                                                   |      | ACR20 response                                                                                     | 24W-6M                                        | 1.20 (0.54-2.75)                                                                                                                                   |                             | OR-1 favours tocilizumab 4mg                                                                                                                                            |                        |         |      |
|                                 |             |                                 |                               |                                                                              |                               | Rituximab                                                                                          |      | Tofacitinib 10mg                                                  |      | ACR20 response                                                                                     | 24W-6M                                        | 1.26 (0.64-2.46)                                                                                                                                   |                             | OR-1 favours rituximab                                                                                                                                                  |                        |         |      |
|                                 |             |                                 |                               |                                                                              |                               | Abatacept                                                                                          |      | Tofacitinib 5mg                                                   |      | ACR20 response                                                                                     | 24W-6M                                        | 1.26 (0.61-2.63)                                                                                                                                   |                             | OR-1 favours abatacept                                                                                                                                                  |                        |         |      |
|                                 |             |                                 |                               |                                                                              |                               | Rituximab                                                                                          |      | Tofacitinib 5mg                                                   |      | ACR20 response                                                                                     | 24W-6M                                        | 1.44 (0.73-2.82)                                                                                                                                   |                             | OR-1 favours rituximab                                                                                                                                                  |                        |         |      |
|                                 |             |                                 |                               |                                                                              |                               | Tocilizumab 8mg                                                                                    |      | Rituximab                                                         |      | ACR20 response                                                                                     | 24W-6M                                        | 1.92 (0.93-4.04)                                                                                                                                   |                             | OR-1 favours tocilizumab 8mg                                                                                                                                            |                        |         |      |
|                                 |             |                                 |                               |                                                                              |                               | Tocilizumab 8mg                                                                                    |      | Abatacept                                                         |      | ACR20 response                                                                                     | 24W-6M                                        | 2.17 (1.01-4.89)                                                                                                                                   |                             | OR-1 favours tocilizumab 8mg                                                                                                                                            |                        |         |      |
|                                 |             |                                 |                               |                                                                              |                               | Tocilizumab 8mg                                                                                    |      | Tocilizumab 4mg                                                   |      | ACR20 response                                                                                     | 24W-6M                                        | 2.29 (1.47-3.61)                                                                                                                                   |                             | OR-1 favours tocilizumab 8mg                                                                                                                                            |                        |         |      |
|                                 |             |                                 |                               |                                                                              |                               | Tocilizumab 8mg                                                                                    |      | Tofacitinib 10mg                                                  |      | ACR20 response                                                                                     | 24W-6M                                        | 2.40 (1.09-5.41)                                                                                                                                   |                             | OR-1 favours tocilizumab 8mg                                                                                                                                            |                        |         |      |
|                                 |             |                                 |                               |                                                                              |                               | Tocilizumab 8mg                                                                                    |      | Tofacitinib 5mg                                                   |      | ACR20 response                                                                                     | 24W-6M                                        | 2.74 (1.26-6.27)                                                                                                                                   |                             | OR-1 favours tocilizumab 8mg                                                                                                                                            |                        |         |      |
|                                 |             |                                 |                               |                                                                              |                               | Tofacitinib 5mg                                                                                    |      | Placebo                                                           |      | ACR20 response                                                                                     | 24W-6M                                        | 3.30 (1.95-5.66)                                                                                                                                   |                             | OR-1 favours tofacitinib 5mg                                                                                                                                            |                        |         |      |
|                                 |             |                                 |                               |                                                                              |                               | Tofacitinib 10mg                                                                                   |      | Placebo                                                           |      | ACR20 response                                                                                     | 24W-6M                                        | 3.76 (2.24-6.50)                                                                                                                                   |                             | OR-1 favours tofacitinib 10mg                                                                                                                                           |                        |         |      |
|                                 |             |                                 |                               |                                                                              |                               | Tocilizumab 4mg                                                                                    |      | Placebo                                                           |      | ACR20 response                                                                                     | 24W-6M                                        | 3.94 (2.19-7.48)                                                                                                                                   |                             | OR-1 favours tocilizumab 4mg                                                                                                                                            |                        |         |      |
|                                 |             |                                 |                               |                                                                              |                               | Abatacept                                                                                          |      | Placebo                                                           |      | ACR20 response                                                                                     | 24W-6M                                        | 4.15 (2.58-7.00)                                                                                                                                   |                             | OR-1 favours abatacept                                                                                                                                                  |                        |         |      |
|                                 |             |                                 |                               |                                                                              |                               | Rituximab                                                                                          |      | Placebo                                                           |      | ACR20 response                                                                                     | 24W-6M                                        | 4.73 (3.14-7.27)                                                                                                                                   |                             | OR-1 favours rituximab                                                                                                                                                  |                        |         |      |
|                                 |             |                                 |                               |                                                                              |                               | Tocilizumab 8mg                                                                                    |      | Placebo                                                           |      | ACR20 response                                                                                     | 24W-6M                                        | 9.04 (5.15-17.08)                                                                                                                                  |                             | OR-1 favours tocilizumab 8mg                                                                                                                                            |                        |         |      |
| <b>Abatacept vs tocilizumab</b> |             |                                 |                               |                                                                              |                               |                                                                                                    |      |                                                                   |      |                                                                                                    |                                               |                                                                                                                                                    |                             |                                                                                                                                                                         |                        |         |      |
| <b>Das, 2014</b>                | Non-RCT     | 51                              | Failure of rituximab          | DAS28-ESR 5.73                                                               | 12Y                           | Abatacept (<60 kg: 500 mg; ≥60 kg≤100kg: 750 mg; >100 kg: 1000 mg on days 1, 15, 29 and then q28d) | 16   | Tocilizumab (8mg/kg, q4w)                                         | 35   | DAS28-ESR                                                                                          | 6M                                            | 4.94 (0.44)                                                                                                                                        | 3.28 (0.26)                 |                                                                                                                                                                         | High                   |         |      |
| <b>Elmedany, 2019</b>           | Non-RCT     | 132                             | Failure of ≥1 TNFI            | DAS28 5.61; HAQ 0.96                                                         | 7.5Y                          | Tocilizumab 8mg                                                                                    | 68   | Abatacept (W0, 2, 4, then q4w, intravenous; <60kg 500mg, 60-100kg | 64   | DAS28-ESR at 24W HAQ at 24W                                                                        |                                               | 2.4 (0.84)                                                                                                                                         | 2.8 (0.78)                  | ns                                                                                                                                                                      | High                   |         |      |
| <b>Gottenberg, 2016</b>         | RCT         | 300                             | Insufficient response to TNFI | DAS28-ESR 5.1 (1.1); HAQ 1.3 (0.6)                                           | 10.0Y                         | Tocilizumab                                                                                        | 70   | Abatacept                                                         | 33   | EULAR good/moderate response                                                                       | 24W                                           | 56 (80%)                                                                                                                                           | 22 (67%)                    | 1.78 (0.59-5.37)                                                                                                                                                        | ns                     | High    |      |
| <b>Gottenberg, 2019</b>         | Non-RCT     | 3162                            | Failure of ≥1 TNFI            | DAS28-ESR 5.35                                                               | 10.0-12.0Y (range of medians) | Abatacept                                                                                          | 620  | Tocilizumab                                                       | 964  | EULAR good/moderate response                                                                       | 24M                                           | 125 (22.7%)                                                                                                                                        | 272 (44.2%)                 | 0.37 (0.21-0.63)                                                                                                                                                        | OR-1 favours abatacept | High    |      |
| <b>Harróld, 2016</b>            | Non-RCT     | 528                             | Failure of ≥1 TNFI            | CDAI 28.0; mHAQ 0.7 (0.5), mean (SD)                                         | 10.5Y                         | Abatacept                                                                                          | 264  | Tocilizumab                                                       | 264  | CDAI (trimmed mHAQ)                                                                                | Change from BL until 6M                       | -11.3 (14.7)                                                                                                                                       | -9.9 (14.1)                 | -1.27 (-, 3.65-1.11)                                                                                                                                                    | p=0.30                 | High    |      |
| <b>Hirabara, 2014</b>           | Non-RCT     | 89                              | Inadequate efficacy of TNFI   | DAS28-CRP 4.6 (1.2); CDAI 22.4 (11.0); SDAI 24.8 (11.6)                      | 9.8Y                          | Abatacept                                                                                          | 25   | Tocilizumab                                                       | 38   | DAS28-CRP CDAI s1D                                                                                 | 52W<br>52W                                    | 49.8%                                                                                                                                              | 68.2%                       | 3.22 (1.11)                                                                                                                                                             | 2.51 (1.12)            | p=0.016 | High |
| <b>Lee, 2016</b>                | SLR: RCTs 4 | 1796                            | Inadequate response to TNFI   | NR                                                                           | NR                            | Tocilizumab 4mg                                                                                    |      | Tofacitinib 10mg                                                  |      | ACR20 response                                                                                     | 24W-6M                                        | 1.05 (0.47-2.39)                                                                                                                                   |                             | OR-1 favours tocilizumab 4mg; Tocilizumab highest performance regarding early good response based on ACR 20 response, followed by rituximab, abatacept and tofacitinib. | Moderate               | Low     |      |
|                                 |             |                                 |                               |                                                                              |                               | Abatacept                                                                                          |      | Tocilizumab 4mg                                                   |      | ACR20 response                                                                                     | 24W-6M                                        | 1.06 (0.46-2.28)                                                                                                                                   |                             | OR-1 favours abatacept                                                                                                                                                  |                        |         |      |
|                                 |             |                                 |                               |                                                                              |                               | Abatacept                                                                                          |      | Tofacitinib 10mg                                                  |      | ACR20 response                                                                                     | 24W-6M                                        | 1.10 (0.54-2.31)                                                                                                                                   |                             | OR-1 favours abatacept                                                                                                                                                  |                        |         |      |
|                                 |             |                                 |                               |                                                                              |                               | Rituximab                                                                                          |      | Abatacept                                                         |      | ACR20 response                                                                                     | 24W-6M                                        | 1.14 (0.59-2.15)                                                                                                                                   |                             | OR-1 favours rituximab                                                                                                                                                  |                        |         |      |
|                                 |             |                                 |                               |                                                                              |                               | Tofacitinib 10mg                                                                                   |      | Rituximab                                                         |      | ACR20 response                                                                                     | 24W-6M                                        | 1.14 (0.71-1.86)                                                                                                                                   |                             | OR-1 favours tofacitinib 10mg                                                                                                                                           |                        |         |      |
|                                 |             |                                 |                               |                                                                              |                               | Rituximab                                                                                          |      | Tocilizumab 4mg                                                   |      | ACR20 response                                                                                     | 24W-6M                                        | 1.20 (0.56-2.50)                                                                                                                                   |                             | OR-1 favours rituximab                                                                                                                                                  |                        |         |      |
|                                 |             |                                 |                               |                                                                              |                               | Tocilizumab 4mg                                                                                    |      | Tofacitinib 5mg                                                   |      | ACR20 response                                                                                     | 24W-6M                                        | 1.20 (0.54-2.75)                                                                                                                                   |                             | OR-1 favours tocilizumab 4mg                                                                                                                                            |                        |         |      |
|                                 |             |                                 |                               |                                                                              |                               | Rituximab                                                                                          |      | Tofacitinib 10mg                                                  |      | ACR20 response                                                                                     | 24W-6M                                        | 1.26 (0.64-2.46)                                                                                                                                   |                             | OR-1 favours rituximab                                                                                                                                                  |                        |         |      |
|                                 |             |                                 |                               |                                                                              |                               | Abatacept                                                                                          |      | Tofacitinib 5mg                                                   |      | ACR20 response                                                                                     | 24W-6M                                        | 1.26 (0.61-2.63)                                                                                                                                   |                             | OR-1 favours abatacept                                                                                                                                                  |                        |         |      |
|                                 |             |                                 |                               |                                                                              |                               | Rituximab                                                                                          |      | Tofacitinib 5mg                                                   |      | ACR20 response                                                                                     | 24W-6M                                        | 1.44 (0.73-2.82)                                                                                                                                   |                             | OR-1 favours rituximab                                                                                                                                                  |                        |         |      |



|                                                     |             |      |                                                  |                                                        |       |                                                                                                                            |                                                                                                                           |                                                    |                                        |                                      |                                     |  |       |             |                                                                                                                                                                                                                                                                                                                                                                                                                                                                                                                                                                                                                                                              |           |                                |          |              |
|-----------------------------------------------------|-------------|------|--------------------------------------------------|--------------------------------------------------------|-------|----------------------------------------------------------------------------------------------------------------------------|---------------------------------------------------------------------------------------------------------------------------|----------------------------------------------------|----------------------------------------|--------------------------------------|-------------------------------------|--|-------|-------------|--------------------------------------------------------------------------------------------------------------------------------------------------------------------------------------------------------------------------------------------------------------------------------------------------------------------------------------------------------------------------------------------------------------------------------------------------------------------------------------------------------------------------------------------------------------------------------------------------------------------------------------------------------------|-----------|--------------------------------|----------|--------------|
| Lee, 2016                                           | SLR: RCT; 4 | 1796 | Inadequate response to TNFi                      | NR                                                     | NR    | Tocilizumab 4mg                                                                                                            | Tofacitinib 10mg                                                                                                          | ACR20 response                                     | 24W-6M                                 | 1.05 (0.47-2.39)                     |                                     |  |       |             | OR-1 favours tocilizumab 4mg; Tocilizumab highest performance regarding early good response based on ACR20 response, followed by rituximab, abatacept and tofacitinib. OR-1 favours abatacept OR-1 favours abatacept OR-1 favours rituximab OR-1 favours tofacitinib 10mg OR-1 favours rituximab OR-1 favours tocilizumab 4mg OR-1 favours rituximab OR-1 favours abatacept OR-1 favours rituximab OR-1 favours tocilizumab 8mg OR-1 favours tocilizumab 8mg OR-1 favours tocilizumab 8mg OR-1 favours tofacitinib 5mg OR-1 favours tocilizumab 10mg OR-1 favours tocilizumab 4mg OR-1 favours abatacept OR-1 favours rituximab OR-1 favours tocilizumab 8mg | Moderate  | Low                            |          |              |
|                                                     |             |      |                                                  |                                                        |       | Abatacept                                                                                                                  | Tocilizumab 4mg                                                                                                           | ACR20 response                                     | 24W-6M                                 | 1.06 (0.46-2.28)                     |                                     |  |       |             |                                                                                                                                                                                                                                                                                                                                                                                                                                                                                                                                                                                                                                                              |           |                                |          |              |
|                                                     |             |      |                                                  |                                                        |       | Abatacept                                                                                                                  | Tofacitinib 10mg                                                                                                          | ACR20 response                                     | 24W-6M                                 | 1.10 (0.54-2.31)                     |                                     |  |       |             |                                                                                                                                                                                                                                                                                                                                                                                                                                                                                                                                                                                                                                                              |           |                                |          |              |
|                                                     |             |      |                                                  |                                                        |       | Rituximab                                                                                                                  | Abatacept                                                                                                                 | ACR20 response                                     | 24W-6M                                 | 1.14 (0.59-2.15)                     |                                     |  |       |             |                                                                                                                                                                                                                                                                                                                                                                                                                                                                                                                                                                                                                                                              |           |                                |          |              |
|                                                     |             |      |                                                  |                                                        |       | Tofacitinib 10mg                                                                                                           | Tofacitinib 5mg                                                                                                           | ACR20 response                                     | 24W-6M                                 | 1.14 (0.71-1.86)                     |                                     |  |       |             |                                                                                                                                                                                                                                                                                                                                                                                                                                                                                                                                                                                                                                                              |           |                                |          |              |
|                                                     |             |      |                                                  |                                                        |       | Rituximab                                                                                                                  | Tocilizumab 4mg                                                                                                           | ACR20 response                                     | 24W-6M                                 | 1.20 (0.56-2.50)                     |                                     |  |       |             |                                                                                                                                                                                                                                                                                                                                                                                                                                                                                                                                                                                                                                                              |           |                                |          |              |
|                                                     |             |      |                                                  |                                                        |       | Tocilizumab 4mg                                                                                                            | Tofacitinib 5mg                                                                                                           | ACR20 response                                     | 24W-6M                                 | 1.20 (0.54-2.75)                     |                                     |  |       |             |                                                                                                                                                                                                                                                                                                                                                                                                                                                                                                                                                                                                                                                              |           |                                |          |              |
|                                                     |             |      |                                                  |                                                        |       | Rituximab                                                                                                                  | Tofacitinib 10mg                                                                                                          | ACR20 response                                     | 24W-6M                                 | 1.26 (0.64-2.46)                     |                                     |  |       |             |                                                                                                                                                                                                                                                                                                                                                                                                                                                                                                                                                                                                                                                              |           |                                |          |              |
|                                                     |             |      |                                                  |                                                        |       | Abatacept                                                                                                                  | Tofacitinib 5mg                                                                                                           | ACR20 response                                     | 24W-6M                                 | 1.26 (0.61-2.63)                     |                                     |  |       |             |                                                                                                                                                                                                                                                                                                                                                                                                                                                                                                                                                                                                                                                              |           |                                |          |              |
|                                                     |             |      |                                                  |                                                        |       | Rituximab                                                                                                                  | Tofacitinib 5mg                                                                                                           | ACR20 response                                     | 24W-6M                                 | 1.44 (0.73-2.82)                     |                                     |  |       |             |                                                                                                                                                                                                                                                                                                                                                                                                                                                                                                                                                                                                                                                              |           |                                |          |              |
|                                                     |             |      |                                                  |                                                        |       | Abatacept                                                                                                                  | Rituximab                                                                                                                 | ACR20 response                                     | 24W-6M                                 | 1.92 (0.93-4.04)                     |                                     |  |       |             |                                                                                                                                                                                                                                                                                                                                                                                                                                                                                                                                                                                                                                                              |           |                                |          |              |
|                                                     |             |      |                                                  |                                                        |       | Rituximab                                                                                                                  | Abatacept                                                                                                                 | ACR20 response                                     | 24W-6M                                 | 2.17 (1.01-4.89)                     |                                     |  |       |             |                                                                                                                                                                                                                                                                                                                                                                                                                                                                                                                                                                                                                                                              |           |                                |          |              |
|                                                     |             |      |                                                  |                                                        |       | Tocilizumab 8mg                                                                                                            | <b>Tocilizumab 4mg</b>                                                                                                    | <b>ACR20 response</b>                              | <b>24W-6M</b>                          | <b>2.29 (1.47-3.61)</b>              |                                     |  |       |             |                                                                                                                                                                                                                                                                                                                                                                                                                                                                                                                                                                                                                                                              |           |                                |          |              |
|                                                     |             |      |                                                  |                                                        |       | Tocilizumab 8mg                                                                                                            | Tofacitinib 10mg                                                                                                          | ACR20 response                                     | 24W-6M                                 | 2.40 (1.09-5.41)                     |                                     |  |       |             |                                                                                                                                                                                                                                                                                                                                                                                                                                                                                                                                                                                                                                                              |           |                                |          |              |
|                                                     |             |      |                                                  |                                                        |       | Tocilizumab 8mg                                                                                                            | Tofacitinib 5mg                                                                                                           | ACR20 response                                     | 24W-6M                                 | 2.74 (1.26-6.27)                     |                                     |  |       |             |                                                                                                                                                                                                                                                                                                                                                                                                                                                                                                                                                                                                                                                              |           |                                |          |              |
|                                                     |             |      |                                                  |                                                        |       | Tofacitinib 5mg                                                                                                            | Placebo                                                                                                                   | ACR20 response                                     | 24W-6M                                 | 3.30 (1.95-5.66)                     |                                     |  |       |             |                                                                                                                                                                                                                                                                                                                                                                                                                                                                                                                                                                                                                                                              |           |                                |          |              |
|                                                     |             |      |                                                  |                                                        |       | Tofacitinib 10mg                                                                                                           | Placebo                                                                                                                   | ACR20 response                                     | 24W-6M                                 | 3.76 (2.24-6.50)                     |                                     |  |       |             |                                                                                                                                                                                                                                                                                                                                                                                                                                                                                                                                                                                                                                                              |           |                                |          |              |
|                                                     |             |      |                                                  |                                                        |       | Tocilizumab 4mg                                                                                                            | Placebo                                                                                                                   | ACR20 response                                     | 24W-6M                                 | 3.94 (2.19-7.48)                     |                                     |  |       |             |                                                                                                                                                                                                                                                                                                                                                                                                                                                                                                                                                                                                                                                              |           |                                |          |              |
|                                                     |             |      |                                                  |                                                        |       | Abatacept                                                                                                                  | Placebo                                                                                                                   | ACR20 response                                     | 24W-6M                                 | 4.15 (2.58-7.00)                     |                                     |  |       |             |                                                                                                                                                                                                                                                                                                                                                                                                                                                                                                                                                                                                                                                              |           |                                |          |              |
|                                                     |             |      |                                                  |                                                        |       | Rituximab                                                                                                                  | Placebo                                                                                                                   | ACR20 response                                     | 24W-6M                                 | 4.73 (3.14-7.27)                     |                                     |  |       |             |                                                                                                                                                                                                                                                                                                                                                                                                                                                                                                                                                                                                                                                              |           |                                |          |              |
|                                                     |             |      |                                                  |                                                        |       | Tocilizumab 8mg                                                                                                            | Placebo                                                                                                                   | ACR20 response                                     | 24W-6M                                 | 9.04 (5.15-17.08)                    |                                     |  |       |             |                                                                                                                                                                                                                                                                                                                                                                                                                                                                                                                                                                                                                                                              |           |                                |          |              |
| Ogata, 2018                                         | RCT         | 41   | Inadequate response to tocilizumab intravenously | DAS28 5.7 (1.3), CDAI 33.5 (15.0)                      | 8.4Y  | Tocilizumab (162mg q1w, subcutaneous)                                                                                      | Tocilizuma(162mg q2w, subcutaneous)                                                                                       | ACR20 response<br>ACR50 response<br>ACR70 response | 12W<br>12W<br>12W                      | 11 (52.4%)<br>8 (38.1%)<br>3 (14.3%) | 4 (20.0%)<br>3 (15.0%)<br>3 (15.0%) |  |       |             |                                                                                                                                                                                                                                                                                                                                                                                                                                                                                                                                                                                                                                                              |           |                                |          |              |
|                                                     |             |      |                                                  |                                                        |       |                                                                                                                            |                                                                                                                           | Change from BL until 12W                           |                                        |                                      |                                     |  | -2.1  | -0.89       | -1.21 (-                                                                                                                                                                                                                                                                                                                                                                                                                                                                                                                                                                                                                                                     | pr=0.0108 |                                |          |              |
|                                                     |             |      |                                                  |                                                        |       |                                                                                                                            |                                                                                                                           | CDAI                                               | Change from BL until 12W               |                                      |                                     |  | -16.0 | -8.7        | -7.26 (-                                                                                                                                                                                                                                                                                                                                                                                                                                                                                                                                                                                                                                                     | pr=0.0979 |                                |          |              |
|                                                     |             |      |                                                  |                                                        |       |                                                                                                                            |                                                                                                                           |                                                    |                                        |                                      |                                     |  |       | 15.93-1.40) |                                                                                                                                                                                                                                                                                                                                                                                                                                                                                                                                                                                                                                                              |           |                                |          |              |
| <b>Secukinumab vs secukinumab (different doses)</b> |             |      |                                                  |                                                        |       |                                                                                                                            |                                                                                                                           |                                                    |                                        |                                      |                                     |  |       |             |                                                                                                                                                                                                                                                                                                                                                                                                                                                                                                                                                                                                                                                              |           |                                |          |              |
| Huang, 2019                                         | SLR (3 RCT) | 1292 | Failure of ≥1 TNFi                               | NR                                                     | NR    | Secukinumab 150mg (Subcutaneous at BL, W1, W2, W3, W4 and then q4W; or Intravenous 10mg/kg at BL, W2, W4 and then _mg q4W) | Secukinumab 75mg (Subcutaneous at BL, W1, W2, W3, W4 and then q4W; or Intravenous 10mg/kg at BL, W2, W4 and then _mg q4W) | ACR20                                              | 24W                                    | 1.03 (0.85-1.24)                     |                                     |  |       |             |                                                                                                                                                                                                                                                                                                                                                                                                                                                                                                                                                                                                                                                              |           | RR-1 favours secukinumab 150mg | Moderate | Low-moderate |
|                                                     |             |      |                                                  |                                                        |       |                                                                                                                            |                                                                                                                           | ACR50                                              | 24W                                    | 1.06 (0.78-1.44)                     |                                     |  |       |             |                                                                                                                                                                                                                                                                                                                                                                                                                                                                                                                                                                                                                                                              |           |                                |          |              |
|                                                     |             |      |                                                  |                                                        |       |                                                                                                                            |                                                                                                                           | ACR70                                              | 24W                                    | 1.32 (0.42-4.18)                     |                                     |  |       |             |                                                                                                                                                                                                                                                                                                                                                                                                                                                                                                                                                                                                                                                              |           |                                |          |              |
| <b>Other BDMARD vs BDMARD</b>                       |             |      |                                                  |                                                        |       |                                                                                                                            |                                                                                                                           |                                                    |                                        |                                      |                                     |  |       |             |                                                                                                                                                                                                                                                                                                                                                                                                                                                                                                                                                                                                                                                              |           |                                |          |              |
| Genovese, 2014c                                     | RCT         | 221  | Failure of TNFi                                  | DAS28-CRP 5.77, CDAI 38.80 (14.3-71.2), median (range) | 9.99Y | Olokizumab (all doses, subcutaneous)                                                                                       | Tocilizumab (8mg/kg q4w)                                                                                                  | ACR20 response<br>ACR50 response                   | 12W<br>12W                             |                                      |                                     |  | ns    |             |                                                                                                                                                                                                                                                                                                                                                                                                                                                                                                                                                                                                                                                              |           |                                |          | Low          |
|                                                     |             |      |                                                  |                                                        |       | Olokizumab (60mg q4w, subcutaneous)                                                                                        | Tocilizumab (8mg/kg q4w, subcutaneous)                                                                                    | ACR20 response<br>ACR50 response<br>DAS28-ESR      | 12W<br>12W<br>Change from BL until 12W | 12 (75.0%)<br>6 (37.5%)              | 27 (65.9%)<br>10 (24.4%)            |  |       |             |                                                                                                                                                                                                                                                                                                                                                                                                                                                                                                                                                                                                                                                              |           |                                |          |              |
|                                                     |             |      |                                                  |                                                        |       |                                                                                                                            |                                                                                                                           | CDAI                                               | Change from BL until 12W               |                                      |                                     |  |       |             |                                                                                                                                                                                                                                                                                                                                                                                                                                                                                                                                                                                                                                                              |           |                                |          |              |
|                                                     |             |      |                                                  |                                                        |       |                                                                                                                            |                                                                                                                           | HAQ-DI                                             | Change from BL until 12W               |                                      |                                     |  |       |             |                                                                                                                                                                                                                                                                                                                                                                                                                                                                                                                                                                                                                                                              |           |                                |          |              |
|                                                     |             |      |                                                  |                                                        |       | Olokizumab (60mg q2w, subcutaneous)                                                                                        |                                                                                                                           | ACR20 response<br>ACR50 response<br>DAS28-ESR      | 12W<br>12W<br>Change from BL until 12W | 6 (35.3%)<br>3 (17.6%)               |                                     |  |       |             |                                                                                                                                                                                                                                                                                                                                                                                                                                                                                                                                                                                                                                                              |           |                                |          |              |
|                                                     |             |      |                                                  |                                                        |       |                                                                                                                            |                                                                                                                           | CDAI                                               | Change from BL until 12W               |                                      |                                     |  |       |             |                                                                                                                                                                                                                                                                                                                                                                                                                                                                                                                                                                                                                                                              |           |                                |          |              |
|                                                     |             |      |                                                  |                                                        |       |                                                                                                                            |                                                                                                                           | HAQ-DI                                             | Change from BL until 12W               |                                      |                                     |  |       |             |                                                                                                                                                                                                                                                                                                                                                                                                                                                                                                                                                                                                                                                              |           |                                |          |              |
|                                                     |             |      |                                                  |                                                        |       | Olokizumab (120mg q4w, subcutaneous)                                                                                       |                                                                                                                           | ACR20 response<br>ACR50 response<br>DAS28-ESR      | 12W<br>12W<br>Change from BL until 12W | 11 (61.1%)<br>3 (16.7%)              |                                     |  |       |             |                                                                                                                                                                                                                                                                                                                                                                                                                                                                                                                                                                                                                                                              |           |                                |          |              |
|                                                     |             |      |                                                  |                                                        |       |                                                                                                                            |                                                                                                                           | CDAI                                               | Change from BL until 12W               |                                      |                                     |  |       |             |                                                                                                                                                                                                                                                                                                                                                                                                                                                                                                                                                                                                                                                              |           |                                |          |              |
|                                                     |             |      |                                                  |                                                        |       |                                                                                                                            |                                                                                                                           | HAQ-DI                                             | Change from BL until 12W               |                                      |                                     |  |       |             |                                                                                                                                                                                                                                                                                                                                                                                                                                                                                                                                                                                                                                                              |           |                                |          |              |
|                                                     |             |      |                                                  |                                                        |       | Olokizumab (120mg q2w, subcutaneous)                                                                                       |                                                                                                                           | ACR20 response<br>ACR50 response<br>DAS28-ESR      | 12W<br>12W<br>Change from BL until 12W | 10 (50.0%)<br>5 (25.0%)              |                                     |  |       |             |                                                                                                                                                                                                                                                                                                                                                                                                                                                                                                                                                                                                                                                              |           |                                |          |              |
|                                                     |             |      |                                                  |                                                        |       |                                                                                                                            |                                                                                                                           | CDAI                                               | Change from BL until 12W               |                                      |                                     |  |       |             |                                                                                                                                                                                                                                                                                                                                                                                                                                                                                                                                                                                                                                                              |           |                                |          |              |
|                                                     |             |      |                                                  |                                                        |       |                                                                                                                            |                                                                                                                           | HAQ-DI                                             | Change from BL until 12W               |                                      |                                     |  |       |             |                                                                                                                                                                                                                                                                                                                                                                                                                                                                                                                                                                                                                                                              |           |                                |          |              |
|                                                     |             |      |                                                  |                                                        |       | Olokizumab (240mg q4w, subcutaneous)                                                                                       |                                                                                                                           | ACR20 response                                     | 12W                                    | 7 (33.3%)                            |                                     |  |       |             |                                                                                                                                                                                                                                                                                                                                                                                                                                                                                                                                                                                                                                                              |           |                                |          |              |

| Study                             | Design      | N     | Intervention                                                             | Comparator    | Outcome           | Time                                   | Events  | OR (95% CI)           | OR (95% CI)              | OR (95% CI)                          | OR (95% CI)                                                                                               |                     |                                                                                                                                                                         |          |     |                  |                  |                |        |                   |
|-----------------------------------|-------------|-------|--------------------------------------------------------------------------|---------------|-------------------|----------------------------------------|---------|-----------------------|--------------------------|--------------------------------------|-----------------------------------------------------------------------------------------------------------|---------------------|-------------------------------------------------------------------------------------------------------------------------------------------------------------------------|----------|-----|------------------|------------------|----------------|--------|-------------------|
| Weinblatt, 2018                   | RCT         | 63    | Inadequate response to TNFi                                              | DAS28-CRP 6.1 | 7.2Y              | Mavrilimumab (100mg q2w, subcutaneous) | 22      | ACR50 response        | 12W                      | 3 (1.43%)                            | -1.59 (0.25)<br>(LS mean (SE))<br>-12.99 (-42.9-4.0) (median (range))<br>0.00 (-1.0-0.5) (median (range)) | High                |                                                                                                                                                                         |          |     |                  |                  |                |        |                   |
|                                   |             |       |                                                                          |               |                   |                                        |         | DAS28-ESR             | Change from BL until 12W |                                      |                                                                                                           |                     |                                                                                                                                                                         |          |     |                  |                  |                |        |                   |
|                                   |             |       |                                                                          |               |                   |                                        |         | CDAI                  | Change from BL until 12W |                                      |                                                                                                           |                     |                                                                                                                                                                         |          |     |                  |                  |                |        |                   |
|                                   |             |       |                                                                          |               |                   |                                        |         | HAQ-DI                | Change from BL until 12W |                                      |                                                                                                           |                     |                                                                                                                                                                         |          |     |                  |                  |                |        |                   |
|                                   |             |       |                                                                          |               |                   |                                        |         | ACR20 response        | 12W                      | 11 (52.4%)                           |                                                                                                           |                     |                                                                                                                                                                         |          |     |                  |                  |                |        |                   |
|                                   |             |       |                                                                          |               |                   |                                        |         | ACR50 response        | 12W                      | 5 (23.8%)                            |                                                                                                           |                     |                                                                                                                                                                         |          |     |                  |                  |                |        |                   |
|                                   |             |       |                                                                          |               |                   |                                        |         | DAS28-ESR             | Change from BL until 12W |                                      |                                                                                                           |                     |                                                                                                                                                                         |          |     |                  |                  |                |        |                   |
|                                   |             |       |                                                                          |               |                   |                                        |         | CDAI                  | Change from BL until 12W |                                      |                                                                                                           |                     |                                                                                                                                                                         |          |     |                  |                  |                |        |                   |
|                                   |             |       |                                                                          |               |                   |                                        |         | HAQ-DI                | Change from BL until 12W |                                      |                                                                                                           |                     |                                                                                                                                                                         |          |     |                  |                  |                |        |                   |
|                                   |             |       |                                                                          |               |                   |                                        |         | ACR20 response        | 24W                      | 22 (72.3%)                           |                                                                                                           |                     | 20 (61.2%)                                                                                                                                                              |          |     |                  |                  |                |        |                   |
|                                   |             |       |                                                                          |               |                   |                                        |         | ACR50 response        | 24W                      |                                      |                                                                                                           |                     |                                                                                                                                                                         |          |     |                  |                  |                |        |                   |
|                                   |             |       |                                                                          |               |                   |                                        |         | ACR70 response        | 24W                      |                                      |                                                                                                           |                     |                                                                                                                                                                         |          |     |                  |                  |                |        |                   |
| DAS28-CRP                         | 24W         |       |                                                                          |               |                   |                                        |         |                       |                          |                                      |                                                                                                           |                     |                                                                                                                                                                         |          |     |                  |                  |                |        |                   |
| CDAI s2.8                         | 24W         | 6.7%  | 9.0%                                                                     |               |                   |                                        |         |                       |                          |                                      |                                                                                                           |                     |                                                                                                                                                                         |          |     |                  |                  |                |        |                   |
| SDAI s3.3                         | 24W         | 10.1% | 12.1%                                                                    |               |                   |                                        |         |                       |                          |                                      |                                                                                                           |                     |                                                                                                                                                                         |          |     |                  |                  |                |        |                   |
| <b>JAKi vs bDMARD</b>             |             |       |                                                                          |               |                   |                                        |         |                       |                          |                                      |                                                                                                           |                     |                                                                                                                                                                         |          |     |                  |                  |                |        |                   |
| <b>JAKi vs (alternative) TNFi</b> |             |       |                                                                          |               |                   |                                        |         |                       |                          |                                      |                                                                                                           |                     |                                                                                                                                                                         |          |     |                  |                  |                |        |                   |
| Fleischmann, 2019                 | non-RCT     | 410   | Failure of adalimumab or upadacitinib (switch to other treatment option) | NR            | NR                | Adalimumab (40mg q2w)                  | 251     | Upadacitinib (15mg/D) | 159                      | Change in DAS28-CRP from BL until 6M | -2.40 (-2.58--2.22)                                                                                       | -2.88 (-3.11--2.65) | High                                                                                                                                                                    |          |     |                  |                  |                |        |                   |
| Vieira, 2016                      | SLR: RCTs 5 | 2136  | Inadequate response to TNFi                                              | NR            | 9.6-13.0Y (range) | Tofacitinib                            | Placebo | ACR70 response        | 12W                      | 3.80 (2.05-6.80)                     | -0.58 (-0.66--0.49)                                                                                       | -0.73 (-0.83--0.63) | OR-1 favours tofacitinib; Efficacy of tofacitinib comparable with bDMARDs<br>OR-1 favours tofacitinib; Network meta-analysis                                            | Moderate | Low |                  |                  |                |        |                   |
|                                   |             |       |                                                                          |               |                   |                                        |         | ACR70 response        | 24W                      | 5.77 (3.26-9.84)                     |                                                                                                           |                     |                                                                                                                                                                         |          |     |                  |                  |                |        |                   |
|                                   |             |       |                                                                          |               |                   |                                        |         | ACR70 response        | 12W                      | ns                                   |                                                                                                           |                     |                                                                                                                                                                         |          |     |                  |                  |                |        |                   |
|                                   |             |       |                                                                          |               |                   |                                        |         | ACR70 response        | 24W                      | ns                                   |                                                                                                           |                     |                                                                                                                                                                         |          |     |                  |                  |                |        |                   |
|                                   |             |       |                                                                          |               |                   |                                        |         | ACR70 response        | 14W                      | ns                                   |                                                                                                           |                     |                                                                                                                                                                         |          |     |                  |                  |                |        |                   |
|                                   |             |       |                                                                          |               |                   |                                        |         | ACR70 response        | 24W                      | 1.50 (0.70-3.25)                     |                                                                                                           |                     |                                                                                                                                                                         |          |     |                  |                  |                |        |                   |
|                                   |             |       |                                                                          |               |                   |                                        |         | ACR70 response        | 12W                      | ns                                   |                                                                                                           |                     |                                                                                                                                                                         |          |     |                  |                  |                |        |                   |
|                                   |             |       |                                                                          |               |                   |                                        |         | ACR70 response        | 24W                      | ns                                   |                                                                                                           |                     |                                                                                                                                                                         |          |     |                  |                  |                |        |                   |
|                                   |             |       |                                                                          |               |                   |                                        |         | ACR70 response        | 12W                      | ns                                   |                                                                                                           |                     |                                                                                                                                                                         |          |     |                  |                  |                |        |                   |
|                                   |             |       |                                                                          |               |                   |                                        |         | ACR70 response        | 24W                      | 0.53 (0.27-1.02)                     |                                                                                                           |                     |                                                                                                                                                                         |          |     |                  |                  |                |        |                   |
| <b>Tofacitinib vs abatacept</b>   |             |       |                                                                          |               |                   |                                        |         |                       |                          |                                      |                                                                                                           |                     |                                                                                                                                                                         |          |     |                  |                  |                |        |                   |
| Lee, 2016                         | SLR: RCTs 4 | 1796  | Inadequate response to TNFi                                              | NR            | NR                | Tocilizumab 4mg                        |         | Tofacitinib 10mg      |                          | ACR20 response                       | 24W-6M                                                                                                    | 1.05 (0.47-2.39)    | OR-1 favours tocilizumab 4mg; Tocilizumab highest performance regarding early good response based on ACR 20 response, followed by rituximab, abatacept and tofacitinib. | Moderate | Low |                  |                  |                |        |                   |
| Lee, 2016                         | SLR: RCTs 4 | 1796  | Inadequate response to TNFi                                              | NR            | NR                | Tocilizumab 4mg                        |         | Tofacitinib 10mg      |                          | ACR20 response                       | 24W-6M                                                                                                    | 1.05 (0.47-2.39)    | OR-1 favours tocilizumab 4mg; Tocilizumab highest performance regarding early good response based on ACR 20 response, followed by rituximab, abatacept and tofacitinib. | Moderate | Low |                  |                  |                |        |                   |
|                                   |             |       |                                                                          |               |                   |                                        |         |                       |                          |                                      |                                                                                                           |                     |                                                                                                                                                                         |          |     | Abatacept        | Tocilizumab 4mg  | ACR20 response | 24W-6M | 1.06 (0.46-2.28)  |
|                                   |             |       |                                                                          |               |                   |                                        |         |                       |                          |                                      |                                                                                                           |                     |                                                                                                                                                                         |          |     | Abatacept        | Tofacitinib 10mg | ACR20 response | 24W-6M | 1.10 (0.54-2.31)  |
|                                   |             |       |                                                                          |               |                   |                                        |         |                       |                          |                                      |                                                                                                           |                     |                                                                                                                                                                         |          |     | Rituximab        | Abatacept        | ACR20 response | 24W-6M | 1.14 (0.59-2.15)  |
|                                   |             |       |                                                                          |               |                   |                                        |         |                       |                          |                                      |                                                                                                           |                     |                                                                                                                                                                         |          |     | Tofacitinib 10mg | Tofacitinib 5mg  | ACR20 response | 24W-6M | 1.14 (0.71-1.86)  |
|                                   |             |       |                                                                          |               |                   |                                        |         |                       |                          |                                      |                                                                                                           |                     |                                                                                                                                                                         |          |     | Rituximab        | Tocilizumab 4mg  | ACR20 response | 24W-6M | 1.20 (0.56-2.50)  |
|                                   |             |       |                                                                          |               |                   |                                        |         |                       |                          |                                      |                                                                                                           |                     |                                                                                                                                                                         |          |     | Tocilizumab 4mg  | Tofacitinib 5mg  | ACR20 response | 24W-6M | 1.20 (0.54-2.75)  |
|                                   |             |       |                                                                          |               |                   |                                        |         |                       |                          |                                      |                                                                                                           |                     |                                                                                                                                                                         |          |     | Rituximab        | Tofacitinib 10mg | ACR20 response | 24W-6M | 1.26 (0.64-2.46)  |
|                                   |             |       |                                                                          |               |                   |                                        |         |                       |                          |                                      |                                                                                                           |                     |                                                                                                                                                                         |          |     | Abatacept        | Tofacitinib 5mg  | ACR20 response | 24W-6M | 1.26 (0.61-2.63)  |
|                                   |             |       |                                                                          |               |                   |                                        |         |                       |                          |                                      |                                                                                                           |                     |                                                                                                                                                                         |          |     | Rituximab        | Tofacitinib 5mg  | ACR20 response | 24W-6M | 1.44 (0.73-2.82)  |
|                                   |             |       |                                                                          |               |                   |                                        |         |                       |                          |                                      |                                                                                                           |                     |                                                                                                                                                                         |          |     | Tocilizumab 8mg  | Rituximab        | ACR20 response | 24W-6M | 1.92 (0.93-4.04)  |
|                                   |             |       |                                                                          |               |                   |                                        |         |                       |                          |                                      |                                                                                                           |                     |                                                                                                                                                                         |          |     | Tocilizumab 8mg  | Abatacept        | ACR20 response | 24W-6M | 2.17 (1.01-4.89)  |
|                                   |             |       |                                                                          |               |                   |                                        |         |                       |                          |                                      |                                                                                                           |                     |                                                                                                                                                                         |          |     | Tocilizumab 8mg  | Tocilizumab 4mg  | ACR20 response | 24W-6M | 2.29 (1.47-3.61)  |
|                                   |             |       |                                                                          |               |                   |                                        |         |                       |                          |                                      |                                                                                                           |                     |                                                                                                                                                                         |          |     | Tocilizumab 8mg  | Tofacitinib 10mg | ACR20 response | 24W-6M | 2.40 (1.09-5.41)  |
|                                   |             |       |                                                                          |               |                   |                                        |         |                       |                          |                                      |                                                                                                           |                     |                                                                                                                                                                         |          |     | Tocilizumab 8mg  | Tofacitinib 5mg  | ACR20 response | 24W-6M | 2.74 (1.26-6.27)  |
|                                   |             |       |                                                                          |               |                   |                                        |         |                       |                          |                                      |                                                                                                           |                     |                                                                                                                                                                         |          |     | Tofacitinib 5mg  | Placebo          | ACR20 response | 24W-6M | 3.30 (1.95-5.66)  |
|                                   |             |       |                                                                          |               |                   |                                        |         |                       |                          |                                      |                                                                                                           |                     |                                                                                                                                                                         |          |     | Tofacitinib 10mg | Placebo          | ACR20 response | 24W-6M | 3.76 (2.24-6.50)  |
|                                   |             |       |                                                                          |               |                   |                                        |         |                       |                          |                                      |                                                                                                           |                     |                                                                                                                                                                         |          |     | Tocilizumab 4mg  | Placebo          | ACR20 response | 24W-6M | 3.94 (2.19-7.48)  |
|                                   |             |       |                                                                          |               |                   |                                        |         |                       |                          |                                      |                                                                                                           |                     |                                                                                                                                                                         |          |     | Abatacept        | Placebo          | ACR20 response | 24W-6M | 4.15 (2.58-7.00)  |
|                                   |             |       |                                                                          |               |                   |                                        |         |                       |                          |                                      |                                                                                                           |                     |                                                                                                                                                                         |          |     | Rituximab        | Placebo          | ACR20 response | 24W-6M | 4.73 (3.14-7.27)  |
|                                   |             |       |                                                                          |               |                   |                                        |         |                       |                          |                                      |                                                                                                           |                     |                                                                                                                                                                         |          |     | Tocilizumab 8mg  | Placebo          | ACR20 response | 24W-6M | 9.04 (5.15-17.08) |

|                                      |                             |                       |                         |                         |                                      |                             |                       |                         |                                                                                                                                                                                                                                                                                                                                                                                                                                                                                                                                                                                                                                                                                                                                                                                                                                                                                                                                                                                                                                                                                                                                |          |     |                         |                                   |                             |     |                  |                                                                                                                                                                                                                                                                                                                                                              |          |     |                 |                  |                |        |                  |                                                                                                                                                                                                                                                                                                                                                                                                                                                                                                                                                                                                                                                                                                                                                                                                                                                                                                                                                                                                                                                                                                                                                                |          |
|--------------------------------------|-----------------------------|-----------------------|-------------------------|-------------------------|--------------------------------------|-----------------------------|-----------------------|-------------------------|--------------------------------------------------------------------------------------------------------------------------------------------------------------------------------------------------------------------------------------------------------------------------------------------------------------------------------------------------------------------------------------------------------------------------------------------------------------------------------------------------------------------------------------------------------------------------------------------------------------------------------------------------------------------------------------------------------------------------------------------------------------------------------------------------------------------------------------------------------------------------------------------------------------------------------------------------------------------------------------------------------------------------------------------------------------------------------------------------------------------------------|----------|-----|-------------------------|-----------------------------------|-----------------------------|-----|------------------|--------------------------------------------------------------------------------------------------------------------------------------------------------------------------------------------------------------------------------------------------------------------------------------------------------------------------------------------------------------|----------|-----|-----------------|------------------|----------------|--------|------------------|----------------------------------------------------------------------------------------------------------------------------------------------------------------------------------------------------------------------------------------------------------------------------------------------------------------------------------------------------------------------------------------------------------------------------------------------------------------------------------------------------------------------------------------------------------------------------------------------------------------------------------------------------------------------------------------------------------------------------------------------------------------------------------------------------------------------------------------------------------------------------------------------------------------------------------------------------------------------------------------------------------------------------------------------------------------------------------------------------------------------------------------------------------------|----------|
| <b>Vieira, 2016</b> SLR: RCTs 5 2136 | Inadequate response to TNFI | NR                    | 9.6-13.0Y (range)       | Tofactinib              | Placebo                              | ACR70 response              | 12W                   | 3.80 (2.05-6.80)        | OR-1 favours tofacitinib; Efficacy of tofacitinib comparable with bDMARDs<br>OR-1 favours tofacitinib; Network meta-analysis<br>OR-1 favours tofacitinib<br>OR-1 favours tofacitinib<br>OR-1 favours tofacitinib<br>OR-1 favours tofacitinib<br>OR-1 favours tofacitinib<br>OR-1 favours tofacitinib<br>OR-1 favours tofacitinib                                                                                                                                                                                                                                                                                                                                                                                                                                                                                                                                                                                                                                                                                                                                                                                               | Moderate | Low |                         |                                   |                             |     |                  |                                                                                                                                                                                                                                                                                                                                                              |          |     |                 |                  |                |        |                  |                                                                                                                                                                                                                                                                                                                                                                                                                                                                                                                                                                                                                                                                                                                                                                                                                                                                                                                                                                                                                                                                                                                                                                |          |
|                                      |                             |                       |                         |                         | Abatacept                            | ACR70 response              | 24W                   | 5.77 (3.26-9.84)        |                                                                                                                                                                                                                                                                                                                                                                                                                                                                                                                                                                                                                                                                                                                                                                                                                                                                                                                                                                                                                                                                                                                                |          |     |                         |                                   |                             |     |                  |                                                                                                                                                                                                                                                                                                                                                              |          |     |                 |                  |                |        |                  |                                                                                                                                                                                                                                                                                                                                                                                                                                                                                                                                                                                                                                                                                                                                                                                                                                                                                                                                                                                                                                                                                                                                                                |          |
|                                      |                             |                       |                         |                         | Golimumab                            | ACR70 response              | 14W                   | ns                      |                                                                                                                                                                                                                                                                                                                                                                                                                                                                                                                                                                                                                                                                                                                                                                                                                                                                                                                                                                                                                                                                                                                                |          |     |                         |                                   |                             |     |                  |                                                                                                                                                                                                                                                                                                                                                              |          |     |                 |                  |                |        |                  |                                                                                                                                                                                                                                                                                                                                                                                                                                                                                                                                                                                                                                                                                                                                                                                                                                                                                                                                                                                                                                                                                                                                                                |          |
|                                      |                             |                       |                         |                         | Tocilizumab                          | ACR70 response              | 24W                   | 1.50 (0.70-3.25)        |                                                                                                                                                                                                                                                                                                                                                                                                                                                                                                                                                                                                                                                                                                                                                                                                                                                                                                                                                                                                                                                                                                                                |          |     |                         |                                   |                             |     |                  |                                                                                                                                                                                                                                                                                                                                                              |          |     |                 |                  |                |        |                  |                                                                                                                                                                                                                                                                                                                                                                                                                                                                                                                                                                                                                                                                                                                                                                                                                                                                                                                                                                                                                                                                                                                                                                |          |
|                                      |                             |                       |                         |                         | Rituximab                            | ACR70 response              | 12W                   | ns                      |                                                                                                                                                                                                                                                                                                                                                                                                                                                                                                                                                                                                                                                                                                                                                                                                                                                                                                                                                                                                                                                                                                                                |          |     |                         |                                   |                             |     |                  |                                                                                                                                                                                                                                                                                                                                                              |          |     |                 |                  |                |        |                  |                                                                                                                                                                                                                                                                                                                                                                                                                                                                                                                                                                                                                                                                                                                                                                                                                                                                                                                                                                                                                                                                                                                                                                |          |
|                                      |                             |                       |                         |                         | Rituximab                            | ACR70 response              | 24W                   | 0.53 (0.27-1.02)        |                                                                                                                                                                                                                                                                                                                                                                                                                                                                                                                                                                                                                                                                                                                                                                                                                                                                                                                                                                                                                                                                                                                                |          |     |                         |                                   |                             |     |                  |                                                                                                                                                                                                                                                                                                                                                              |          |     |                 |                  |                |        |                  |                                                                                                                                                                                                                                                                                                                                                                                                                                                                                                                                                                                                                                                                                                                                                                                                                                                                                                                                                                                                                                                                                                                                                                |          |
| <b>Tofacitinib vs rituximab</b>      |                             |                       |                         |                         |                                      |                             |                       |                         |                                                                                                                                                                                                                                                                                                                                                                                                                                                                                                                                                                                                                                                                                                                                                                                                                                                                                                                                                                                                                                                                                                                                |          |     |                         |                                   |                             |     |                  |                                                                                                                                                                                                                                                                                                                                                              |          |     |                 |                  |                |        |                  |                                                                                                                                                                                                                                                                                                                                                                                                                                                                                                                                                                                                                                                                                                                                                                                                                                                                                                                                                                                                                                                                                                                                                                |          |
| <b>Lee, 2016</b> SLR: RCTs 4 1796    | Inadequate response to TNFI | NR                    | NR                      | Tocilizumab 4mg         | Tofacitinib 10mg                     | ACR20 response              | 24W-6M                | 1.05 (0.47-2.39)        | OR-1 favours tocilizumab 4mg; Tocilizumab highest performance regarding early good response based on ACR 20 response, followed by rituximab, abatacept and tofacitinib.<br>OR-1 favours abatacept<br>OR-1 favours abatacept<br>OR-1 favours rituximab<br>OR-1 favours tofacitinib 10mg<br>OR-1 favours rituximab<br>OR-1 favours tocilizumab 4mg<br>OR-1 favours rituximab<br>OR-1 favours abatacept<br>OR-1 favours rituximab<br>OR-1 favours tocilizumab 8mg<br>OR-1 favours tocilizumab 8mg | Moderate | Low |                         |                                   |                             |     |                  |                                                                                                                                                                                                                                                                                                                                                              |          |     |                 |                  |                |        |                  |                                                                                                                                                                                                                                                                                                                                                                                                                                                                                                                                                                                                                                                                                                                                                                                                                                                                                                                                                                                                                                                                                                                                                                |          |
|                                      |                             |                       |                         |                         | Abatacept                            | ACR20 response              | 24W-6M                | 1.06 (0.46-2.28)        |                                                                                                                                                                                                                                                                                                                                                                                                                                                                                                                                                                                                                                                                                                                                                                                                                                                                                                                                                                                                                                                                                                                                |          |     |                         |                                   |                             |     |                  |                                                                                                                                                                                                                                                                                                                                                              |          |     |                 |                  |                |        |                  |                                                                                                                                                                                                                                                                                                                                                                                                                                                                                                                                                                                                                                                                                                                                                                                                                                                                                                                                                                                                                                                                                                                                                                |          |
|                                      |                             |                       |                         |                         | Abatacept                            | ACR20 response              | 24W-6M                | 1.10 (0.54-2.31)        |                                                                                                                                                                                                                                                                                                                                                                                                                                                                                                                                                                                                                                                                                                                                                                                                                                                                                                                                                                                                                                                                                                                                |          |     |                         |                                   |                             |     |                  |                                                                                                                                                                                                                                                                                                                                                              |          |     |                 |                  |                |        |                  |                                                                                                                                                                                                                                                                                                                                                                                                                                                                                                                                                                                                                                                                                                                                                                                                                                                                                                                                                                                                                                                                                                                                                                |          |
|                                      |                             |                       |                         |                         | Rituximab                            | ACR20 response              | 24W-6M                | 1.14 (0.59-2.15)        |                                                                                                                                                                                                                                                                                                                                                                                                                                                                                                                                                                                                                                                                                                                                                                                                                                                                                                                                                                                                                                                                                                                                |          |     |                         |                                   |                             |     |                  |                                                                                                                                                                                                                                                                                                                                                              |          |     |                 |                  |                |        |                  |                                                                                                                                                                                                                                                                                                                                                                                                                                                                                                                                                                                                                                                                                                                                                                                                                                                                                                                                                                                                                                                                                                                                                                |          |
|                                      |                             |                       |                         |                         | Tofacitinib 10mg                     | ACR20 response              | 24W-6M                | 1.14 (0.71-1.86)        |                                                                                                                                                                                                                                                                                                                                                                                                                                                                                                                                                                                                                                                                                                                                                                                                                                                                                                                                                                                                                                                                                                                                |          |     |                         |                                   |                             |     |                  |                                                                                                                                                                                                                                                                                                                                                              |          |     |                 |                  |                |        |                  |                                                                                                                                                                                                                                                                                                                                                                                                                                                                                                                                                                                                                                                                                                                                                                                                                                                                                                                                                                                                                                                                                                                                                                |          |
|                                      |                             |                       |                         |                         | Rituximab                            | ACR20 response              | 24W-6M                | 1.20 (0.56-2.50)        |                                                                                                                                                                                                                                                                                                                                                                                                                                                                                                                                                                                                                                                                                                                                                                                                                                                                                                                                                                                                                                                                                                                                |          |     |                         |                                   |                             |     |                  |                                                                                                                                                                                                                                                                                                                                                              |          |     |                 |                  |                |        |                  |                                                                                                                                                                                                                                                                                                                                                                                                                                                                                                                                                                                                                                                                                                                                                                                                                                                                                                                                                                                                                                                                                                                                                                |          |
|                                      |                             |                       |                         |                         | Tocilizumab 4mg                      | ACR20 response              | 24W-6M                | 1.20 (0.54-2.75)        |                                                                                                                                                                                                                                                                                                                                                                                                                                                                                                                                                                                                                                                                                                                                                                                                                                                                                                                                                                                                                                                                                                                                |          |     |                         |                                   |                             |     |                  |                                                                                                                                                                                                                                                                                                                                                              |          |     |                 |                  |                |        |                  |                                                                                                                                                                                                                                                                                                                                                                                                                                                                                                                                                                                                                                                                                                                                                                                                                                                                                                                                                                                                                                                                                                                                                                |          |
|                                      |                             |                       |                         |                         | <b>Rituximab</b>                     | <b>ACR20 response</b>       | <b>24W-6M</b>         | <b>1.26 (0.54-2.46)</b> |                                                                                                                                                                                                                                                                                                                                                                                                                                                                                                                                                                                                                                                                                                                                                                                                                                                                                                                                                                                                                                                                                                                                |          |     |                         |                                   |                             |     |                  |                                                                                                                                                                                                                                                                                                                                                              |          |     |                 |                  |                |        |                  |                                                                                                                                                                                                                                                                                                                                                                                                                                                                                                                                                                                                                                                                                                                                                                                                                                                                                                                                                                                                                                                                                                                                                                |          |
|                                      |                             |                       |                         |                         | Abatacept                            | ACR20 response              | 24W-6M                | 1.26 (0.61-2.63)        |                                                                                                                                                                                                                                                                                                                                                                                                                                                                                                                                                                                                                                                                                                                                                                                                                                                                                                                                                                                                                                                                                                                                |          |     |                         |                                   |                             |     |                  |                                                                                                                                                                                                                                                                                                                                                              |          |     |                 |                  |                |        |                  |                                                                                                                                                                                                                                                                                                                                                                                                                                                                                                                                                                                                                                                                                                                                                                                                                                                                                                                                                                                                                                                                                                                                                                |          |
|                                      |                             |                       |                         |                         | <b>Rituximab</b>                     | <b>ACR20 response</b>       | <b>24W-6M</b>         | <b>1.44 (0.73-2.82)</b> |                                                                                                                                                                                                                                                                                                                                                                                                                                                                                                                                                                                                                                                                                                                                                                                                                                                                                                                                                                                                                                                                                                                                |          |     |                         |                                   |                             |     |                  |                                                                                                                                                                                                                                                                                                                                                              |          |     |                 |                  |                |        |                  |                                                                                                                                                                                                                                                                                                                                                                                                                                                                                                                                                                                                                                                                                                                                                                                                                                                                                                                                                                                                                                                                                                                                                                |          |
|                                      |                             |                       |                         |                         | Rituximab                            | ACR20 response              | 24W-6M                | 1.92 (0.93-4.04)        |                                                                                                                                                                                                                                                                                                                                                                                                                                                                                                                                                                                                                                                                                                                                                                                                                                                                                                                                                                                                                                                                                                                                |          |     |                         |                                   |                             |     |                  |                                                                                                                                                                                                                                                                                                                                                              |          |     |                 |                  |                |        |                  |                                                                                                                                                                                                                                                                                                                                                                                                                                                                                                                                                                                                                                                                                                                                                                                                                                                                                                                                                                                                                                                                                                                                                                |          |
|                                      |                             |                       |                         |                         | Tocilizumab 8mg                      | Abatacept                   | ACR20 response        | 24W-6M                  |                                                                                                                                                                                                                                                                                                                                                                                                                                                                                                                                                                                                                                                                                                                                                                                                                                                                                                                                                                                                                                                                                                                                |          |     | 2.17 (1.01-4.89)        |                                   |                             |     |                  |                                                                                                                                                                                                                                                                                                                                                              |          |     |                 |                  |                |        |                  |                                                                                                                                                                                                                                                                                                                                                                                                                                                                                                                                                                                                                                                                                                                                                                                                                                                                                                                                                                                                                                                                                                                                                                |          |
|                                      |                             |                       |                         |                         | Tocilizumab 8mg                      | Tocilizumab 4mg             | ACR20 response        | 24W-6M                  |                                                                                                                                                                                                                                                                                                                                                                                                                                                                                                                                                                                                                                                                                                                                                                                                                                                                                                                                                                                                                                                                                                                                |          |     | 2.29 (1.47-3.61)        |                                   |                             |     |                  |                                                                                                                                                                                                                                                                                                                                                              |          |     |                 |                  |                |        |                  |                                                                                                                                                                                                                                                                                                                                                                                                                                                                                                                                                                                                                                                                                                                                                                                                                                                                                                                                                                                                                                                                                                                                                                |          |
|                                      |                             |                       |                         |                         | Tocilizumab 8mg                      | Tocilizumab 8mg             | ACR20 response        | 24W-6M                  |                                                                                                                                                                                                                                                                                                                                                                                                                                                                                                                                                                                                                                                                                                                                                                                                                                                                                                                                                                                                                                                                                                                                |          |     | 2.40 (1.09-5.41)        |                                   |                             |     |                  |                                                                                                                                                                                                                                                                                                                                                              |          |     |                 |                  |                |        |                  |                                                                                                                                                                                                                                                                                                                                                                                                                                                                                                                                                                                                                                                                                                                                                                                                                                                                                                                                                                                                                                                                                                                                                                |          |
|                                      |                             |                       |                         |                         | Tocilizumab 8mg                      | Tocilizumab 8mg             | ACR20 response        | 24W-6M                  |                                                                                                                                                                                                                                                                                                                                                                                                                                                                                                                                                                                                                                                                                                                                                                                                                                                                                                                                                                                                                                                                                                                                |          |     | 2.74 (1.26-6.27)        |                                   |                             |     |                  |                                                                                                                                                                                                                                                                                                                                                              |          |     |                 |                  |                |        |                  |                                                                                                                                                                                                                                                                                                                                                                                                                                                                                                                                                                                                                                                                                                                                                                                                                                                                                                                                                                                                                                                                                                                                                                |          |
|                                      |                             |                       |                         |                         | Tofacitinib 5mg                      | Placebo                     | ACR20 response        | 24W-6M                  |                                                                                                                                                                                                                                                                                                                                                                                                                                                                                                                                                                                                                                                                                                                                                                                                                                                                                                                                                                                                                                                                                                                                |          |     | 3.30 (1.95-5.66)        |                                   |                             |     |                  |                                                                                                                                                                                                                                                                                                                                                              |          |     |                 |                  |                |        |                  |                                                                                                                                                                                                                                                                                                                                                                                                                                                                                                                                                                                                                                                                                                                                                                                                                                                                                                                                                                                                                                                                                                                                                                |          |
|                                      |                             |                       |                         |                         | Tofacitinib 10mg                     | Placebo                     | ACR20 response        | 24W-6M                  |                                                                                                                                                                                                                                                                                                                                                                                                                                                                                                                                                                                                                                                                                                                                                                                                                                                                                                                                                                                                                                                                                                                                |          |     | 3.76 (2.24-6.50)        |                                   |                             |     |                  |                                                                                                                                                                                                                                                                                                                                                              |          |     |                 |                  |                |        |                  |                                                                                                                                                                                                                                                                                                                                                                                                                                                                                                                                                                                                                                                                                                                                                                                                                                                                                                                                                                                                                                                                                                                                                                |          |
|                                      |                             |                       |                         |                         | Tocilizumab 4mg                      | Placebo                     | ACR20 response        | 24W-6M                  |                                                                                                                                                                                                                                                                                                                                                                                                                                                                                                                                                                                                                                                                                                                                                                                                                                                                                                                                                                                                                                                                                                                                |          |     | 3.94 (2.19-7.48)        |                                   |                             |     |                  |                                                                                                                                                                                                                                                                                                                                                              |          |     |                 |                  |                |        |                  |                                                                                                                                                                                                                                                                                                                                                                                                                                                                                                                                                                                                                                                                                                                                                                                                                                                                                                                                                                                                                                                                                                                                                                |          |
|                                      |                             |                       |                         |                         | Abatacept                            | Placebo                     | ACR20 response        | 24W-6M                  |                                                                                                                                                                                                                                                                                                                                                                                                                                                                                                                                                                                                                                                                                                                                                                                                                                                                                                                                                                                                                                                                                                                                |          |     | 4.15 (2.58-7.00)        |                                   |                             |     |                  |                                                                                                                                                                                                                                                                                                                                                              |          |     |                 |                  |                |        |                  |                                                                                                                                                                                                                                                                                                                                                                                                                                                                                                                                                                                                                                                                                                                                                                                                                                                                                                                                                                                                                                                                                                                                                                |          |
|                                      |                             |                       |                         |                         | Rituximab                            | Placebo                     | ACR20 response        | 24W-6M                  |                                                                                                                                                                                                                                                                                                                                                                                                                                                                                                                                                                                                                                                                                                                                                                                                                                                                                                                                                                                                                                                                                                                                |          |     | 4.73 (3.14-7.27)        |                                   |                             |     |                  |                                                                                                                                                                                                                                                                                                                                                              |          |     |                 |                  |                |        |                  |                                                                                                                                                                                                                                                                                                                                                                                                                                                                                                                                                                                                                                                                                                                                                                                                                                                                                                                                                                                                                                                                                                                                                                |          |
|                                      |                             |                       |                         |                         | Tocilizumab 8mg                      | Placebo                     | ACR20 response        | 24W-6M                  |                                                                                                                                                                                                                                                                                                                                                                                                                                                                                                                                                                                                                                                                                                                                                                                                                                                                                                                                                                                                                                                                                                                                |          |     | 9.04 (5.15-17.08)       |                                   |                             |     |                  |                                                                                                                                                                                                                                                                                                                                                              |          |     |                 |                  |                |        |                  |                                                                                                                                                                                                                                                                                                                                                                                                                                                                                                                                                                                                                                                                                                                                                                                                                                                                                                                                                                                                                                                                                                                                                                |          |
|                                      |                             |                       |                         |                         | <b>Tofacitinib</b>                   | <b>Placebo</b>              | <b>ACR70 response</b> | <b>12W</b>              |                                                                                                                                                                                                                                                                                                                                                                                                                                                                                                                                                                                                                                                                                                                                                                                                                                                                                                                                                                                                                                                                                                                                |          |     | <b>3.80 (2.05-6.80)</b> |                                   |                             |     |                  |                                                                                                                                                                                                                                                                                                                                                              |          |     |                 |                  |                |        |                  |                                                                                                                                                                                                                                                                                                                                                                                                                                                                                                                                                                                                                                                                                                                                                                                                                                                                                                                                                                                                                                                                                                                                                                |          |
|                                      |                             |                       |                         |                         | <b>Vieira, 2016</b> SLR: RCTs 5 2136 | Inadequate response to TNFI | NR                    | 9.6-13.0Y (range)       |                                                                                                                                                                                                                                                                                                                                                                                                                                                                                                                                                                                                                                                                                                                                                                                                                                                                                                                                                                                                                                                                                                                                |          |     | Tofactinib              | Placebo                           | ACR70 response              | 24W | 5.77 (3.26-9.84) | OR-1 favours tofacitinib; Efficacy of tofacitinib comparable with bDMARDs<br>OR-1 favours tofacitinib; Network meta-analysis<br>OR-1 favours tofacitinib<br>OR-1 favours tofacitinib | Moderate | Low |                 |                  |                |        |                  |                                                                                                                                                                                                                                                                                                                                                                                                                                                                                                                                                                                                                                                                                                                                                                                                                                                                                                                                                                                                                                                                                                                                                                |          |
|                                      |                             |                       |                         |                         |                                      |                             |                       |                         |                                                                                                                                                                                                                                                                                                                                                                                                                                                                                                                                                                                                                                                                                                                                                                                                                                                                                                                                                                                                                                                                                                                                |          |     |                         | Abatacept                         | ACR70 response              | 12W | ns               |                                                                                                                                                                                                                                                                                                                                                              |          |     |                 |                  |                |        |                  |                                                                                                                                                                                                                                                                                                                                                                                                                                                                                                                                                                                                                                                                                                                                                                                                                                                                                                                                                                                                                                                                                                                                                                |          |
|                                      |                             |                       |                         |                         |                                      |                             |                       |                         |                                                                                                                                                                                                                                                                                                                                                                                                                                                                                                                                                                                                                                                                                                                                                                                                                                                                                                                                                                                                                                                                                                                                |          |     |                         | Golimumab                         | ACR70 response              | 14W | ns               |                                                                                                                                                                                                                                                                                                                                                              |          |     |                 |                  |                |        |                  |                                                                                                                                                                                                                                                                                                                                                                                                                                                                                                                                                                                                                                                                                                                                                                                                                                                                                                                                                                                                                                                                                                                                                                |          |
|                                      |                             |                       |                         |                         |                                      |                             |                       |                         |                                                                                                                                                                                                                                                                                                                                                                                                                                                                                                                                                                                                                                                                                                                                                                                                                                                                                                                                                                                                                                                                                                                                |          |     |                         | Tocilizumab                       | ACR70 response              | 24W | 1.50 (0.70-3.25) |                                                                                                                                                                                                                                                                                                                                                              |          |     |                 |                  |                |        |                  |                                                                                                                                                                                                                                                                                                                                                                                                                                                                                                                                                                                                                                                                                                                                                                                                                                                                                                                                                                                                                                                                                                                                                                |          |
|                                      |                             |                       |                         |                         |                                      |                             |                       |                         |                                                                                                                                                                                                                                                                                                                                                                                                                                                                                                                                                                                                                                                                                                                                                                                                                                                                                                                                                                                                                                                                                                                                |          |     |                         | Rituximab                         | ACR70 response              | 12W | ns               |                                                                                                                                                                                                                                                                                                                                                              |          |     |                 |                  |                |        |                  |                                                                                                                                                                                                                                                                                                                                                                                                                                                                                                                                                                                                                                                                                                                                                                                                                                                                                                                                                                                                                                                                                                                                                                |          |
|                                      |                             |                       |                         |                         |                                      |                             |                       |                         |                                                                                                                                                                                                                                                                                                                                                                                                                                                                                                                                                                                                                                                                                                                                                                                                                                                                                                                                                                                                                                                                                                                                |          |     |                         | Rituximab                         | ACR70 response              | 24W | 0.53 (0.27-1.02) |                                                                                                                                                                                                                                                                                                                                                              |          |     |                 |                  |                |        |                  |                                                                                                                                                                                                                                                                                                                                                                                                                                                                                                                                                                                                                                                                                                                                                                                                                                                                                                                                                                                                                                                                                                                                                                |          |
|                                      |                             |                       |                         |                         |                                      |                             |                       |                         |                                                                                                                                                                                                                                                                                                                                                                                                                                                                                                                                                                                                                                                                                                                                                                                                                                                                                                                                                                                                                                                                                                                                |          |     |                         | <b>Tofacitinib vs tocilizumab</b> |                             |     |                  |                                                                                                                                                                                                                                                                                                                                                              |          |     |                 |                  |                |        |                  |                                                                                                                                                                                                                                                                                                                                                                                                                                                                                                                                                                                                                                                                                                                                                                                                                                                                                                                                                                                                                                                                                                                                                                |          |
|                                      |                             |                       |                         |                         |                                      |                             |                       |                         |                                                                                                                                                                                                                                                                                                                                                                                                                                                                                                                                                                                                                                                                                                                                                                                                                                                                                                                                                                                                                                                                                                                                |          |     |                         | <b>Lee, 2016</b> SLR: RCTs 4 1796 | Inadequate response to TNFI | NR  | NR               |                                                                                                                                                                                                                                                                                                                                                              |          |     | Tocilizumab 4mg | Tofacitinib 10mg | ACR20 response | 24W-6M | 1.05 (0.47-2.39) | OR-1 favours tocilizumab 4mg; Tocilizumab highest performance regarding early good response based on ACR 20 response, followed by rituximab, abatacept and tofacitinib.<br>OR-1 favours abatacept<br>OR-1 favours abatacept<br>OR-1 favours rituximab<br>OR-1 favours tofacitinib 10mg<br>OR-1 favours rituximab<br>OR-1 favours tocilizumab 4mg<br>OR-1 favours rituximab<br>OR-1 favours abatacept<br>OR-1 favours rituximab<br>OR-1 favours tocilizumab 8mg<br>OR-1 favours tocilizumab 8mg | Moderate |
| Abatacept                            | ACR20 response              | 24W-6M                | 1.06 (0.46-2.28)        |                         |                                      |                             |                       |                         |                                                                                                                                                                                                                                                                                                                                                                                                                                                                                                                                                                                                                                                                                                                                                                                                                                                                                                                                                                                                                                                                                                                                |          |     |                         |                                   |                             |     |                  |                                                                                                                                                                                                                                                                                                                                                              |          |     |                 |                  |                |        |                  |                                                                                                                                                                                                                                                                                                                                                                                                                                                                                                                                                                                                                                                                                                                                                                                                                                                                                                                                                                                                                                                                                                                                                                |          |
| Abatacept                            | ACR20 response              | 24W-6M                | 1.10 (0.54-2.31)        |                         |                                      |                             |                       |                         |                                                                                                                                                                                                                                                                                                                                                                                                                                                                                                                                                                                                                                                                                                                                                                                                                                                                                                                                                                                                                                                                                                                                |          |     |                         |                                   |                             |     |                  |                                                                                                                                                                                                                                                                                                                                                              |          |     |                 |                  |                |        |                  |                                                                                                                                                                                                                                                                                                                                                                                                                                                                                                                                                                                                                                                                                                                                                                                                                                                                                                                                                                                                                                                                                                                                                                |          |
| Rituximab                            | ACR20 response              | 24W-6M                | 1.14 (0.59-2.15)        |                         |                                      |                             |                       |                         |                                                                                                                                                                                                                                                                                                                                                                                                                                                                                                                                                                                                                                                                                                                                                                                                                                                                                                                                                                                                                                                                                                                                |          |     |                         |                                   |                             |     |                  |                                                                                                                                                                                                                                                                                                                                                              |          |     |                 |                  |                |        |                  |                                                                                                                                                                                                                                                                                                                                                                                                                                                                                                                                                                                                                                                                                                                                                                                                                                                                                                                                                                                                                                                                                                                                                                |          |
| Tofacitinib 10mg                     | ACR20 response              | 24W-6M                | 1.14 (0.71-1.86)        |                         |                                      |                             |                       |                         |                                                                                                                                                                                                                                                                                                                                                                                                                                                                                                                                                                                                                                                                                                                                                                                                                                                                                                                                                                                                                                                                                                                                |          |     |                         |                                   |                             |     |                  |                                                                                                                                                                                                                                                                                                                                                              |          |     |                 |                  |                |        |                  |                                                                                                                                                                                                                                                                                                                                                                                                                                                                                                                                                                                                                                                                                                                                                                                                                                                                                                                                                                                                                                                                                                                                                                |          |
| Rituximab                            | ACR20 response              | 24W-6M                | 1.20 (0.56-2.50)        |                         |                                      |                             |                       |                         |                                                                                                                                                                                                                                                                                                                                                                                                                                                                                                                                                                                                                                                                                                                                                                                                                                                                                                                                                                                                                                                                                                                                |          |     |                         |                                   |                             |     |                  |                                                                                                                                                                                                                                                                                                                                                              |          |     |                 |                  |                |        |                  |                                                                                                                                                                                                                                                                                                                                                                                                                                                                                                                                                                                                                                                                                                                                                                                                                                                                                                                                                                                                                                                                                                                                                                |          |
| Tocilizumab 4mg                      | ACR20 response              | 24W-6M                | 1.20 (0.54-2.75)        |                         |                                      |                             |                       |                         |                                                                                                                                                                                                                                                                                                                                                                                                                                                                                                                                                                                                                                                                                                                                                                                                                                                                                                                                                                                                                                                                                                                                |          |     |                         |                                   |                             |     |                  |                                                                                                                                                                                                                                                                                                                                                              |          |     |                 |                  |                |        |                  |                                                                                                                                                                                                                                                                                                                                                                                                                                                                                                                                                                                                                                                                                                                                                                                                                                                                                                                                                                                                                                                                                                                                                                |          |
| <b>Rituximab</b>                     | <b>ACR20 response</b>       | <b>24W-6M</b>         | <b>1.26 (0.54-2.46)</b> |                         |                                      |                             |                       |                         |                                                                                                                                                                                                                                                                                                                                                                                                                                                                                                                                                                                                                                                                                                                                                                                                                                                                                                                                                                                                                                                                                                                                |          |     |                         |                                   |                             |     |                  |                                                                                                                                                                                                                                                                                                                                                              |          |     |                 |                  |                |        |                  |                                                                                                                                                                                                                                                                                                                                                                                                                                                                                                                                                                                                                                                                                                                                                                                                                                                                                                                                                                                                                                                                                                                                                                |          |
| Abatacept                            | ACR20 response              | 24W-6M                | 1.26 (0.61-2.63)        |                         |                                      |                             |                       |                         |                                                                                                                                                                                                                                                                                                                                                                                                                                                                                                                                                                                                                                                                                                                                                                                                                                                                                                                                                                                                                                                                                                                                |          |     |                         |                                   |                             |     |                  |                                                                                                                                                                                                                                                                                                                                                              |          |     |                 |                  |                |        |                  |                                                                                                                                                                                                                                                                                                                                                                                                                                                                                                                                                                                                                                                                                                                                                                                                                                                                                                                                                                                                                                                                                                                                                                |          |
| <b>Rituximab</b>                     | <b>ACR20 response</b>       | <b>24W-6M</b>         | <b>1.44 (0.73-2.82)</b> |                         |                                      |                             |                       |                         |                                                                                                                                                                                                                                                                                                                                                                                                                                                                                                                                                                                                                                                                                                                                                                                                                                                                                                                                                                                                                                                                                                                                |          |     |                         |                                   |                             |     |                  |                                                                                                                                                                                                                                                                                                                                                              |          |     |                 |                  |                |        |                  |                                                                                                                                                                                                                                                                                                                                                                                                                                                                                                                                                                                                                                                                                                                                                                                                                                                                                                                                                                                                                                                                                                                                                                |          |
| Rituximab                            | ACR20 response              | 24W-6M                | 1.92 (0.93-4.04)        |                         |                                      |                             |                       |                         |                                                                                                                                                                                                                                                                                                                                                                                                                                                                                                                                                                                                                                                                                                                                                                                                                                                                                                                                                                                                                                                                                                                                |          |     |                         |                                   |                             |     |                  |                                                                                                                                                                                                                                                                                                                                                              |          |     |                 |                  |                |        |                  |                                                                                                                                                                                                                                                                                                                                                                                                                                                                                                                                                                                                                                                                                                                                                                                                                                                                                                                                                                                                                                                                                                                                                                |          |
| Tocilizumab 8mg                      | Abatacept                   | ACR20 response        | 24W-6M                  | 2.17 (1.01-4.89)        |                                      |                             |                       |                         |                                                                                                                                                                                                                                                                                                                                                                                                                                                                                                                                                                                                                                                                                                                                                                                                                                                                                                                                                                                                                                                                                                                                |          |     |                         |                                   |                             |     |                  |                                                                                                                                                                                                                                                                                                                                                              |          |     |                 |                  |                |        |                  |                                                                                                                                                                                                                                                                                                                                                                                                                                                                                                                                                                                                                                                                                                                                                                                                                                                                                                                                                                                                                                                                                                                                                                |          |
| Tocilizumab 8mg                      | Tocilizumab 4mg             | ACR20 response        | 24W-6M                  | 2.29 (1.47-3.61)        |                                      |                             |                       |                         |                                                                                                                                                                                                                                                                                                                                                                                                                                                                                                                                                                                                                                                                                                                                                                                                                                                                                                                                                                                                                                                                                                                                |          |     |                         |                                   |                             |     |                  |                                                                                                                                                                                                                                                                                                                                                              |          |     |                 |                  |                |        |                  |                                                                                                                                                                                                                                                                                                                                                                                                                                                                                                                                                                                                                                                                                                                                                                                                                                                                                                                                                                                                                                                                                                                                                                |          |
| Tocilizumab 8mg                      | Tocilizumab 8mg             | ACR20 response        | 24W-6M                  | 2.40 (1.09-5.41)        |                                      |                             |                       |                         |                                                                                                                                                                                                                                                                                                                                                                                                                                                                                                                                                                                                                                                                                                                                                                                                                                                                                                                                                                                                                                                                                                                                |          |     |                         |                                   |                             |     |                  |                                                                                                                                                                                                                                                                                                                                                              |          |     |                 |                  |                |        |                  |                                                                                                                                                                                                                                                                                                                                                                                                                                                                                                                                                                                                                                                                                                                                                                                                                                                                                                                                                                                                                                                                                                                                                                |          |
| Tocilizumab 8mg                      | Tocilizumab 8mg             | ACR20 response        | 24W-6M                  | 2.74 (1.26-6.27)        |                                      |                             |                       |                         |                                                                                                                                                                                                                                                                                                                                                                                                                                                                                                                                                                                                                                                                                                                                                                                                                                                                                                                                                                                                                                                                                                                                |          |     |                         |                                   |                             |     |                  |                                                                                                                                                                                                                                                                                                                                                              |          |     |                 |                  |                |        |                  |                                                                                                                                                                                                                                                                                                                                                                                                                                                                                                                                                                                                                                                                                                                                                                                                                                                                                                                                                                                                                                                                                                                                                                |          |
| Tofacitinib 5mg                      | Placebo                     | ACR20 response        | 24W-6M                  | 3.30 (1.95-5.66)        |                                      |                             |                       |                         |                                                                                                                                                                                                                                                                                                                                                                                                                                                                                                                                                                                                                                                                                                                                                                                                                                                                                                                                                                                                                                                                                                                                |          |     |                         |                                   |                             |     |                  |                                                                                                                                                                                                                                                                                                                                                              |          |     |                 |                  |                |        |                  |                                                                                                                                                                                                                                                                                                                                                                                                                                                                                                                                                                                                                                                                                                                                                                                                                                                                                                                                                                                                                                                                                                                                                                |          |
| Tofacitinib 10mg                     | Placebo                     | ACR20 response        | 24W-6M                  | 3.76 (2.24-6.50)        |                                      |                             |                       |                         |                                                                                                                                                                                                                                                                                                                                                                                                                                                                                                                                                                                                                                                                                                                                                                                                                                                                                                                                                                                                                                                                                                                                |          |     |                         |                                   |                             |     |                  |                                                                                                                                                                                                                                                                                                                                                              |          |     |                 |                  |                |        |                  |                                                                                                                                                                                                                                                                                                                                                                                                                                                                                                                                                                                                                                                                                                                                                                                                                                                                                                                                                                                                                                                                                                                                                                |          |
| Tocilizumab 4mg                      | Placebo                     | ACR20 response        | 24W-6M                  | 3.94 (2.19-7.48)        |                                      |                             |                       |                         |                                                                                                                                                                                                                                                                                                                                                                                                                                                                                                                                                                                                                                                                                                                                                                                                                                                                                                                                                                                                                                                                                                                                |          |     |                         |                                   |                             |     |                  |                                                                                                                                                                                                                                                                                                                                                              |          |     |                 |                  |                |        |                  |                                                                                                                                                                                                                                                                                                                                                                                                                                                                                                                                                                                                                                                                                                                                                                                                                                                                                                                                                                                                                                                                                                                                                                |          |
| Abatacept                            | Placebo                     | ACR20 response        | 24W-6M                  | 4.15 (2.58-7.00)        |                                      |                             |                       |                         |                                                                                                                                                                                                                                                                                                                                                                                                                                                                                                                                                                                                                                                                                                                                                                                                                                                                                                                                                                                                                                                                                                                                |          |     |                         |                                   |                             |     |                  |                                                                                                                                                                                                                                                                                                                                                              |          |     |                 |                  |                |        |                  |                                                                                                                                                                                                                                                                                                                                                                                                                                                                                                                                                                                                                                                                                                                                                                                                                                                                                                                                                                                                                                                                                                                                                                |          |
| Rituximab                            | Placebo                     | ACR20 response        | 24W-6M                  | 4.73 (3.14-7.27)        |                                      |                             |                       |                         |                                                                                                                                                                                                                                                                                                                                                                                                                                                                                                                                                                                                                                                                                                                                                                                                                                                                                                                                                                                                                                                                                                                                |          |     |                         |                                   |                             |     |                  |                                                                                                                                                                                                                                                                                                                                                              |          |     |                 |                  |                |        |                  |                                                                                                                                                                                                                                                                                                                                                                                                                                                                                                                                                                                                                                                                                                                                                                                                                                                                                                                                                                                                                                                                                                                                                                |          |
| Tocilizumab 8mg                      | Placebo                     | ACR20 response        | 24W-6M                  | 9.04 (5.15-17.08)       |                                      |                             |                       |                         |                                                                                                                                                                                                                                                                                                                                                                                                                                                                                                                                                                                                                                                                                                                                                                                                                                                                                                                                                                                                                                                                                                                                |          |     |                         |                                   |                             |     |                  |                                                                                                                                                                                                                                                                                                                                                              |          |     |                 |                  |                |        |                  |                                                                                                                                                                                                                                                                                                                                                                                                                                                                                                                                                                                                                                                                                                                                                                                                                                                                                                                                                                                                                                                                                                                                                                |          |
| <b>Tofacitinib</b>                   | <b>Placebo</b>              | <b>ACR70 response</b> | <b>12W</b>              | <b>3.80 (2.05-6.80)</b> |                                      |                             |                       |                         |                                                                                                                                                                                                                                                                                                                                                                                                                                                                                                                                                                                                                                                                                                                                                                                                                                                                                                                                                                                                                                                                                                                                |          |     |                         |                                   |                             |     |                  |                                                                                                                                                                                                                                                                                                                                                              |          |     |                 |                  |                |        |                  |                                                                                                                                                                                                                                                                                                                                                                                                                                                                                                                                                                                                                                                                                                                                                                                                                                                                                                                                                                                                                                                                                                                                                                |          |
| <b>Vieira, 2016</b> SLR: RCTs 5 2136 | Inadequate response to TNFI | NR                    | 9.6-13.0Y (range)       | Tofactinib              | Placebo                              | ACR70 response              | 24W                   | 5.77 (3.26-9.84)        | OR-1 favours tofacitinib; Efficacy of tofacitinib comparable with bDMARDs<br>OR-1 favours tofacitinib; Network meta-analysis<br>OR-1 favours tofacitinib<br>OR-1 favours tofacitinib<br>OR-1 favours tofacitinib<br>OR-1 favours tofacitinib<br>OR-1 favours tofacitinib<br>OR-1 favours tofacitinib                                                                                                                                                                                                                                                                                                                                                                                                                                                                                                                                                                                                                                                                                                                                                                                                                           | Moderate | Low |                         |                                   |                             |     |                  |                                                                                                                                                                                                                                                                                                                                                              |          |     |                 |                  |                |        |                  |                                                                                                                                                                                                                                                                                                                                                                                                                                                                                                                                                                                                                                                                                                                                                                                                                                                                                                                                                                                                                                                                                                                                                                |          |
|                                      |                             |                       |                         |                         | Abatacept                            | ACR70 response              | 12W                   | ns                      |                                                                                                                                                                                                                                                                                                                                                                                                                                                                                                                                                                                                                                                                                                                                                                                                                                                                                                                                                                                                                                                                                                                                |          |     |                         |                                   |                             |     |                  |                                                                                                                                                                                                                                                                                                                                                              |          |     |                 |                  |                |        |                  |                                                                                                                                                                                                                                                                                                                                                                                                                                                                                                                                                                                                                                                                                                                                                                                                                                                                                                                                                                                                                                                                                                                                                                |          |
|                                      |                             |                       |                         |                         | Golimumab                            | ACR70 response              | 14W                   | ns                      |                                                                                                                                                                                                                                                                                                                                                                                                                                                                                                                                                                                                                                                                                                                                                                                                                                                                                                                                                                                                                                                                                                                                |          |     |                         |                                   |                             |     |                  |                                                                                                                                                                                                                                                                                                                                                              |          |     |                 |                  |                |        |                  |                                                                                                                                                                                                                                                                                                                                                                                                                                                                                                                                                                                                                                                                                                                                                                                                                                                                                                                                                                                                                                                                                                                                                                |          |
|                                      |                             |                       |                         |                         | Tocilizumab                          | ACR70 response              | 24W                   | 1.50 (0.70-3.25)        |                                                                                                                                                                                                                                                                                                                                                                                                                                                                                                                                                                                                                                                                                                                                                                                                                                                                                                                                                                                                                                                                                                                                |          |     |                         |                                   |                             |     |                  |                                                                                                                                                                                                                                                                                                                                                              |          |     |                 |                  |                |        |                  |                                                                                                                                                                                                                                                                                                                                                                                                                                                                                                                                                                                                                                                                                                                                                                                                                                                                                                                                                                                                                                                                                                                                                                |          |
|                                      |                             |                       |                         |                         | Rituximab                            | ACR70 response              | 12W                   | ns                      |                                                                                                                                                                                                                                                                                                                                                                                                                                                                                                                                                                                                                                                                                                                                                                                                                                                                                                                                                                                                                                                                                                                                |          |     |                         |                                   |                             |     |                  |                                                                                                                                                                                                                                                                                                                                                              |          |     |                 |                  |                |        |                  |                                                                                                                                                                                                                                                                                                                                                                                                                                                                                                                                                                                                                                                                                                                                                                                                                                                                                                                                                                                                                                                                                                                                                                |          |
|                                      |                             |                       |                         |                         | Rituximab                            | ACR70 response              | 24W                   | 0.53 (0.27-1.02)        |                                                                                                                                                                                                                                                                                                                                                                                                                                                                                                                                                                                                                                                                                                                                                                                                                                                                                                                                                                                                                                                                                                                                |          |     |                         |                                   |                             |     |                  |                                                                                                                                                                                                                                                                                                                                                              |          |     |                 |                  |                |        |                  |                                                                                                                                                                                                                                                                                                                                                                                                                                                                                                                                                                                                                                                                                                                                                                                                                                                                                                                                                                                                                                                                                                                                                                |          |

|                                                                    |                               |      |                               |                                                               |                  |                                                                          |                          |                                                                         |                          |                                      |                         |                    |                                                                                                                                                                        |                        |          |      |
|--------------------------------------------------------------------|-------------------------------|------|-------------------------------|---------------------------------------------------------------|------------------|--------------------------------------------------------------------------|--------------------------|-------------------------------------------------------------------------|--------------------------|--------------------------------------|-------------------------|--------------------|------------------------------------------------------------------------------------------------------------------------------------------------------------------------|------------------------|----------|------|
|                                                                    |                               |      |                               |                                                               |                  | Rituximab                                                                |                          | ACR20 response                                                          | 24W                      |                                      | ns                      |                    | OR-1 favours tofacitinib                                                                                                                                               |                        |          |      |
|                                                                    |                               |      |                               |                                                               |                  |                                                                          |                          | ACR20 response                                                          | 12W                      |                                      | ns                      |                    | OR-1 favours tofacitinib                                                                                                                                               |                        |          |      |
|                                                                    |                               |      |                               |                                                               |                  |                                                                          |                          | ACR20 response                                                          | 24W                      |                                      | 0.53 (0.27-1.02)        |                    | OR-1 favours tofacitinib                                                                                                                                               |                        |          |      |
| <b>Tofacitinib - different doses</b>                               |                               |      |                               |                                                               |                  |                                                                          |                          |                                                                         |                          |                                      |                         |                    |                                                                                                                                                                        |                        |          |      |
| Lee, 2016                                                          | SLR; RCTs 4                   | 1796 | Inadequate response to TNFI   | NR                                                            | NR               | Tocilizumab 4mg                                                          | Tofacitinib 10mg         | ACR20 response                                                          | 24W-6M                   |                                      | 1.05 (0.47-2.39)        |                    | OR-1 favours tocilizumab 4mg; Tocilizumab highest performance regarding early good response based on ACR20 response, followed by rituximab, abatacept and tofacitinib. | Moderate               | Low      |      |
|                                                                    |                               |      |                               |                                                               |                  | Abatacept                                                                | Tocilizumab 4mg          | ACR20 response                                                          | 24W-6M                   |                                      | 1.06 (0.46-2.28)        |                    | OR-1 favours abatacept                                                                                                                                                 |                        |          |      |
|                                                                    |                               |      |                               |                                                               |                  | Abatacept                                                                | Tofacitinib 10mg         | ACR20 response                                                          | 24W-6M                   |                                      | 1.10 (0.54-2.31)        |                    | OR-1 favours abatacept                                                                                                                                                 |                        |          |      |
|                                                                    |                               |      |                               |                                                               |                  | Rituximab                                                                | Abatacept                | ACR20 response                                                          | 24W-6M                   |                                      | 1.14 (0.59-2.15)        |                    | OR-1 favours rituximab                                                                                                                                                 |                        |          |      |
|                                                                    |                               |      |                               |                                                               |                  | <b>Tofacitinib 10mg</b>                                                  | <b>Tofacitinib 5mg</b>   | <b>ACR20 response</b>                                                   | <b>24W-6M</b>            |                                      | <b>1.14 (0.71-1.86)</b> |                    | OR-1 favours tofacitinib 10mg                                                                                                                                          |                        |          |      |
|                                                                    |                               |      |                               |                                                               |                  | Rituximab                                                                | Tocilizumab 4mg          | ACR20 response                                                          | 24W-6M                   |                                      | 1.20 (0.56-2.50)        |                    | OR-1 favours rituximab                                                                                                                                                 |                        |          |      |
|                                                                    |                               |      |                               |                                                               |                  | Tocilizumab 4mg                                                          | Tofacitinib 5mg          | ACR20 response                                                          | 24W-6M                   |                                      | 1.20 (0.54-2.75)        |                    | OR-1 favours tocilizumab 4mg                                                                                                                                           |                        |          |      |
|                                                                    |                               |      |                               |                                                               |                  | Rituximab                                                                | Tofacitinib 10mg         | ACR20 response                                                          | 24W-6M                   |                                      | 1.26 (0.64-2.46)        |                    | OR-1 favours rituximab                                                                                                                                                 |                        |          |      |
|                                                                    |                               |      |                               |                                                               |                  | Abatacept                                                                | Tofacitinib 5mg          | ACR20 response                                                          | 24W-6M                   |                                      | 1.26 (0.61-2.63)        |                    | OR-1 favours abatacept                                                                                                                                                 |                        |          |      |
|                                                                    |                               |      |                               |                                                               |                  | Rituximab                                                                | Tofacitinib 5mg          | ACR20 response                                                          | 24W-6M                   |                                      | 1.44 (0.73-2.82)        |                    | OR-1 favours rituximab                                                                                                                                                 |                        |          |      |
|                                                                    |                               |      |                               |                                                               |                  | Tocilizumab 8mg                                                          | Rituximab                | ACR20 response                                                          | 24W-6M                   |                                      | 1.92 (0.93-4.04)        |                    | OR-1 favours tocilizumab 8mg                                                                                                                                           |                        |          |      |
|                                                                    |                               |      |                               |                                                               |                  | Tocilizumab 8mg                                                          | Abatacept                | ACR20 response                                                          | 24W-6M                   |                                      | 2.17 (1.01-4.89)        |                    | OR-1 favours tocilizumab 8mg                                                                                                                                           |                        |          |      |
|                                                                    |                               |      |                               |                                                               |                  | Tocilizumab 8mg                                                          | Tocilizumab 4mg          | ACR20 response                                                          | 24W-6M                   |                                      | 2.29 (1.17-4.51)        |                    | OR-1 favours tocilizumab 8mg                                                                                                                                           |                        |          |      |
|                                                                    |                               |      |                               |                                                               |                  | Tocilizumab 8mg                                                          | Tofacitinib 10mg         | ACR20 response                                                          | 24W-6M                   |                                      | 2.40 (1.09-5.41)        |                    | OR-1 favours tocilizumab 8mg                                                                                                                                           |                        |          |      |
|                                                                    |                               |      |                               |                                                               |                  | Tocilizumab 8mg                                                          | Tofacitinib 5mg          | ACR20 response                                                          | 24W-6M                   |                                      | 2.74 (1.26-6.27)        |                    | OR-1 favours tocilizumab 8mg                                                                                                                                           |                        |          |      |
|                                                                    |                               |      |                               |                                                               |                  | Tofacitinib 5mg                                                          | Placebo                  | ACR20 response                                                          | 24W-6M                   |                                      | 3.30 (1.95-5.66)        |                    | OR-1 favours tofacitinib 5mg                                                                                                                                           |                        |          |      |
|                                                                    |                               |      |                               |                                                               |                  | Tofacitinib 10mg                                                         | Placebo                  | ACR20 response                                                          | 24W-6M                   |                                      | 3.76 (2.24-6.50)        |                    | OR-1 favours tofacitinib 10mg                                                                                                                                          |                        |          |      |
|                                                                    |                               |      |                               |                                                               |                  | Tocilizumab 4mg                                                          | Placebo                  | ACR20 response                                                          | 24W-6M                   |                                      | 3.94 (2.19-7.48)        |                    | OR-1 favours tocilizumab 4mg                                                                                                                                           |                        |          |      |
|                                                                    |                               |      |                               |                                                               |                  | Abatacept                                                                | Placebo                  | ACR20 response                                                          | 24W-6M                   |                                      | 4.15 (2.58-7.00)        |                    | OR-1 favours abatacept                                                                                                                                                 |                        |          |      |
|                                                                    |                               |      |                               |                                                               |                  | Rituximab                                                                | Placebo                  | ACR20 response                                                          | 24W-6M                   |                                      | 4.73 (3.14-7.27)        |                    | OR-1 favours rituximab                                                                                                                                                 |                        |          |      |
|                                                                    |                               |      |                               |                                                               |                  | Tocilizumab 8mg                                                          | Placebo                  | ACR20 response                                                          | 24W-6M                   |                                      | 9.04 (5.15-17.08)       |                    | OR-1 favours tocilizumab 8mg                                                                                                                                           |                        |          |      |
| <b>Other</b>                                                       |                               |      |                               |                                                               |                  |                                                                          |                          |                                                                         |                          |                                      |                         |                    |                                                                                                                                                                        |                        |          |      |
| Al-Gareeb, 2018                                                    | RCT                           | 110  | Failure of entanercept        | DAS28-ESR 5.22 (intervention 5.51, comparator 4.89, p<0.001)  | -                | Nicosamide (2 capsules one daily for 8 weeks), in addition to etanercept | 48                       | Placebo (2 capsules one daily for 8 weeks), in addition to etanercept   | 41                       | Change in DAS28-ESR from BL until 8W |                         | -10.16% (SEM 1.89) | 5.11% (SEM 2.28)                                                                                                                                                       | p<0.001                | Moderate |      |
| <b>EFFICACY OF B/TSDMARDS BY NUMBER OF PREVIOUS FAILED BDMARDS</b> |                               |      |                               |                                                               |                  |                                                                          |                          |                                                                         |                          |                                      |                         |                    |                                                                                                                                                                        |                        |          |      |
| <b>TNFI</b>                                                        |                               |      |                               |                                                               |                  |                                                                          |                          |                                                                         |                          |                                      |                         |                    |                                                                                                                                                                        |                        |          |      |
| Smolen, 2014                                                       | Subanalysis RCT (Subanalysis) | 461  | Failure of ≥1 TNFI            | DAS28 median 6.1-6.3; HAQ-DI median 1.5-1.8                   | 8.7-9.8Y, median | Failure of 1 TNFI: Golimumab (50 or 100mg q4w, subcutaneous)             | 137                      | Failure of 2 TNFIs: Golimumab (50 or 100mg q4w, subcutaneous)           | 47                       | ACR20 response                       | 24W                     | 61 (44.5%)         | 17 (36.2%)                                                                                                                                                             |                        | High     |      |
|                                                                    |                               |      |                               |                                                               |                  |                                                                          |                          |                                                                         |                          | ACR50 response                       | 24W                     | 30 (21.9%)         | 11 (23.4%)                                                                                                                                                             |                        |          |      |
|                                                                    |                               |      |                               |                                                               |                  |                                                                          |                          |                                                                         |                          | EULAR good/moderate response         | 24W                     | 82 (59.9%)         | 24 (51.1%)                                                                                                                                                             |                        |          |      |
|                                                                    |                               |      |                               |                                                               |                  |                                                                          |                          |                                                                         |                          | HAQ-DI ≥0.25-unit improvement        | 24W                     | 73 (53.3%)         | 22 (46.8%)                                                                                                                                                             |                        |          |      |
|                                                                    |                               |      |                               |                                                               |                  | Failure of 1 TNFI: Golimumab (50 or 100mg q4w, subcutaneous)             | 137                      | Failure of 3 TNFIs: Golimumab (50 or 100mg q4w, subcutaneous)           | 17                       | ACR20 response                       | 24W                     | 61 (44.5%)         | 4 (23.5%)                                                                                                                                                              |                        |          |      |
|                                                                    |                               |      |                               |                                                               |                  |                                                                          |                          |                                                                         |                          | ACR50 response                       | 24W                     | 30 (21.9%)         | 1 (5.9%)                                                                                                                                                               |                        |          |      |
|                                                                    |                               |      |                               |                                                               |                  |                                                                          |                          |                                                                         |                          | EULAR good/moderate response         | 24W                     | 82 (59.9%)         | 10 (58.8%)                                                                                                                                                             |                        |          |      |
|                                                                    |                               |      |                               |                                                               |                  |                                                                          |                          |                                                                         |                          | HAQ-DI ≥0.25-unit improvement        | 24W                     | 73 (53.3%)         | 7 (41.2%)                                                                                                                                                              |                        |          |      |
| <b>Abatacept</b>                                                   |                               |      |                               |                                                               |                  |                                                                          |                          |                                                                         |                          |                                      |                         |                    |                                                                                                                                                                        |                        |          |      |
| Schiff, 2009                                                       | Subanalysis RCT (Subanalysis) | 1046 | Failure of TNFI               | DAS28-CRP 6.2 (0.7); HAQ-DI 1.7 (0.6)                         | 11.6Y            | Failure of 1 TNFI: Abatacept (10mg/kg on days 1, 15 and 29, then q4w)    | 488                      | Failure of ≥2 TNFIs: Abatacept (10mg/kg on days 1, 15 and 29, then q4w) | 540                      | DAS28                                | Change from BL until 6M |                    | -2.1 (95%CI -2.2 -2.0)                                                                                                                                                 | -2.0 (95%CI -2.1 -1.8) |          | High |
|                                                                    |                               |      |                               |                                                               |                  | Failure of 1 TNFI: Abatacept (10mg/kg on days 1, 15 and 29, then q4w)    | 488                      | Failure of 3 TNFIs: Abatacept (10mg/kg on days 1, 15 and 29, then q4w)  | 200                      | DAS28                                | Change from BL until 6M |                    | -2.1 (95%CI -2.2 -2.0)                                                                                                                                                 | -1.7 (95%CI -1.9 -1.5) | s        |      |
| <b>Rituximab</b>                                                   |                               |      |                               |                                                               |                  |                                                                          |                          |                                                                         |                          |                                      |                         |                    |                                                                                                                                                                        |                        |          |      |
| Harrod, 2015b                                                      | Non-RCT                       | 265  | Failure of TNFI               | CDAI: Previous 1 TNFI: 17.5; Previous ≥2 TNFI: 24.4 (p<0.001) | 13Y              | Rituximab: Previous exposure 1 TNFI                                      | 114 (trimmed population) | Rituximab: Previous exposure ≥2 TNFI                                    | 151 (trimmed population) | CDAI                                 | 12M                     | 13.2               | 18.3                                                                                                                                                                   |                        | High     |      |
| <b>Tocilizumab</b>                                                 |                               |      |                               |                                                               |                  |                                                                          |                          |                                                                         |                          |                                      |                         |                    |                                                                                                                                                                        |                        |          |      |
| Emery, 2008                                                        | Subanalysis RCT (Subanalysis) | 176  | Failure of 2 TNFIs            |                                                               | NR               | Tocilizumab (8mg/kg, q4w, intravenous)                                   | 52                       | Placebo                                                                 | 64                       | ACR20 response                       | 24W                     | 26 (50.0%)         | 7 (10.9%)                                                                                                                                                              |                        | High     |      |
|                                                                    |                               |      |                               |                                                               |                  |                                                                          |                          |                                                                         |                          | ACR50 response                       | 24W                     | 16 (30.8%)         | 1 (1.6%)                                                                                                                                                               |                        |          |      |
|                                                                    |                               |      |                               |                                                               |                  |                                                                          |                          |                                                                         |                          | ACR20 response                       | 24W                     | 8 (15.4%)          | 0 (0.0%)                                                                                                                                                               |                        |          |      |
|                                                                    |                               |      |                               |                                                               |                  | Tocilizumab (4mg/kg, q4w, intravenous)                                   | 60                       | Placebo                                                                 | 64                       | ACR20 response                       | 24W                     | 17 (28.3%)         | 7 (10.9%)                                                                                                                                                              |                        |          |      |
|                                                                    |                               |      |                               |                                                               |                  |                                                                          |                          |                                                                         |                          | ACR50 response                       | 24W                     | 8 (13.3%)          | 1 (1.6%)                                                                                                                                                               |                        |          |      |
|                                                                    |                               |      |                               |                                                               |                  |                                                                          |                          |                                                                         |                          | ACR20 response                       | 24W                     | 2 (3.3%)           | 0 (0.0%)                                                                                                                                                               |                        |          |      |
|                                                                    |                               |      |                               |                                                               |                  | Tocilizumab (8mg, kg, q4w, intravenous)                                  | 26                       | Placebo                                                                 | 18                       | ACR20 response                       | 24W                     | 14 (53.8%)         | 1 (5.6%)                                                                                                                                                               |                        |          |      |
|                                                                    |                               |      |                               |                                                               |                  |                                                                          |                          |                                                                         |                          | ACR50 response                       | 24W                     | 5 (19.2%)          | 0 (0.0%)                                                                                                                                                               |                        |          |      |
|                                                                    |                               |      |                               |                                                               |                  |                                                                          |                          |                                                                         |                          | ACR20 response                       | 24W                     | 2 (7.7%)           | 0 (0.0%)                                                                                                                                                               |                        |          |      |
|                                                                    |                               |      |                               |                                                               |                  | Tocilizumab (4mg/kg, q4w, intravenous)                                   | 18                       | Placebo                                                                 | 18                       | ACR20 response                       | 24W                     | 4 (22.2%)          | 1 (5.6%)                                                                                                                                                               |                        |          |      |
|                                                                    |                               |      |                               |                                                               |                  |                                                                          |                          |                                                                         |                          | ACR50 response                       | 24W                     | 4 (22.2%)          | 0 (0.0%)                                                                                                                                                               |                        |          |      |
|                                                                    |                               |      |                               |                                                               |                  |                                                                          |                          |                                                                         |                          | ACR20 response                       | 24W                     | 0 (0.0%)           | 0 (0.0%)                                                                                                                                                               |                        |          |      |
| <b>Tofacitinib</b>                                                 |                               |      |                               |                                                               |                  |                                                                          |                          |                                                                         |                          |                                      |                         |                    |                                                                                                                                                                        |                        |          |      |
| Burmester, 2013                                                    | Subanalysis RCT (Subanalysis) | 399  | Inadequate response to 1 TNFI |                                                               | NR               | Tofacitinib (5mg 2/D, oral)                                              | 83                       | Placebo                                                                 | 85                       | ACR20 response                       | 3M                      | 36 (43.4%)         | 26 (30.6%)                                                                                                                                                             |                        | High     |      |
|                                                                    |                               |      |                               |                                                               |                  | Inadequate response to 2 TNFI                                            | NR                       | NR                                                                      | 37                       | ACR20 response                       | 3M                      | 14 (37.8%)         | 4 (10.8%)                                                                                                                                                              |                        |          |      |
|                                                                    |                               |      |                               |                                                               |                  | Inadequate response to ≥3 TNFI                                           | NR                       | NR                                                                      | 11                       | ACR20 response                       | 3M                      | 4 (36.4%)          | 2 (22.2%)                                                                                                                                                              |                        |          |      |
|                                                                    |                               |      |                               |                                                               |                  | Inadequate response to 1 TNFI                                            | NR                       | NR                                                                      | 89                       | ACR20 response                       | 3M                      | 43 (48.9%)         | 26 (30.6%)                                                                                                                                                             |                        |          |      |
|                                                                    |                               |      |                               |                                                               |                  | Inadequate response to 2 TNFI                                            | NR                       | NR                                                                      | 30                       | ACR20 response                       | 3M                      | 16 (53.3%)         | 4 (10.8%)                                                                                                                                                              |                        |          |      |
|                                                                    |                               |      |                               |                                                               |                  | Inadequate response to ≥3 TNFI                                           | NR                       | NR                                                                      | 12                       | ACR20 response                       | 3M                      | 5 (41.7%)          | 2 (22.2%)                                                                                                                                                              |                        |          |      |



|                                                                                           |                      |                           |       |                    |                               |                               |          |                |                           |                 |          |          |                |          |          |          |         |         |
|-------------------------------------------------------------------------------------------|----------------------|---------------------------|-------|--------------------|-------------------------------|-------------------------------|----------|----------------|---------------------------|-----------------|----------|----------|----------------|----------|----------|----------|---------|---------|
| Charles-Schoeman, 2017*<br>(Subanalysis of see also below, failure ≥1bDMARD)              | Subanalysis 838 RCT  | Failure of 1bDMARD        | NR    | NR                 | Tofacitinib (5mg, 2/D, oral)  | NR                            | Placebo  | NR             | ACR20 response            | 3M              | 45.3%    | 27.2%    | p<0.05         | High     |          |          |         |         |
|                                                                                           |                      |                           |       |                    | DAS28-ESR ≤3.2                | NR                            | Placebo  | NR             | ACR20 response            | 3M              | 11.9%    | 5.8%     | ns             |          |          |          |         |         |
|                                                                                           |                      |                           |       |                    | Failure of ≥2bDMARDs          | Tofacitinib (5mg, 2/D, oral)  | NR       | Placebo        | NR                        | ACR20 response  | 3M       | 40.6%    | 20.0%          |          | p<0.05   |          |         |         |
|                                                                                           |                      |                           |       |                    | Failure of 1bDMARD            | Tofacitinib (10mg, 2/D, oral) | NR       | Placebo        | NR                        | DAS28-ESR ≤3.2  | 3M       | 14.0%    | 3.4%           |          | p<0.05   |          |         |         |
|                                                                                           |                      |                           |       |                    | Failure of ≥2bDMARDs          | Tofacitinib (10mg, 2/D, oral) | NR       | Placebo        | NR                        | ACR20 response  | 3M       | 50.6%    | 27.2%          |          | p<0.0001 |          |         |         |
|                                                                                           |                      |                           |       |                    | Tofacitinib (10mg, 2/D, oral) | NR                            | Placebo  | NR             | DAS28-ESR ≤3.2            | 3M              | 15.7%    | 5.8%     | p<0.05         |          |          |          |         |         |
|                                                                                           |                      |                           |       |                    | Tofacitinib (10mg, 2/D, oral) | NR                            | Placebo  | NR             | ACR20 response            | 3M              | 50.6%    | 20.0%    | p<0.0001       |          |          |          |         |         |
|                                                                                           |                      |                           |       |                    | Tofacitinib (10mg, 2/D, oral) | NR                            | Placebo  | NR             | DAS28-ESR ≤3.2            | 3M              | 16.5%    | 3.4%     | p<0.05         |          |          |          |         |         |
| Baricitinib<br>Genovese, 2018a<br>(Subanalysis of Genovese, 2016 (see also below, failure | Subanalysis 211 RCT  | Failure of 1 TNF $\alpha$ | NR    | NR                 | Baricitinib (2mg/D, oral)     | 102                           | Placebo  | 104            | ACR20 response            | 12W             | 54 (53%) | 31 (30%) | p<0.001        | High     |          |          |         |         |
|                                                                                           |                      |                           |       |                    | CDAI $\leq$ 10                | 12W                           | 25 (25%) | 16 (15%)       | p<0.01                    |                 |          |          |                |          |          |          |         |         |
|                                                                                           |                      |                           |       |                    | Baricitinib (4mg/D, oral)     | 104                           | Placebo  | 104            | ACR20 response            | 12W             | 58 (56%) | 9 (18%)  | p<0.001        |          |          |          |         |         |
|                                                                                           |                      |                           |       |                    | CDAI $\leq$ 10                | 12W                           | 34 (33%) | 16 (15%)       | p<0.001                   |                 |          |          |                |          |          |          |         |         |
|                                                                                           |                      |                           |       |                    | 211                           | Failure of ≥2 TNF $\alpha$    | NR       | NR             | Baricitinib (2mg/D, oral) | 43              | Placebo  | 69       | ACR20 response |          | 12W      | 19 (38%) | 6 (13%) | p<0.001 |
|                                                                                           |                      |                           |       |                    |                               |                               |          |                | CDAI $\leq$ 10            | 12W             | 1 (2%)   | 9 (18%)  | p<0.01         |          |          |          |         |         |
|                                                                                           |                      |                           |       |                    |                               |                               |          |                | Baricitinib (4mg/D, oral) | 54              | Placebo  | 69       | ACR20 response |          | 12W      | 24 (53%) | 6 (13%) | p<0.001 |
|                                                                                           |                      |                           |       |                    | Baricitinib (4mg/D, oral)     | 54                            | Placebo  | 69             | CDAI $\leq$ 10            | 12W             | 1 (2%)   | 9 (20%)  | p<0.05         |          |          |          |         |         |
| Upadactinib<br>Weinblatt, 2019*<br>(Subanalysis Genovese, 2018b)                          | Subanalysis 235 RCT  | Failure of 1 bDMARD       | NR    | NR                 | Upadactinib 15mg/D            | 86                            | Placebo  | 83             | ACR20 response            | 12W             | 61.6%    | 28.9%    | p<0.001        | High     |          |          |         |         |
|                                                                                           |                      |                           |       |                    | ACR50 response                | 12W                           | 32.6%    | 0.12           | p<0.01                    |                 |          |          |                |          |          |          |         |         |
|                                                                                           |                      |                           |       |                    | ACR70 response                | 12W                           | 14.0%    | 7.2%           | ns                        |                 |          |          |                |          |          |          |         |         |
|                                                                                           |                      |                           |       |                    | DAS28-CRP ≤3.2                | 12W                           | 0.43     | 16.9%          | p<0.001                   |                 |          |          |                |          |          |          |         |         |
|                                                                                           |                      |                           |       |                    | CDAI $\leq$ 10                | 12W                           | 32.6%    | 15.7%          | p<0.01                    |                 |          |          |                |          |          |          |         |         |
|                                                                                           |                      |                           |       |                    |                               |                               |          |                |                           | CDAI $\leq$ 2.8 | 12W      | 9.3%     | 6.0%           |          | ns       |          |         |         |
|                                                                                           |                      |                           |       |                    | Upadactinib 30mg/D            | 66                            | Placebo  | 83             | ACR20 response            | 12W             | 57.6%    | 28.9%    | p<0.001        |          |          |          |         |         |
|                                                                                           |                      |                           |       |                    | ACR50 response                | 12W                           | 39.4%    | 0.12           | p<0.001                   |                 |          |          |                |          |          |          |         |         |
|                                                                                           |                      |                           |       |                    | ACR70 response                | 12W                           | 27.3%    | 7.2%           | p<0.001                   |                 |          |          |                |          |          |          |         |         |
|                                                                                           |                      |                           |       |                    | DAS28-CRP ≤3.2                | 12W                           | 0.47     | 16.9%          | p<0.001                   |                 |          |          |                |          |          |          |         |         |
|                                                                                           |                      |                           |       |                    | CDAI $\leq$ 10                | 12W                           | 39.4%    | 15.7%          | p<0.001                   |                 |          |          |                |          |          |          |         |         |
|                                                                                           |                      |                           |       |                    |                               |                               |          |                |                           | CDAI $\leq$ 2.8 | 12W      | 18.2%    | 6.0%           |          | ns       |          |         |         |
|                                                                                           |                      |                           |       |                    | 137                           | Failure of 2 bDMARDs          | NR       | NR             | Upadactinib 15mg/D        | 40              | Placebo  | 46       | ACR20 response |          | 12W      | 70.0%    | 32.0%   | p<0.001 |
|                                                                                           |                      |                           |       |                    |                               |                               |          |                | ACR50 response            | 12W             | 32.5%    | 14.2%    | ns             |          |          |          |         |         |
|                                                                                           |                      |                           |       |                    |                               |                               |          |                | ACR70 response            | 12W             | 5.0%     | 8.7%     | ns             |          |          |          |         |         |
|                                                                                           |                      |                           |       |                    |                               |                               |          |                | DAS28-CRP ≤3.2            | 12W             | 45.0%    | 13.0%    | p<0.01         |          |          |          |         |         |
|                                                                                           |                      |                           |       |                    |                               |                               |          |                | CDAI $\leq$ 10            | 12W             | 27.5%    | 17.4%    | ns             |          |          |          |         |         |
|                                                                                           |                      |                           |       |                    |                               |                               |          |                | CDAI $\leq$ 2.8           | 12W             | 5.0%     | 4.3%     | ns             |          |          |          |         |         |
|                                                                                           |                      |                           |       |                    |                               |                               |          |                | Upadactinib 30mg/D        | 51              | Placebo  | 46       | ACR20 response |          | 12W      | 58.8%    | 32.6%   | p<0.01  |
|                                                                                           |                      |                           |       |                    | ACR50 response                | 12W                           | 35.3%    | 14.2%          | p<0.05                    |                 |          |          |                |          |          |          |         |         |
|                                                                                           |                      |                           |       |                    | ACR70 response                | 12W                           | 21.6     | 8.7%           | ns                        |                 |          |          |                |          |          |          |         |         |
| DAS28-CRP ≤3.2                                                                            | 12W                  | 37.3%                     | 13.0% | p<0.01             |                               |                               |          |                |                           |                 |          |          |                |          |          |          |         |         |
| CDAI $\leq$ 10                                                                            | 12W                  | 31.4%                     | 17.4% | ns                 |                               |                               |          |                |                           |                 |          |          |                |          |          |          |         |         |
| CDAI $\leq$ 2.8                                                                           | 12W                  | 5.9%                      | 4.3%  | ns                 |                               |                               |          |                |                           |                 |          |          |                |          |          |          |         |         |
| 125                                                                                       | Failure of ≥3 bDMARD | NR                        | NR    | Upadactinib 15mg/D | 38                            | Placebo                       | 40       | ACR20 response | 12W                       | 65.8%           | 22.5%    | p<0.001  |                |          |          |          |         |         |
|                                                                                           |                      |                           |       | ACR50 response     | 12W                           | 39.5%                         | 7.5%     | p<0.01         |                           |                 |          |          |                |          |          |          |         |         |
|                                                                                           |                      |                           |       | ACR70 response     | 12W                           | 13.2%                         | 2.5%     | ns             |                           |                 |          |          |                |          |          |          |         |         |
|                                                                                           |                      |                           |       | DAS28-CRP ≤3.2     | 12W                           | 42.1%                         | 10.0%    | p<0.01         |                           |                 |          |          |                |          |          |          |         |         |
|                                                                                           |                      |                           |       | CDAI $\leq$ 10     | 12W                           | 34.2%                         | 7.5%     | p<0.01         |                           |                 |          |          |                |          |          |          |         |         |
|                                                                                           |                      |                           |       | CDAI $\leq$ 2.8    | 12W                           | 7.9%                          | 2.5%     | ns             |                           |                 |          |          |                |          |          |          |         |         |
|                                                                                           |                      |                           |       | Upadactinib 30mg/D | 47                            | Placebo                       | 40       | ACR20 response | 12W                       | 51.1%           | 22.5%    | p<0.01   |                |          |          |          |         |         |
|                                                                                           |                      |                           |       | ACR50 response     | 12W                           | 29.8%                         | 7.5%     | p<0.01         |                           |                 |          |          |                |          |          |          |         |         |
|                                                                                           |                      |                           |       | ACR70 response     | 12W                           | 17.0%                         | 2.5%     | p<0.05         |                           |                 |          |          |                |          |          |          |         |         |
|                                                                                           |                      |                           |       | DAS28-CRP ≤3.2     | 12W                           | 40.4%                         | 10.0%    | p<0.01         |                           |                 |          |          |                |          |          |          |         |         |
|                                                                                           |                      |                           |       | CDAI $\leq$ 10     | 12W                           | 27.7%                         | 7.5%     | p<0.05         |                           |                 |          |          |                |          |          |          |         |         |
| CDAI $\leq$ 2.8                                                                           | 12W                  | 8.5%                      | 2.5%  | ns                 |                               |                               |          |                |                           |                 |          |          |                |          |          |          |         |         |
| Fingolimod<br>Genovese, 2019                                                              | Subanalysis 448 RCT  | Failure of 1 bDMARD       | NR    | NR                 | Fingolimod (100mg/D)          | 86                            | Placebo  | 77             | ACR20 response            | 12W             | 57.0%    | 36.4%    | p<0.001        | Moderate |          |          |         |         |
|                                                                                           |                      |                           |       |                    | Fingolimod (200mg/D)          | 73                            | Placebo  | 77             | ACR20 response            | 12W             | 61.6%    | 36.4%    | p<0.01         |          |          |          |         |         |
|                                                                                           |                      |                           |       |                    | Fingolimod (100mg/D)          | 33                            | Placebo  | 36             | ACR20 response            | 12W             | 57.6%    | 33.3%    | ns             |          |          |          |         |         |
|                                                                                           |                      |                           |       |                    | Fingolimod (200mg/D)          | 37                            | Placebo  | 36             | ACR20 response            | 12W             | 70.3%    | 33.3%    | p<0.01         |          |          |          |         |         |
|                                                                                           |                      |                           |       |                    | Fingolimod (100mg/D)          | 119                           | Placebo  | 114            | ACR20 response            | 12W             | 57.1%    | 35.1%    | p<0.05         |          |          |          |         |         |
|                                                                                           |                      |                           |       |                    | Fingolimod (200mg/D)          | 110                           | Placebo  | 114            | ACR20 response            | 12W             | 64.5     | 35.1%    | p<0.001        |          |          |          |         |         |
|                                                                                           |                      |                           |       |                    | Fingolimod (100mg/D)          | 34                            | Placebo  | 34             | ACR20 response            | 12W             | 58.8%    | 17.6%    | p<0.001        |          |          |          |         |         |
| Fingolimod (200mg/D)                                                                      | 37                   | Placebo                   | 34    | ACR20 response     | 12W                           | 70.3%                         | 17.6%    | p<0.001        |                           |                 |          |          |                |          |          |          |         |         |

ACR, American College of Rheumatology; bDMARD: biological disease modifying antirheumatic drug; BL: baseline; CDAI: clinical disease activity index; CI: confidence interval; CRP: reactive protein C; cDMARD: conventional synthetic disease modifying antirheumatic drug; D: day(s); DAS28: disease activity score assessing 28 joints; DMARD: disease modifying antirheumatic drug; ESR: erythrocyte sedimentation rate; EULAR: European League Against Rheumatism; HAQ(D): health assessment questionnaire (-disability index); LSM: least square mean; M: month(s); mACR: modified American College of Rheumatology response ( $\geq$ ...% improvement in tender jointcount and swollen joint count, as well as two or more of the four remaining ACR response components, including physician's global assessment, patient's global assessment, patient's global pain and mHAQ.); mDAS: modified disease activity score (which is calculated without results of acute phase reactants as well as achievement of remission using the mDAS28 cut-off of <2.6 (eg, baseline mDAS—follow-up mDAS)); mg: milligram; mHAQ: modified Health Assessment Questionnaire; n: number; NR: not reported; (n)-RCT: (non)-randomised controlled trial; ns: not significant; OR: odds ratio; q: w: every... weeks; RA: rheumatoid arthritis; SD: standard deviation; SDAI: simplified disease activity index; SLR: systematic literature review; TNF: TNF inhibitor; tDMARD: targeted synthetic disease modifying antirheumatic drug; W: week(s); Y: year(s); -: abstract.

1. Composite scores: Change over time, otherwise fixed time point, otherwise LDA, otherwise remission; 2. Latest time point during treatment period that was reported; 3. According to Cochrane Collaboration's tool for individual studies: highest risk of bias as found; According to AMSTAR2 tool for SLRs: Low-zero or one non-critical weakness; Moderate-more than one non-critical weakness; High-one critical flaw with or without non-critical weaknesses; Critically high-more than one critical flaw with or without non-critical weaknesses; 4. Only applicable for SLRs: Summary of RoB of individual studies, as assessed in SLR
