# Supplementary material for: Pharmacological and non-pharmacological therapeutic strategies in difficult-to-treat rheumatoid arthritis: a systematic literature review informing the EULAR recommendations for the management of difficult-to-treat rheumatoid arthritis
Source: HighWire-hosted journal article supplement (doi:10.1136/rmdopen-2020-001512), 2021-01-01
Supplement: rmdopen-2020-001512supp003_data_supplement.pdf [file rmdopen-2020-001512supp003_data_supplement.pdf]

Supplementary Table 3. Summary of studies on therapeutic strategies for RA patients with predominantly non-inflammatory complaints

| Study design<br>publication year | Patients<br>(total n) | General description of RA population |                                                                              |             |            |                                              |                           |      |      | Disease<br>duration of<br>RA (mean)                                                                                                                                        | Disease<br>activity at<br>baseline<br>(mean [SD])                                                                                                                    | Non-inflammatory complaints at baseline<br>HAQ (mean [SD])                   | VAS-pain<br>(mean [SD])                                                      | VAS-fatigue<br>(mean [SD])                                                 | EQ-5D<br>(mean [SD]) | Other                                   | Intervention group<br>Description | n | Comparator<br>Description | n | Outcome<br>Description | Time point*1 | Number and<br>percentage<br>of<br>responders<br>in<br>intervention<br>group | Number and<br>percentage<br>of<br>persons<br>in<br>control<br>group | OR<br>(95%<br>CI)              | Risk<br>ratio<br>(95% CI) | Risk<br>Difference<br>(95% CI) | Mean<br>outcome in<br>interventio<br>n group<br>(SD) | Mean<br>outcome in<br>control<br>group (SD) | Mean<br>difference<br>(standard<br>error, 95%<br>CI)           | p-value                                                                                              | Effect size<br>(Cohen's d)                                                                                                                                                                                                                                                                                              | Other                                                                                                                                           | Risk of<br>bias*2                                                                                             | Risk of bias<br>of individual<br>studies<br>included in<br>SLR*3                                              |          |      |  |
|----------------------------------|-----------------------|--------------------------------------|------------------------------------------------------------------------------|-------------|------------|----------------------------------------------|---------------------------|------|------|----------------------------------------------------------------------------------------------------------------------------------------------------------------------------|----------------------------------------------------------------------------------------------------------------------------------------------------------------------|------------------------------------------------------------------------------|------------------------------------------------------------------------------|----------------------------------------------------------------------------|----------------------|-----------------------------------------|-----------------------------------|---|---------------------------|---|------------------------|--------------|-----------------------------------------------------------------------------|---------------------------------------------------------------------|--------------------------------|---------------------------|--------------------------------|------------------------------------------------------|---------------------------------------------|----------------------------------------------------------------|------------------------------------------------------------------------------------------------------|-------------------------------------------------------------------------------------------------------------------------------------------------------------------------------------------------------------------------------------------------------------------------------------------------------------------------|-------------------------------------------------------------------------------------------------------------------------------------------------|---------------------------------------------------------------------------------------------------------------|---------------------------------------------------------------------------------------------------------------|----------|------|--|
| EXERCISE                         |                       |                                      |                                                                              |             |            |                                              |                           |      |      |                                                                                                                                                                            |                                                                                                                                                                      |                                                                              |                                                                              |                                                                            |                      |                                         |                                   |   |                           |   |                        |              |                                                                             |                                                                     |                                |                           |                                |                                                      |                                             |                                                                |                                                                                                      |                                                                                                                                                                                                                                                                                                                         |                                                                                                                                                 |                                                                                                               |                                                                                                               |          |      |  |
| Christie, 2007                   | SLR                   | SLRs 28                              | NR                                                                           | RA patients | NR         | NR                                           | NR                        | NR   | NR   | NR                                                                                                                                                                         | NA                                                                                                                                                                   | Joint protection                                                             |                                                                              | Alternative intervention/no intervention                                   |                      | Pain and function                       |                                   |   |                           |   |                        |              |                                                                             |                                                                     |                                |                           |                                |                                                      |                                             |                                                                | Improves function, no difference in pain, high-quality beneficial effect                             | High-quality evidence was found for beneficial effects of joint protection and patient education, moderate-quality evidence was found for beneficial effects of herbal therapy (gamma-linolenic acid) and low-level laser therapy, and low-quality evidence was found for the effectiveness of the other interventions. | Low                                                                                                                                             | Moderate-High                                                                                                 |                                                                                                               |          |      |  |
|                                  |                       |                                      |                                                                              |             |            |                                              |                           |      |      |                                                                                                                                                                            |                                                                                                                                                                      | Comprehensive occupation therapy                                             |                                                                              | No intervention                                                            |                      | Pain and function                       |                                   |   |                           |   |                        |              |                                                                             |                                                                     |                                |                           |                                |                                                      |                                             |                                                                | Improves function, no difference in pain, low quality evidence                                       |                                                                                                                                                                                                                                                                                                                         |                                                                                                                                                 |                                                                                                               |                                                                                                               |          |      |  |
|                                  |                       |                                      |                                                                              |             |            |                                              |                           |      |      |                                                                                                                                                                            |                                                                                                                                                                      | Exercise                                                                     |                                                                              | No intervention/alternative intervention/different types of exercises      |                      | Pain and function                       |                                   |   |                           |   |                        |              |                                                                             |                                                                     |                                |                           |                                |                                                      |                                             |                                                                | Reduces pain and improves function, no difference in patient global assessment, low quality evidence |                                                                                                                                                                                                                                                                                                                         |                                                                                                                                                 |                                                                                                               |                                                                                                               |          |      |  |
| Everdsen, 2007                   | RCT                   | 115                                  | RA patients                                                                  | 9Y          | NR         | 1.38-1.50, range of medians                  | 24-26.5, range of medians | NR   | 0.69 | NA                                                                                                                                                                         | Hydrotherapy (30min, 1/W)                                                                                                                                            | 57                                                                           | Similar exercises on land (30min, 1/W)                                       | 58                                                                         | HAQ                  | 6W                                      |                                   |   |                           |   |                        |              |                                                                             | 1.50 (1.06-1.84), median (IQR)                                      | 1.44 (0.78-1.84), median (IQR) |                           |                                |                                                      |                                             |                                                                |                                                                                                      |                                                                                                                                                                                                                                                                                                                         |                                                                                                                                                 |                                                                                                               |                                                                                                               | High     |      |  |
| Figen, 2011                      | RCT                   | 60                                   | RA patients with disease duration >1Y                                        | 8.5Y        | DAS28 5.2  | 2.8 (intervention 3.9; control 1.5; p<0.001) | NR                        | NR   | NR   | NA                                                                                                                                                                         | Inpatient rehabilitation model (15 sessions during 3W of hospitalisation)                                                                                            | 32                                                                           | Home exercise model (same exercises as intervention group, although at home) | 28                                                                         | HAQ                  | NR                                      |                                   |   |                           |   |                        |              |                                                                             | 1 (0.7)                                                             | 0.7 (0.6)                      |                           |                                |                                                      |                                             |                                                                | p<0.001, adjusted for baseline                                                                       | 0.46                                                                                                                                                                                                                                                                                                                    |                                                                                                                                                 |                                                                                                               |                                                                                                               | High     |      |  |
| Hurkmans, 2009                   | SLR                   | RCTs 8                               | 575                                                                          | RA patients | NR         | Low to moderate                              | NR                        | NR   | NR   | NR                                                                                                                                                                         | NA                                                                                                                                                                   | Short-term land-based aerobic capacity training and muscle strength training | 50 (1 study)                                                                 | NR                                                                         |                      | Functional ability (HAQ)                |                                   |   |                           |   |                        |              |                                                                             | 0.54 SDs lower                                                      | -0.16                          |                           |                                |                                                      |                                             |                                                                |                                                                                                      |                                                                                                                                                                                                                                                                                                                         | Based on the evidence, aerobic capacity training combined with muscle strength training is recommended as routine practice in patients with RA. | Low                                                                                                           | Moderate-High                                                                                                 |          |      |  |
|                                  |                       |                                      |                                                                              |             |            |                                              |                           |      |      |                                                                                                                                                                            |                                                                                                                                                                      | Short-term water-based aerobic capacity training                             |                                                                              | NR                                                                         |                      | Functional ability and aerobic capacity |                                   |   |                           |   |                        |              |                                                                             |                                                                     |                                |                           |                                |                                                      |                                             |                                                                | Limited evidence for a positive effect                                                               |                                                                                                                                                                                                                                                                                                                         |                                                                                                                                                 |                                                                                                               |                                                                                                               |          |      |  |
| Lee, 2007                        | SLR                   | RCTs 2; Non-RCTs 3                   | 382                                                                          | RA patients | NR         | NR                                           | NR                        | NR   | NR   | NR                                                                                                                                                                         | NA                                                                                                                                                                   | Tai chi                                                                      | (2 studies)                                                                  | Education plus stretching exercises/Usual activity                         |                      | Functional index                        |                                   |   |                           |   |                        |              |                                                                             |                                                                     |                                |                           |                                |                                                      |                                             |                                                                | Improvement in RCT; No improvement in non-RCT                                                        |                                                                                                                                                                                                                                                                                                                         |                                                                                                                                                 | Collectively this evidence is not convincing enough to suggest that tai chi is an effective treatment for RA. | Moderate                                                                                                      | High     |      |  |
| Macedo, 2009                     | RCT                   | 32                                   | RA patients with medium or high work disability risk on the RA WIS           | 10Y         | DAS28 4.55 | 1.38                                         | 52.69                     | NR   | 0.55 | NA                                                                                                                                                                         | Occupational therapy (6-8 sessions of 30-120min)                                                                                                                     | 16                                                                           | Usual care                                                                   | 16                                                                         | HAQ-DI               | Change from BL until 6M                 |                                   |   |                           |   |                        |              |                                                                             | -0.27 (0.49)                                                        | 0.17 (0.51)                    |                           |                                |                                                      |                                             |                                                                | p<0.02                                                                                               | 0.88                                                                                                                                                                                                                                                                                                                    |                                                                                                                                                 |                                                                                                               |                                                                                                               | High     |      |  |
| Santos, 2019                     | SLR (8 SLRs)          | 6740                                 | RA patients                                                                  | NR          | NR         | NR                                           | Nr                        | NR   | NR   | NR                                                                                                                                                                         | NR                                                                                                                                                                   | Multicomponent or single exercise/physical activity interventions            | 1384 (#2)                                                                    | Usual care/placebo/other non-pharmacological or non-surgical interventions | #8                   | Functional disability                   |                                   |   |                           |   |                        |              |                                                                             |                                                                     |                                |                           |                                |                                                      |                                             |                                                                |                                                                                                      | Effective improvement with small positive effects; Conclusions: Of the included interventions, only multicomponent or single exercise/physical activity interventions, psychosocial interventions and custom orthoses seem to reduce the impact of rheumatoid arthritis.                                                | Moderate                                                                                                                                        | Moderate                                                                                                      |                                                                                                               |          |      |  |
| Siqueira, 2017                   | RCT                   | 100                                  | Women with RA                                                                | 8.5Y        | NR         | 0.7                                          | NR                        | NR   | NR   | Right knee flexor muscle strength 43.7 Nm; Left knee flexor muscle strength 42.5Nm; Right knee extensor muscle strength 88.36Nm; Left knee extensor muscle strength 88.6Nm | Water-based aerobic exercise (3/W)                                                                                                                                   | 33                                                                           | Usual care                                                                   | 34                                                                         | HAQ                  | 16W                                     |                                   |   |                           |   |                        |              |                                                                             | 0.4 (0.4)                                                           | 1.3 (1.7)                      |                           |                                |                                                      |                                             |                                                                | p<0.002                                                                                              | 0.73                                                                                                                                                                                                                                                                                                                    |                                                                                                                                                 |                                                                                                               |                                                                                                               | High     |      |  |
|                                  |                       |                                      |                                                                              |             |            |                                              |                           |      |      |                                                                                                                                                                            | Land-based aerobic exercise (3/W)                                                                                                                                    | 33                                                                           | Usual care                                                                   | 34                                                                         | HAQ                  | 16W                                     |                                   |   |                           |   |                        | 0.8 (0.6)    | 1.3 (1.7)                                                                   |                                                                     |                                | p<0.002                   | 0.39                           |                                                      |                                             |                                                                |                                                                                                      |                                                                                                                                                                                                                                                                                                                         |                                                                                                                                                 |                                                                                                               |                                                                                                               |          |      |  |
| Pain (VAS-pain)                  |                       |                                      |                                                                              |             |            |                                              |                           |      |      |                                                                                                                                                                            |                                                                                                                                                                      |                                                                              |                                                                              |                                                                            |                      |                                         |                                   |   |                           |   |                        |              |                                                                             |                                                                     |                                |                           |                                |                                                      |                                             |                                                                |                                                                                                      |                                                                                                                                                                                                                                                                                                                         |                                                                                                                                                 |                                                                                                               |                                                                                                               |          |      |  |
| Christie, 2007                   | SLR                   | SLRs 28                              | NR                                                                           | RA patients | NR         | NR                                           | NR                        | NR   | NR   | NR                                                                                                                                                                         | NA                                                                                                                                                                   | Joint protection                                                             |                                                                              | Alternative intervention/no intervention                                   |                      | Pain and function                       |                                   |   |                           |   |                        |              |                                                                             |                                                                     |                                |                           |                                |                                                      |                                             |                                                                | Improves function, no difference in pain, high-quality beneficial effect                             | High-quality evidence was found for beneficial effects of joint protection and patient education, moderate-quality evidence was found for beneficial effects of herbal therapy (gamma-linolenic acid) and low-level laser therapy, and low-quality evidence was found for the effectiveness of the other interventions. | Low                                                                                                                                             | Moderate-High                                                                                                 |                                                                                                               |          |      |  |
|                                  |                       |                                      |                                                                              |             |            |                                              |                           |      |      |                                                                                                                                                                            | Comprehensive occupation therapy                                                                                                                                     |                                                                              | No intervention                                                              |                                                                            | Pain and function    |                                         |                                   |   |                           |   |                        |              |                                                                             |                                                                     |                                |                           |                                |                                                      |                                             | Improves function, no difference in pain, low quality evidence |                                                                                                      |                                                                                                                                                                                                                                                                                                                         |                                                                                                                                                 |                                                                                                               |                                                                                                               |          |      |  |
|                                  |                       |                                      |                                                                              |             |            |                                              |                           |      |      |                                                                                                                                                                            |                                                                                                                                                                      | Exercise                                                                     |                                                                              | No intervention/alternative intervention/different types of exercises      |                      | Pain and function                       |                                   |   |                           |   |                        |              |                                                                             |                                                                     |                                |                           |                                |                                                      |                                             |                                                                | Reduces pain and improves function, no difference in patient global assessment, low quality evidence |                                                                                                                                                                                                                                                                                                                         |                                                                                                                                                 |                                                                                                               |                                                                                                               |          |      |  |
| Everdsen, 2007                   | RCT                   | 115                                  | RA patients                                                                  | 9Y          | NR         | 1.38-1.50, range of medians                  | 24-26.5, range of medians | NR   | 0.69 | NA                                                                                                                                                                         | Hydrotherapy (30min, 1/week)                                                                                                                                         | 57                                                                           | Similar exercises on land (30min, 1/W)                                       | 58                                                                         | VAS-pain             | 6W                                      |                                   |   |                           |   |                        |              |                                                                             | 25.5 (11-41), median (IQR)                                          | 27.5 (15-58), median (IQR)     |                           |                                |                                                      |                                             |                                                                |                                                                                                      |                                                                                                                                                                                                                                                                                                                         |                                                                                                                                                 |                                                                                                               |                                                                                                               | High     |      |  |
| Felthuisen, 2016                 | RCT                   | 70                                   | RA patients with DAS28<3.8, VAS-fatigue >50 (0-100) and disease duration >3Y | 10Y         | DAS28 3.35 | 0.7                                          | 39.8                      | 68.2 | NR   | NA                                                                                                                                                                         | Person-centered physical therapy (a self-care plan was jointly developed and focused on tailoring health-enhancing physical activity, and balancing life activities) | 36                                                                           | Usual physical and social activities                                         | 34                                                                         | VAS-pain             | Change from BL until 12W                |                                   |   |                           |   |                        |              |                                                                             | -4.8 (18.4)                                                         | -1.1 (24.6)                    |                           |                                |                                                      |                                             |                                                                | p<0.46                                                                                               | 0.12                                                                                                                                                                                                                                                                                                                    |                                                                                                                                                 |                                                                                                               |                                                                                                               | High     |      |  |
| Hurkmans, 2009                   | SLR                   | RCTs 8                               | 575                                                                          | RA patients | NR         | low to moderate                              | NR                        | NR   | NR   | NR                                                                                                                                                                         | NA                                                                                                                                                                   | Short-term land-based aerobic capacity training                              | 50 (1 study)                                                                 | NR                                                                         |                      | Aerobic capacity                        |                                   |   |                           |   |                        |              |                                                                             |                                                                     |                                |                           |                                |                                                      |                                             |                                                                |                                                                                                      |                                                                                                                                                                                                                                                                                                                         | Based on the evidence, aerobic capacity training combined with muscle strength training is recommended as routine practice in patients with RA. | Low                                                                                                           | Moderate-High                                                                                                 |          |      |  |
|                                  |                       |                                      |                                                                              |             |            |                                              |                           |      |      |                                                                                                                                                                            |                                                                                                                                                                      | Short-term land-based aerobic capacity training and muscle strength training | 50 (1 study)                                                                 | NR                                                                         |                      | Self-reported pain (VAS 0-10)           |                                   |   |                           |   |                        |              |                                                                             | 0.53 SDs lower                                                      | 0.9                            |                           |                                |                                                      |                                             |                                                                |                                                                                                      |                                                                                                                                                                                                                                                                                                                         |                                                                                                                                                 |                                                                                                               |                                                                                                               |          |      |  |
| Lee, 2007                        | SLR                   | RCTs 2; Non-RCTs 3                   | 382                                                                          | RA patients | NR         | NR                                           | NR                        | NR   | NR   | NR                                                                                                                                                                         | NA                                                                                                                                                                   | Tai chi                                                                      | (3 studies)                                                                  | Education plus stretching exercises/Usual activity                         |                      | Pain                                    |                                   |   |                           |   |                        |              |                                                                             |                                                                     |                                |                           |                                |                                                      |                                             |                                                                |                                                                                                      | No significant pain reduction in 2 RCTs; significant pain reduction in non-RCT                                                                                                                                                                                                                                          |                                                                                                                                                 |                                                                                                               | Collectively this evidence is not convincing enough to suggest that tai chi is an effective treatment for RA. | Moderate | High |  |
| Macedo, 2009                     | RCT                   | 32                                   | RA patients with medium or high work disability risk on the RA WIS           | 10Y         | DAS28 4.55 | 1.38                                         | 52.69                     | NR   | 0.55 | NA                                                                                                                                                                         | Occupational therapy (6-8 sessions of 30-120min)                                                                                                                     | 16                                                                           | Usual care                                                                   | 16                                                                         | VAS-pain             | Change from BL until 6M                 |                                   |   |                           |   |                        |              |                                                                             | -25.31 (24.22)                                                      | -1.13 (22.98)                  |                           |                                |                                                      |                                             |                                                                |                                                                                                      |                                                                                                                                                                                                                                                                                                                         | p<0.007                                                                                                                                         | 1.02                                                                                                          |                                                                                                               |          | High |  |

|                       |                           |              |                                                                    |                                                                              |            |                                              |                             |                           |      |                                                                                                                                                                          |                                                                                                                                                       |                                                                                                                                                                      |                                                                              |                                                    |                          |                                    |                                   |                                                           |                                  |                                                                                                                                                                                                                                                                                                                                                                                                                                                                                                                                                                                      |                                                                                                                                                 |          |               |
|-----------------------|---------------------------|--------------|--------------------------------------------------------------------|------------------------------------------------------------------------------|------------|----------------------------------------------|-----------------------------|---------------------------|------|--------------------------------------------------------------------------------------------------------------------------------------------------------------------------|-------------------------------------------------------------------------------------------------------------------------------------------------------|----------------------------------------------------------------------------------------------------------------------------------------------------------------------|------------------------------------------------------------------------------|----------------------------------------------------|--------------------------|------------------------------------|-----------------------------------|-----------------------------------------------------------|----------------------------------|--------------------------------------------------------------------------------------------------------------------------------------------------------------------------------------------------------------------------------------------------------------------------------------------------------------------------------------------------------------------------------------------------------------------------------------------------------------------------------------------------------------------------------------------------------------------------------------|-------------------------------------------------------------------------------------------------------------------------------------------------|----------|---------------|
| Manning, 2014         | RCT                       | 210          | RA patients                                                        | 20M                                                                          | DAS28 5.1  | NR                                           | 45.2                        | 47.2                      | NR   | Group session with education, self-management and global upper extremity exercise training (4 times 2/W), then functional daily home exercise regimen                    | 52                                                                                                                                                    | Usual care                                                                                                                                                           | 56                                                                           | VAS-pain                                           | Change from BL until 12W | -13.0 (-23.0, -2.9), mean (95% CI) | 1.7 (-8.2, 11.6), mean (95% CI)   | -14.7 (-26.2, -3.2), mean (95% CI)                        | p= 0.013                         |                                                                                                                                                                                                                                                                                                                                                                                                                                                                                                                                                                                      |                                                                                                                                                 | High     |               |
| Macfarlane, 2012      | SLR: RCT's 11             | 672          | RA patients receiving complementary therapy                        | NR                                                                           | NR         | NR                                           | NR                          | NR                        | NR   | Tai chi                                                                                                                                                                  | 10 (1 study)                                                                                                                                          | Stretching and wellness education                                                                                                                                    | 10                                                                           | Pain                                               |                          |                                    |                                   |                                                           | ns                               | No good evidence of efficacy or effectiveness for the practitioner-based complementary therapies considered here. Effective improvement with small positive effects; Conclusions: Of the included interventions, only multicomponent or single exercise/physical activity interventions, psychosocial interventions and custom orthoses seem to reduce the impact of rheumatoid arthritis.                                                                                                                                                                                           | Moderate                                                                                                                                        | Moderate |               |
| Santos, 2019          | SLR (8 SLRs)              | 6740         | RA patients                                                        | NR                                                                           | NR         | NR                                           | Nr                          | NR                        | NR   | Multicomponent or single exercise/physical activity interventions                                                                                                        | 545 (#2)                                                                                                                                              | Usual care/placebo/other non-pharmacological or non-surgical interventions                                                                                           | #8                                                                           | Pain                                               | NR                       |                                    |                                   |                                                           |                                  | It is uncertain whether exercise improves hand function or pain in the short term. It probably slightly improves function but has little or no difference on pain in the medium and long term. It is uncertain whether exercise improves grip and pinch strength in the short term, and probably has little or no difference in the medium and long term. The ACRSD response is unknown. People who received exercise with adherence strategies were probably more adherent in the medium term than who did not receive exercise, but with little or no difference in the long term. | Moderate                                                                                                                                        | Moderate |               |
| Williams, 2018        | SLR: RCT's 7              | 841          | RA patients                                                        | NR                                                                           | NR         | NR                                           | NR                          | NR                        | NR   | Hand exercises                                                                                                                                                           | 124 (2 studies)<br>445 (1 study)<br>437 (1 study)                                                                                                     | No exercise<br>No exercise<br>No exercise                                                                                                                            |                                                                              | VAS-pain<br>Pain subscale MHQ<br>Pain subscale MHQ | <3M<br>3-11M<br>≥12M     | 95.58<br>54.2<br>55.1              | 67.6<br>51.4<br>51.4              |                                                           |                                  |                                                                                                                                                                                                                                                                                                                                                                                                                                                                                                                                                                                      | Low                                                                                                                                             | High     |               |
| Qot, (EQ, 50)         | Everdsen, 2007            | RCT          | 115                                                                | RA patients                                                                  | 9Y         | NR                                           | 1.38-1.50, range of medians | 24-26.5, range of medians | NR   | 0.69                                                                                                                                                                     | NA                                                                                                                                                    | Hydrotherapy (30min, 1/week)                                                                                                                                         | 57                                                                           | Similar exercises on land (30min, 1/W)             | 58                       | EQ-SD                              | 6W                                | 0.69 (0.59-0.78), median (IQR)                            | 0.68 (0.59-0.79), median (IQR)   |                                                                                                                                                                                                                                                                                                                                                                                                                                                                                                                                                                                      | ns                                                                                                                                              | High     |               |
| Lee, 2007             | SLR: RCT's 2; Non-RCT's 3 | 382          | RA patients                                                        | NR                                                                           | NR         | NR                                           | NR                          | NR                        | NR   | Tai chi                                                                                                                                                                  | (1 study)                                                                                                                                             | Education plus stretching exercises                                                                                                                                  |                                                                              | Quality of life                                    |                          |                                    |                                   | Improvement on vitality subscale of SF 36                 | p=0.02                           | 0.90                                                                                                                                                                                                                                                                                                                                                                                                                                                                                                                                                                                 | Collectively this evidence is not convincing enough to suggest that tai chi is an effective treatment for RA.                                   | Moderate | High          |
| Macedo, 2009          | RCT                       | 32           | RA patients with medium or high work disability risk on the RA WIS | 10Y                                                                          | DAS28 4.55 | 1.38                                         | 52.69                       | NR                        | 0.55 | NA                                                                                                                                                                       | Occupational therapy (6-8 sessions of 30-120min)                                                                                                      | 16                                                                                                                                                                   | Usual care                                                                   | 16                                                 | EQ-SD                    | Change from BL until 6M            | 0.13 (0.29)                       | -0.15 (0.33)                                              |                                  |                                                                                                                                                                                                                                                                                                                                                                                                                                                                                                                                                                                      | High                                                                                                                                            |          |               |
| Fatigue (VAS-fatigue) | Feldhusen, 2016           | RCT          | 70                                                                 | RA patients with DAS28<3.8, VAS-fatigue >50 (0-100) and disease duration >3Y | 10Y        | DAS28 3.35                                   | 0.7                         | 39.8                      | 68.2 | NR                                                                                                                                                                       | NA                                                                                                                                                    | Person-centered physical therapy (a self-care plan was jointly developed and focused on tailoring health-enhancing physical activity, and balancing life activities) | 36                                                                           | Usual physical and social activities               | 34                       | VAS-fatigue                        | Change from BL until 12W          | -23.5 (19.9)                                              | -15.3 (24.6)                     | p=0.042                                                                                                                                                                                                                                                                                                                                                                                                                                                                                                                                                                              | 0.37                                                                                                                                            | High     |               |
| Lee, 2007             | SLR: RCT's 2; Non-RCT's 3 | 382          | RA patients                                                        | NR                                                                           | NR         | NR                                           | NR                          | NR                        | NR   | Tai chi                                                                                                                                                                  | (2 studies)                                                                                                                                           | Usual activity                                                                                                                                                       | NR                                                                           | Fatigue                                            |                          |                                    |                                   | No improvement in RCT; Suggested effectiveness in non-RCT | p=0.136                          |                                                                                                                                                                                                                                                                                                                                                                                                                                                                                                                                                                                      | Collectively this evidence is not convincing enough to suggest that tai chi is an effective treatment for RA.                                   | Moderate | High          |
| Manning, 2014         | RCT                       | 210          | RA patients                                                        | 20M                                                                          | DAS28 5.1  | NR                                           | 45.2                        | 47.2                      | NR   | NA                                                                                                                                                                       | Group session with education, self-management and global upper extremity exercise training (4 times 2/W), then functional daily home exercise regimen | 52                                                                                                                                                                   | Usual care                                                                   | 56                                                 | VAS-fatigue              | Change from BL until 12W           | -7.9 (-18.3, -2.6), mean (95% CI) | 1.2 (-9.2, 11.5), mean (95% CI)                           | -8.0 (-21.0, 5.0), mean (95% CI) | p= 0.136                                                                                                                                                                                                                                                                                                                                                                                                                                                                                                                                                                             | High                                                                                                                                            |          |               |
| Santos, 2019          | SLR (8 SLRs)              | 6740         | RA patients                                                        | NR                                                                           | NR         | NR                                           | Nr                          | NR                        | NR   | Multicomponent or single exercise/physical activity interventions                                                                                                        | 628 (#2)                                                                                                                                              | Usual care/placebo/other non-pharmacological or non-surgical interventions                                                                                           | #8                                                                           | Fatigue                                            | NR                       |                                    |                                   |                                                           |                                  | Effective improvement with small positive effects; Conclusions: Of the included interventions, only multicomponent or single exercise/physical activity interventions, psychosocial interventions and custom orthoses seem to reduce the impact of rheumatoid arthritis.                                                                                                                                                                                                                                                                                                             | Moderate                                                                                                                                        | Moderate |               |
| Disease activity      | Feldhusen, 2016           | RCT          | 70                                                                 | RA patients with DAS28<3.8, VAS-fatigue >50 (0-100) and disease duration >3Y | 10Y        | DAS28 3.35                                   | 0.7                         | 39.8                      | 68.2 | NR                                                                                                                                                                       | NA                                                                                                                                                    | Person-centered physical therapy (a self-care plan was jointly developed and focused on tailoring health-enhancing physical activity, and balancing life activities) | 36                                                                           | Usual physical and social activities               | 34                       | DAS28                              | Change from BL until 12W          | -0.3 (0.9)                                                | -0.3 (1.0)                       | p=1.00                                                                                                                                                                                                                                                                                                                                                                                                                                                                                                                                                                               | 0                                                                                                                                               | High     |               |
| Figen, 2011           | RCT                       | 60           | RA patients with disease duration >1Y                              | 8.5Y                                                                         | DAS28 5.2  | 2.8 (intervention 3.9; control 1.5; p=0.001) | NR                          | NR                        | NR   | NA                                                                                                                                                                       | Inpatient rehabilitation model (15 sessions during 3W of hospitalisation)                                                                             | 32                                                                                                                                                                   | Home exercise model (same exercises as intervention group, although at home) | 28                                                 | DAS28                    | NR                                 |                                   | 4.1 (1.3)                                                 | 4.1 (1.2)                        | p=0.001, adjusted for baseline                                                                                                                                                                                                                                                                                                                                                                                                                                                                                                                                                       | 0                                                                                                                                               | High     |               |
| Macedo, 2009          | RCT                       | 32           | RA patients with medium or high work disability risk on the RA WIS | 10Y                                                                          | DAS28 4.55 | 1.38                                         | 52.69                       | NR                        | 0.55 | NA                                                                                                                                                                       | Occupational therapy (6-8 sessions of 30-120min)                                                                                                      | 16                                                                                                                                                                   | Usual care                                                                   | 16                                                 | DAS28                    | Change from BL until 6M            | -0.94 (1.32)                      | 0.11 (1.21)                                               | p=0.03                           | 0.83                                                                                                                                                                                                                                                                                                                                                                                                                                                                                                                                                                                 | High                                                                                                                                            |          |               |
| Manning, 2014         | RCT                       | 210          | RA patients                                                        | 20M                                                                          | DAS28 5.1  | NR                                           | 45.2                        | 47.2                      | NR   | NA                                                                                                                                                                       | Group session with education, self-management and global upper extremity exercise training (4 times 2/W), then functional daily home exercise regimen | 52                                                                                                                                                                   | Usual care                                                                   | 56                                                 | DAS28                    | Change from BL until 12W           | -0.8 (-1.4, -0.2), mean (95% CI)  | -0.1 (-0.7, 0.4), mean (95% CI)                           | 0.7 (-1.4, 0.0), mean (95% CI)   | p= 0.047                                                                                                                                                                                                                                                                                                                                                                                                                                                                                                                                                                             | High                                                                                                                                            |          |               |
| Siqueira, 2017        | RCT                       | 100          | Women with RA                                                      | 8.5Y                                                                         | NR         | 0.7                                          | NR                          | NR                        | NR   | Right knee flexor muscle strength 43.7 Nm; Left knee flexor muscle strengt 42.5Nm; Right knee extensor muscle strength 88.3Nm; Left knee extensor muscle strength 88.6Nm | Waterbased aerobic exercise (3/W)                                                                                                                     | 33                                                                                                                                                                   | Usual care                                                                   | 34                                                 | DAS28                    | 16W                                | 3.1 (1)                           | 4.2 (0.9)                                                 | p=0.0001                         | 1.16                                                                                                                                                                                                                                                                                                                                                                                                                                                                                                                                                                                 | High                                                                                                                                            |          |               |
|                       |                           |              |                                                                    |                                                                              |            |                                              |                             |                           |      | Land-based aerobic exercise (1/W)                                                                                                                                        | 33                                                                                                                                                    | Usual care                                                                                                                                                           | 34                                                                           | DAS28                                              | 16W                      | 3.6 (1.2)                          | 4.2 (0.9)                         | p=0.0001                                                  | 0.57                             |                                                                                                                                                                                                                                                                                                                                                                                                                                                                                                                                                                                      |                                                                                                                                                 |          |               |
| Other                 | Hurkmans, 2009            | SLR: RCT's 8 | 575                                                                | RA patients                                                                  | NR         | Low to moderate                              | NR                          | NR                        | NR   | NA                                                                                                                                                                       | Short-term land-based aerobic capacity training                                                                                                       | NR                                                                                                                                                                   |                                                                              | Aerobic capacity                                   |                          |                                    |                                   | Pooled effect size 0.99 (95%CI 0.29-1.68)                 |                                  |                                                                                                                                                                                                                                                                                                                                                                                                                                                                                                                                                                                      | Based on the evidence, aerobic capacity training combined with muscle strength training is recommended as routine practice in patients with RA. | Low      | Moderate-High |
|                       |                           |              |                                                                    |                                                                              |            |                                              |                             |                           |      | Short-term land-based aerobic capacity training and muscle strength training                                                                                             | NR                                                                                                                                                    |                                                                                                                                                                      |                                                                              | Aerobic capacity and muscle strength               |                          |                                    |                                   | Pooled effect size 0.47 (95%CI 0.0-0.93)                  |                                  |                                                                                                                                                                                                                                                                                                                                                                                                                                                                                                                                                                                      |                                                                                                                                                 |          |               |
|                       |                           |              |                                                                    |                                                                              |            |                                              |                             |                           |      | Short-term water-based aerobic capacity training                                                                                                                         | 74 (2 studies)                                                                                                                                        | NR                                                                                                                                                                   |                                                                              |                                                    | Muscle strength          |                                    |                                   | 0.47 SDs higher                                           |                                  | Limited evidence for a positive effect                                                                                                                                                                                                                                                                                                                                                                                                                                                                                                                                               |                                                                                                                                                 |          |               |

|                                     |                         |              |                                                          |             |            |                                    |               |             |             |                                                                                                                                                                           |                                                                                                                                                                                                                                                                      |                                                                                                                                            |                                                                                               |                                                                         |                                                                    |                                     |                                     |                                                                                                                                                                                                                                                                            |                                    |                                         |                                        |                                  |     |                |              |             |      |                                     |     |             |             |                                                                                                                                                                                                                                                                                                                                                                                                                                                                                                                                                                                      |      |                                    |               |             |             |       |      |                                   |               |             |             |       |      |                                  |                 |                    |              |                                    |             |                                     |                     |             |             |       |      |                                    |                                                                                                 |             |                       |                              |                                                                                                  |                                        |                                                                                                                                                                                                                   |            |              |                                   |     |             |             |       |      |                                  |     |             |             |
|-------------------------------------|-------------------------|--------------|----------------------------------------------------------|-------------|------------|------------------------------------|---------------|-------------|-------------|---------------------------------------------------------------------------------------------------------------------------------------------------------------------------|----------------------------------------------------------------------------------------------------------------------------------------------------------------------------------------------------------------------------------------------------------------------|--------------------------------------------------------------------------------------------------------------------------------------------|-----------------------------------------------------------------------------------------------|-------------------------------------------------------------------------|--------------------------------------------------------------------|-------------------------------------|-------------------------------------|----------------------------------------------------------------------------------------------------------------------------------------------------------------------------------------------------------------------------------------------------------------------------|------------------------------------|-----------------------------------------|----------------------------------------|----------------------------------|-----|----------------|--------------|-------------|------|-------------------------------------|-----|-------------|-------------|--------------------------------------------------------------------------------------------------------------------------------------------------------------------------------------------------------------------------------------------------------------------------------------------------------------------------------------------------------------------------------------------------------------------------------------------------------------------------------------------------------------------------------------------------------------------------------------|------|------------------------------------|---------------|-------------|-------------|-------|------|-----------------------------------|---------------|-------------|-------------|-------|------|----------------------------------|-----------------|--------------------|--------------|------------------------------------|-------------|-------------------------------------|---------------------|-------------|-------------|-------|------|------------------------------------|-------------------------------------------------------------------------------------------------|-------------|-----------------------|------------------------------|--------------------------------------------------------------------------------------------------|----------------------------------------|-------------------------------------------------------------------------------------------------------------------------------------------------------------------------------------------------------------------|------------|--------------|-----------------------------------|-----|-------------|-------------|-------|------|----------------------------------|-----|-------------|-------------|
|                                     |                         |              |                                                          |             |            |                                    |               |             |             |                                                                                                                                                                           |                                                                                                                                                                                                                                                                      |                                                                                                                                            |                                                                                               |                                                                         | Long-term land-based aerobic capacity and muscle strength training | NR                                  |                                     | Aerobic capacity and muscle strength                                                                                                                                                                                                                                       |                                    | Moderate evidence for a positive effect |                                        |                                  |     |                |              |             |      |                                     |     |             |             |                                                                                                                                                                                                                                                                                                                                                                                                                                                                                                                                                                                      |      |                                    |               |             |             |       |      |                                   |               |             |             |       |      |                                  |                 |                    |              |                                    |             |                                     |                     |             |             |       |      |                                    |                                                                                                 |             |                       |                              |                                                                                                  |                                        |                                                                                                                                                                                                                   |            |              |                                   |     |             |             |       |      |                                  |     |             |             |
| Lau, 2019                           | RCT                     | 21           | RA patients                                              |             | NR         | NR                                 | NR            | NR          | NR          | NR                                                                                                                                                                        | Weighted RAID 2.99                                                                                                                                                                                                                                                   | Neural mobilisation exercises (targeting the median, musculocutaneous, femoral and saphenous nerve, as well as entire nervous system, 2/3) | 11                                                                                            | Control (gentle joint mobilisation exercises targeting the same joints) | 10                                                                 | Weighted RAID                       | Change from BL until post-treatment | -0.79                                                                                                                                                                                                                                                                      | -0.15                              | p=0.65                                  | High                                   |                                  |     |                |              |             |      |                                     |     |             |             |                                                                                                                                                                                                                                                                                                                                                                                                                                                                                                                                                                                      |      |                                    |               |             |             |       |      |                                   |               |             |             |       |      |                                  |                 |                    |              |                                    |             |                                     |                     |             |             |       |      |                                    |                                                                                                 |             |                       |                              |                                                                                                  |                                        |                                                                                                                                                                                                                   |            |              |                                   |     |             |             |       |      |                                  |     |             |             |
| Lee, 2007                           | SLR: RCTs 2; Non-RCTs 3 | 382          | RA patients                                              |             | NR         | NR                                 | NR            | NR          | NR          | NR                                                                                                                                                                        | NA                                                                                                                                                                                                                                                                   | Tai chi                                                                                                                                    | (2 studies)                                                                                   | Usual activity                                                          |                                                                    | Range of motion and joint functions | No improvement                      | Collectively this evidence is not convincing enough to suggest that tai chi is an effective treatment for RA.                                                                                                                                                              |                                    |                                         | Moderate                               | High                             |     |                |              |             |      |                                     |     |             |             |                                                                                                                                                                                                                                                                                                                                                                                                                                                                                                                                                                                      |      |                                    |               |             |             |       |      |                                   |               |             |             |       |      |                                  |                 |                    |              |                                    |             |                                     |                     |             |             |       |      |                                    |                                                                                                 |             |                       |                              |                                                                                                  |                                        |                                                                                                                                                                                                                   |            |              |                                   |     |             |             |       |      |                                  |     |             |             |
| Santos, 2019                        | SLR (8 SLRs)            | 6740         | RA patients                                              |             | NR         | NR                                 | NR            | Nr          | NR          | NR                                                                                                                                                                        | NR                                                                                                                                                                                                                                                                   | Multi-component or single exercise/physical activity interventions                                                                         | (2 studies) 586 (#1)                                                                          | Education plus stretching exercises/Usual activity                      | #8                                                                 | Depression and mood                 | Improvement of depression and mood  | Effective improvement with small positive effects; Conclusions: Of the included interventions, only multi-component or single exercised/physical activity interventions, psychosocial interventions and custom orthoses seem to reduce the impact of rheumatoid arthritis. |                                    |                                         | Moderate                               | Moderate                         |     |                |              |             |      |                                     |     |             |             |                                                                                                                                                                                                                                                                                                                                                                                                                                                                                                                                                                                      |      |                                    |               |             |             |       |      |                                   |               |             |             |       |      |                                  |                 |                    |              |                                    |             |                                     |                     |             |             |       |      |                                    |                                                                                                 |             |                       |                              |                                                                                                  |                                        |                                                                                                                                                                                                                   |            |              |                                   |     |             |             |       |      |                                  |     |             |             |
| Siqueira, 2017                      | RCT                     | 100          | Women with RA                                            | 8.5Y        | NR         | 0.7                                | NR            | NR          | NR          | Right knee flexor muscle strength 43.7 Nm; Left knee flexor muscle strength 42.5Nm; Right knee extensor muscle strength 88.3Nm; Left knee extensor muscle strength 88.6Nm | Waterbased aerobic exercise (3/W)                                                                                                                                                                                                                                    | 33                                                                                                                                         | Usual care                                                                                    | 34                                                                      | Right knee flexor muscle strength                                  | 16W                                 | 48.8 (11.3)                         | 42.2 (13.1)                                                                                                                                                                                                                                                                | p=0.1                              | 0.54                                    | High                                   |                                  |     |                |              |             |      |                                     |     |             |             |                                                                                                                                                                                                                                                                                                                                                                                                                                                                                                                                                                                      |      |                                    |               |             |             |       |      |                                   |               |             |             |       |      |                                  |                 |                    |              |                                    |             |                                     |                     |             |             |       |      |                                    |                                                                                                 |             |                       |                              |                                                                                                  |                                        |                                                                                                                                                                                                                   |            |              |                                   |     |             |             |       |      |                                  |     |             |             |
|                                     |                         |              |                                                          |             |            |                                    |               |             |             |                                                                                                                                                                           |                                                                                                                                                                                                                                                                      |                                                                                                                                            |                                                                                               |                                                                         |                                                                    |                                     |                                     |                                                                                                                                                                                                                                                                            |                                    |                                         |                                        | Left knee flexor muscle strength | 16W | 44.8 (9.5)     | 43.1 (13.4)  | p=0.64      | 0.15 |                                     |     |             |             |                                                                                                                                                                                                                                                                                                                                                                                                                                                                                                                                                                                      |      |                                    |               |             |             |       |      |                                   |               |             |             |       |      |                                  |                 |                    |              |                                    |             |                                     |                     |             |             |       |      |                                    |                                                                                                 |             |                       |                              |                                                                                                  |                                        |                                                                                                                                                                                                                   |            |              |                                   |     |             |             |       |      |                                  |     |             |             |
|                                     |                         |              |                                                          |             |            |                                    |               |             |             |                                                                                                                                                                           |                                                                                                                                                                                                                                                                      |                                                                                                                                            |                                                                                               |                                                                         |                                                                    |                                     |                                     |                                                                                                                                                                                                                                                                            |                                    |                                         |                                        |                                  |     |                |              |             |      | Right knee extensor muscle strength | 16W | 95.5 (18.2) | 86.0 (29.5) | p=0.2                                                                                                                                                                                                                                                                                                                                                                                                                                                                                                                                                                                | 0.39 |                                    |               |             |             |       |      |                                   |               |             |             |       |      |                                  |                 |                    |              |                                    |             |                                     |                     |             |             |       |      |                                    |                                                                                                 |             |                       |                              |                                                                                                  |                                        |                                                                                                                                                                                                                   |            |              |                                   |     |             |             |       |      |                                  |     |             |             |
|                                     |                         |              |                                                          |             |            |                                    |               |             |             |                                                                                                                                                                           |                                                                                                                                                                                                                                                                      |                                                                                                                                            |                                                                                               |                                                                         |                                                                    |                                     |                                     |                                                                                                                                                                                                                                                                            |                                    |                                         |                                        |                                  |     |                |              |             |      |                                     |     |             |             |                                                                                                                                                                                                                                                                                                                                                                                                                                                                                                                                                                                      |      | Left knee extensor muscle strength | 16W           | 88.5 (16.1) | 84.7 (24.1) | p=0.8 | 0.18 |                                   |               |             |             |       |      |                                  |                 |                    |              |                                    |             |                                     |                     |             |             |       |      |                                    |                                                                                                 |             |                       |                              |                                                                                                  |                                        |                                                                                                                                                                                                                   |            |              |                                   |     |             |             |       |      |                                  |     |             |             |
|                                     |                         |              |                                                          |             |            |                                    |               |             |             |                                                                                                                                                                           |                                                                                                                                                                                                                                                                      |                                                                                                                                            |                                                                                               |                                                                         |                                                                    |                                     |                                     |                                                                                                                                                                                                                                                                            |                                    |                                         |                                        |                                  |     |                |              |             |      |                                     |     |             |             |                                                                                                                                                                                                                                                                                                                                                                                                                                                                                                                                                                                      |      |                                    |               |             |             |       |      | Right knee flexor muscle strength | 16W           | 43.6 (10.3) | 42.2 (13.1) | p=0.1 | 0.12 |                                  |                 |                    |              |                                    |             |                                     |                     |             |             |       |      |                                    |                                                                                                 |             |                       |                              |                                                                                                  |                                        |                                                                                                                                                                                                                   |            |              |                                   |     |             |             |       |      |                                  |     |             |             |
|                                     |                         |              |                                                          |             |            |                                    |               |             |             |                                                                                                                                                                           |                                                                                                                                                                                                                                                                      |                                                                                                                                            |                                                                                               |                                                                         |                                                                    |                                     |                                     |                                                                                                                                                                                                                                                                            |                                    |                                         |                                        |                                  |     |                |              |             |      |                                     |     |             |             |                                                                                                                                                                                                                                                                                                                                                                                                                                                                                                                                                                                      |      |                                    |               |             |             |       |      |                                   |               |             |             |       |      | Left knee flexor muscle strength | 16W             | 41.9 (14.9)        | 43.1 (13.4)  | p=0.64                             | 0.01        |                                     |                     |             |             |       |      |                                    |                                                                                                 |             |                       |                              |                                                                                                  |                                        |                                                                                                                                                                                                                   |            |              |                                   |     |             |             |       |      |                                  |     |             |             |
|                                     |                         |              |                                                          |             |            |                                    |               |             |             |                                                                                                                                                                           |                                                                                                                                                                                                                                                                      |                                                                                                                                            |                                                                                               |                                                                         |                                                                    |                                     |                                     |                                                                                                                                                                                                                                                                            |                                    |                                         |                                        |                                  |     |                |              |             |      |                                     |     |             |             |                                                                                                                                                                                                                                                                                                                                                                                                                                                                                                                                                                                      |      |                                    |               |             |             |       |      |                                   |               |             |             |       |      |                                  |                 |                    |              |                                    |             | Right knee extensor muscle strength | 16W                 | 86.3 (22.4) | 86.0 (29.5) | p=0.2 | 0.01 |                                    |                                                                                                 |             |                       |                              |                                                                                                  |                                        |                                                                                                                                                                                                                   |            |              |                                   |     |             |             |       |      |                                  |     |             |             |
|                                     |                         |              |                                                          |             |            |                                    |               |             |             |                                                                                                                                                                           |                                                                                                                                                                                                                                                                      |                                                                                                                                            |                                                                                               |                                                                         |                                                                    |                                     |                                     |                                                                                                                                                                                                                                                                            |                                    |                                         |                                        |                                  |     |                |              |             |      |                                     |     |             |             |                                                                                                                                                                                                                                                                                                                                                                                                                                                                                                                                                                                      |      |                                    |               |             |             |       |      |                                   |               |             |             |       |      |                                  |                 |                    |              |                                    |             |                                     |                     |             |             |       |      | Left knee extensor muscle strength | 16W                                                                                             | 85.3 (26.1) | 84.7 (24.1)           | p=0.8                        | 0.02                                                                                             |                                        |                                                                                                                                                                                                                   |            |              |                                   |     |             |             |       |      |                                  |     |             |             |
|                                     |                         |              |                                                          |             |            |                                    |               |             |             |                                                                                                                                                                           |                                                                                                                                                                                                                                                                      |                                                                                                                                            |                                                                                               |                                                                         |                                                                    |                                     |                                     |                                                                                                                                                                                                                                                                            |                                    |                                         |                                        |                                  |     |                |              |             |      |                                     |     |             |             |                                                                                                                                                                                                                                                                                                                                                                                                                                                                                                                                                                                      |      |                                    |               |             |             |       |      |                                   |               |             |             |       |      |                                  |                 |                    |              |                                    |             |                                     |                     |             |             |       |      |                                    |                                                                                                 |             |                       |                              |                                                                                                  | Land-based aerobic exercise (3/W)      | 33                                                                                                                                                                                                                | Usual care | 34           | Right knee flexor muscle strength | 16W | 43.6 (10.3) | 42.2 (13.1) | p=0.1 | 0.12 |                                  |     |             |             |
|                                     |                         |              |                                                          |             |            |                                    |               |             |             |                                                                                                                                                                           |                                                                                                                                                                                                                                                                      |                                                                                                                                            |                                                                                               |                                                                         |                                                                    |                                     |                                     |                                                                                                                                                                                                                                                                            |                                    |                                         |                                        |                                  |     |                |              |             |      |                                     |     |             |             |                                                                                                                                                                                                                                                                                                                                                                                                                                                                                                                                                                                      |      |                                    |               |             |             |       |      |                                   |               |             |             |       |      |                                  |                 |                    |              |                                    |             |                                     |                     |             |             |       |      |                                    |                                                                                                 |             |                       |                              |                                                                                                  |                                        |                                                                                                                                                                                                                   |            |              |                                   |     |             |             |       |      | Left knee flexor muscle strength | 16W | 41.9 (14.9) | 43.1 (13.4) |
| Right knee extensor muscle strength | 16W                     | 86.3 (22.4)  | 86.0 (29.5)                                              | p=0.2       | 0.01       |                                    |               |             |             |                                                                                                                                                                           |                                                                                                                                                                                                                                                                      |                                                                                                                                            |                                                                                               |                                                                         |                                                                    |                                     |                                     |                                                                                                                                                                                                                                                                            |                                    |                                         |                                        |                                  |     |                |              |             |      |                                     |     |             |             |                                                                                                                                                                                                                                                                                                                                                                                                                                                                                                                                                                                      |      |                                    |               |             |             |       |      |                                   |               |             |             |       |      |                                  |                 |                    |              |                                    |             |                                     |                     |             |             |       |      |                                    |                                                                                                 |             |                       |                              |                                                                                                  |                                        |                                                                                                                                                                                                                   |            |              |                                   |     |             |             |       |      |                                  |     |             |             |
|                                     |                         |              |                                                          |             |            | Left knee extensor muscle strength | 16W           | 85.3 (26.1) | 84.7 (24.1) | p=0.8                                                                                                                                                                     | 0.02                                                                                                                                                                                                                                                                 |                                                                                                                                            |                                                                                               |                                                                         |                                                                    |                                     |                                     |                                                                                                                                                                                                                                                                            |                                    |                                         |                                        |                                  |     |                |              |             |      |                                     |     |             |             |                                                                                                                                                                                                                                                                                                                                                                                                                                                                                                                                                                                      |      |                                    |               |             |             |       |      |                                   |               |             |             |       |      |                                  |                 |                    |              |                                    |             |                                     |                     |             |             |       |      |                                    |                                                                                                 |             |                       |                              |                                                                                                  |                                        |                                                                                                                                                                                                                   |            |              |                                   |     |             |             |       |      |                                  |     |             |             |
|                                     |                         |              |                                                          |             |            |                                    |               |             |             |                                                                                                                                                                           |                                                                                                                                                                                                                                                                      | Williams, 2018                                                                                                                             | SLR: RCTs 7                                                                                   | 841                                                                     | RA patients                                                        | NR                                  | NR                                  | NR                                                                                                                                                                                                                                                                         | NR                                 | NR                                      | NR                                     | NR                               | NA  | Hand exercises | 11 (1 study) | No exercise | 13   | Grip function test scale (0-80)     | <3M | 76.1        | 75          | It is uncertain whether exercise improves hand function or pain in the short term. It probably slightly improves function but has little or no difference on pain in the medium and long term. It is uncertain whether exercise improves grip and pinch strength in the short term, and probably has little or no difference in the medium and long term. The ACRSG response is unknown. People who received exercise with adherence strategies were probably more adherent in the medium term than who did not receive exercise, but with little or no difference in the long term. | Low  | High                               |               |             |             |       |      |                                   |               |             |             |       |      |                                  |                 |                    |              |                                    |             |                                     |                     |             |             |       |      |                                    |                                                                                                 |             |                       |                              |                                                                                                  |                                        |                                                                                                                                                                                                                   |            |              |                                   |     |             |             |       |      |                                  |     |             |             |
|                                     |                         |              |                                                          |             |            |                                    |               |             |             |                                                                                                                                                                           |                                                                                                                                                                                                                                                                      |                                                                                                                                            |                                                                                               |                                                                         |                                                                    |                                     |                                     |                                                                                                                                                                                                                                                                            |                                    |                                         |                                        |                                  |     |                |              |             |      |                                     |     |             |             |                                                                                                                                                                                                                                                                                                                                                                                                                                                                                                                                                                                      |      |                                    | 449 (1 study) | No exercise | MHQ         | 3-11M | 56.6 | 52.1                              |               |             |             |       |      |                                  |                 |                    |              |                                    |             |                                     |                     |             |             |       |      |                                    |                                                                                                 |             |                       |                              |                                                                                                  |                                        |                                                                                                                                                                                                                   |            |              |                                   |     |             |             |       |      |                                  |     |             |             |
|                                     |                         |              |                                                          |             |            |                                    |               |             |             |                                                                                                                                                                           |                                                                                                                                                                                                                                                                      |                                                                                                                                            |                                                                                               |                                                                         |                                                                    |                                     |                                     |                                                                                                                                                                                                                                                                            |                                    |                                         |                                        |                                  |     |                |              |             |      |                                     |     |             |             |                                                                                                                                                                                                                                                                                                                                                                                                                                                                                                                                                                                      |      |                                    |               |             |             |       |      |                                   | 428 (1 study) | No exercise | MHQ         | ≥12M  | 56.4 | 52.1                             |                 |                    |              |                                    |             |                                     |                     |             |             |       |      |                                    |                                                                                                 |             |                       |                              |                                                                                                  |                                        |                                                                                                                                                                                                                   |            |              |                                   |     |             |             |       |      |                                  |     |             |             |
|                                     |                         |              |                                                          |             |            |                                    |               |             |             |                                                                                                                                                                           |                                                                                                                                                                                                                                                                      |                                                                                                                                            |                                                                                               |                                                                         |                                                                    |                                     |                                     |                                                                                                                                                                                                                                                                            |                                    |                                         |                                        |                                  |     |                |              |             |      |                                     |     |             |             |                                                                                                                                                                                                                                                                                                                                                                                                                                                                                                                                                                                      |      |                                    |               |             |             |       |      |                                   |               |             |             |       |      |                                  | DIET            |                    |              |                                    |             |                                     |                     |             |             |       |      |                                    |                                                                                                 |             |                       |                              |                                                                                                  |                                        |                                                                                                                                                                                                                   |            |              |                                   |     |             |             |       |      |                                  |     |             |             |
|                                     |                         |              |                                                          |             |            |                                    |               |             |             |                                                                                                                                                                           |                                                                                                                                                                                                                                                                      |                                                                                                                                            |                                                                                               |                                                                         |                                                                    |                                     |                                     |                                                                                                                                                                                                                                                                            |                                    |                                         |                                        |                                  |     |                |              |             |      |                                     |     |             |             |                                                                                                                                                                                                                                                                                                                                                                                                                                                                                                                                                                                      |      |                                    |               |             |             |       |      |                                   |               |             |             |       |      |                                  | Pain (VAS pain) | Cameron, 2011      | SLR: RCTs 22 | 1278                               | RA patients | NR                                  | DAS28 40-62 (range) | NR          | NR          | NR    | NR   | NA                                 | Gamma-linolenic acid (GLA) from evening primrose oil, borage seed oil, or blackcurrant seed oil | 11 studies  | Placebo               | Pain intensity (score 0-100) | -32.83 (-56.25 - -9.42)                                                                          |                                        |                                                                                                                                                                                                                   |            |              |                                   |     |             |             |       |      |                                  |     |             |             |
|                                     |                         |              |                                                          |             |            |                                    |               |             |             |                                                                                                                                                                           |                                                                                                                                                                                                                                                                      |                                                                                                                                            |                                                                                               |                                                                         |                                                                    |                                     |                                     |                                                                                                                                                                                                                                                                            |                                    |                                         |                                        |                                  |     |                |              |             |      |                                     |     |             |             |                                                                                                                                                                                                                                                                                                                                                                                                                                                                                                                                                                                      |      |                                    |               |             |             |       |      |                                   |               |             |             |       |      |                                  |                 |                    |              |                                    |             |                                     |                     |             |             |       |      |                                    |                                                                                                 |             |                       |                              |                                                                                                  | Christie, 2007                         | SLR: SLRs 28                                                                                                                                                                                                      | NR         | RA patients  | NR                                | NR  | NR          | NR          | NR    | NA   |                                  |     |             |             |
|                                     |                         |              |                                                          |             |            |                                    |               |             |             |                                                                                                                                                                           |                                                                                                                                                                                                                                                                      |                                                                                                                                            |                                                                                               |                                                                         |                                                                    |                                     |                                     |                                                                                                                                                                                                                                                                            |                                    |                                         |                                        |                                  |     |                |              |             |      |                                     |     |             |             |                                                                                                                                                                                                                                                                                                                                                                                                                                                                                                                                                                                      |      |                                    |               |             |             |       |      |                                   |               |             |             |       |      |                                  | Diets           | Control/usual diet | Pain         | Reduces pain, low quality evidence |             |                                     |                     |             |             |       |      |                                    |                                                                                                 |             |                       |                              |                                                                                                  |                                        |                                                                                                                                                                                                                   |            |              |                                   |     |             |             |       |      |                                  |     |             |             |
| Disease activity                    | Cameron, 2011           | SLR: RCTs 22 | 1278                                                     | RA patients | NR         |                                    |               |             |             |                                                                                                                                                                           |                                                                                                                                                                                                                                                                      |                                                                                                                                            |                                                                                               |                                                                         |                                                                    |                                     |                                     |                                                                                                                                                                                                                                                                            |                                    |                                         |                                        |                                  |     |                |              |             |      |                                     |     |             |             |                                                                                                                                                                                                                                                                                                                                                                                                                                                                                                                                                                                      |      |                                    |               |             |             |       |      |                                   |               |             |             |       |      |                                  |                 |                    |              |                                    |             |                                     | DAS28 40-62 (range) | NR          | NR          | NR    | NR   | NA                                 | Tripterygium wilfordii (thunder god vine)                                                       | 4 studies   | Placebo/sulfasalazine | Disease activity             | Improvement in some outcomes regarding disease activity; side effects in one study with oral use | Poor reporting limited data extraction | Moderate evidence that oils containing gamma-linolenic acid and tripterygium wilfordii products may offer some benefit in relieving symptoms. Oral use of the latter may be associated with several side effects. | Low        | Low-Moderate |                                   |     |             |             |       |      |                                  |     |             |             |
|                                     |                         |              |                                                          |             |            | Phytodolor                         | 2 studies     | Placebo     | Efficacy    |                                                                                                                                                                           |                                                                                                                                                                                                                                                                      |                                                                                                                                            |                                                                                               |                                                                         |                                                                    |                                     |                                     |                                                                                                                                                                                                                                                                            |                                    |                                         |                                        |                                  |     |                |              |             |      |                                     |     |             |             |                                                                                                                                                                                                                                                                                                                                                                                                                                                                                                                                                                                      |      |                                    |               |             |             |       |      |                                   |               |             |             |       |      |                                  |                 |                    |              |                                    |             |                                     |                     |             |             |       |      |                                    |                                                                                                 |             |                       |                              |                                                                                                  |                                        |                                                                                                                                                                                                                   |            |              |                                   |     |             |             |       |      |                                  |     |             |             |
| PSYCHOLOGICAL                       |                         |              |                                                          |             |            |                                    |               |             |             |                                                                                                                                                                           |                                                                                                                                                                                                                                                                      |                                                                                                                                            |                                                                                               |                                                                         |                                                                    |                                     |                                     |                                                                                                                                                                                                                                                                            |                                    |                                         |                                        |                                  |     |                |              |             |      |                                     |     |             |             |                                                                                                                                                                                                                                                                                                                                                                                                                                                                                                                                                                                      |      |                                    |               |             |             |       |      |                                   |               |             |             |       |      |                                  |                 |                    |              |                                    |             |                                     |                     |             |             |       |      |                                    |                                                                                                 |             |                       |                              |                                                                                                  |                                        |                                                                                                                                                                                                                   |            |              |                                   |     |             |             |       |      |                                  |     |             |             |
| Function (HAQ)                      |                         |              |                                                          |             |            |                                    |               |             |             |                                                                                                                                                                           |                                                                                                                                                                                                                                                                      |                                                                                                                                            |                                                                                               |                                                                         |                                                                    |                                     |                                     |                                                                                                                                                                                                                                                                            |                                    |                                         |                                        |                                  |     |                |              |             |      |                                     |     |             |             |                                                                                                                                                                                                                                                                                                                                                                                                                                                                                                                                                                                      |      |                                    |               |             |             |       |      |                                   |               |             |             |       |      |                                  |                 |                    |              |                                    |             |                                     |                     |             |             |       |      |                                    |                                                                                                 |             |                       |                              |                                                                                                  |                                        |                                                                                                                                                                                                                   |            |              |                                   |     |             |             |       |      |                                  |     |             |             |
| Hewlett, 2019                       | RCT                     | 333          | RA patients with fatigue severity of ≥6 (0-10, BRAF-NRS) | 10Y, median | DAS28 4.22 | mHAQ 0.75                          | VAS-pain 5.64 |             |             | Fatigue impact (BRAF-NRS, score 0-10): 7.16                                                                                                                               | RAFT – Cognitive behaviour fatigue self-management programme delivered to groups of 5-7 RA patients in six 2-hour sessions (weeks 1-6) and a 1-hour consolidation session (week 14) by a pair of local rheumatology nurse specialists and/or occupational therapists | 156                                                                                                                                        | Usual care: brief discussion of a RA fatigue self-management booklet with the research nurse. | 152                                                                     | mHAQ                                                               | 26W                                 | 0.70 (0.54)                         | 0.71 (0.51)                                                                                                                                                                                                                                                                | Adjusted: 0.02 (0.06-0.10, p=0.67) | 0.02                                    | Adjusted for baseline level and centre | High                             |     |                |              |             |      |                                     |     |             |             |                                                                                                                                                                                                                                                                                                                                                                                                                                                                                                                                                                                      |      |                                    |               |             |             |       |      |                                   |               |             |             |       |      |                                  |                 |                    |              |                                    |             |                                     |                     |             |             |       |      |                                    |                                                                                                 |             |                       |                              |                                                                                                  |                                        |                                                                                                                                                                                                                   |            |              |                                   |     |             |             |       |      |                                  |     |             |             |

|                              |                                      |       |                                                                                                                                   |             |            |           |               |    |    |                                                                                                                     |                                                                                                                                                                                                                                                                      |                     |                                                                                                                                                                                      |     |                                 |                           |                                                                                                                                                                                                                                                                                                                                                                                                                                                                                                                                                                                                                                                                                                                                                                                                                                                                                                                                                                                                                                                                                                                                                                                                                                                                                                                                                                                                                                                               |               |                                      |      |                                        |      |  |
|------------------------------|--------------------------------------|-------|-----------------------------------------------------------------------------------------------------------------------------------|-------------|------------|-----------|---------------|----|----|---------------------------------------------------------------------------------------------------------------------|----------------------------------------------------------------------------------------------------------------------------------------------------------------------------------------------------------------------------------------------------------------------|---------------------|--------------------------------------------------------------------------------------------------------------------------------------------------------------------------------------|-----|---------------------------------|---------------------------|---------------------------------------------------------------------------------------------------------------------------------------------------------------------------------------------------------------------------------------------------------------------------------------------------------------------------------------------------------------------------------------------------------------------------------------------------------------------------------------------------------------------------------------------------------------------------------------------------------------------------------------------------------------------------------------------------------------------------------------------------------------------------------------------------------------------------------------------------------------------------------------------------------------------------------------------------------------------------------------------------------------------------------------------------------------------------------------------------------------------------------------------------------------------------------------------------------------------------------------------------------------------------------------------------------------------------------------------------------------------------------------------------------------------------------------------------------------|---------------|--------------------------------------|------|----------------------------------------|------|--|
| Santos, 2019                 | SLR (8 SLRs)                         | 6740  | RA patients                                                                                                                       | NR          | NR         | NR        | Nr            | NR | NR | NR                                                                                                                  | Psychosocial interventions                                                                                                                                                                                                                                           | 1180 (#1)           | Usual care/placebo/other non-pharmacological or non-surgical interventions                                                                                                           | #8  | Functional disability           | NR                        | Effective improvement with small positive effects; Conclusions: Of the included interventions, only multicomponent or single exercise/physical activity interventions,psychosocial interventions and custom orthoses seem to reduce the impact of rheumatoid arthritis.                                                                                                                                                                                                                                                                                                                                                                                                                                                                                                                                                                                                                                                                                                                                                                                                                                                                                                                                                                                                                                                                                                                                                                                       | Moderate      | Moderate                             |      |                                        |      |  |
|                              |                                      |       |                                                                                                                                   |             |            |           |               |    |    |                                                                                                                     |                                                                                                                                                                                                                                                                      |                     |                                                                                                                                                                                      |     |                                 |                           |                                                                                                                                                                                                                                                                                                                                                                                                                                                                                                                                                                                                                                                                                                                                                                                                                                                                                                                                                                                                                                                                                                                                                                                                                                                                                                                                                                                                                                                               |               |                                      |      |                                        |      |  |
| Pain (VAS-pain)              |                                      |       |                                                                                                                                   |             |            |           |               |    |    |                                                                                                                     |                                                                                                                                                                                                                                                                      |                     |                                                                                                                                                                                      |     |                                 |                           |                                                                                                                                                                                                                                                                                                                                                                                                                                                                                                                                                                                                                                                                                                                                                                                                                                                                                                                                                                                                                                                                                                                                                                                                                                                                                                                                                                                                                                                               |               |                                      |      |                                        |      |  |
| Dixon, 2007                  | SLR; RCT's 27 (18 RA, 7 OA, 2 mixed) | 3409  | RA and OA patients in whom psychosocial approaches to arthritis pain management and pain-related outcomes were reviewed.          | NR          | NR         | NR        | NR            | NR | NR | NA                                                                                                                  | Psychological interventions (Cognitive behavioral therapy (23 studies), stress management (5 studies), psychodynamic intervention (2 studies), biofeedback (1 study), emotional disclosure (1 study), hypnosis (1 study)                                             | NR                  | Control (usual care (14 studies), education/information control (9 studies), wait-list control (5 studies), attention control (2 studies), receiving only study medication (1 study) | NR  | Pain (15 studies)               |                           | Effect size 0.177 (95% CI 0.094-0.259), p<0.01, favours treatment; Effect sizes were similar when studies were separated into those conducted with RA vs OA patients.                                                                                                                                                                                                                                                                                                                                                                                                                                                                                                                                                                                                                                                                                                                                                                                                                                                                                                                                                                                                                                                                                                                                                                                                                                                                                         | Moderate      | Low                                  |      |                                        |      |  |
|                              |                                      |       |                                                                                                                                   |             |            |           |               |    |    |                                                                                                                     |                                                                                                                                                                                                                                                                      |                     |                                                                                                                                                                                      |     |                                 |                           |                                                                                                                                                                                                                                                                                                                                                                                                                                                                                                                                                                                                                                                                                                                                                                                                                                                                                                                                                                                                                                                                                                                                                                                                                                                                                                                                                                                                                                                               |               |                                      |      |                                        |      |  |
| Ferwerda, 2017               | RCT                                  | 133   | RA patients with elevated levels of distress as measured by heightened scores of the negative mood and anxiety scales of the IRGL | NR          | NR         | NR        | NR            | NR | NR | Depressed mood (BDI) 12.49; Negative mood (IRGL) 4.77; Anxiety (IRGL) 21.12; Pain (IRGL) 15.30; Fatigue (CIS) 37.17 | Tailored guided internet-based cognitive-behavioral treatment during 9-65W (depending on individual wishes)                                                                                                                                                          | 62                  | Usual care                                                                                                                                                                           | 71  | Pain (IRGL)                     | Post intervention (9-65W) | 14.36 (4.68)                                                                                                                                                                                                                                                                                                                                                                                                                                                                                                                                                                                                                                                                                                                                                                                                                                                                                                                                                                                                                                                                                                                                                                                                                                                                                                                                                                                                                                                  | 15.79 (4.13)  | p=0.35                               | 0.32 | High                                   |      |  |
| Hewlett, 2019                | RCT                                  | 333   | RA patients with fatigue severity of ≥6 (0-10, BRAF-NRS)                                                                          | 10Y, median | DAS28 4.22 | mHAQ 0.75 | VAS-pain 5.64 |    |    | Fatigue impact (BRAF-NRS, score 0-10): 7.16                                                                         | RAFT – Cognitive behaviour fatigue self-management programme delivered to groups of 5–7 RA patients in six 2-hour sessions (weeks 3–6) and a 1-hour consolidation session (week 14) by a pair of local rheumatology nurse specialists and/or occupational therapists | 156                 | Usual care: brief discussion of a RA fatigue self-management booklet with the research nurse.                                                                                        | 152 | VAS pain                        | 26W                       | 5.47 (2.32)                                                                                                                                                                                                                                                                                                                                                                                                                                                                                                                                                                                                                                                                                                                                                                                                                                                                                                                                                                                                                                                                                                                                                                                                                                                                                                                                                                                                                                                   | 5.24 (2.41)   | Adjusted: 0.16 (-0.33-0.65, p=0.51)  | 0.10 | Adjusted for baseline level and centre | High |  |
| Prothero, 2018               | SLR; 9 SLRs                          | 10782 | RA patients                                                                                                                       | NR          | NR         | NR        | NR            | NR | NR | NA                                                                                                                  | Psychological interventions                                                                                                                                                                                                                                          | #5 SLRs, 49 studies | Wait-list/usual care/attention placebo/education                                                                                                                                     | NR  | Pain                            | NR                        | Niemma et al. (2003)found that counselling and behaviour change interventionsdid not significantly reduce pain, however, a trend favouring behaviourchange interventions was observed. Using Cohen's classification effect sizes (Cohen, 1977), the reviews byAstin et al. (2002)andGrieff et al. (2010)reported that psychological interventions had small effecton pain reduction post intervention.Astin et al. (2002)tested the effectof psychological interventions on pain at follow-up (averaged 8.5 months) which was reduced to non-significance Cramp et al. (2013)found that 4 out of 6 studies did not show significant effects for pain.Niedermann et al. (2004)found that 2 out of 4 studies showed apositive change both in the short-term (averaged 12.5 weeks) and inlong term (averaged 10.5 months). One study, which examined theeffectiveness of cognitive behavioral therapy, showed a progressiveworsening of pain at follow-up (6 months) Thirial study findingswere non-significant post interventions, and at 12-month follow-up.; Conclusion: Psychological interventions result in small to moderate improvements in biopsychosocial outcomes for patients with rheumatoid arthritis in addition to those achieved by standard care. Several priorities for futuresearch were identified, including determining the cost effectiveness of non-psychologically trained healthprofessionals delivering psychological interventions. | Low           | Low-moderate                         |      |                                        |      |  |
|                              |                                      |       |                                                                                                                                   |             |            |           |               |    |    |                                                                                                                     |                                                                                                                                                                                                                                                                      |                     |                                                                                                                                                                                      |     |                                 |                           |                                                                                                                                                                                                                                                                                                                                                                                                                                                                                                                                                                                                                                                                                                                                                                                                                                                                                                                                                                                                                                                                                                                                                                                                                                                                                                                                                                                                                                                               |               |                                      |      |                                        |      |  |
| Santos, 2019                 | SLR (8 SLRs)                         | 6740  | RA patients                                                                                                                       | NR          | NR         | NR        | Nr            | NR | NR | NR                                                                                                                  | Psychosocial interventions                                                                                                                                                                                                                                           | 1316 (#1)           | Usual care/placebo/other non-pharmacological or non-surgical interventions                                                                                                           | #8  | Pain                            | NR                        | Effective improvement with small positive effects; Conclusions: Of the included interventions, only multicomponent or single exercise/physical activity interventions,psychosocial interventions and custom orthoses seem to reduce the impact of rheumatoid arthritis.                                                                                                                                                                                                                                                                                                                                                                                                                                                                                                                                                                                                                                                                                                                                                                                                                                                                                                                                                                                                                                                                                                                                                                                       | Moderate      | Moderate                             |      |                                        |      |  |
|                              |                                      |       |                                                                                                                                   |             |            |           |               |    |    |                                                                                                                     |                                                                                                                                                                                                                                                                      |                     |                                                                                                                                                                                      |     |                                 |                           |                                                                                                                                                                                                                                                                                                                                                                                                                                                                                                                                                                                                                                                                                                                                                                                                                                                                                                                                                                                                                                                                                                                                                                                                                                                                                                                                                                                                                                                               |               |                                      |      |                                        |      |  |
| Fatigue (FACT-F/VAS-fatigue) |                                      |       |                                                                                                                                   |             |            |           |               |    |    |                                                                                                                     |                                                                                                                                                                                                                                                                      |                     |                                                                                                                                                                                      |     |                                 |                           |                                                                                                                                                                                                                                                                                                                                                                                                                                                                                                                                                                                                                                                                                                                                                                                                                                                                                                                                                                                                                                                                                                                                                                                                                                                                                                                                                                                                                                                               |               |                                      |      |                                        |      |  |
| Ferwerda, 2017               | RCT                                  | 133   | RA patients with elevated levels of distress as measured by heightened scores of the negative mood and anxiety scales of the IRGL | NR          | NR         | NR        | NR            | NR | NR | Depressed mood (BDI) 12.49; Negative mood (IRGL) 4.77; Anxiety (IRGL) 21.12; Pain (IRGL) 15.30; Fatigue (CIS) 37.17 | Tailored guided internet-based cognitive-behavioral treatment during 9-65W (depending on individual wishes)                                                                                                                                                          | 62                  | Usual care                                                                                                                                                                           | 71  | Fatigue (CIS)                   | Post intervention (9-65W) | 32.38 (13.42)                                                                                                                                                                                                                                                                                                                                                                                                                                                                                                                                                                                                                                                                                                                                                                                                                                                                                                                                                                                                                                                                                                                                                                                                                                                                                                                                                                                                                                                 | 34.45 (12.43) | p=0.06                               | 0.16 | High                                   |      |  |
| Hewlett, 2019                | RCT                                  | 333   | RA patients with fatigue severity of ≥6 (0-10, BRAF-NRS)                                                                          | 10Y, median | DAS28 4.22 | mHAQ 0.75 | VAS-pain 5.64 |    |    | Fatigue impact (BRAF-NRS, score 0-10): 7.16                                                                         | RAFT – Cognitive behaviour fatigue self-management programme delivered to groups of 5–7 RA patients in six 2-hour sessions (weeks 3–6) and a 1-hour consolidation session (week 14) by a pair of local rheumatology nurse specialists and/or occupational therapists | 156                 | Usual care: brief discussion of a RA fatigue self-management booklet with the research nurse.                                                                                        | 152 | Fatigue impact (BRAF-NRS, 0-10) | Change from BL until 26W  | -1.36                                                                                                                                                                                                                                                                                                                                                                                                                                                                                                                                                                                                                                                                                                                                                                                                                                                                                                                                                                                                                                                                                                                                                                                                                                                                                                                                                                                                                                                         | -0.88         | Adjusted: -0.59 (-1.11-0.06, p=0.03) |      | Adjusted for baseline level and centre | High |  |
| Prothero, 2018               | SLR; 9 SLRs                          | 10782 | RA patients                                                                                                                       | NR          | NR         | NR        | NR            | NR | NR | NA                                                                                                                  | Psychological interventions                                                                                                                                                                                                                                          | #1 SLR, 13 studies  | Wait-list/usual care/attention placebo/education                                                                                                                                     | NR  | Fatigue                         | NR                        | One review (Cramp et al., 2013) reported meta-analysis for fatigue based onfindings from 13 studies. The authorsfound that psychosocial interventions reduced fatigue demonstrating a small effect. The impact of the psychosocial interventions on fatigue atfollow-up was not measured; Conclusion: Psychological interventions result in small to moderate improvements in biopsychosocial outcomesfor patients with rheumatoid arthritis in addition to those achieved by standard care. Several priorities for futuresearch were identified, including determining the cost effectiveness of non-psychologically trained healthprofessionals delivering psychological interventions.                                                                                                                                                                                                                                                                                                                                                                                                                                                                                                                                                                                                                                                                                                                                                                     | Low           | Low-moderate                         |      |                                        |      |  |

|                                                                                            |                                |       |                                                                                                                                   |     |           |    |      |      |    |    |                                                                                                                                                                                                     |                                                                                                             |                                                                                 |            |                                                                                                    |                                                                             |                                                                                                                                                                                                                                                                                                                                                                                                                                                                                                                                                                                                                                                                            |                                                                                                                                                                                                                                                                                                                         |                                                  |               |      |      |  |
|--------------------------------------------------------------------------------------------|--------------------------------|-------|-----------------------------------------------------------------------------------------------------------------------------------|-----|-----------|----|------|------|----|----|-----------------------------------------------------------------------------------------------------------------------------------------------------------------------------------------------------|-------------------------------------------------------------------------------------------------------------|---------------------------------------------------------------------------------|------------|----------------------------------------------------------------------------------------------------|-----------------------------------------------------------------------------|----------------------------------------------------------------------------------------------------------------------------------------------------------------------------------------------------------------------------------------------------------------------------------------------------------------------------------------------------------------------------------------------------------------------------------------------------------------------------------------------------------------------------------------------------------------------------------------------------------------------------------------------------------------------------|-------------------------------------------------------------------------------------------------------------------------------------------------------------------------------------------------------------------------------------------------------------------------------------------------------------------------|--------------------------------------------------|---------------|------|------|--|
| 2019                                                                                       | SLR (8 SLRs)                   | 6740  | RA patients                                                                                                                       | NR  | NR        | NR | NR   | NR   | NR | NR | Psychosocial interventions                                                                                                                                                                          | 1556 (#1)                                                                                                   | Usual care/placebo/other non-pharmacological or non-surgical interventions      | #8         | Fatigue                                                                                            | NR                                                                          | Effective improvement with small positive effects; Conclusions: Of the included interventions, only multicomponent or single exercise/physical activity interventions, psychosocial interventions and custom orthoses seem to reduce the impact of rheumatoid arthritis.                                                                                                                                                                                                                                                                                                                                                                                                   | Moderate                                                                                                                                                                                                                                                                                                                | Moderate                                         |               |      |      |  |
| Disease activity                                                                           |                                |       |                                                                                                                                   |     |           |    |      |      |    |    |                                                                                                                                                                                                     |                                                                                                             |                                                                                 |            |                                                                                                    |                                                                             |                                                                                                                                                                                                                                                                                                                                                                                                                                                                                                                                                                                                                                                                            |                                                                                                                                                                                                                                                                                                                         |                                                  |               |      |      |  |
| Proffers, 2018                                                                             | SLR: 9 SLRs                    | 10782 | RA patients                                                                                                                       | NR  | NR        | NR | NR   | NR   | NR | NA | Psychological interventions                                                                                                                                                                         | #1 SLR, 3 studies                                                                                           | Wait-list/usual care/attention placebo/education                                | NR         | Disease activity                                                                                   | NR                                                                          | Nyssen et al. (2016) found that expressive writing showed no significant effects postintervention (d = -0.02; 95% CI: -0.37, 0.32, P = 0.89). Significant effects were, however, observed as follow-up averaged 10 weeks (d = -0.61; 95%CI: -0.96, -0.26, P < 0.001). Conclusion: Psychological interventions result in small to moderate improvements in biopsychosocial outcomes for patients with rheumatoid arthritis in addition to those achieved by standard care. Several priorities for future research were identified, including determining the cost effectiveness of non-psychologically trained health professionals delivering psychological interventions. | Low                                                                                                                                                                                                                                                                                                                     | Low-moderate                                     |               |      |      |  |
| Other                                                                                      |                                |       |                                                                                                                                   |     |           |    |      |      |    |    |                                                                                                                                                                                                     |                                                                                                             |                                                                                 |            |                                                                                                    |                                                                             |                                                                                                                                                                                                                                                                                                                                                                                                                                                                                                                                                                                                                                                                            |                                                                                                                                                                                                                                                                                                                         |                                                  |               |      |      |  |
| Dissanayake, 2011                                                                          | SLR: RCTs 34                   | 2021  | RA patients in which any type of psychological intervention was used                                                              | NR  | NR        | NR | NR   | NR   | NR | NA | Disclosure therapy                                                                                                                                                                                  | 300                                                                                                         | Wait list, standard medical care, active control                                | NR         | Efficacy as defined in individual studies                                                          |                                                                             | Consistent supportive evidence                                                                                                                                                                                                                                                                                                                                                                                                                                                                                                                                                                                                                                             | This review shows consistent supportive evidence for the use of disclosure therapy, and CBT with maintenance therapy as adjunct therapies in patients with RA. It also highlights methodological limitations in the current literature and the need for future research in this area.                                   | Moderate                                         | Low-Moderate  |      |      |  |
|                                                                                            |                                |       |                                                                                                                                   |     |           |    |      |      |    |    | Cognitive behavioural therapy - maintenance therapy throughout the follow-up period: 5                                                                                                              | 887                                                                                                         |                                                                                 |            |                                                                                                    |                                                                             | Consistent supportive evidence                                                                                                                                                                                                                                                                                                                                                                                                                                                                                                                                                                                                                                             |                                                                                                                                                                                                                                                                                                                         |                                                  |               |      |      |  |
|                                                                                            |                                |       |                                                                                                                                   |     |           |    |      |      |    |    | Cognitive behavioural therapy - long (>6wk): 5                                                                                                                                                      | 322                                                                                                         |                                                                                 |            |                                                                                                    |                                                                             | Supportive evidence in the short term but conflicting evidence for its long-term efficacy                                                                                                                                                                                                                                                                                                                                                                                                                                                                                                                                                                                  |                                                                                                                                                                                                                                                                                                                         |                                                  |               |      |      |  |
|                                                                                            |                                |       |                                                                                                                                   |     |           |    |      |      |    |    | Biofeedback: 2                                                                                                                                                                                      | 86                                                                                                          |                                                                                 |            |                                                                                                    |                                                                             | Some supportive evidence                                                                                                                                                                                                                                                                                                                                                                                                                                                                                                                                                                                                                                                   |                                                                                                                                                                                                                                                                                                                         |                                                  |               |      |      |  |
|                                                                                            |                                |       |                                                                                                                                   |     |           |    |      |      |    |    | Counselling: 3                                                                                                                                                                                      | 313                                                                                                         |                                                                                 |            |                                                                                                    |                                                                             | Conflicting evidence                                                                                                                                                                                                                                                                                                                                                                                                                                                                                                                                                                                                                                                       |                                                                                                                                                                                                                                                                                                                         |                                                  |               |      |      |  |
|                                                                                            |                                |       |                                                                                                                                   |     |           |    |      |      |    |    | Psychotherapy: 2                                                                                                                                                                                    | 85                                                                                                          |                                                                                 |            |                                                                                                    |                                                                             | Conflicting evidence                                                                                                                                                                                                                                                                                                                                                                                                                                                                                                                                                                                                                                                       |                                                                                                                                                                                                                                                                                                                         |                                                  |               |      |      |  |
|                                                                                            |                                |       |                                                                                                                                   |     |           |    |      |      |    |    | Meditation and mindfulness: 2                                                                                                                                                                       | 207                                                                                                         |                                                                                 |            |                                                                                                    |                                                                             | Conflicting evidence                                                                                                                                                                                                                                                                                                                                                                                                                                                                                                                                                                                                                                                       |                                                                                                                                                                                                                                                                                                                         |                                                  |               |      |      |  |
|                                                                                            |                                |       |                                                                                                                                   |     |           |    |      |      |    |    | Cognitive behavioural therapy - short (<6wk): 6                                                                                                                                                     | 148                                                                                                         |                                                                                 |            |                                                                                                    |                                                                             | Conflicting evidence                                                                                                                                                                                                                                                                                                                                                                                                                                                                                                                                                                                                                                                       |                                                                                                                                                                                                                                                                                                                         |                                                  |               |      |      |  |
|                                                                                            |                                |       |                                                                                                                                   |     |           |    |      |      |    |    | Relaxation therapy: 2                                                                                                                                                                               | 114                                                                                                         |                                                                                 |            |                                                                                                    |                                                                             | Limited evidence                                                                                                                                                                                                                                                                                                                                                                                                                                                                                                                                                                                                                                                           |                                                                                                                                                                                                                                                                                                                         |                                                  |               |      |      |  |
| Ferwerda, 2017                                                                             | RCT                            | 133   | RA patients with elevated levels of distress as measured by heightened scores of the negative mood and anxiety scales of the IRGL | NR  | NR        | NR | NR   | NR   | NR | NR | Depressed mood (BDI) 12.49; Negative mood (IRGL) 4.77; Anxiety (IRGL) 21.12; Pain (IRGL) 15.30; Fatigue (CIS) 37.17                                                                                 | Tailored guided internet-based cognitive-behavioral treatment during 9-65W (depending on individual wishes) | 62                                                                              | Usual care | 71                                                                                                 | Depressed mood (BDI) (9-65W) Negative mood (IRGL) Post intervention (9-65W) | 8.16 (5.67) 12.27 (5.97) 2.93 (3.25) 4.54 (3.71)                                                                                                                                                                                                                                                                                                                                                                                                                                                                                                                                                                                                                           | 0.71                                                                                                                                                                                                                                                                                                                    | p=0.01; larger improvement in intervention group | 0.46          | 0.31 | High |  |
|                                                                                            |                                |       |                                                                                                                                   |     |           |    |      |      |    |    |                                                                                                                                                                                                     |                                                                                                             |                                                                                 |            | Anxiety (IRGL) Post intervention (9-65W)                                                           | 18.31 (5.44) 20.06 (5.78)                                                   |                                                                                                                                                                                                                                                                                                                                                                                                                                                                                                                                                                                                                                                                            | 0.31                                                                                                                                                                                                                                                                                                                    |                                                  |               |      |      |  |
| EDUCATION                                                                                  |                                |       |                                                                                                                                   |     |           |    |      |      |    |    |                                                                                                                                                                                                     |                                                                                                             |                                                                                 |            |                                                                                                    |                                                                             |                                                                                                                                                                                                                                                                                                                                                                                                                                                                                                                                                                                                                                                                            |                                                                                                                                                                                                                                                                                                                         |                                                  |               |      |      |  |
| Function (HAQ)                                                                             |                                |       |                                                                                                                                   |     |           |    |      |      |    |    |                                                                                                                                                                                                     |                                                                                                             |                                                                                 |            |                                                                                                    |                                                                             |                                                                                                                                                                                                                                                                                                                                                                                                                                                                                                                                                                                                                                                                            |                                                                                                                                                                                                                                                                                                                         |                                                  |               |      |      |  |
| Christie, 2007                                                                             | SLR: SLRs 28                   | NR    | RA patients                                                                                                                       | NR  | NR        | NR | NR   | NR   | NR | NA | Patient education                                                                                                                                                                                   |                                                                                                             | No intervention/usual care/other educational intervention/waiting list controls |            | Function and patient global assessment                                                             |                                                                             | Improves function and patient global assessment, high-quality beneficial effect                                                                                                                                                                                                                                                                                                                                                                                                                                                                                                                                                                                            | High-quality evidence was found for beneficial effects of joint protection and patient education, moderate-quality evidence was found for beneficial effects of herbal therapy (gamma-linolenic acid) and low-level laser therapy, and low-quality evidence was found for the effectiveness of the other interventions. | Low                                              | Moderate-High |      |      |  |
| Pain (VAS-pain)                                                                            |                                |       |                                                                                                                                   |     |           |    |      |      |    |    |                                                                                                                                                                                                     |                                                                                                             |                                                                                 |            |                                                                                                    |                                                                             |                                                                                                                                                                                                                                                                                                                                                                                                                                                                                                                                                                                                                                                                            |                                                                                                                                                                                                                                                                                                                         |                                                  |               |      |      |  |
| Manning, 2014                                                                              | RCT                            | 210   | RA patients                                                                                                                       | 20M | DAS28 5.1 | NR | 45.2 | 47.2 | NR | NA | Group session with education, self-management and global upper extremity exercise training (4 times 2/W), then functional daily home exercise regimen                                               | 52                                                                                                          | Usual care                                                                      | 56         | VAS-pain                                                                                           | Change from BL until 12W                                                    | -13.0 (-23.0, -2.9), mean (95% CI) 1.7 (-8.2, -3.2), mean (95% CI) -14.7 (-26.2, -3.2), mean (95% CI)                                                                                                                                                                                                                                                                                                                                                                                                                                                                                                                                                                      | p=0.013                                                                                                                                                                                                                                                                                                                 |                                                  | High          |      |      |  |
| Fatigue (VAS-fatigue)                                                                      |                                |       |                                                                                                                                   |     |           |    |      |      |    |    |                                                                                                                                                                                                     |                                                                                                             |                                                                                 |            |                                                                                                    |                                                                             |                                                                                                                                                                                                                                                                                                                                                                                                                                                                                                                                                                                                                                                                            |                                                                                                                                                                                                                                                                                                                         |                                                  |               |      |      |  |
| Manning, 2014                                                                              | RCT                            | 210   | RA patients                                                                                                                       | 20M | DAS28 5.1 | NR | 45.2 | 47.2 | NR | NA | Group session with education, self-management and global upper extremity exercise training (4 times 2/W), then functional daily home exercise regimen                                               | 52                                                                                                          | Usual care                                                                      | 56         | VAS-fatigue                                                                                        | Change from BL until 12W                                                    | -7.9 (-18.3, -2.6), mean (95% CI) 1.2 (-9.2, 11.5), mean (95% CI) -9.0 (-21.0, 2.9), mean (95% CI)                                                                                                                                                                                                                                                                                                                                                                                                                                                                                                                                                                         | p=0.136                                                                                                                                                                                                                                                                                                                 |                                                  | High          |      |      |  |
| Disease activity                                                                           |                                |       |                                                                                                                                   |     |           |    |      |      |    |    |                                                                                                                                                                                                     |                                                                                                             |                                                                                 |            |                                                                                                    |                                                                             |                                                                                                                                                                                                                                                                                                                                                                                                                                                                                                                                                                                                                                                                            |                                                                                                                                                                                                                                                                                                                         |                                                  |               |      |      |  |
| Manning, 2014                                                                              | RCT                            | 210   | RA patients                                                                                                                       | 20M | DAS28 5.1 | NR | 45.2 | 47.2 | NR | NA | Group session with education, self-management and global upper extremity exercise training (4 times 2/W), then functional daily home exercise regimen                                               | 52                                                                                                          | Usual care                                                                      | 56         | DAS28                                                                                              | Change from BL until 12W                                                    | -0.8 (-1.4, -0.2), mean (95% CI) -0.1 (-0.7, 0.4), mean (95% CI) 0.7 (-1.4, 0.0), mean (95% CI)                                                                                                                                                                                                                                                                                                                                                                                                                                                                                                                                                                            | p=0.047                                                                                                                                                                                                                                                                                                                 |                                                  | High          |      |      |  |
| Other                                                                                      |                                |       |                                                                                                                                   |     |           |    |      |      |    |    |                                                                                                                                                                                                     |                                                                                                             |                                                                                 |            |                                                                                                    |                                                                             |                                                                                                                                                                                                                                                                                                                                                                                                                                                                                                                                                                                                                                                                            |                                                                                                                                                                                                                                                                                                                         |                                                  |               |      |      |  |
| Carandang, 2016                                                                            | SLR: RCTs 22                   | 2600  | RA patients, studies using symptoms of RA as primary outcomes                                                                     | NR  | NR        | NR | NR   | NR   | NR | NA | Disease education, pain management, psychosocial intervention, joint protection and energy conservation, combination of educational techniques                                                      | NR                                                                                                          |                                                                                 |            | Coping skills for symptoms such as pain and fatigue Positive affect Most other measured constructs |                                                                             | Increases                                                                                                                                                                                                                                                                                                                                                                                                                                                                                                                                                                                                                                                                  | Interventions in which a combination of educational techniques is used may complement pharmacological therapies.                                                                                                                                                                                                        | Moderate                                         | Low-High      |      |      |  |
|                                                                                            |                                |       |                                                                                                                                   |     |           |    |      |      |    |    |                                                                                                                                                                                                     |                                                                                                             |                                                                                 |            |                                                                                                    |                                                                             | Increases                                                                                                                                                                                                                                                                                                                                                                                                                                                                                                                                                                                                                                                                  | Limited or no evidence supporting the effectiveness                                                                                                                                                                                                                                                                     |                                                  |               |      |      |  |
| SELF-MANAGEMENT INTERVENTIONS (combination of different non-pharmacological interventions) |                                |       |                                                                                                                                   |     |           |    |      |      |    |    |                                                                                                                                                                                                     |                                                                                                             |                                                                                 |            |                                                                                                    |                                                                             |                                                                                                                                                                                                                                                                                                                                                                                                                                                                                                                                                                                                                                                                            |                                                                                                                                                                                                                                                                                                                         |                                                  |               |      |      |  |
| Function (HAQ)                                                                             |                                |       |                                                                                                                                   |     |           |    |      |      |    |    |                                                                                                                                                                                                     |                                                                                                             |                                                                                 |            |                                                                                                    |                                                                             |                                                                                                                                                                                                                                                                                                                                                                                                                                                                                                                                                                                                                                                                            |                                                                                                                                                                                                                                                                                                                         |                                                  |               |      |      |  |
| Albano, 2010                                                                               | SLR: 7 SLRs, 10 RCTs, 20 nRCTs | 9955  | RA patients                                                                                                                       | NR  | NR        | NR | NR   | NR   | NR | NA | Educational programs (aiming at increasing knowledge and improving performance) and psycho-educational programs (combining teaching intervention activities to improve coping and change behaviour) | #5                                                                                                          | NR                                                                              | NR         | Functional status                                                                                  |                                                                             | Improvement in all 5 studies; Conclusion: Our study confirms that therapeutic patient education in rheumatology, delivered through educational or psycho-educational programs, is effective in terms of acquired knowledge, competencies and psychological improvement, whereas it brings fewer changes in health status and social well-being. The positive results are more frequently observed in short term than in long-term.                                                                                                                                                                                                                                         | Moderate                                                                                                                                                                                                                                                                                                                | High                                             |               |      |      |  |

|                  |                                |                       |                                                                               |           |       |      |       |      |      |    |                                                                                                                                                                                                                                                                                                                                                                                                                                                                                                                                                                                                                                                                                                                                                                   |         |                                                                                                                                     |     |                                                         |                          |                                                                                                                                                                                                                                                                                                                                                                                                                                                                    |                             |         |                                                                                                                                                                                                                                                                                               |          |               |
|------------------|--------------------------------|-----------------------|-------------------------------------------------------------------------------|-----------|-------|------|-------|------|------|----|-------------------------------------------------------------------------------------------------------------------------------------------------------------------------------------------------------------------------------------------------------------------------------------------------------------------------------------------------------------------------------------------------------------------------------------------------------------------------------------------------------------------------------------------------------------------------------------------------------------------------------------------------------------------------------------------------------------------------------------------------------------------|---------|-------------------------------------------------------------------------------------------------------------------------------------|-----|---------------------------------------------------------|--------------------------|--------------------------------------------------------------------------------------------------------------------------------------------------------------------------------------------------------------------------------------------------------------------------------------------------------------------------------------------------------------------------------------------------------------------------------------------------------------------|-----------------------------|---------|-----------------------------------------------------------------------------------------------------------------------------------------------------------------------------------------------------------------------------------------------------------------------------------------------|----------|---------------|
| Baxter, 2016     | RCT                            | 33                    | RA patients                                                                   | NR        | 7.01Y | 1.1  | NR    | NR   | 15.0 | NA | Walking: instructions on a walking route with three loops, to be completed 3-4 times a week                                                                                                                                                                                                                                                                                                                                                                                                                                                                                                                                                                                                                                                                       | 11      | Nutrition education session                                                                                                         | 22  | HAQ                                                     | Change from BL until 6W  | 0.0 (0.6)                                                                                                                                                                                                                                                                                                                                                                                                                                                          | <0.01 (0.6)                 | p=0.62  | 0.0                                                                                                                                                                                                                                                                                           |          | High          |
| Hammond, 2004    | RCT                            | 328                   | RA patients                                                                   | NR        | 9.5M  | 1.13 | 42.16 | NR   | NR   | NA | Occupational therapy: Five sessions: four 1h individual treatments and one 2h group arthritis education program, with additional sessions if needed, within 6-8W.                                                                                                                                                                                                                                                                                                                                                                                                                                                                                                                                                                                                 | 162     | Usual care                                                                                                                          | 164 | HAQ                                                     | Change from BL until 12M | -0.11 (95%CI -0.18 - 0.03)                                                                                                                                                                                                                                                                                                                                                                                                                                         | -0.16 (95%CI -0.25 - -0.07) | p=0.39  |                                                                                                                                                                                                                                                                                               | High     |               |
| Iversen, 2010    | SLR: 30 RCTs                   | 731 (#5, RA patients) | Patients with RA, OA, fibromyalgia and other types of inflammatory arthritis. | NR        | NR    | NR   | NR    | NR   | NR   | NA | Self-management interventions: educational, behavioural and cognitive approaches to influence health knowledge, attitudes, beliefs and behaviours to promote independence, maintain or adjust life roles, and address the psychological impact of diseases                                                                                                                                                                                                                                                                                                                                                                                                                                                                                                        | #5      | Same intervention without partner/Usual care/Information booklets/Lifestyle management for arthritis programme/Self-help guide only | NR  | Pain, function, fatigue, disease status                 | NR                       | Short-term benefits were found in four studies. Three had longer-term follow-up at 12 months, but only two showed benefits; Conclusion: Of the 30 studies identified, only 14 had follow-ups of 12 months or longer, seven of which (two of the same SMART ASMP) led to sustained benefits in pain and/or function. Little is known about benefit to beyond 12 months as only two had longer-term follow-ups, although both showed some continuing benefits.       |                             |         |                                                                                                                                                                                                                                                                                               | Moderate | Low-moderate  |
| Knittle, 2015    | RCT                            | 78                    | RA patients                                                                   | NR        | NR    | 1.12 | NR    | NR   | NR   | NA | Education session plus a motivational interview from a physical therapist and two self-regulation coaching sessions from a rheumatology nurse                                                                                                                                                                                                                                                                                                                                                                                                                                                                                                                                                                                                                     | 38      | Group-based education session led by a physical therapist                                                                           | 40  | HAQ (post-intervention)                                 | 8W                       | 0.99 (0.70)                                                                                                                                                                                                                                                                                                                                                                                                                                                        | 1.28 (0.58)                 |         | 0.45                                                                                                                                                                                                                                                                                          | High     |               |
| Mollard, 2018    | RCT                            | 36                    | RA patients                                                                   | NR        | NR    | 0.58 | 2.78  | NR   | NR   | NA | Usage of the LiveWithArthritis mobile app (supports self-management behaviours with features to monitor and manage the variables associated with RA, e.g. pain, treatment, other lifestyle and environmental data. App can provide reports that might help to identify aspect of patient lifestyle that make their arthritis better or worse and lets patients compare effectiveness of different treatment strategies)                                                                                                                                                                                                                                                                                                                                           | 21      | Usual care                                                                                                                          | 15  | HAQ-II                                                  | Change from BL until 6M  | 0.02                                                                                                                                                                                                                                                                                                                                                                                                                                                               | 0.05                        | p=0.83  |                                                                                                                                                                                                                                                                                               | High     |               |
| Srikanesan, 2019 | SLR: 6 RCTs                    | 567                   | RA patients (1 study mixed population with patients with OA and fibromyalgia) | NR        | NR    | NR   | NR    | NR   | NR   | NA | Web-based rehabilitation                                                                                                                                                                                                                                                                                                                                                                                                                                                                                                                                                                                                                                                                                                                                          | #6      | Waiting list/usual care                                                                                                             | NR  | Pain, function and quality of life                      | NR                       | Conclusion: The effects of web-based rehabilitation interventions on pain, function, quality of life, self-efficacy, rheumatoid arthritis knowledge, and physical activity are uncertain because of the very-low-quality of evidence mostly from small single trials. Adverse effects were not reported. Large, well-designed trials are needed to evaluate the clinical and cost-effectiveness of web-based rehabilitation interventions in rheumatoid arthritis. |                             |         |                                                                                                                                                                                                                                                                                               | Low      | High          |
| Pain IVAS-pain   |                                |                       |                                                                               |           |       |      |       |      |      |    |                                                                                                                                                                                                                                                                                                                                                                                                                                                                                                                                                                                                                                                                                                                                                                   |         |                                                                                                                                     |     |                                                         |                          |                                                                                                                                                                                                                                                                                                                                                                                                                                                                    |                             |         |                                                                                                                                                                                                                                                                                               |          |               |
| Albano, 2010     | SLR: 7 SLRs, 10 RCTs, 20 nRCTs | 9955                  | RA patients                                                                   | NR        | NR    | NR   | NR    | NR   | NR   | NA | Educational programs (aiming at increasing knowledge and improving performance) and psycho-educational programs (combining teaching intervention activities to improve coping and change behaviour)                                                                                                                                                                                                                                                                                                                                                                                                                                                                                                                                                               | #9      | NR                                                                                                                                  | NR  | Pain                                                    | NR                       | Improvement in all 9 studies; Conclusion: Our study confirms that therapeutic patient education in rheumatology, delivered through educational or psycho-educational programs, is effective in terms of acquired knowledge, competencies and psychological improvement, whereas it brings fewer changes in health status and social well-being. The positive results are more frequently observed in short-term than in long-term.                                 |                             |         |                                                                                                                                                                                                                                                                                               | Moderate | High          |
| Anwar, 2018      | RCT                            | 76                    | Older women with RA                                                           | NR        | NR    | NR   | NR    | NR   | NR   | NA | Self-management program: Participants in these classes followed a six week, multidisciplinary group rehabilitation program as well as a peer education program, consisting of exercise and educational components (six weekly sessions of 1-1.5h)                                                                                                                                                                                                                                                                                                                                                                                                                                                                                                                 | 39      | Control: NR                                                                                                                         | 37  | VAS-pain (score 0-100, higher score reflects more pain) | 6W                       |                                                                                                                                                                                                                                                                                                                                                                                                                                                                    |                             | p=0.498 |                                                                                                                                                                                                                                                                                               | High     |               |
| Difrenzo, 2018   | SLR: 5 RCTs                    | 399                   | RA patients                                                                   | NR        | NR    | NR   | NR    | NR   | NR   | NA | Mindfulness/vitality training program                                                                                                                                                                                                                                                                                                                                                                                                                                                                                                                                                                                                                                                                                                                             | 93 (#3) | Wait-list/cognitive behavioural therapy/education                                                                                   | 95  | VAS-pain                                                | Post-intervention        | -0.58 (-1.26-0.10)                                                                                                                                                                                                                                                                                                                                                                                                                                                 |                             |         | >0 favours control; Conclusion: There are few trials evaluating the effect of mindfulness-based interventions on outcomes in patients with RA. Preliminary findings suggest that mindfulness-based interventions may be a useful strategy to improve psychological distress in those with RA. | Low      | Moderate-High |
| El Miedany, 2012 | RCT                            | 147                   | RA patients                                                                   | NR        | 11.3Y | NR   | 9.3   | NR   | NR   | NA | After 6 months of usual care: discussion of treatment goals based on PROMs, education, joint fitness program (for patients aiming to a) give patients strategies and tools necessary to make daily decisions to cope with their disease; b) educate the patients about how to assess the main arthritis outcome measures regularly for their arthritis; c) help the patients to identify and manage the impact of arthritis on their personal life; d) show patients how to keep their muscles and joints fit; for health care professionals aiming to a) review the effects of patient education on several outcomes; b) identify the value of PROMs; c) learn how to implement PROMs in management; d) identify the role of patient education as complementary. | 74      | Usual care                                                                                                                          | 73  | VAS-pain                                                | Change from BL until 3M  | 1.44 (0.9)                                                                                                                                                                                                                                                                                                                                                                                                                                                         | 1.41 (0.9)                  | p=0.788 | 0.03                                                                                                                                                                                                                                                                                          | High     |               |
| Felthuisen, 2016 | RCT                            | 70                    | RA patients with DAS28<3.8, VAS-fatigue >50 and disease duration >3Y          | DAS28 3.4 | 12.9Y | NR   | 39.8  | 68.2 | NR   | NA | Tailored health-enhancing physical activity and balancing life activities to guide participants in managing their fatigue: starting with individual person-centred meeting during which a self-care plan was developed, then follow-up meetings/phone contacts according to each participant's preferences with a physical therapist, who supported and coached each participant                                                                                                                                                                                                                                                                                                                                                                                  | 36      | Usual care                                                                                                                          | 34  | VAS-pain (post-intervention)                            | Change from BL until 12W | -4.8 (18.4)                                                                                                                                                                                                                                                                                                                                                                                                                                                        | -1.1 (24.6)                 | p=0.46  | 0.17                                                                                                                                                                                                                                                                                          | High     |               |
| Hammond, 2004    | RCT                            | 328                   | RA patients                                                                   | NR        | 9.5M  | 1.13 | 42.16 | NR   | NR   | NA | Occupational therapy: Five sessions: four 1h individual treatments and one 2h group arthritis education program, with additional sessions if needed                                                                                                                                                                                                                                                                                                                                                                                                                                                                                                                                                                                                               | 162     | Usual care                                                                                                                          | 164 | VAS-pain                                                | Change from BL until 6M  | -4.46 (95%CI -8.44 - 0.48)                                                                                                                                                                                                                                                                                                                                                                                                                                         | -1.54 (95%CI -6.51-3.44)    | p=0.37  |                                                                                                                                                                                                                                                                                               | High     |               |
| Iversen, 2010    | SLR: 30 RCTs                   | 731 (#5, RA patients) | Patients with RA, OA, fibromyalgia and other types of inflammatory arthritis. | NR        | NR    | NR   | NR    | NR   | NR   | NA | Self-management interventions: educational, behavioural and cognitive approaches to influence health knowledge, attitudes, beliefs and behaviours to promote independence, maintain or adjust life roles, and address the psychological impact of diseases                                                                                                                                                                                                                                                                                                                                                                                                                                                                                                        | #5      | Same intervention without partner/Usual care/Information booklets/Lifestyle management for arthritis programme/Self-help guide only | NR  | Pain, function, fatigue, disease status                 | NR                       | Short-term benefits were found in four studies. Three had longer-term follow-up at 12 months, but only two showed benefits; Conclusion: Of the 30 studies identified, only 14 had follow-ups of 12 months or longer, seven of which (two of the same SMART ASMP) led to sustained benefits in pain and/or function. Little is known about benefit to beyond 12 months as only two had longer-term follow-ups, although both showed some continuing benefits.       |                             |         |                                                                                                                                                                                                                                                                                               | Moderate | Low-moderate  |
| Mollard, 2018    | RCT                            | 36                    | RA patients                                                                   | NR        | NR    | 0.58 | 2.78  | NR   | NR   | NA | Usage of the LiveWithArthritis mobile app (supports self-management behaviours with features to monitor and manage the variables associated with RA, e.g. pain, treatment, other lifestyle and environmental data. App can provide reports that might help to identify aspect of patient lifestyle that make their arthritis better or worse and lets patients compare effectiveness of different treatment strategies)                                                                                                                                                                                                                                                                                                                                           | 21      | Usual care                                                                                                                          | 15  | VAS-pain (score 0-10)                                   | Change from BL until 6M  | -0.61                                                                                                                                                                                                                                                                                                                                                                                                                                                              | 0.18                        | p=0.38  |                                                                                                                                                                                                                                                                                               | High     |               |

|                                       |                                |                       |                                                                               |           |                   |     |             |      |      |                          |                                                                                                                                                                                                                                                                                                                                                                                   |                                                  |                                                                                                                                    |                                    |                                         |                          |                           |                                                                                                                                                                                                                                                                                                                                                                                                                                                                    |                                                                                                                                                                                                                                                                                               |               |               |  |
|---------------------------------------|--------------------------------|-----------------------|-------------------------------------------------------------------------------|-----------|-------------------|-----|-------------|------|------|--------------------------|-----------------------------------------------------------------------------------------------------------------------------------------------------------------------------------------------------------------------------------------------------------------------------------------------------------------------------------------------------------------------------------|--------------------------------------------------|------------------------------------------------------------------------------------------------------------------------------------|------------------------------------|-----------------------------------------|--------------------------|---------------------------|--------------------------------------------------------------------------------------------------------------------------------------------------------------------------------------------------------------------------------------------------------------------------------------------------------------------------------------------------------------------------------------------------------------------------------------------------------------------|-----------------------------------------------------------------------------------------------------------------------------------------------------------------------------------------------------------------------------------------------------------------------------------------------|---------------|---------------|--|
| Srikesavan, 2019                      | SLR: 6 RCTs                    | 567                   | RA patients (1 study mixed population with patients with OA and fibromyalgia) | NR        | NR                | NR  | NR          | NR   | NA   | Web-based rehabilitation | #6                                                                                                                                                                                                                                                                                                                                                                                | Waiting list/usual care                          | NR                                                                                                                                 | Pain, function and quality of life | NR                                      |                          |                           | Conclusion: The effects of web-based rehabilitation interventions on pain, function, quality of life, self-efficacy, rheumatoid arthritis knowledge, and physical activity are uncertain because of the very-low-quality of evidence mostly from small single trials. Adverse effects were not reported. Large, well-designed trials are needed to evaluate the clinical and cost-effectiveness of web-based rehabilitation interventions in rheumatoid arthritis. | Low                                                                                                                                                                                                                                                                                           | High          |               |  |
| Qadiri (Q-SO)<br>Baxter, 2016         | RCT                            | 33                    | RA patients                                                                   | NR        | 7.01Y             | 1.1 | NR          | NR   | 15.0 | NA                       | Walking: instructions on a walking route with three loops, to be completed 3-4 times a week                                                                                                                                                                                                                                                                                       | 11                                               | Nutrition education session                                                                                                        | 22                                 | EQ-5D                                   | Change from BL until 6W  | 5.0 (4.8) -0.1 (5.6)      | p=0.71                                                                                                                                                                                                                                                                                                                                                                                                                                                             | 0.98                                                                                                                                                                                                                                                                                          | High          |               |  |
| Srikesavan, 2019                      | SLR: 6 RCTs                    | 567                   | RA patients (1 study mixed population with patients with OA and fibromyalgia) | NR        | NR                | NR  | NR          | NR   | NR   | NA                       | Web-based rehabilitation                                                                                                                                                                                                                                                                                                                                                          | #6                                               | Waiting list/usual care                                                                                                            | NR                                 | Pain and quality of life                | NR                       |                           | Conclusion: The effects of web-based rehabilitation interventions on pain, function, quality of life, self-efficacy, rheumatoid arthritis knowledge, and physical activity are uncertain because of the very-low-quality of evidence mostly from small single trials. Adverse effects were not reported. Large, well-designed trials are needed to evaluate the clinical and cost-effectiveness of web-based rehabilitation interventions in rheumatoid arthritis. | Low                                                                                                                                                                                                                                                                                           | High          |               |  |
| Fatigue (VAS-fatigue)<br>Albano, 2010 | SLR: 7 SLRs, 10 RCTs, 20 nRCTs | 9955                  | RA patients                                                                   | NR        | NR                | NR  | NR          | NR   | NR   | NA                       | Educational programs (aiming at increasing knowledge and improving performance) and psycho-educational programs (combining teaching intervention activities to improve coping and change behaviour)                                                                                                                                                                               | #4                                               | NR                                                                                                                                 | NR                                 | Fatigue                                 | NR                       |                           | Improvement in all 4 studies; Conclusion: Our study confirms that therapeutic patient education in rheumatology, delivered through educational or psycho-educational programs, is effective in terms of acquired knowledge, competencies and psychological improvement, whereas it brings fewer changes in health status and social well-being. The positive results are more frequently observed in short-term than in long-term.                                 | Moderate                                                                                                                                                                                                                                                                                      | High          |               |  |
| Difrenzo, 2018                        | SLR: 5 RCTs                    | 399                   | RA patients                                                                   | NR        | NR                | NR  | NR          | NR   | NR   | NA                       | Mindfulness/vitality training program                                                                                                                                                                                                                                                                                                                                             | (#2)                                             | Wait-list/cognitive behavioural therapy/education                                                                                  | NR                                 | Fatigue                                 | Post-intervention        |                           | Significant treatment effect favouring mindfulness/vitality training program; Conclusion: There are few trials evaluating the effect of mindfulness-based interventions on outcomes in patients with RA. Preliminary findings suggest that mindfulness-based interventions may be a useful strategy to improve psychological distress in those with RA.                                                                                                            | Low                                                                                                                                                                                                                                                                                           | Moderate-High |               |  |
| Feldtshuen, 2016                      | RCT                            | 70                    | RA patients with DAS28<3.8, VAS-fatigue >50 and disease duration >1Y          | DAS28 3.4 | 12.9Y             | NR  | 39.8        | 68.2 | NR   | NA                       | Tailored health-enhancing physical activity and balancing life activities to guide participants in managing their fatigue: starting with individual person-centered meeting during which a self-care plan was developed, then follow-up meetings/phone contacts according to each participant's preferences with a physical therapist, who supported and coached each participant | 36                                               | Usual care                                                                                                                         | 34                                 | VAS-fatigue (post-intervention)         | Change from BL until 12W | -23.5 (19.9) -15.3 (24.6) | p=0.042                                                                                                                                                                                                                                                                                                                                                                                                                                                            | 0.37                                                                                                                                                                                                                                                                                          | High          |               |  |
| Iversen, 2010                         | SLR: 30 RCTs                   | 731 (#5, RA patients) | Patients with RA, OA, fibromyalgia and other types of inflammatory arthritis. | NR        | NR                | NR  | NR          | NR   | NR   | NA                       | Self-management interventions: educational, behavioural and cognitive approaches to influence health knowledge, attitudes, beliefs and behaviours to promote independence, maintain or adjust life roles, and address the psychological impact of diseases                                                                                                                        | #5                                               | Same intervention without partner/Usual care/Information booklet/Lifestyle management for arthritis programme/Self-help guide only | NR                                 | Pain, function, fatigue, disease status | NR                       |                           | Short-term benefits were found in four studies. There had longer-term follow-up at 12 months, but only two showed benefits; Conclusion: Of the 30 studies identified, only 14 had follow-ups of 12 months or longer; seven of which (two of the same SMART ASMP) led to sustained benefits in pain and/or function. Little is known about benefit beyond 12 months as only two had longer-term follow-ups, although both showed some continuing benefits.          | Moderate                                                                                                                                                                                                                                                                                      | Low-moderate  |               |  |
| Disease activity<br>Albano, 2010      | SLR: 7 SLRs, 10 RCTs, 20 nRCTs | 9955                  | RA patients                                                                   | NR        | NR                | NR  | NR          | NR   | NR   | NA                       | Educational programs (aiming at increasing knowledge and improving performance) and psycho-educational programs (combining teaching intervention activities to improve coping and change behaviour)                                                                                                                                                                               | #1                                               | NR                                                                                                                                 | NR                                 | Disease activity score                  | NR                       |                           | Improvement in 1 of 1 studies; Conclusion: Our study confirms that therapeutic patient education in rheumatology, delivered through educational or psycho-educational programs, is effective in terms of acquired knowledge, competencies and psychological improvement, whereas it brings fewer changes in health status and social well-being. The positive results are more frequently observed in short-term than in long-term.                                | Moderate                                                                                                                                                                                                                                                                                      | High          |               |  |
| Difrenzo, 2018                        | SLR: 5 RCTs                    | 399                   | RA patients                                                                   | NR        | NR                | NR  | NR          | NR   | NR   | NA                       | Mindfulness/vitality training program                                                                                                                                                                                                                                                                                                                                             | 59 (#2)                                          | Wait-list/cognitive behavioural therapy/education                                                                                  | 61                                 | DAS28-CHP                               | Post-intervention        | -0.44 (-0.99-0.12)        |                                                                                                                                                                                                                                                                                                                                                                                                                                                                    | >0 favours control; Conclusion: There are few trials evaluating the effect of mindfulness-based interventions on outcomes in patients with RA. Preliminary findings suggest that mindfulness-based interventions may be a useful strategy to improve psychological distress in those with RA. | Low           | Moderate-High |  |
| Feldtshuen, 2016                      | RCT                            | 70                    | RA patients with DAS28<3.8, VAS-fatigue >50 and disease duration >1Y          | 12.9Y     | DAS28 3.4         | NR  | 39.8        | 68.2 | NR   | NA                       | Tailored health-enhancing physical activity and balancing life activities to guide participants in managing their fatigue: starting with individual person-centered meeting during which a self-care plan was developed, then follow-up meetings/phone contacts according to each participant's preferences with a physical therapist, who supported and coached each participant | 36                                               | Usual care                                                                                                                         | 34                                 | DAS28 (post-intervention)               | Change from BL until 12W | -0.3 (0.9) -0.3 (1.0)     | p=1.00                                                                                                                                                                                                                                                                                                                                                                                                                                                             | 0.0                                                                                                                                                                                                                                                                                           | High          |               |  |
| ALTERNATIVE MEDICINE                  |                                |                       |                                                                               |           |                   |     |             |      |      |                          |                                                                                                                                                                                                                                                                                                                                                                                   |                                                  |                                                                                                                                    |                                    |                                         |                          |                           |                                                                                                                                                                                                                                                                                                                                                                                                                                                                    |                                                                                                                                                                                                                                                                                               |               |               |  |
| Pain (VAS-pain)<br>Goh Meen, 2016     | RCT                            | 51                    | RA patients with pain (VAS >4) and fatigue (FSS >4)                           | 10.7Y     | DAS28 2.82 (0.88) | NR  | 6.02 (0-10) | NR   | NR   | NR                       | Fatigue (FSS) 5.60                                                                                                                                                                                                                                                                                                                                                                | Aromatherapy (3/W for 3M on both knees, at home) | 17                                                                                                                                 | Usual care                         | 17                                      | VAS-pain                 | 6W                        | 1.59 (1.17) 4.29 (2.38)                                                                                                                                                                                                                                                                                                                                                                                                                                            | p=0.001                                                                                                                                                                                                                                                                                       | 1.44          | High          |  |
| Lee, 2014                             | SLR: RCTs 1                    | 80                    | RA patients                                                                   | 7.3-9.2Y  | NR                | NR  | NR          | NR   | NR   | NA                       | Bee venom acupuncture (ashi points, acupoints near the inflammation point, 1/W)                                                                                                                                                                                                                                                                                                   | 37                                               | Usual care                                                                                                                         | 17                                 | VAS-pain                                | 6W                       | 0.56 (1.14) 4.29 (2.38)   | p=0.001                                                                                                                                                                                                                                                                                                                                                                                                                                                            | 2.00                                                                                                                                                                                                                                                                                          | Low           | High          |  |
| Macfarlane, 2012                      | SLR: RCTs 11                   | 672                   | RA patients receiving complementary therapy                                   | NR        | NR                | NR  | NR          | NR   | NR   | NA                       | Acupuncture (traditional Chinese acupuncture, electrical current acupuncture, single-point acupuncture or undefined acupuncture)                                                                                                                                                                                                                                                  | 119 (3 studies)                                  | Sham acupuncture                                                                                                                   | 65                                 | Pain reduction                          |                          |                           | ns                                                                                                                                                                                                                                                                                                                                                                                                                                                                 | Low-quality evidence that bee venom acupuncture can significantly reduce pain, morning stiffness, tender joint counts, swollen joint counts and improve QoL. No good evidence of efficacy or effectiveness for the practitioner-based complementary therapies considered here.                | Moderate      | Moderate      |  |
|                                       |                                |                       |                                                                               |           |                   |     |             |      |      |                          | (Mindfulness) meditation                                                                                                                                                                                                                                                                                                                                                          | 79 (2 studies)                                   | Waitlist controls or cognitive behavioural therapy for pain education                                                              | 128                                | Pain                                    |                          |                           | ns                                                                                                                                                                                                                                                                                                                                                                                                                                                                 |                                                                                                                                                                                                                                                                                               |               |               |  |
|                                       |                                |                       |                                                                               |           |                   |     |             |      |      |                          | Autogenic training                                                                                                                                                                                                                                                                                                                                                                | 18 (1 study)                                     | Auricular acupuncture                                                                                                              | 16                                 | Pain                                    |                          |                           | ns                                                                                                                                                                                                                                                                                                                                                                                                                                                                 |                                                                                                                                                                                                                                                                                               |               |               |  |
|                                       |                                |                       |                                                                               |           |                   |     |             |      |      |                          | Healing therapy                                                                                                                                                                                                                                                                                                                                                                   | 15 (1 study)                                     | Usual care                                                                                                                         | 14                                 | Pain                                    |                          |                           | ns                                                                                                                                                                                                                                                                                                                                                                                                                                                                 |                                                                                                                                                                                                                                                                                               |               |               |  |
|                                       |                                |                       |                                                                               |           |                   |     |             |      |      |                          | Progressive muscle relaxation                                                                                                                                                                                                                                                                                                                                                     | 44 (1 study)                                     | Cognitive behavioural therapy                                                                                                      | 124                                | Pain                                    |                          |                           | ns                                                                                                                                                                                                                                                                                                                                                                                                                                                                 |                                                                                                                                                                                                                                                                                               |               |               |  |

|                              |              |      |                                                       |                                             |                   |                                         |               |               |    |                                                                                                                                                                                              |                                                                                                                         |                                                                                                                                  |                                                                                                          |                               |                                                     |                                                     |               |                |                   |                            |                                                                                                                                                                                                                                                                                 |                                                                                                                                                                                                                                                                                |          |          |  |  |  |  |  |  |  |  |  |  |  |  |  |  |  |  |  |
|------------------------------|--------------|------|-------------------------------------------------------|---------------------------------------------|-------------------|-----------------------------------------|---------------|---------------|----|----------------------------------------------------------------------------------------------------------------------------------------------------------------------------------------------|-------------------------------------------------------------------------------------------------------------------------|----------------------------------------------------------------------------------------------------------------------------------|----------------------------------------------------------------------------------------------------------|-------------------------------|-----------------------------------------------------|-----------------------------------------------------|---------------|----------------|-------------------|----------------------------|---------------------------------------------------------------------------------------------------------------------------------------------------------------------------------------------------------------------------------------------------------------------------------|--------------------------------------------------------------------------------------------------------------------------------------------------------------------------------------------------------------------------------------------------------------------------------|----------|----------|--|--|--|--|--|--|--|--|--|--|--|--|--|--|--|--|--|
|                              |              |      |                                                       |                                             |                   |                                         |               |               |    |                                                                                                                                                                                              | Static magnets                                                                                                          | 38 (1 study)                                                                                                                     | Low magnetic strength control                                                                            | 36                            | Pain                                                |                                                     |               |                |                   | ns                         |                                                                                                                                                                                                                                                                                 |                                                                                                                                                                                                                                                                                |          |          |  |  |  |  |  |  |  |  |  |  |  |  |  |  |  |  |  |
| <b>Fatigue (VAS-fatigue)</b> |              |      |                                                       |                                             |                   |                                         |               |               |    |                                                                                                                                                                                              |                                                                                                                         |                                                                                                                                  |                                                                                                          |                               |                                                     |                                                     |               |                |                   |                            |                                                                                                                                                                                                                                                                                 |                                                                                                                                                                                                                                                                                |          |          |  |  |  |  |  |  |  |  |  |  |  |  |  |  |  |  |  |
| <b>Gök Metin, 2016</b>       | RCT          | 51   | RA patients with pain (VAS 2-4) and fatigue (FSS 2-4) | 10.7Y                                       | DAS28 2.82 (0.88) | NR                                      | 6.02 (0-10)   | NR            | NR | Fatigue (FSS) 5.60                                                                                                                                                                           | Aromatherapy (3/W for 30m on both knees, at home)                                                                       | 17                                                                                                                               | Usual care                                                                                               | 17                            | Fatigue (FSS)                                       | 6W                                                  | 2.94 (1.13)   | 4.41 (1.79)    | p<0.001           | 0.98                       | High                                                                                                                                                                                                                                                                            |                                                                                                                                                                                                                                                                                |          |          |  |  |  |  |  |  |  |  |  |  |  |  |  |  |  |  |  |
|                              |              |      |                                                       |                                             |                   |                                         |               |               |    |                                                                                                                                                                                              | Reflexology (1/W for 40min on both feet, at home)                                                                       | 17                                                                                                                               | Usual care                                                                                               | 17                            | Fatigue (FSS)                                       | 6W                                                  | 1.88 (1.18)   | 4.41 (1.79)    | p<0.001           | 1.67                       |                                                                                                                                                                                                                                                                                 |                                                                                                                                                                                                                                                                                |          |          |  |  |  |  |  |  |  |  |  |  |  |  |  |  |  |  |  |
| <b>Other</b>                 |              |      |                                                       |                                             |                   |                                         |               |               |    |                                                                                                                                                                                              |                                                                                                                         |                                                                                                                                  |                                                                                                          |                               |                                                     |                                                     |               |                |                   |                            |                                                                                                                                                                                                                                                                                 |                                                                                                                                                                                                                                                                                |          |          |  |  |  |  |  |  |  |  |  |  |  |  |  |  |  |  |  |
| <b>Jiang, 2018</b>           | RCT          | 60   | RA patients with unilateral elbow stiffness           | NR                                          | NR                | NR                                      | NR            | NR            | NR | Maximum angle of active extension position of elbow, mean: 37.2; Maximum angle of active flexion position of elbow, mean: 89.1; Maximum angle of active flexion position of elbow, mean 51.9 | Acupotomy losing (tender point in lateral elbow joint was taken as treatment point, 1/W)                                | 20                                                                                                                               | Usual care                                                                                               | 20                            | Maximum angle of active extension position of elbow | 4W                                                  | 7.01 (4.85)   | 32.87 (10.24)  | p<0.05            | 3.23                       | High                                                                                                                                                                                                                                                                            |                                                                                                                                                                                                                                                                                |          |          |  |  |  |  |  |  |  |  |  |  |  |  |  |  |  |  |  |
|                              |              |      |                                                       |                                             |                   |                                         |               |               |    |                                                                                                                                                                                              | Acupotomy losing (tender point in lateral elbow joint was taken as treatment point, 1/W)                                | Electroacupuncture (Acupoint of Tianzhu was selected as treatment point, 6/W)                                                    | 20                                                                                                       | Usual care                    | 20                                                  | Maximum angle of active flexion position of elbow   | 4W            | 112.14 (9.14)  | 90.87 (15.25)     | p<0.05                     |                                                                                                                                                                                                                                                                                 | 1.69                                                                                                                                                                                                                                                                           |          |          |  |  |  |  |  |  |  |  |  |  |  |  |  |  |  |  |  |
|                              |              |      |                                                       |                                             |                   |                                         |               |               |    |                                                                                                                                                                                              |                                                                                                                         |                                                                                                                                  |                                                                                                          |                               |                                                     | Range of motion                                     | 4W            | 105.13 (15.84) | 58.00 (7.45)      | p<0.05                     |                                                                                                                                                                                                                                                                                 | 3.81                                                                                                                                                                                                                                                                           |          |          |  |  |  |  |  |  |  |  |  |  |  |  |  |  |  |  |  |
|                              |              |      |                                                       |                                             |                   |                                         |               |               |    |                                                                                                                                                                                              |                                                                                                                         |                                                                                                                                  |                                                                                                          |                               |                                                     | Maximum angle of active extension position of elbow | 4W            | 7.01 (4.85)    | 112.14 (9.14)     | p<0.05                     |                                                                                                                                                                                                                                                                                 | 14.37                                                                                                                                                                                                                                                                          |          |          |  |  |  |  |  |  |  |  |  |  |  |  |  |  |  |  |  |
|                              |              |      |                                                       |                                             |                   |                                         |               |               |    |                                                                                                                                                                                              |                                                                                                                         |                                                                                                                                  |                                                                                                          |                               |                                                     | Maximum angle of active flexion position of elbow   | 4W            | 112.14 (9.14)  | 98.50 (15.67)     | p<0.05                     |                                                                                                                                                                                                                                                                                 | 1.06                                                                                                                                                                                                                                                                           |          |          |  |  |  |  |  |  |  |  |  |  |  |  |  |  |  |  |  |
|                              |              |      |                                                       |                                             |                   |                                         |               |               |    |                                                                                                                                                                                              |                                                                                                                         |                                                                                                                                  |                                                                                                          |                               |                                                     | Range of motion                                     | 4W            | 105.13 (15.84) | 90.87 (15.25)     | p<0.05                     |                                                                                                                                                                                                                                                                                 | 0.92                                                                                                                                                                                                                                                                           |          |          |  |  |  |  |  |  |  |  |  |  |  |  |  |  |  |  |  |
|                              |              |      |                                                       |                                             |                   |                                         |               |               |    |                                                                                                                                                                                              | Electroacupuncture (Acupoint of Tianzhu was selected as treatment point, 6/W)                                           | 20                                                                                                                               | Usual care                                                                                               | 20                            |                                                     | Maximum angle of active extension position of elbow | 4W            | 112.14 (9.14)  | 32.87 (10.24)     | p<0.05                     |                                                                                                                                                                                                                                                                                 | 8.17                                                                                                                                                                                                                                                                           |          |          |  |  |  |  |  |  |  |  |  |  |  |  |  |  |  |  |  |
|                              |              |      |                                                       |                                             |                   |                                         |               |               |    |                                                                                                                                                                                              |                                                                                                                         |                                                                                                                                  |                                                                                                          |                               |                                                     | Maximum angle of active flexion position of elbow   | 4W            | 98.50 (15.67)  | 90.87 (15.25)     | p<0.05                     |                                                                                                                                                                                                                                                                                 | 0.49                                                                                                                                                                                                                                                                           |          |          |  |  |  |  |  |  |  |  |  |  |  |  |  |  |  |  |  |
|                              |              |      |                                                       |                                             |                   |                                         |               |               |    |                                                                                                                                                                                              |                                                                                                                         |                                                                                                                                  |                                                                                                          |                               |                                                     | Range of motion                                     | 4W            | 90.87 (15.25)  | 58.00 (7.45)      | p<0.05                     |                                                                                                                                                                                                                                                                                 | 2.74                                                                                                                                                                                                                                                                           |          |          |  |  |  |  |  |  |  |  |  |  |  |  |  |  |  |  |  |
| <b>Lee, 2014</b>             | SLR: RCTs    | 1    | 80                                                    | RA patients                                 | 7.3-9.2Y          | NR                                      | NR            | NR            | NR | NR                                                                                                                                                                                           | NA                                                                                                                      | Bee venom acupuncture (ashi points, acupoints near the inflammation point, 2/W)                                                  | 37                                                                                                       | Placebo                       | 37                                                  | Morning stiffness                                   | 2M            |                |                   | -0.70 [-1.2, -0.00 - 0.60] | p<0.05                                                                                                                                                                                                                                                                          | Low-quality evidence that bee venom acupuncture can significantly reduce pain, morning stiffness, tender joint counts, swollen joint counts and improve QoL. No good evidence of efficacy or effectiveness for the practitioner-based complementary therapies considered here. | Low      | High     |  |  |  |  |  |  |  |  |  |  |  |  |  |  |  |  |  |
| <b>Macfarlane, 2012</b>      | SLR: RCTs    | 11   | 672                                                   | RA patients receiving complementary therapy | NR                | NR                                      | NR            | NR            | NR | NR                                                                                                                                                                                           | NA                                                                                                                      | Acupuncture (traditional Chinese acupuncture, electrical current acupuncture, single-point acupuncture or undefined acupuncture) | 119 (3 studies)                                                                                          | Sham acupuncture              | 65                                                  | Patient global assessment                           |               |                |                   |                            | Improvement                                                                                                                                                                                                                                                                     |                                                                                                                                                                                                                                                                                | Moderate | Moderate |  |  |  |  |  |  |  |  |  |  |  |  |  |  |  |  |  |
|                              |              |      |                                                       |                                             |                   |                                         |               |               |    |                                                                                                                                                                                              |                                                                                                                         | Healing therapy                                                                                                                  | 15 (1 study)                                                                                             | Usual care                    | 14                                                  | Patient global assessment                           |               |                |                   |                            | Improvement                                                                                                                                                                                                                                                                     |                                                                                                                                                                                                                                                                                |          |          |  |  |  |  |  |  |  |  |  |  |  |  |  |  |  |  |  |
|                              |              |      |                                                       |                                             |                   |                                         |               |               |    |                                                                                                                                                                                              |                                                                                                                         | Static magnets                                                                                                                   | 38 (1 study)                                                                                             | Low magnetic strength control | 36                                                  | Patient global assessment                           |               |                |                   |                            | Improvement                                                                                                                                                                                                                                                                     |                                                                                                                                                                                                                                                                                |          |          |  |  |  |  |  |  |  |  |  |  |  |  |  |  |  |  |  |
|                              |              |      |                                                       |                                             |                   |                                         |               |               |    |                                                                                                                                                                                              |                                                                                                                         |                                                                                                                                  |                                                                                                          |                               |                                                     |                                                     |               |                |                   |                            |                                                                                                                                                                                                                                                                                 |                                                                                                                                                                                                                                                                                |          |          |  |  |  |  |  |  |  |  |  |  |  |  |  |  |  |  |  |
| <b>CRYOTHERAPY</b>           |              |      |                                                       |                                             |                   |                                         |               |               |    |                                                                                                                                                                                              |                                                                                                                         |                                                                                                                                  |                                                                                                          |                               |                                                     |                                                     |               |                |                   |                            |                                                                                                                                                                                                                                                                                 |                                                                                                                                                                                                                                                                                |          |          |  |  |  |  |  |  |  |  |  |  |  |  |  |  |  |  |  |
| <b>Function (HAQ)</b>        |              |      |                                                       |                                             |                   |                                         |               |               |    |                                                                                                                                                                                              |                                                                                                                         |                                                                                                                                  |                                                                                                          |                               |                                                     |                                                     |               |                |                   |                            |                                                                                                                                                                                                                                                                                 |                                                                                                                                                                                                                                                                                |          |          |  |  |  |  |  |  |  |  |  |  |  |  |  |  |  |  |  |
| <b>Glinka, 2015</b>          | Non-RCT      | 44   | Postmenopausal women with RA                          | 10.9Y                                       | DAS28 5.14        | 2.21 (Intervention: 1.82; Control 2.72) | 57.00         | NR            | NR | NA                                                                                                                                                                                           | Whole-body cryotherapy (5/W for 3min)                                                                                   | 25                                                                                                                               | Traditional rehabilitation                                                                               | 19                            | HAQ                                                 | 12W                                                 | 1.64 (1.19)   | 2.12 (1.30)    | p<0.0116          | 0.39                       | High                                                                                                                                                                                                                                                                            |                                                                                                                                                                                                                                                                                |          |          |  |  |  |  |  |  |  |  |  |  |  |  |  |  |  |  |  |
|                              |              |      |                                                       |                                             |                   |                                         |               |               |    |                                                                                                                                                                                              |                                                                                                                         |                                                                                                                                  |                                                                                                          |                               |                                                     |                                                     |               |                |                   |                            |                                                                                                                                                                                                                                                                                 |                                                                                                                                                                                                                                                                                |          |          |  |  |  |  |  |  |  |  |  |  |  |  |  |  |  |  |  |
| <b>Jastrzabek, 2013</b>      | RCT          | 40   | RA patients                                           | 13.55Y                                      | DAS28 6.15        | 1.2                                     | 66.5          | 63.4          | NR | NA                                                                                                                                                                                           | Nitrogen vapour treatment (3 min liquid nitrogen flow treatment, -160 °C, 1/D knee joints and 1/D joints of both hands) | 20                                                                                                                               | Cold air treatment (3 min cool air flow treatment, -30 °C, 1/D knee joints and 1/D joints of both hands) | 20                            | HAQ-DI                                              | 100                                                 | 0.9 (0.6)     | 0.9 (0.3)      | p= 0.0787         | 0.0                        | High                                                                                                                                                                                                                                                                            |                                                                                                                                                                                                                                                                                |          |          |  |  |  |  |  |  |  |  |  |  |  |  |  |  |  |  |  |
|                              |              |      |                                                       |                                             |                   |                                         |               |               |    |                                                                                                                                                                                              |                                                                                                                         |                                                                                                                                  |                                                                                                          |                               |                                                     |                                                     |               |                |                   |                            |                                                                                                                                                                                                                                                                                 |                                                                                                                                                                                                                                                                                |          |          |  |  |  |  |  |  |  |  |  |  |  |  |  |  |  |  |  |
|                              |              |      |                                                       |                                             |                   |                                         |               |               |    |                                                                                                                                                                                              |                                                                                                                         |                                                                                                                                  |                                                                                                          |                               |                                                     |                                                     |               |                |                   |                            |                                                                                                                                                                                                                                                                                 |                                                                                                                                                                                                                                                                                |          |          |  |  |  |  |  |  |  |  |  |  |  |  |  |  |  |  |  |
| <b>Pain (VAS-pain)</b>       |              |      |                                                       |                                             |                   |                                         |               |               |    |                                                                                                                                                                                              |                                                                                                                         |                                                                                                                                  |                                                                                                          |                               |                                                     |                                                     |               |                |                   |                            |                                                                                                                                                                                                                                                                                 |                                                                                                                                                                                                                                                                                |          |          |  |  |  |  |  |  |  |  |  |  |  |  |  |  |  |  |  |
| <b>Glinka, 2015</b>          | Non-RCT      | 44   | Postmenopausal women with RA                          | 10.9Y                                       | DAS28 5.14        | 2.21 (Intervention: 1.82; Control 2.72) | 57.00         | NR            | NR | NA                                                                                                                                                                                           | Whole-body cryotherapy (5/W for 3min)                                                                                   | 25                                                                                                                               | Traditional rehabilitation                                                                               | 19                            | VAS-pain                                            | 12W                                                 | 40.80 (17.93) | 52.95 (16.36)  | p=0.7581          | 0.71                       | High                                                                                                                                                                                                                                                                            |                                                                                                                                                                                                                                                                                |          |          |  |  |  |  |  |  |  |  |  |  |  |  |  |  |  |  |  |
|                              |              |      |                                                       |                                             |                   |                                         |               |               |    |                                                                                                                                                                                              |                                                                                                                         |                                                                                                                                  |                                                                                                          |                               |                                                     |                                                     |               |                |                   |                            |                                                                                                                                                                                                                                                                                 |                                                                                                                                                                                                                                                                                |          |          |  |  |  |  |  |  |  |  |  |  |  |  |  |  |  |  |  |
| <b>Jastrzabek, 2013</b>      | RCT          | 40   | RA patients                                           | 13.55Y                                      | DAS28 6.15        | 1.2                                     | 66.5          | 63.4          | NR | NA                                                                                                                                                                                           | Nitrogen vapour treatment (3 min liquid nitrogen flow treatment, -160 °C, 1/D knee joints and 1/D joints of both hands) | 20                                                                                                                               | Cold air treatment (3 min cool air flow treatment, -30 °C, 1/D knee joints and 1/D joints of both hands) | 20                            | VAS-pain                                            | 100                                                 | 32.5 (20.3)   | 40.1 (24.3)    | p= 0.4989         | 0.34                       | High                                                                                                                                                                                                                                                                            |                                                                                                                                                                                                                                                                                |          |          |  |  |  |  |  |  |  |  |  |  |  |  |  |  |  |  |  |
|                              |              |      |                                                       |                                             |                   |                                         |               |               |    |                                                                                                                                                                                              |                                                                                                                         |                                                                                                                                  |                                                                                                          |                               |                                                     |                                                     |               |                |                   |                            |                                                                                                                                                                                                                                                                                 |                                                                                                                                                                                                                                                                                |          |          |  |  |  |  |  |  |  |  |  |  |  |  |  |  |  |  |  |
|                              |              |      |                                                       |                                             |                   |                                         |               |               |    |                                                                                                                                                                                              |                                                                                                                         |                                                                                                                                  |                                                                                                          |                               |                                                     |                                                     |               |                |                   |                            |                                                                                                                                                                                                                                                                                 |                                                                                                                                                                                                                                                                                |          |          |  |  |  |  |  |  |  |  |  |  |  |  |  |  |  |  |  |
| <b>Fatigue (VAS-fatigue)</b> |              |      |                                                       |                                             |                   |                                         |               |               |    |                                                                                                                                                                                              |                                                                                                                         |                                                                                                                                  |                                                                                                          |                               |                                                     |                                                     |               |                |                   |                            |                                                                                                                                                                                                                                                                                 |                                                                                                                                                                                                                                                                                |          |          |  |  |  |  |  |  |  |  |  |  |  |  |  |  |  |  |  |
| <b>Jastrzabek, 2013</b>      | RCT          | 40   | RA patients                                           | 13.55Y                                      | DAS28 6.15        | 1.2                                     | 66.5          | 63.4          | NR | NA                                                                                                                                                                                           | Nitrogen vapour treatment (3 min liquid nitrogen flow treatment, -160 °C, 1/D knee joints and 1/D joints of both hands) | 20                                                                                                                               | Cold air treatment (3 min cool air flow treatment, -30 °C, 1/D knee joints and 1/D joints of both hands) | 20                            | VAS-fatigue                                         | 100                                                 | 36.5 (23.1)   | 34.4 (22.1)    | p= 0.1478         | 0.09                       | High                                                                                                                                                                                                                                                                            |                                                                                                                                                                                                                                                                                |          |          |  |  |  |  |  |  |  |  |  |  |  |  |  |  |  |  |  |
|                              |              |      |                                                       |                                             |                   |                                         |               |               |    |                                                                                                                                                                                              |                                                                                                                         |                                                                                                                                  |                                                                                                          |                               |                                                     |                                                     |               |                |                   |                            |                                                                                                                                                                                                                                                                                 |                                                                                                                                                                                                                                                                                |          |          |  |  |  |  |  |  |  |  |  |  |  |  |  |  |  |  |  |
| <b>Disease activity</b>      |              |      |                                                       |                                             |                   |                                         |               |               |    |                                                                                                                                                                                              |                                                                                                                         |                                                                                                                                  |                                                                                                          |                               |                                                     |                                                     |               |                |                   |                            |                                                                                                                                                                                                                                                                                 |                                                                                                                                                                                                                                                                                |          |          |  |  |  |  |  |  |  |  |  |  |  |  |  |  |  |  |  |
| <b>Jastrzabek, 2013</b>      | RCT          | 40   | RA patients                                           | 13.55Y                                      | DAS28 6.15        | 1.2                                     | 66.5          | 63.4          | NR | NA                                                                                                                                                                                           | Nitrogen vapour treatment (3 min liquid nitrogen flow treatment, -160 °C, 1/D knee joints and 1/D joints of both hands) | 20                                                                                                                               | Cold air treatment (3 min cool air flow treatment, -30 °C, 1/D knee joints and 1/D joints of both hands) | 20                            | DAS28                                               | 100                                                 | 4.96 (1.07)   | 5.10 (1.04)    | p= 0.6849         | 0.13                       | High                                                                                                                                                                                                                                                                            |                                                                                                                                                                                                                                                                                |          |          |  |  |  |  |  |  |  |  |  |  |  |  |  |  |  |  |  |
|                              |              |      |                                                       |                                             |                   |                                         |               |               |    |                                                                                                                                                                                              |                                                                                                                         |                                                                                                                                  |                                                                                                          |                               |                                                     |                                                     |               |                |                   |                            |                                                                                                                                                                                                                                                                                 |                                                                                                                                                                                                                                                                                |          |          |  |  |  |  |  |  |  |  |  |  |  |  |  |  |  |  |  |
| <b>BALNEOTHERAPY</b>         |              |      |                                                       |                                             |                   |                                         |               |               |    |                                                                                                                                                                                              |                                                                                                                         |                                                                                                                                  |                                                                                                          |                               |                                                     |                                                     |               |                |                   |                            |                                                                                                                                                                                                                                                                                 |                                                                                                                                                                                                                                                                                |          |          |  |  |  |  |  |  |  |  |  |  |  |  |  |  |  |  |  |
| <b>Function (HAQ)</b>        |              |      |                                                       |                                             |                   |                                         |               |               |    |                                                                                                                                                                                              |                                                                                                                         |                                                                                                                                  |                                                                                                          |                               |                                                     |                                                     |               |                |                   |                            |                                                                                                                                                                                                                                                                                 |                                                                                                                                                                                                                                                                                |          |          |  |  |  |  |  |  |  |  |  |  |  |  |  |  |  |  |  |
| <b>Amengret, 2016</b>        | RCT          | 98   | All RA patients                                       | NR                                          | NR                | 0.94 (0.57)                             | 5.45          | NR            | NR | NA                                                                                                                                                                                           | Radon spa therapy (every 2-30 for 20min)                                                                                | 50                                                                                                                               | Tap water bath (every 2-30 for 20min)                                                                    | 48                            | HAQ                                                 | Change from BL until 26D                            | 0.08 (0.39)   | 0.10 (0.29)    |                   | 0.06                       | High                                                                                                                                                                                                                                                                            |                                                                                                                                                                                                                                                                                |          |          |  |  |  |  |  |  |  |  |  |  |  |  |  |  |  |  |  |
| <b>Santos, 2016</b>          | RCT          | 44   | RA patients                                           | NR                                          | DAS28 4.73 (1.53) | 1.42 (0.72)                             | 48.07 (26.48) | 56.36 (28.70) | NR | VAS-QoL 47.05 (21.74)                                                                                                                                                                        | Spa therapy (Sulphur bath treatments, 1/D)                                                                              | 22                                                                                                                               | Usual care                                                                                               | 22                            | HAQ-DI                                              | 21D                                                 |               |                | +0.37 (0.09-0.64) | p<0.01                     | Adjusted for baseline                                                                                                                                                                                                                                                           | High                                                                                                                                                                                                                                                                           |          |          |  |  |  |  |  |  |  |  |  |  |  |  |  |  |  |  |  |
| <b>Santos, 2019</b>          | SLR (8 SLRs) | 6740 | RA patients                                           | NR                                          | NR                | NR                                      | Nr            | NR            | NR | NR                                                                                                                                                                                           | Hydrotherapy/balneotherapy                                                                                              | 998 (#2)                                                                                                                         | Usual care/placebo/other non-pharmacological or non-surgical interventions                               | #8                            | Functional disability                               | NR                                                  |               |                |                   |                            | No effect or difference compared to a control treatment; Conclusions: Of the included interventions, only multicomponent or single exercise/physical activity interventions, psychological interventions and custom orthoses seem to reduce the impact of rheumatoid arthritis. | Moderate                                                                                                                                                                                                                                                                       | Moderate |          |  |  |  |  |  |  |  |  |  |  |  |  |  |  |  |  |  |
|                              |              |      |                                                       |                                             |                   |                                         |               |               |    |                                                                                                                                                                                              |                                                                                                                         |                                                                                                                                  |                                                                                                          |                               |                                                     |                                                     |               |                |                   |                            |                                                                                                                                                                                                                                                                                 |                                                                                                                                                                                                                                                                                |          |          |  |  |  |  |  |  |  |  |  |  |  |  |  |  |  |  |  |
| <b>Pain (VAS-pain)</b>       |              |      |                                                       |                                             |                   |                                         |               |               |    |                                                                                                                                                                                              |                                                                                                                         |                                                                                                                                  |                                                                                                          |                               |                                                     |                                                     |               |                |                   |                            |                                                                                                                                                                                                                                                                                 |                                                                                                                                                                                                                                                                                |          |          |  |  |  |  |  |  |  |  |  |  |  |  |  |  |  |  |  |

|                                          |              |                            |                                                                                                            |                                      |                                                                                         |                                                                                   |               |               |     |                       |                                                                                                                                                                                                                 |              |                                                                                                                             |              |                                   |                          |                                   |                                  |                                                                                                                                                                                                                                                                                 |        |                   |      |
|------------------------------------------|--------------|----------------------------|------------------------------------------------------------------------------------------------------------|--------------------------------------|-----------------------------------------------------------------------------------------|-----------------------------------------------------------------------------------|---------------|---------------|-----|-----------------------|-----------------------------------------------------------------------------------------------------------------------------------------------------------------------------------------------------------------|--------------|-----------------------------------------------------------------------------------------------------------------------------|--------------|-----------------------------------|--------------------------|-----------------------------------|----------------------------------|---------------------------------------------------------------------------------------------------------------------------------------------------------------------------------------------------------------------------------------------------------------------------------|--------|-------------------|------|
| Alam, 2018                               | RCT          | 30                         | All RA patients                                                                                            | NR                                   | NR                                                                                      | NR                                                                                | 48.1          | NR            | NR  | NA                    | Swan therapy (saud bathing and massage with olive oil for 7D)                                                                                                                                                   | 15           | Traditional exercise program (3 sessions a week for 2M) including hot application                                           | 15           | VAS-pain                          | NR                       | 37.1 (18.1)                       | 51.1 (13.3)                      | 0.005                                                                                                                                                                                                                                                                           | 0.88   |                   | High |
| Santos, 2016                             | RCT          | 44                         | RA patients                                                                                                | NR                                   | DA528 4.73 (1.53)                                                                       | 1.42 (0.72)                                                                       | 48.07 (26.48) | 56.36 (28.70) | NR  | VAS-QoL 47.05 (21.74) | Spa therapy (Sulphur bath treatments, 1/D)                                                                                                                                                                      | 22           | Usual care                                                                                                                  | 22           | VAS-pain                          | 21D                      | +10.19 (-3.47-23.86)              | p=0.140                          | Adjusted for baseline                                                                                                                                                                                                                                                           |        | High              |      |
| Santos, 2019                             | SLR (8 SLRs) | 6740                       | RA patients                                                                                                | NR                                   | NR                                                                                      | NR                                                                                | Nr            | NR            | NR  | NR                    | Hydrotherapy/balneotherapy                                                                                                                                                                                      | 998 (#2)     | Usual care/placebo/other non-pharmacological or non-surgical interventions                                                  | #8           | Pain                              | NR                       |                                   |                                  | No effect or difference compared to a control treatment; Conclusions: Of the included interventions, only multicomponent or single exercise/physical activity interventions,psychosocial interventions and custom orthoses seem to reduce the impact of rheumatoid arthritis.   |        | Moderate Moderate |      |
| QoL (EQ-5D)<br>Santos, 2016              | RCT          | 44                         | RA patients                                                                                                | NR                                   | DA528 4.73 (1.53)                                                                       | 1.42 (0.72)                                                                       | 48.07 (26.48) | 56.36 (28.70) | NR  | VAS-QoL 47.05 (21.74) | Spa therapy (Sulphur bath treatments, 1/D)                                                                                                                                                                      | 22           | Usual care                                                                                                                  | 22           | VAS-QoL                           | 21D                      | +6.53 (-9.11-21.18)               | p=0.372                          | Adjusted for baseline                                                                                                                                                                                                                                                           |        | High              |      |
| Fatigue (VAS-fatigue)<br>Santos, 2016    | RCT          | 44                         | RA patients                                                                                                | NR                                   | DA528 4.73 (1.53)                                                                       | 1.42 (0.72)                                                                       | 48.07 (26.48) | 56.36 (28.70) | NR  | VAS-QoL 47.05 (21.74) | Spa therapy (Sulphur bath treatments, 1/D)                                                                                                                                                                      | 22           | Usual care                                                                                                                  | 22           | VAS-fatigue                       | 21D                      | +2.89 (-13.48-19.26)              | p=0.723                          | Adjusted for baseline                                                                                                                                                                                                                                                           |        | High              |      |
| Disease activity<br>Santos, 2016         | RCT          | 44                         | RA patients                                                                                                | NR                                   | DA528 4.73 (1.53)                                                                       | 1.42 (0.72)                                                                       | 48.07 (26.48) | 56.36 (28.70) | NR  | VAS-QoL 47.05 (21.74) | Spa therapy (Sulphur bath treatments, 1/D)                                                                                                                                                                      | 22           | Usual care                                                                                                                  | 22           | DAS28                             | 21D                      | +0.21 (-0.36-0.68)                | p=0.368                          | Adjusted for baseline                                                                                                                                                                                                                                                           |        | High              |      |
| Other<br>Santos, 2019                    | SLR (8 SLRs) | 6740                       | RA patients                                                                                                | NR                                   | NR                                                                                      | NR                                                                                | Nr            | NR            | NR  | NR                    | Hydrotherapy/balneotherapy                                                                                                                                                                                      | 491 (#1)     | Usual care/placebo/other non-pharmacological or non-surgical interventions                                                  | #8           | Global impact of disease          | NR                       |                                   |                                  | No effect or difference compared to a control treatment; Conclusions: Of the included interventions, only multicomponent or single exercise/physical activity interventions,psychosocial interventions and custom orthoses seem to reduce the impact of rheumatoid arthritis.   |        | Moderate Moderate |      |
| INTENSIFICATION OF PATIENT CARE          |              |                            |                                                                                                            |                                      |                                                                                         |                                                                                   |               |               |     |                       |                                                                                                                                                                                                                 |              |                                                                                                                             |              |                                   |                          |                                   |                                  |                                                                                                                                                                                                                                                                                 |        |                   |      |
| Function (HAQ)<br>de Thurah, 2018        | RCT          | 294                        | RA patients with disease duration >2Y                                                                      | DA528 2.07 (1-12Y, range of medians) | NR                                                                                      | NR                                                                                | NR            | NR            | NR  | NA                    | Patient-reported outcome based tele-health follow-up carried out by a nurse                                                                                                                                     | 88           | Conventional outpatient followup by physicians                                                                              | 94           | HAQ (ITT analysis)                | Change from BL until 52W | 0.05 (95%CI -0.02-0.12)           | 0.08 (95%CI -0.02-0.14)          | -0.03 (90%CI -0.13-0.06)                                                                                                                                                                                                                                                        | p=0.47 |                   | High |
|                                          |              |                            |                                                                                                            |                                      |                                                                                         |                                                                                   |               |               |     |                       | Patient-reported outcome based tele-health follow-up carried out by a rheumatologist                                                                                                                            | 93           | Conventional outpatient followup by physicians                                                                              | 94           | HAQ (ITT analysis)                | Change from BL until 52W | 0.03 (95%CI -0.03-0.09)           | 0.08 (95%CI -0.02-0.14)          | -0.05 (90%CI -0.14-0.04)                                                                                                                                                                                                                                                        | p=0.26 |                   | High |
| Hewlett, 2005                            | RCT          | 209                        | RA patients                                                                                                | NR                                   | 7.0-10.0Y, range of medians                                                             | 1.30                                                                              | 3.04          | NR            | NR  | NA                    | Direct access to hospital review (rheumatologist, physiotherapist, occupational therapist) by patients with RA through a nurse-led telephone helpline for 2Y                                                    | 68           | Usual care (review initiated by rheumatologists)                                                                            | 52           | HAQ (long-term follow-up)         | Change from BL until 6Y  | 0.19 (-0.125-0.73), median (IQR)  | 0.25 (0-0.75), median (IQR)      | p=0.39                                                                                                                                                                                                                                                                          |        | High              |      |
| Munoz-Fernandez, 2016                    | Non-RCT      | 393 (RA 302)               | All RA patients                                                                                            | 10.0Y                                | DA528 (RA 2-9)                                                                          | 0.8 (RA patients)                                                                 | NR            | NR            | 0.7 | NA                    | Nursing clinics in rheumatology                                                                                                                                                                                 | 181 (RA 142) | No nursing clinic                                                                                                           | 212 (RA 160) | HAQ (RA)                          | 12M                      | 0.7 (0.7)                         | 0.9 (0.7)                        | p=0.023                                                                                                                                                                                                                                                                         | 0.29   | High              |      |
| Tijhuis, 2002                            | RCT          | 210                        | RA patients with increasing difficulty in performing activities of daily living over the previous 6 weeks. | 1-9Y                                 | DA528 5.63 (Nurse specialist patients 1.17; Inpatients 1.49; Day patients 1.54; p<0.01) | 1.40 (Nurse specialist patients 1.17; Inpatients 1.49; Day patients 1.54; p<0.01) | NR            | NR            | NR  | NA                    | Clinical nurse specialist (clinical nurse specialist provided information about RA and prescribed, in consultation with the rheumatologist, joint splints, adaptive equipment, and house adaptations if needed) | 71           | Inpatient team care (9 treatment days within 2-3W, admitted to the hospital for 12 consecutive days, including the weekend) | 71           | HAQ                               | Change from BL until 6W  | 0.09 (-0.02, 0.20), mean (95% CI) | 0.19 (0.08, 0.29), mean (95% CI) | p<0.05, adjusted for age and difference at baseline                                                                                                                                                                                                                             |        | High              |      |
|                                          |              |                            |                                                                                                            |                                      |                                                                                         |                                                                                   |               |               |     |                       |                                                                                                                                                                                                                 |              | Day patient team care (9 treatment days, 3/W, from 10AM until 4PM with a fixed period of 1.5 hours of bed rest)             | 71           | HAQ                               | Change from BL until 6W  | 0.09 (-0.02, 0.20), mean (95% CI) | 0.27 (0.16, 0.37), mean (95% CI) | p<0.05, adjusted for age and difference at baseline                                                                                                                                                                                                                             |        | High              |      |
| Pain (VAS-pain)<br>Hewlett, 2005         | RCT          | 209                        | RA patients                                                                                                | 7.0-10.0Y, range of medians          | NR                                                                                      | 1.30                                                                              | 3.04          | NR            | NR  | NA                    | Direct access to hospital review (rheumatologist, physiotherapist, occupational therapist) by patients with RA through a nurse-led telephone helpline for 2Y                                                    | 68           | Usual care (review initiated by rheumatologists)                                                                            | 52           | VAS-pain (long-term follow-up)    | Change from BL until 6Y  | 1.25 (-0.40-3.25), median (IQR)   | 1.1 (-1.00-3.60), median (IQR)   | p=0.91                                                                                                                                                                                                                                                                          |        | High              |      |
| Wang, 2017                               | RCT          | 220                        | RA patients                                                                                                | 8.8Y                                 | DA528 4.37                                                                              | NR                                                                                | NR            | 43.14         | NR  | NA                    | Nurse-led care                                                                                                                                                                                                  | 110          | Rheumatologist-led care                                                                                                     | 110          | VAS-pain                          | 12M                      | 29.21                             | 26.03                            | p<0.001                                                                                                                                                                                                                                                                         |        | High              |      |
| QoL (EQ-5D)<br>de Thurah, 2018           | RCT          | 294                        | RA patients with disease duration >2Y                                                                      | DA528 2.07 (1-12Y, range of medians) | NR                                                                                      | NR                                                                                | NR            | NR            | NR  | NA                    | Patient-reported outcome based tele-health follow-up carried out by a nurse                                                                                                                                     | 88           | Conventional outpatient followup by physicians                                                                              | 94           | EQ-5D (ITT analysis)              | Change from BL until 52W | -0.02 (95%CI -0.06-0.03)          | -0.01 (95%CI -0.06-0.05)         | -0.01 (90%CI -0.09-0.05)                                                                                                                                                                                                                                                        | p=0.83 |                   | High |
|                                          |              |                            |                                                                                                            |                                      |                                                                                         |                                                                                   |               |               |     |                       | Patient-reported outcome based tele-health follow-up carried out by a rheumatologist                                                                                                                            | 93           | Conventional outpatient followup by physicians                                                                              | 94           | EQ-5D (ITT analysis)              | Change from BL until 52W | -0.02 (95%CI -0.07-0.04)          | -0.01 (95%CI -0.06-0.05)         | -0.01 (90%CI -0.09-0.07)                                                                                                                                                                                                                                                        | p=0.75 |                   | High |
| Hewlett, 2005                            | RCT          | 209                        | RA patients                                                                                                | NR                                   | 7.0-10.0Y, range of medians                                                             | 1.30                                                                              | 3.04          | NR            | NR  | NA                    | Direct access to hospital review (rheumatologist, physiotherapist, occupational therapist) by patients with RA through a nurse-led telephone helpline for 2Y                                                    | 68           | Usual care (review initiated by rheumatologists)                                                                            | 52           | QoL (SF-36) (long-term follow-up) | Change from BL until 6Y  |                                   |                                  | ns                                                                                                                                                                                                                                                                              |        | High              |      |
| Munoz-Fernandez, 2016                    | Non-RCT      | 393 (RA 302)               | All RA patients                                                                                            | 10.0Y                                | DA528 (RA 2-9)                                                                          | 0.8 (RA patients)                                                                 | NR            | NR            | 0.7 | NA                    | Nursing clinics in rheumatology                                                                                                                                                                                 | 181 (RA 142) | No nursing clinic                                                                                                           | 212 (RA 160) | EQ-5D tariff                      | 12M                      | 0.7 (0.2)                         | 0.7 (0.2)                        | p=0.069                                                                                                                                                                                                                                                                         | 0.0    | High              |      |
| Fatigue (VAS-fatigue)<br>de Thurah, 2017 | SLR: 7 RCT's | 548 (#5, only RA patients) | RA patients                                                                                                | NR                                   | NR                                                                                      | NR                                                                                | NR            | NR            | NR  | NA                    | Nurse-led follow-up in managing disease control                                                                                                                                                                 | 183          | Physician-led follow-up                                                                                                     | 182          | Fatigue                           | 1Y                       | -4.13 (-9.94-1.68)                |                                  | >0 favours physician led follow-up; Conclusion: After 1 year no difference in disease activity, indicated by DAS-28, were found between embedded nurse-led follow-up compared with conventional physician-led follow-up, in RA patients with low disease activity or remission. |        | Low Moderate      |      |
| Wang, 2017                               | RCT          | 220                        | RA patients                                                                                                | 8.8Y                                 | DA528 4.37                                                                              | NR                                                                                | NR            | 43.14         | NR  | NA                    | Nurse-led care                                                                                                                                                                                                  | 110          | Rheumatologist-led care                                                                                                     | 110          | VAS-fatigue                       | 12M                      | 49.41                             | 44.03                            | p<0.001                                                                                                                                                                                                                                                                         |        | High              |      |
| Disease activity                         |              |                            |                                                                                                            |                                      |                                                                                         |                                                                                   |               |               |     |                       |                                                                                                                                                                                                                 |              |                                                                                                                             |              |                                   |                          |                                   |                                  |                                                                                                                                                                                                                                                                                 |        |                   |      |

|                                                    |               |                            |                                       |                                                                     |                          |                   |    |       |     |    |                                                                                                                   |                                                                                                                   |                                                |                                                                                                   |                                 |                                                                             |                                    |                                                                                                                                                                                                                                                                                                                                                                                                                                                                                                                                                    |                                                                |              |      |                                                                                                                                                                                                                                                                                                                                                          |                                                                                                                                                                                                                                                                                                                                                |              |              |
|----------------------------------------------------|---------------|----------------------------|---------------------------------------|---------------------------------------------------------------------|--------------------------|-------------------|----|-------|-----|----|-------------------------------------------------------------------------------------------------------------------|-------------------------------------------------------------------------------------------------------------------|------------------------------------------------|---------------------------------------------------------------------------------------------------|---------------------------------|-----------------------------------------------------------------------------|------------------------------------|----------------------------------------------------------------------------------------------------------------------------------------------------------------------------------------------------------------------------------------------------------------------------------------------------------------------------------------------------------------------------------------------------------------------------------------------------------------------------------------------------------------------------------------------------|----------------------------------------------------------------|--------------|------|----------------------------------------------------------------------------------------------------------------------------------------------------------------------------------------------------------------------------------------------------------------------------------------------------------------------------------------------------------|------------------------------------------------------------------------------------------------------------------------------------------------------------------------------------------------------------------------------------------------------------------------------------------------------------------------------------------------|--------------|--------------|
| de Thurah, 2017                                    | SLR: 7 RCTs   | 548 (85, only RA patients) | RA patients                           | NR                                                                  | NR                       | NR                | NR | NR    | NR  | NA | Nurse-led follow-up in managing disease control                                                                   | 263                                                                                                               | Physician-led follow-up                        | 271                                                                                               | Disease activity                | 1Y                                                                          | -0.07 (-0.23-0.09)                 | >0 favours physician-led follow-up; Conclusion: After 1 year no difference in disease activity, indicated by DAS-28, were found between embedded nurse-led follow-up compared with conventional physician-led follow-up, in RA patients with low disease activity or remission. No difference was found in patient satisfaction after 1 year (standard mean difference (SMD) -0.17 (95 % CI -1.0 to 0.67), whereas a statistical significant difference in favour of nurse-led follow-up was seen after 2 years (SMD: 0.6 (95% CI -0.00 to 1.20)). | Low                                                            | Moderate     |      |                                                                                                                                                                                                                                                                                                                                                          |                                                                                                                                                                                                                                                                                                                                                |              |              |
| de Thurah, 2018                                    | RCT           | 294                        | RA patients with disease duration >2Y | DAS28 2.07                                                          | 11-12Y, range of medians | NR                | NR | NR    | NR  | NA | Patient-reported outcome based tele-health follow-up carried out by a nurse                                       | 88                                                                                                                | Conventional outpatient followup by physicians | 94                                                                                                | DAS28 (ITT analysis)            | Change from BL until 52W                                                    | -0.26 (95%CI -0.44--0.07)          | -0.06 (95%CI -0.23-0.12)                                                                                                                                                                                                                                                                                                                                                                                                                                                                                                                           | -0.19 (95%CI -0.41-0.02)                                       | p=0.15       |      |                                                                                                                                                                                                                                                                                                                                                          |                                                                                                                                                                                                                                                                                                                                                |              |              |
|                                                    |               |                            |                                       |                                                                     |                          |                   |    |       |     |    | Patient-reported outcome based tele-health follow-up carried out by a rheumatologist                              | 93                                                                                                                | Conventional outpatient followup by physicians | 94                                                                                                | DAS28 (ITT analysis)            | Change from BL until 52W                                                    | -0.16 (95%CI -0.33-0.03)           | -0.06 (95%CI -0.23-0.12)                                                                                                                                                                                                                                                                                                                                                                                                                                                                                                                           | -0.10 (95%CI -0.30-0.13)                                       | p=0.45       |      |                                                                                                                                                                                                                                                                                                                                                          |                                                                                                                                                                                                                                                                                                                                                |              |              |
| Munoz-Fernandez, 2016                              | Non-RCT       | 393 (RA 302)               | All RA patients                       | 10.0Y                                                               | DAS28 (RA) 2.9           | 0.8 (RA patients) | NR | NR    | 0.7 | NA | Nursing clinics in rheumatology                                                                                   | 181 (RA 142)                                                                                                      | No nursing clinic                              | 212 (RA 160)                                                                                      | DAS28 (RA)                      | 12M                                                                         | 2.7 (1.1)                          | 2.8 (1.1)                                                                                                                                                                                                                                                                                                                                                                                                                                                                                                                                          |                                                                | p=0.274      | 0.09 | High                                                                                                                                                                                                                                                                                                                                                     |                                                                                                                                                                                                                                                                                                                                                |              |              |
| Wang, 2017                                         | RCT           | 220                        | RA patients                           | 8.8Y                                                                | DAS28 4.37               | NR                | NR | 43.14 | NR  | NA | Nurse-led care                                                                                                    | 110                                                                                                               | Rheumatologist-led care                        | 110                                                                                               | DAS28                           | 12M                                                                         | 1.02 (1.32)                        | 0.98 (1.06)                                                                                                                                                                                                                                                                                                                                                                                                                                                                                                                                        |                                                                | p<0.001      | 0.03 | High                                                                                                                                                                                                                                                                                                                                                     |                                                                                                                                                                                                                                                                                                                                                |              |              |
| PHARMACOLOGICAL Function (HAQ)                     |               |                            |                                       |                                                                     |                          |                   |    |       |     |    |                                                                                                                   |                                                                                                                   |                                                |                                                                                                   |                                 |                                                                             |                                    |                                                                                                                                                                                                                                                                                                                                                                                                                                                                                                                                                    |                                                                |              |      |                                                                                                                                                                                                                                                                                                                                                          |                                                                                                                                                                                                                                                                                                                                                |              |              |
| Whittle, 2011                                      | SLR: RCTs 11  | 623                        | RA patients with pain                 | NR                                                                  | NR                       | NR                | NR | NR    | NR  | NA | Opioids                                                                                                           | 243 (2 studies)                                                                                                   | Placebo                                        |                                                                                                   | Functional status (HAQ)         |                                                                             | 0.1 lower (0.33 lower-0.13 higher) |                                                                                                                                                                                                                                                                                                                                                                                                                                                                                                                                                    |                                                                |              |      | There is limited evidence that weak oral opioids may be effective analgesics for some patients with RA, but adverse effects are common and may offset the benefits of this class of medications. There is insufficient evidence to draw conclusions regarding the use of weak opioids for longer than six weeks, or the role of strong opioids           | Low                                                                                                                                                                                                                                                                                                                                            | High         |              |
| Pain (VAS pain)                                    | Kawai, 2010   | RCT                        | 676                                   | RA patients with systemic disease control but persistent wrist pain | NR                       | NR                | NR | NR    | NR  | NR | Wrist joint pain (VAS Ketoprofen patch (20mg/0.50%, cutaneous) score 0-100): 50.0;                                | 338                                                                                                               | Placebo                                        | 338                                                                                               | VAS-pain of the wrist           | Change from BL until 2W                                                     | 15.7 (16.0)                        | 13.2 (16.4)                                                                                                                                                                                                                                                                                                                                                                                                                                                                                                                                        |                                                                | p=0.026      | 0.15 |                                                                                                                                                                                                                                                                                                                                                          |                                                                                                                                                                                                                                                                                                                                                |              |              |
| Lee, 2016                                          |               |                            |                                       |                                                                     |                          |                   |    |       |     |    | Pain intensity (BPI short form) 6.0                                                                               |                                                                                                                   |                                                |                                                                                                   |                                 |                                                                             |                                    |                                                                                                                                                                                                                                                                                                                                                                                                                                                                                                                                                    |                                                                |              |      |                                                                                                                                                                                                                                                                                                                                                          |                                                                                                                                                                                                                                                                                                                                                |              |              |
|                                                    |               |                            |                                       |                                                                     | 11.4Y                    | DAS28-CRP 3.28    | NR | NR    | NR  | NR | Pain intensity (BPI short form) 6.0                                                                               | 41                                                                                                                | Placebo (cross-over after 3W wash-out period)  | 41                                                                                                | Pain intensity (BPI short form) | Change from BL until 6W                                                     |                                    | -0.39 (-1.27-0.49)                                                                                                                                                                                                                                                                                                                                                                                                                                                                                                                                 | p=0.37; Adjusted by treatment group, study period and sequence |              |      | Moderate                                                                                                                                                                                                                                                                                                                                                 |                                                                                                                                                                                                                                                                                                                                                |              |              |
| Fidahi, 2017                                       | SLR: RCTs 8   | 3988                       | RA patients                           | 9.2Y                                                                | NR                       | NR                | NR | NR    | NR  | NA | Celecoxib                                                                                                         | 873 (2 studies)                                                                                                   | Placebo                                        |                                                                                                   | VAS-pain                        | Improvement from BL until 12W                                               |                                    | 11% (-8-14)                                                                                                                                                                                                                                                                                                                                                                                                                                                                                                                                        |                                                                |              |      | Celecoxib may improve clinical symptoms, alleviate pain and contribute to little or no difference in physical function compared to placebo. Celecoxib may slightly improve clinical symptoms compared with NSAIDs; results for reduced pain and improved physical function were uncertain.                                                               | Low                                                                                                                                                                                                                                                                                                                                            | Low-Moderate |              |
| Fitzcharles, 2016                                  | SLR: RCTs 4   | 201 (RA 58)                | Patients with RA, OA or fibromyalgia  | NR                                                                  | NR                       | NR                | NR | NR    | NR  | NA | Cannabinoids (nabiximols, nabilone 0.5-1mg, or PF-04457845 (irreversible fatty acid amide hydrolase-1 inhibitor)) | NR                                                                                                                | Placebo, amitriptyline or naproxen             | NR                                                                                                | Pain                            | 2-8W                                                                        |                                    |                                                                                                                                                                                                                                                                                                                                                                                                                                                                                                                                                    | Improved in 2 studies                                          |              |      | Pain relief and effect on sleep may have some potential therapeutic benefit, but with considerable mild to moderate adverse events. There is currently insufficient evidence to recommend cannabinoid treatment.                                                                                                                                         | Moderate                                                                                                                                                                                                                                                                                                                                       | High         |              |
| Richards, 2011                                     | SLR: RCTs 8   | 652                        | RA patients                           | NR                                                                  | NR                       | NR                | NR | NR    | NR  | NA | Tricyclic antidepressant                                                                                          | 30 (1 study)                                                                                                      | Control                                        |                                                                                                   | VAS-pain                        | <1W                                                                         | 10 higher (worse)                  | 34                                                                                                                                                                                                                                                                                                                                                                                                                                                                                                                                                 | No effect                                                      |              |      | There is currently insufficient evidence to support the routine prescription of antidepressants as analgesics in patients with RA as no reliable conclusions about their efficacy can be drawn from eight placebo RCTs. The use of these agents may be associated with adverse events which are generally mild and do not lead to cessation of treatment | Low                                                                                                                                                                                                                                                                                                                                            | High         |              |
|                                                    |               |                            |                                       |                                                                     |                          |                   |    |       |     |    |                                                                                                                   | 482 (7 studies)                                                                                                   |                                                |                                                                                                   | VAS-pain                        | 1-6W                                                                        |                                    |                                                                                                                                                                                                                                                                                                                                                                                                                                                                                                                                                    | Conflicting results                                            |              |      |                                                                                                                                                                                                                                                                                                                                                          |                                                                                                                                                                                                                                                                                                                                                |              |              |
|                                                    |               |                            |                                       |                                                                     |                          |                   |    |       |     |    |                                                                                                                   | 368 (5 studies)                                                                                                   |                                                |                                                                                                   | VAS-pain                        | >6W                                                                         |                                    |                                                                                                                                                                                                                                                                                                                                                                                                                                                                                                                                                    | Conflicting results                                            |              |      |                                                                                                                                                                                                                                                                                                                                                          |                                                                                                                                                                                                                                                                                                                                                |              |              |
| Whittle, 2011                                      | SLR: RCTs 11  | 623                        | RA patients with pain                 | NR                                                                  | NR                       | NR                | NR | NR    | NR  | NA | Codine (30mg) with paracetamol (500mg)                                                                            | 60 (1 study)                                                                                                      | Diclofenac (50mg)                              |                                                                                                   | VAS-pain                        |                                                                             |                                    |                                                                                                                                                                                                                                                                                                                                                                                                                                                                                                                                                    | ns                                                             |              |      | There is limited evidence that weak oral opioids may be effective analgesics for some patients with RA, but adverse effects are common and may offset the benefits of this class of medications. There is insufficient evidence to draw conclusions regarding the use of weak opioids for longer than six weeks, or the role of strong opioids           | Low                                                                                                                                                                                                                                                                                                                                            | High         |              |
| QoL (EQ-5D)                                        | Fidahi, 2017  | SLR: RCTs 8                | 3988                                  | RA patients                                                         | 9.2Y                     | NR                | NR | NR    | NR  | NR | NA                                                                                                                | Celecoxib                                                                                                         | 873 (2 studies)                                | Placebo                                                                                           |                                 | HAQ                                                                         | Improvement from BL until 12W      |                                                                                                                                                                                                                                                                                                                                                                                                                                                                                                                                                    | -0.10 (-0.29-0.1)                                              |              |      |                                                                                                                                                                                                                                                                                                                                                          | Celecoxib may improve clinical symptoms, alleviate pain and contribute to little or no difference in physical function compared to placebo. Celecoxib may slightly improve clinical symptoms compared with NSAIDs; results for reduced pain and improved physical function were uncertain.                                                     | Low          | Low-Moderate |
| Fitzcharles, 2016                                  |               |                            |                                       |                                                                     |                          |                   |    |       |     |    |                                                                                                                   |                                                                                                                   |                                                |                                                                                                   |                                 |                                                                             |                                    |                                                                                                                                                                                                                                                                                                                                                                                                                                                                                                                                                    |                                                                |              |      |                                                                                                                                                                                                                                                                                                                                                          |                                                                                                                                                                                                                                                                                                                                                |              |              |
|                                                    |               |                            |                                       |                                                                     | NR                       | NR                | NR | NR    | NR  | NR | NA                                                                                                                | Cannabinoids (nabiximols, nabilone 0.5-1mg, or PF-04457845 (irreversible fatty acid amide hydrolase-1 inhibitor)) | NR                                             | Placebo, amitriptyline or naproxen                                                                | NR                              | QoL                                                                         | 2-8W                               |                                                                                                                                                                                                                                                                                                                                                                                                                                                                                                                                                    | Improved in 1 study                                            |              |      | Pain relief and effect on sleep may have some potential therapeutic benefit, but with considerable mild to moderate adverse events. There is currently insufficient evidence to recommend cannabinoid treatment.                                                                                                                                         | Moderate                                                                                                                                                                                                                                                                                                                                       | High         |              |
| Disease activity                                   | Fidahi, 2017  | SLR: RCTs 8                | 3988                                  | RA patients                                                         | 9.2Y                     | NR                | NR | NR    | NR  | NR | NA                                                                                                                | Celecoxib                                                                                                         | 873 (2 studies)                                | Placebo                                                                                           |                                 | ACR20 response                                                              | 4-12W                              | 1.53 (1.25-1.86, -)                                                                                                                                                                                                                                                                                                                                                                                                                                                                                                                                | 15% (-7-25)                                                    |              |      |                                                                                                                                                                                                                                                                                                                                                          | Celecoxib may improve clinical symptoms, alleviate pain and contribute to little or no difference in physical function compared to placebo. Celecoxib may slightly improve clinical symptoms compared with NSAIDs; results for reduced pain and improved physical function were uncertain.                                                     | Low          | Low-Moderate |
|                                                    |               |                            |                                       |                                                                     |                          |                   |    |       |     |    |                                                                                                                   |                                                                                                                   |                                                |                                                                                                   |                                 |                                                                             |                                    |                                                                                                                                                                                                                                                                                                                                                                                                                                                                                                                                                    |                                                                |              |      |                                                                                                                                                                                                                                                                                                                                                          |                                                                                                                                                                                                                                                                                                                                                |              |              |
|                                                    |               |                            |                                       |                                                                     |                          |                   |    |       |     |    |                                                                                                                   | Celecoxib                                                                                                         | 2930 (7 studies)                               | NSAIDs (amblosetrin guacyl, diclofenac, ibuprofen, meloxicam, nabumetone, naproxen, pelubiprofen) |                                 | ACR20 response                                                              |                                    | 1.10 (0.99-1.23)                                                                                                                                                                                                                                                                                                                                                                                                                                                                                                                                   | 4% (0-8)                                                       |              |      |                                                                                                                                                                                                                                                                                                                                                          |                                                                                                                                                                                                                                                                                                                                                |              |              |
| Other                                              | Whittle, 2011 | SLR: RCTs 11               | 623                                   | RA patients with pain                                               | NR                       | NR                | NR | NR    | NR  | NR | NA                                                                                                                | Opioids                                                                                                           | 324 (3 studies)                                | Placebo                                                                                           |                                 | Patient reported global impression of clinical change 'good' or 'very good' | 573/1000                           | 398/1000                                                                                                                                                                                                                                                                                                                                                                                                                                                                                                                                           | 1.44 (1.03-2.03, -)                                            | 18 (1-18, -) |      |                                                                                                                                                                                                                                                                                                                                                          | There is limited evidence that weak oral opioids may be effective analgesics for some patients with RA, but adverse effects are common and may offset the benefits of this class of medications. There is insufficient evidence to draw conclusions regarding the use of weak opioids for longer than six weeks, or the role of strong opioids | Low          | High         |
|                                                    |               |                            |                                       |                                                                     |                          |                   |    |       |     |    |                                                                                                                   |                                                                                                                   |                                                |                                                                                                   |                                 |                                                                             |                                    |                                                                                                                                                                                                                                                                                                                                                                                                                                                                                                                                                    |                                                                |              |      |                                                                                                                                                                                                                                                                                                                                                          |                                                                                                                                                                                                                                                                                                                                                |              |              |
| OTHER INTERVENTIONS Custom or those Function (HAQ) |               |                            |                                       |                                                                     |                          |                   |    |       |     |    |                                                                                                                   |                                                                                                                   |                                                |                                                                                                   |                                 |                                                                             |                                    |                                                                                                                                                                                                                                                                                                                                                                                                                                                                                                                                                    |                                                                |              |      |                                                                                                                                                                                                                                                                                                                                                          |                                                                                                                                                                                                                                                                                                                                                |              |              |

|                                                                                                                     |  |              |      |             |             |    |    |    |    |    |    |                                                                                                                                                                                                                                               |                                  |                                                                            |    |                       |                                                          |                                                                                                                                                                                                                                                                                                                         |          |               |
|---------------------------------------------------------------------------------------------------------------------|--|--------------|------|-------------|-------------|----|----|----|----|----|----|-----------------------------------------------------------------------------------------------------------------------------------------------------------------------------------------------------------------------------------------------|----------------------------------|----------------------------------------------------------------------------|----|-----------------------|----------------------------------------------------------|-------------------------------------------------------------------------------------------------------------------------------------------------------------------------------------------------------------------------------------------------------------------------------------------------------------------------|----------|---------------|
| Santos, 2019                                                                                                        |  | SLR (8 SLRs) | 6740 | RA patients | NR          | NR | NR | Nr | NR | NR | NR | Custom orthoses                                                                                                                                                                                                                               | 340 (#1)                         | Usual care/placebo/other non-pharmacological or non-surgical interventions | #8 | Pain                  | NR                                                       | Effective improvement with moderate positive effects; Conclusions: Of the included interventions, only multicomponent or single exercise/physical activity interventions,psychosocial interventions and custom orthoses seem to reduce the impact of rheumatoid arthritis.                                              | Moderate | Moderate      |
| <u>Pain (VAS -pain)</u>                                                                                             |  |              |      |             |             |    |    |    |    |    |    |                                                                                                                                                                                                                                               |                                  |                                                                            |    |                       |                                                          |                                                                                                                                                                                                                                                                                                                         |          |               |
| Santos, 2019                                                                                                        |  | SLR (8 SLRs) | 6740 | RA patients | NR          | NR | NR | Nr | NR | NR | NR | Custom orthoses                                                                                                                                                                                                                               | 220 (#1)                         | Usual care/placebo/other non-pharmacological or non-surgical interventions | #8 | Functional disability | NR                                                       | Effective improvement with small positive effects; Conclusions: Of the included interventions, only multicomponent or single exercise/physical activity interventions,psychosocial interventions and custom orthoses seem to reduce the impact of rheumatoid arthritis.                                                 | Moderate | Moderate      |
| Other interventions vs alternative intervention or placebo                                                          |  |              |      |             |             |    |    |    |    |    |    |                                                                                                                                                                                                                                               |                                  |                                                                            |    |                       |                                                          |                                                                                                                                                                                                                                                                                                                         |          |               |
| <u>Function (HAG)</u>                                                                                               |  |              |      |             |             |    |    |    |    |    |    |                                                                                                                                                                                                                                               |                                  |                                                                            |    |                       |                                                          |                                                                                                                                                                                                                                                                                                                         |          |               |
| Christie, 2007                                                                                                      |  | SLR: SLRs    | 28   | NR          | RA patients | NR | NR | NR | NR | NR | NA | Low-level laser therapy                                                                                                                                                                                                                       | Alternative intervention/placebo |                                                                            |    | Pain and function     | Reduces pain and improves function, low quality evidence | High-quality evidence was found for beneficial effects of joint protection and patient education, moderate-quality evidence was found for beneficial effects of herbal therapy (gamma-linolenic acid) and low-level laser therapy, and low-quality evidence was found for the effectiveness of the other interventions. | Low      | Moderate-High |
|                                                                                                                     |  |              |      |             |             |    |    |    |    |    |    | Therapeutic ultrasound                                                                                                                                                                                                                        | Placebo/alternative intervention |                                                                            |    | Pain and function     | Reduces pain and improves function, low quality evidence |                                                                                                                                                                                                                                                                                                                         |          |               |
| <u>Pain (VAS -pain)</u>                                                                                             |  |              |      |             |             |    |    |    |    |    |    |                                                                                                                                                                                                                                               |                                  |                                                                            |    |                       |                                                          |                                                                                                                                                                                                                                                                                                                         |          |               |
| Christie, 2007                                                                                                      |  | SLR: SLRs    | 28   | NR          | RA patients | NR | NR | NR | NR | NR | NA | Low-level laser therapy                                                                                                                                                                                                                       | Alternative intervention/placebo |                                                                            |    | Pain and function     | Reduces pain and improves function, low quality evidence | High-quality evidence was found for beneficial effects of joint protection and patient education, moderate-quality evidence was found for beneficial effects of herbal therapy (gamma-linolenic acid) and low-level laser therapy, and low-quality evidence was found for the effectiveness of the other interventions. | Low      | Moderate-High |
|                                                                                                                     |  |              |      |             |             |    |    |    |    |    |    | Therapeutic ultrasound                                                                                                                                                                                                                        | Alternative intervention/placebo |                                                                            |    | Pain and function     | Reduces pain and improves function, low quality evidence |                                                                                                                                                                                                                                                                                                                         |          |               |
| Electrical stimulation, hand/foot orthosis, thermotherapy or transcutaneous electrical nerve stimulation vs control |  |              |      |             |             |    |    |    |    |    |    |                                                                                                                                                                                                                                               |                                  |                                                                            |    |                       |                                                          |                                                                                                                                                                                                                                                                                                                         |          |               |
| <u>Other</u>                                                                                                        |  |              |      |             |             |    |    |    |    |    |    |                                                                                                                                                                                                                                               |                                  |                                                                            |    |                       |                                                          |                                                                                                                                                                                                                                                                                                                         |          |               |
| Christie, 2007                                                                                                      |  | SLR: SLRs    | 28   | NR          | RA patients | NR | NR | NR | NR | NR | NA | Other interventions: Acupuncture, balneotherapy, electrical stimulation, occupational therapy (besides joint protection and comprehensive occupation therapy), hand/foot orthosis, thermotherapy, transcutaneous electrical nerve stimulation | All types of controls            |                                                                            |    | Efficacy              | Moderate effect and low quality evidence                 | High-quality evidence was found for beneficial effects of joint protection and patient education, moderate-quality evidence was found for beneficial effects of herbal therapy (gamma-linolenic acid) and low-level laser therapy, and low-quality evidence was found for the effectiveness of the other interventions. | Low      | Moderate-High |

ACR: American College of Rheumatology; ANOVA: analysis of variance; BDI: Beck Depression Inventory (scale 0-63, higher scores reflect higher levels of depression); BL: baseline; BPi: Brief Pain Inventory (scale 0-10); BRFAT-NRS: Bristol Rheumatoid Arthritis Fatigue Numerical Rating Scale (score 0-10, higher scores reflect higher level of symptoms); CBT: cognitive behavioral therapy; CIS: Checklist Individual Strengths (scale 0-56, higher score reflects higher level of fatigue); CI: confidence interval; D: days(s); DAS28: disease activity score assessing 28 joints; EQ-5D: Euro Quality of Life using 5 dimensions; FACIT-F: Functional Assessment of Chronic Illness Therapy-Fatigue; FSS: Fatigue Severity Scale (scale 0-7); HGA: Impact of Rheumatic Diseases on General Health and Lifestyle questionnaire (negative mood scale 0-30, anxiety scale 0-40, pain scale 0-24, higher scores reflect higher levels of symptoms); HAG: health assessment questionnaire; LSG: Leeds Satisfaction Questionnaire (scale 1-5, higher scores reflect higher levels of disagreement); mC: milligram; mg: milligram; MHQ: Michigan Hand outcome Questionnaire (0-100, higher scores reflect better function); n: number; NA: not applicable; nM: muscular strength assessment; NR: not reported; (n-JRCT: (non-)randomised controlled trial; ns: not significant; NSAIDs: non-steroid anti-inflammatory drug; OA: osteoarthritis; OR: odds ratio; QoL: Quality of Life; RA: rheumatoid arthritis; RAID: Rheumatoid Arthritis Impact of Disease (scale 0-10, higher scores reflect worse disease); VAS: visual analogue scale; SD: standard deviation; SF-36: short form general health questionnaire using 36 items; SLR: systematic literature review; SMD: standardized mean difference; WIS: Work Instability Scale; W: week(s); Y: year(s); \*: abstract; #: number of studies.

1. Latest time point during treatment period that was reported; 2. According to Cochrane Collaboration's tool for individual studies: Highest risk of bias as found; According to AMSTAR2 tool for SLRs: Low-zero or one non-critical weaknesses; Moderate-more than one non-critical weaknesses; High-one critical flaw with or without non-critical weaknesses; Critically High-more than one critical flaw with or without non-critical weaknesses; 3. Only applicable for SLRs: Summary of RoB of individual studies, as assessed in SLR
