# Supplementary material for: Pharmacological and non-pharmacological therapeutic strategies in difficult-to-treat rheumatoid arthritis: a systematic literature review informing the EULAR recommendations for the management of difficult-to-treat rheumatoid arthritis
Source: HighWire-hosted journal article supplement (doi:10.1136/rmdopen-2020-001512), 2021-01-01
Supplement: rmdopen-2020-001512supp004_data_supplement.pdf [file rmdopen-2020-001512supp004_data_supplement.pdf]

Supplementary table 4. Summary of studies on the identification of a mismatch in goal setting between patients and health care professionals

| 1st Author, publication year | Study design                       | Study population (n)                   | Disease activity in RA patients | Disease duration of RA (mean) | Comparison of goals between groups<br>Description of treatment goal                                                                                                                                                                                                                                                                                                                                                                                                                                                                                                                                                                                                                          | Group 1                                      | Frequency in group 1                                                             | Group 2                                      | Frequency in group 2                                                             | Other                                                                                                                                                                                                                                                                                                                                                                                                                                                                                                                                                                                  | Risk of bias <sup>*1</sup> | Concerns regarding applicability*2 |
|------------------------------|------------------------------------|----------------------------------------|---------------------------------|-------------------------------|----------------------------------------------------------------------------------------------------------------------------------------------------------------------------------------------------------------------------------------------------------------------------------------------------------------------------------------------------------------------------------------------------------------------------------------------------------------------------------------------------------------------------------------------------------------------------------------------------------------------------------------------------------------------------------------------|----------------------------------------------|----------------------------------------------------------------------------------|----------------------------------------------|----------------------------------------------------------------------------------|----------------------------------------------------------------------------------------------------------------------------------------------------------------------------------------------------------------------------------------------------------------------------------------------------------------------------------------------------------------------------------------------------------------------------------------------------------------------------------------------------------------------------------------------------------------------------------------|----------------------------|------------------------------------|
| Barton, 2018                 | Cross-sectional: Qualitative study | RA patients (19) + clinicians (18)     | NR                              | NR                            | RA knowledge                                                                                                                                                                                                                                                                                                                                                                                                                                                                                                                                                                                                                                                                                 | RA patients                                  |                                                                                  | Clinicians                                   |                                                                                  | Shared goal, although clinicians may utilize transfer of knowledge efforts to impose clinician- or guideline-oriented goals (e.g., reduce inflammation, stall disease progression) without broader consideration of patient preferences. Patients' desires for information on a range of RA topics is important, but the value attached to that knowledge is where patients and clinicians diverge. Patients expressed a desire for clinicians to look beyond clinical markers and consider patients' quality-of-life goals as well as being open to multiple treatment possibilities. | NA                         | H/L/L                              |
| Gibofsky, 2018               | Cross-sectional                    | RA patients (1805) + physicians (1736) | NR                              | 7Y                            | Reduce pain<br>Reducing further joint damage<br>Increased comfort in conducting daily activities<br>Reduce joint swelling or inflammation<br>Reduce fatigue<br>Reduce morning stiffness<br>Learning to better live with disease<br>Increase level of physical activity<br>Put RA into remission<br>Prevent disability<br>Improvements in lab work/blood test results<br>Show a lack of disease progression in X-rays, MRI scan or ultrasound<br><br>Simplify treatment plan to a single therapy or medication<br>See more/other physicians to help RA management<br>Able to return to work<br>Switch from injections/infusions to oral medications<br>Switch to self-administered injections | RA patients                                  | 67%<br>53%<br>52%<br>50%<br>46%<br>42%<br>41%<br>40%<br>40%<br>39%<br>25%<br>22% | Physicians                                   | 88%<br>67%<br>79%<br>74%<br>62%<br>60%<br>45%<br>63%<br>69%<br>71%<br>40%<br>41% | L/L/L/H                                                                                                                                                                                                                                                                                                                                                                                                                                                                                                                                                                                | H/L/L                      |                                    |
| Torikai, 2018 <sup>^</sup>   | Cross-sectional                    | RA patients (289)                      | NR                              | 4.7Y                          | Pain improvement<br>Improvement in pain<br>Doing work without difficulty<br>Doing housework easily<br>Improvement of emotional depression<br>Improvement of fatigue<br>Improvement of arthritis<br>Improvement of morning stiffness                                                                                                                                                                                                                                                                                                                                                                                                                                                          | Patients with high/moderate disease activity |                                                                                  | Patients with low disease activity/remission |                                                                                  | Most important treatment goal in both groups<br>No significant difference between groups<br>Significantly more frequently in patients with moderate/high disease activity (p<0.05)<br>Significantly more frequently in patients with low disease activity/remission (p<0.05)                                                                                                                           | L/U/H/L                    | H/H/H                              |

H: high; L: low; M: months; n: number of patients; NA: not applicable; NR: not reported; ns: not significant; RA: rheumatoid arthritis; SLR: systematic literature review; U: uncertain; W: weeks; Y: years; ^: Conference abstract; #: number of studies. ^: Conference abstract; 1. Risk of Bias according to QUADAS-2 for individual studies: Patient selection/Index test/Reference standard/Flow and timing; 2. Concerns regarding applicability for individual studies: Patient selection/Index test/Reference standard
