# Supplementary material for: Pharmacological and non-pharmacological therapeutic strategies in difficult-to-treat rheumatoid arthritis: a systematic literature review informing the EULAR recommendations for the management of difficult-to-treat rheumatoid arthritis
Source: HighWire-hosted journal article supplement (doi:10.1136/rmdopen-2020-001512), 2021-01-01
Supplement: rmdopen-2020-001512supp005_data_supplement.pdf [file rmdopen-2020-001512supp005_data_supplement.pdf]

Supplementary table 5. Summary of studies on the optimisation of a mismatch in goal setting between patients and health care professionals

| 1st Author, publication year                                                                                                                                                                                                     | Study design            | Patients (total n)                                                               | Disease activity at baseline (mean [SD]) | Disease duration of RA (mean) | Outcomes regarding goal setting at baseline (mean [SD])                                                                                                                                                                                                                                                                                                                                                                                                                                                                                                                                                                                                                                                                                                                                                                             | Intervention group Description                                                                                                                                                                                                                                                                                                                                                                                                                                                                                                                                                                                                                                                                        | n   | Comparator Description                                                                                                                        | n  | Outcome Description*1                                                                                                                                                                                                           | Time point*2            | Mean outcome in intervention group (SD) | Mean outcome in control group (SD) | Mean difference (standard error, 95% CI) | p-value                                                                                                                                                                                                                                                                                                                                                                                                                                                                                                                                                                                                                                                                                                                                                                                                                           | Other                                                                                                                                                                                        | Risk of bias*3 |    |    |                                                                                                                                                                                                                                              |                         |                           |  |  |         |                                          |      |
|----------------------------------------------------------------------------------------------------------------------------------------------------------------------------------------------------------------------------------|-------------------------|----------------------------------------------------------------------------------|------------------------------------------|-------------------------------|-------------------------------------------------------------------------------------------------------------------------------------------------------------------------------------------------------------------------------------------------------------------------------------------------------------------------------------------------------------------------------------------------------------------------------------------------------------------------------------------------------------------------------------------------------------------------------------------------------------------------------------------------------------------------------------------------------------------------------------------------------------------------------------------------------------------------------------|-------------------------------------------------------------------------------------------------------------------------------------------------------------------------------------------------------------------------------------------------------------------------------------------------------------------------------------------------------------------------------------------------------------------------------------------------------------------------------------------------------------------------------------------------------------------------------------------------------------------------------------------------------------------------------------------------------|-----|-----------------------------------------------------------------------------------------------------------------------------------------------|----|---------------------------------------------------------------------------------------------------------------------------------------------------------------------------------------------------------------------------------|-------------------------|-----------------------------------------|------------------------------------|------------------------------------------|-----------------------------------------------------------------------------------------------------------------------------------------------------------------------------------------------------------------------------------------------------------------------------------------------------------------------------------------------------------------------------------------------------------------------------------------------------------------------------------------------------------------------------------------------------------------------------------------------------------------------------------------------------------------------------------------------------------------------------------------------------------------------------------------------------------------------------------|----------------------------------------------------------------------------------------------------------------------------------------------------------------------------------------------|----------------|----|----|----------------------------------------------------------------------------------------------------------------------------------------------------------------------------------------------------------------------------------------------|-------------------------|---------------------------|--|--|---------|------------------------------------------|------|
| Fraenkel, 2012                                                                                                                                                                                                                   | rRCT                    | RA patients (104)                                                                | NR                                       | 8Y, median                    | Objective knowledge (according to self-developed questionnaire, range 1-20, higher score reflects more knowledge): 15.7; Subjective/perceived knowledge (according to subscale of Decisional conflict scale, range 0-100, higher scores reflect lower subjective knowledge): 74.7; Values clarity (according to subscale of Decisional conflict scale, range 0-100, higher scores reflect lower values clarity): 68.2; Willingness to try a bDMARD (according to numerous rating scale, range 0-10, higher scores reflect higher willingness): 6.1                                                                                                                                                                                                                                                                                  | Web-based tool: The tool is an interactive, web-based, computerized educational module with voiceovers that subjects navigate through using a menu bar. Information is provided for all tumor necrosis factor inhibitors, abatacept, rituximab, and tocilizumab. To promote accurate gist representations, the tool begins with an educational segment describing the natural history of RA and why biologics are frequently recommended for patients with persistent disease activity despite the use of traditional DMARDs. The introduction's objective is to ensure that subjects have accurate illness perceptions regarding the consequences of chronic inflammation and the role of biologics. | 104 | NA                                                                                                                                            | NA | Objective knowledge (according to self-developed questionnaire, range 1-20, higher score reflects more knowledge)                                                                                                               | End of study visit      | 18.0 (1.9)                              |                                    |                                          | p<0.0001 (between pre- vs post test)                                                                                                                                                                                                                                                                                                                                                                                                                                                                                                                                                                                                                                                                                                                                                                                              |                                                                                                                                                                                              | High           |    |    |                                                                                                                                                                                                                                              |                         |                           |  |  |         |                                          |      |
|                                                                                                                                                                                                                                  |                         |                                                                                  |                                          |                               |                                                                                                                                                                                                                                                                                                                                                                                                                                                                                                                                                                                                                                                                                                                                                                                                                                     |                                                                                                                                                                                                                                                                                                                                                                                                                                                                                                                                                                                                                                                                                                       |     |                                                                                                                                               |    | Subjective/perceived knowledge (according to subscale of Decisional conflict scale, range 0-100, higher scores reflect lower subjective knowledge)                                                                              | End of study visit      | 54.3 (18.3)                             |                                    |                                          | p<0.0001 (between pre- vs post test)                                                                                                                                                                                                                                                                                                                                                                                                                                                                                                                                                                                                                                                                                                                                                                                              |                                                                                                                                                                                              |                |    |    |                                                                                                                                                                                                                                              |                         |                           |  |  |         |                                          |      |
|                                                                                                                                                                                                                                  |                         |                                                                                  |                                          |                               |                                                                                                                                                                                                                                                                                                                                                                                                                                                                                                                                                                                                                                                                                                                                                                                                                                     |                                                                                                                                                                                                                                                                                                                                                                                                                                                                                                                                                                                                                                                                                                       |     |                                                                                                                                               |    | Values clarity (according to subscale of Decisional conflict scale, range 0-100, higher scores reflect lower values clarity)                                                                                                    | End of study visit      | 47.4 (16.7)                             |                                    |                                          | p<0.0001 (between pre- vs post test)                                                                                                                                                                                                                                                                                                                                                                                                                                                                                                                                                                                                                                                                                                                                                                                              |                                                                                                                                                                                              |                |    |    |                                                                                                                                                                                                                                              |                         |                           |  |  |         |                                          |      |
|                                                                                                                                                                                                                                  |                         |                                                                                  |                                          |                               |                                                                                                                                                                                                                                                                                                                                                                                                                                                                                                                                                                                                                                                                                                                                                                                                                                     |                                                                                                                                                                                                                                                                                                                                                                                                                                                                                                                                                                                                                                                                                                       |     |                                                                                                                                               |    | Willingness to try a bDMARD (according to numerous rating scale, range 0-10, higher scores reflect higher willingness)                                                                                                          | End of study visit      | 7.5 (2.5)                               |                                    |                                          | p<0.0001 (between pre- vs post test)                                                                                                                                                                                                                                                                                                                                                                                                                                                                                                                                                                                                                                                                                                                                                                                              |                                                                                                                                                                                              |                |    |    |                                                                                                                                                                                                                                              |                         |                           |  |  |         |                                          |      |
| Fraenkel, 2015                                                                                                                                                                                                                   | RCT                     | RA patients with active disease, warranting initiation or change of bDMARD (121) | CDAI 23.1                                | 7.0Y                          | Objective knowledge (according to self-developed questionnaire, range 1-20, higher score reflects more knowledge): 16.0, median; Subjective knowledge (according to subscale of Decisional conflict scale, range 0-100, higher scores reflect lower subjective knowledge): 41.7-5.0, range of medians; Values clarity (according to subscale of Decisional conflict scale, range 0-100, higher scores reflect lower values clarity): 33.3-41.7, range of medians                                                                                                                                                                                                                                                                                                                                                                    | Web-based tool: The tool is an interactive, web-based, computerized educational module with optional voiceovers that patients navigate through the use of a menubar. The tool provides an evidence-based approach to help patients extract the gist (i.e., the essential "bottom line") of available options, and retrieve and apply relevant values in order to make decisions that are concordant with personal values.                                                                                                                                                                                                                                                                             | 61  | Usual care (including education and counseling by an experienced nurse educator regarding risks and benefits of bDMARDs and how to administer | NA | Objective knowledge (post-intervention, according to self-developed questionnaire, range 1-20, higher score reflects more knowledge)                                                                                            | Change from BL until 2W | 1.0 (-1.0-2.0), median (range)          | 0 (-2.0-1.0), median (range)       |                                          | p=0.007                                                                                                                                                                                                                                                                                                                                                                                                                                                                                                                                                                                                                                                                                                                                                                                                                           | High                                                                                                                                                                                         |                |    |    |                                                                                                                                                                                                                                              |                         |                           |  |  |         |                                          |      |
|                                                                                                                                                                                                                                  |                         |                                                                                  |                                          |                               |                                                                                                                                                                                                                                                                                                                                                                                                                                                                                                                                                                                                                                                                                                                                                                                                                                     |                                                                                                                                                                                                                                                                                                                                                                                                                                                                                                                                                                                                                                                                                                       |     |                                                                                                                                               |    | Subjective knowledge (post-intervention, according to subscale of Decisional conflict scale, range 0-100, higher scores reflect lower subjective knowledge)                                                                     | Change from BL until 2W | 16.7 (4.2-37.5), median (range)         | 0 (0-16.7), median (range)         |                                          | p=0.001                                                                                                                                                                                                                                                                                                                                                                                                                                                                                                                                                                                                                                                                                                                                                                                                                           |                                                                                                                                                                                              |                |    |    |                                                                                                                                                                                                                                              |                         |                           |  |  |         |                                          |      |
|                                                                                                                                                                                                                                  |                         |                                                                                  |                                          |                               |                                                                                                                                                                                                                                                                                                                                                                                                                                                                                                                                                                                                                                                                                                                                                                                                                                     |                                                                                                                                                                                                                                                                                                                                                                                                                                                                                                                                                                                                                                                                                                       |     |                                                                                                                                               |    | Values clarity (post-intervention, according to subscale of Decisional conflict scale, range 0-100, higher scores reflect lower values clarity)                                                                                 | Change from BL until 2W | 1.0 (-1.0-2.0), median (range)          | 0 (-1.0-1.0), median (range)       |                                          | p=0.05                                                                                                                                                                                                                                                                                                                                                                                                                                                                                                                                                                                                                                                                                                                                                                                                                            |                                                                                                                                                                                              |                |    |    |                                                                                                                                                                                                                                              |                         |                           |  |  |         |                                          |      |
|                                                                                                                                                                                                                                  |                         |                                                                                  |                                          |                               |                                                                                                                                                                                                                                                                                                                                                                                                                                                                                                                                                                                                                                                                                                                                                                                                                                     |                                                                                                                                                                                                                                                                                                                                                                                                                                                                                                                                                                                                                                                                                                       |     |                                                                                                                                               |    | Risk communication at 2W (post-intervention, according to Combined Outcome Measure for Risk Communication, range 5-100, higher score reflects NR)                                                                               | Change from BL until 2W | 25.0 (0-25.0), median (range)           | 12.5 (0-25.0), median (range)      |                                          | p=0.02                                                                                                                                                                                                                                                                                                                                                                                                                                                                                                                                                                                                                                                                                                                                                                                                                            |                                                                                                                                                                                              |                |    |    |                                                                                                                                                                                                                                              |                         |                           |  |  |         |                                          |      |
| Li, 2014                                                                                                                                                                                                                         | rRCT                    | RA patients prescribed methotrexate, but unsure about starting (30)              | NR                                       | 1Y, median                    | Total decisional conflict score (according to DCIS, range 0-100, higher scores reflect more conflicts): 49.50; Uncertainty subscale (according to DCIS, range 0-100, higher scores reflect more conflicts): 78.33; Informed subscale (according to DCIS, range 0-100, higher scores reflect more conflicts): 38.33; Values clarity subscale (according to DCIS, range 0-100, higher scores reflect more conflicts): 42.50; Support subscale (according to DCIS, range 0-100, higher scores reflect more conflicts): 44.44; Methotrexate in RA knowledge (according to MTX in RA knowledge test, range 0-60, higher scores reflect better knowledge): 30.62; Ability to effectively manage and participate in health care (according to Effective Consumer Scale (EC-17), range 0-100, higher scores reflect higher ability): 68.24) | A web-based research tool for patients considering methotrexate for RA: ANSWER. Aimed to provide unbiased information on benefits and risks of methotrexate for RA and to guide users through thinking if this is the "right" treatment for them based on the information and their personal preferences. The ANSWER was an online interactive program designed to be used after individuals were recommended methotrexate for RA. It consisted of an information module and a password-protected value clarification module.                                                                                                                                                                         | 30  | NA                                                                                                                                            | NA | Total decisional conflict score (according to DCIS, range 0-100, higher scores reflect more conflicts)                                                                                                                          | 2D                      | 21.83 (24.12)                           |                                    | -27.67 (95% CI -39.89 -15.44)            | p<0.001 (between pre- vs post test)                                                                                                                                                                                                                                                                                                                                                                                                                                                                                                                                                                                                                                                                                                                                                                                               | High                                                                                                                                                                                         |                |    |    |                                                                                                                                                                                                                                              |                         |                           |  |  |         |                                          |      |
|                                                                                                                                                                                                                                  |                         |                                                                                  |                                          |                               |                                                                                                                                                                                                                                                                                                                                                                                                                                                                                                                                                                                                                                                                                                                                                                                                                                     |                                                                                                                                                                                                                                                                                                                                                                                                                                                                                                                                                                                                                                                                                                       |     |                                                                                                                                               |    | Uncertainty subscale (according to DCIS, range 0-100, higher scores reflect more conflicts)                                                                                                                                     | 2D                      | 37.5 (43.43)                            |                                    | -40.83 (95% CI -60.54 -21.12)            | p<0.001 (between pre- vs post test)                                                                                                                                                                                                                                                                                                                                                                                                                                                                                                                                                                                                                                                                                                                                                                                               |                                                                                                                                                                                              |                |    |    |                                                                                                                                                                                                                                              |                         |                           |  |  |         |                                          |      |
|                                                                                                                                                                                                                                  |                         |                                                                                  |                                          |                               |                                                                                                                                                                                                                                                                                                                                                                                                                                                                                                                                                                                                                                                                                                                                                                                                                                     |                                                                                                                                                                                                                                                                                                                                                                                                                                                                                                                                                                                                                                                                                                       |     |                                                                                                                                               |    | Informed subscale (according to DCIS, range 0-100, higher scores reflect more conflicts)                                                                                                                                        | 2D                      | 18.89 (35.49)                           |                                    | -19.44 (95% CI -37.53 -1.36)             | p<0.036 (between pre- vs post test)                                                                                                                                                                                                                                                                                                                                                                                                                                                                                                                                                                                                                                                                                                                                                                                               |                                                                                                                                                                                              |                |    |    |                                                                                                                                                                                                                                              |                         |                           |  |  |         |                                          |      |
|                                                                                                                                                                                                                                  |                         |                                                                                  |                                          |                               |                                                                                                                                                                                                                                                                                                                                                                                                                                                                                                                                                                                                                                                                                                                                                                                                                                     |                                                                                                                                                                                                                                                                                                                                                                                                                                                                                                                                                                                                                                                                                                       |     |                                                                                                                                               |    | Values clarity subscale (according to DCIS, range 0-100, higher scores reflect more conflicts)                                                                                                                                  | 2D                      | 11.67 (22.49)                           |                                    | -30.83 (95% CI -45.99 -15.68)            | p<0.001 (between pre- vs post test)                                                                                                                                                                                                                                                                                                                                                                                                                                                                                                                                                                                                                                                                                                                                                                                               |                                                                                                                                                                                              |                |    |    |                                                                                                                                                                                                                                              |                         |                           |  |  |         |                                          |      |
|                                                                                                                                                                                                                                  |                         |                                                                                  |                                          |                               |                                                                                                                                                                                                                                                                                                                                                                                                                                                                                                                                                                                                                                                                                                                                                                                                                                     |                                                                                                                                                                                                                                                                                                                                                                                                                                                                                                                                                                                                                                                                                                       |     |                                                                                                                                               |    | Support subscale (according to DCIS, range 0-100, higher scores reflect more conflicts)                                                                                                                                         | 2D                      | 21.11 (25.12)                           |                                    | -23.33 (95% CI -37.75 -8.91)             | p<0.002 (between pre- vs post test)                                                                                                                                                                                                                                                                                                                                                                                                                                                                                                                                                                                                                                                                                                                                                                                               |                                                                                                                                                                                              |                |    |    |                                                                                                                                                                                                                                              |                         |                           |  |  |         |                                          |      |
|                                                                                                                                                                                                                                  |                         |                                                                                  |                                          |                               |                                                                                                                                                                                                                                                                                                                                                                                                                                                                                                                                                                                                                                                                                                                                                                                                                                     |                                                                                                                                                                                                                                                                                                                                                                                                                                                                                                                                                                                                                                                                                                       |     |                                                                                                                                               |    | Methotrexate in RA knowledge (according to MTX in RA knowledge test, range 0-60, higher scores reflect better knowledge)                                                                                                        | 2D                      | 41.67 (6.81)                            |                                    | 11.03 (95% CI 6.73-15.34)                | p<0.001 (between pre- vs post test)                                                                                                                                                                                                                                                                                                                                                                                                                                                                                                                                                                                                                                                                                                                                                                                               |                                                                                                                                                                                              |                |    |    |                                                                                                                                                                                                                                              |                         |                           |  |  |         |                                          |      |
|                                                                                                                                                                                                                                  |                         |                                                                                  |                                          |                               |                                                                                                                                                                                                                                                                                                                                                                                                                                                                                                                                                                                                                                                                                                                                                                                                                                     |                                                                                                                                                                                                                                                                                                                                                                                                                                                                                                                                                                                                                                                                                                       |     |                                                                                                                                               |    | Ability to effectively manage and participate in health care (according to Effective Consumer Scale (EC-17), range 0-100, higher scores reflect higher ability)                                                                 | 2D                      | 72.94 (12.74)                           |                                    | 4.71 (95% CI -1.81-11.22)                | p=0.15 (between pre- vs post test)                                                                                                                                                                                                                                                                                                                                                                                                                                                                                                                                                                                                                                                                                                                                                                                                |                                                                                                                                                                                              |                |    |    |                                                                                                                                                                                                                                              |                         |                           |  |  |         |                                          |      |
|                                                                                                                                                                                                                                  |                         |                                                                                  |                                          |                               |                                                                                                                                                                                                                                                                                                                                                                                                                                                                                                                                                                                                                                                                                                                                                                                                                                     |                                                                                                                                                                                                                                                                                                                                                                                                                                                                                                                                                                                                                                                                                                       |     |                                                                                                                                               |    | Li, 2018                                                                                                                                                                                                                        | rRCT                    | RA patients starting b/bDMARD s (50)    | NR                                 | 5Y, median                               | Perceived uncertainty in choosing options, factors contributing to uncertainty and effective decision-making ( according to Decisional Conflict Scale (DCS), score 0-100, higher scores reflect higher decisional conflict): 45.9 (25.1); Impact of education intervention - self-management capacity (according to Medication Education Impact Questionnaire (MeIQ), range of score NR, higher scores reflect greater impact of education intervention): 31.8 (3.3); Impact of education intervention - self-management support (according to Medication Education Impact Questionnaire (MeIQ), range of score NR, higher scores reflect greater impact of education intervention): 17.5 (4.4); RA knowledge (according to Partners in Health Scale (PHS), score 0-88, higher scores reflect worse self-management): 25.3 (14.8) | Access to ANSWER-2, an interactive online patient decision aid, aiming to reduce patients' decisional conflicts and to improve the medication-related knowledge and self-management capacity | 50             | NA | NA | Perceived uncertainty in choosing options, factors contributing to uncertainty and effective decision-making post-intervention (according to Decisional Conflict Scale (DCS), score 0-100, higher scores reflect higher decisional conflict) | 2D                      | 25.1 (21.8)               |  |  |         | Effect size (not further specified) 0.84 | High |
|                                                                                                                                                                                                                                  |                         |                                                                                  |                                          |                               |                                                                                                                                                                                                                                                                                                                                                                                                                                                                                                                                                                                                                                                                                                                                                                                                                                     |                                                                                                                                                                                                                                                                                                                                                                                                                                                                                                                                                                                                                                                                                                       |     |                                                                                                                                               |    |                                                                                                                                                                                                                                 |                         |                                         |                                    |                                          |                                                                                                                                                                                                                                                                                                                                                                                                                                                                                                                                                                                                                                                                                                                                                                                                                                   |                                                                                                                                                                                              |                |    |    | Perceived uncertainty in choosing options, factors contributing to uncertainty and effective decision-making post-intervention (according to Decisional Conflict Scale (DCS), score 0-100, higher scores reflect higher decisional conflict) | Change from BL until 2D | -21.2 (95%CI -28.1 -14.4) |  |  | p<0.001 | Effect size (not further specified) 0.25 |      |
|                                                                                                                                                                                                                                  |                         |                                                                                  |                                          |                               |                                                                                                                                                                                                                                                                                                                                                                                                                                                                                                                                                                                                                                                                                                                                                                                                                                     |                                                                                                                                                                                                                                                                                                                                                                                                                                                                                                                                                                                                                                                                                                       |     |                                                                                                                                               |    |                                                                                                                                                                                                                                 |                         |                                         |                                    |                                          |                                                                                                                                                                                                                                                                                                                                                                                                                                                                                                                                                                                                                                                                                                                                                                                                                                   |                                                                                                                                                                                              |                |    |    | Impact of education intervention - self-management capacity post-intervention (according to Medication Education Impact Questionnaire (MeIQ), range of score NR, higher scores reflect greater impact of education intervention)             | 2D                      | 28.0 (4.9)                |  |  |         | Effect size (not further specified) 0.27 |      |
| Impact of education intervention - self-management capacity post-intervention (according to Medication Education Impact Questionnaire (MeIQ), range of score NR, higher scores reflect greater impact of education intervention) | Change from BL until 2D | 1.3 (95% CI 0.0-2.5)                                                             |                                          |                               | p=0.048                                                                                                                                                                                                                                                                                                                                                                                                                                                                                                                                                                                                                                                                                                                                                                                                                             |                                                                                                                                                                                                                                                                                                                                                                                                                                                                                                                                                                                                                                                                                                       |     |                                                                                                                                               |    |                                                                                                                                                                                                                                 |                         |                                         |                                    |                                          |                                                                                                                                                                                                                                                                                                                                                                                                                                                                                                                                                                                                                                                                                                                                                                                                                                   |                                                                                                                                                                                              |                |    |    |                                                                                                                                                                                                                                              |                         |                           |  |  |         |                                          |      |
| Li, 2018                                                                                                                                                                                                                         | rRCT                    | RA patients starting b/bDMARD s (50)                                             | NR                                       | 5Y, median                    | Perceived uncertainty in choosing options, factors contributing to uncertainty and effective decision-making ( according to Decisional Conflict Scale (DCS), score 0-100, higher scores reflect higher decisional conflict): 45.9 (25.1); Impact of education intervention - self-management capacity (according to Medication Education Impact Questionnaire (MeIQ), range of score NR, higher scores reflect greater impact of education intervention): 31.8 (3.3); Impact of education intervention - self-management support (according to Medication Education Impact Questionnaire (MeIQ), range of score NR, higher scores reflect greater impact of education intervention): 17.5 (4.4); RA knowledge (according to Partners in Health Scale (PHS), score 0-88, higher scores reflect worse self-management): 25.3 (14.8)   | Access to ANSWER-2, an interactive online patient decision aid, aiming to reduce patients' decisional conflicts and to improve the medication-related knowledge and self-management capacity                                                                                                                                                                                                                                                                                                                                                                                                                                                                                                          | 50  | NA                                                                                                                                            | NA | Impact of education intervention - self-management role post-intervention (according to Medication Education Impact Questionnaire (MeIQ), range of score NR, higher scores reflect greater impact of education intervention)    | 2D                      | 32.6 (2.8)                              |                                    |                                          |                                                                                                                                                                                                                                                                                                                                                                                                                                                                                                                                                                                                                                                                                                                                                                                                                                   | Effect size (not further specified) 0.27                                                                                                                                                     | High           |    |    |                                                                                                                                                                                                                                              |                         |                           |  |  |         |                                          |      |
|                                                                                                                                                                                                                                  |                         |                                                                                  |                                          |                               |                                                                                                                                                                                                                                                                                                                                                                                                                                                                                                                                                                                                                                                                                                                                                                                                                                     |                                                                                                                                                                                                                                                                                                                                                                                                                                                                                                                                                                                                                                                                                                       |     |                                                                                                                                               |    | Impact of education intervention - self-management role post-intervention (according to Medication Education Impact Questionnaire (MeIQ), range of score NR, higher scores reflect greater impact of education intervention)    | Change from BL until 2D | 0.9 (95%CI 0.2-1.6)                     |                                    |                                          | p=0.012                                                                                                                                                                                                                                                                                                                                                                                                                                                                                                                                                                                                                                                                                                                                                                                                                           |                                                                                                                                                                                              |                |    |    |                                                                                                                                                                                                                                              |                         |                           |  |  |         |                                          |      |
|                                                                                                                                                                                                                                  |                         |                                                                                  |                                          |                               |                                                                                                                                                                                                                                                                                                                                                                                                                                                                                                                                                                                                                                                                                                                                                                                                                                     |                                                                                                                                                                                                                                                                                                                                                                                                                                                                                                                                                                                                                                                                                                       |     |                                                                                                                                               |    | Impact of education intervention - self-management support post-intervention (according to Medication Education Impact Questionnaire (MeIQ), range of score NR, higher scores reflect greater impact of education intervention) | 2D                      | 18.9 (3.2)                              |                                    |                                          |                                                                                                                                                                                                                                                                                                                                                                                                                                                                                                                                                                                                                                                                                                                                                                                                                                   | Effect size (not further specified) 0.25                                                                                                                                                     |                |    |    |                                                                                                                                                                                                                                              |                         |                           |  |  |         |                                          |      |
|                                                                                                                                                                                                                                  |                         |                                                                                  |                                          |                               |                                                                                                                                                                                                                                                                                                                                                                                                                                                                                                                                                                                                                                                                                                                                                                                                                                     |                                                                                                                                                                                                                                                                                                                                                                                                                                                                                                                                                                                                                                                                                                       |     |                                                                                                                                               |    | Impact of education intervention - self-management support post-intervention (according to Medication Education Impact Questionnaire (MeIQ), range of score NR, higher scores reflect greater impact of education intervention) | Change from BL until 2D | 1.1 (95%CI 0.2-2.0)                     |                                    |                                          | p=0.019                                                                                                                                                                                                                                                                                                                                                                                                                                                                                                                                                                                                                                                                                                                                                                                                                           |                                                                                                                                                                                              |                |    |    |                                                                                                                                                                                                                                              |                         |                           |  |  |         |                                          |      |
|                                                                                                                                                                                                                                  |                         |                                                                                  |                                          |                               |                                                                                                                                                                                                                                                                                                                                                                                                                                                                                                                                                                                                                                                                                                                                                                                                                                     |                                                                                                                                                                                                                                                                                                                                                                                                                                                                                                                                                                                                                                                                                                       |     |                                                                                                                                               |    | RA knowledge post-intervention (according to Partners in Health Scale (PHS), score 0-88, higher scores reflect worse self-management)                                                                                           | 2D                      | 20.4 (13.0)                             |                                    |                                          |                                                                                                                                                                                                                                                                                                                                                                                                                                                                                                                                                                                                                                                                                                                                                                                                                                   | Effect size (not further specified) 0.25                                                                                                                                                     |                |    |    |                                                                                                                                                                                                                                              |                         |                           |  |  |         |                                          |      |
|                                                                                                                                                                                                                                  |                         |                                                                                  |                                          |                               |                                                                                                                                                                                                                                                                                                                                                                                                                                                                                                                                                                                                                                                                                                                                                                                                                                     |                                                                                                                                                                                                                                                                                                                                                                                                                                                                                                                                                                                                                                                                                                       |     |                                                                                                                                               |    | RA knowledge post-intervention (according to Partners in Health Scale (PHS), score 0-88, higher scores reflect worse self-management)                                                                                           | Change from BL until 2D | -3.7 (95%CI -6.3 -1.0)                  |                                    |                                          | p=0.009                                                                                                                                                                                                                                                                                                                                                                                                                                                                                                                                                                                                                                                                                                                                                                                                                           |                                                                                                                                                                                              |                |    |    |                                                                                                                                                                                                                                              |                         |                           |  |  |         |                                          |      |

BL: baseline; CDAI: clinical disease activity score; D: days; M: months; n: number of patients; NA: not applicable; NR: not reported; ns: not significant; (n)-RCT: (non-randomised controlled trial); RA: rheumatoid arthritis; SLR: systematic literature review; W: weeks; Y: years; \*: Conference abstract; #: number of studies; †: Composite scores: Change over time, otherwise fixed time point, otherwise LDA, otherwise remission; 2: Latest time point during treatment period that was reported; 3: According to Cochrane Collaboration's tool for individual studies: highest risk of bias as found
