# Supplementary material for: Pharmacological and non-pharmacological therapeutic strategies in difficult-to-treat rheumatoid arthritis: a systematic literature review informing the EULAR recommendations for the management of difficult-to-treat rheumatoid arthritis
Source: HighWire-hosted journal article supplement (doi:10.1136/rmdopen-2020-001512), 2021-01-01
Supplement: rmdopen-2020-001512supp006_data_supplement.pdf [file rmdopen-2020-001512supp006_data_supplement.pdf]

Supplementary table 6. Summary of studies on the identification of suboptimal self-management

| 1st Author, publication year                                                                           | Study design                  | Study population (n)                                               | Disease activity (mean) | Disease duration of RA (mean) | Diagnostic test Description                                                                                                                                                                                                                                                                                                                                                                                                                                          | Cut-off (if applicable) | Reference standard Description                                                                                                                                                                                                                                                                                                                                                                                                                                          | Cut-off (if applicable) | Time interval                                                            | Correlation coefficient (95% CI, p) | Other                                | Comparison of factors for successful self-management between groups Description of factors for successful self-management                                                                                                                                                                                                                                                                                                                                                          | Group 1 Frequency in group 1                                                                                                                                                                                                                                                                                                                                                                                                                                                                                                                                                                                                                                                                                                                                                                                                                                                                     | Group 2 Frequency in group 2           | Other              | Risk of bias* | Risk of bias of individual studies | Concerns regarding applicability |
|--------------------------------------------------------------------------------------------------------|-------------------------------|--------------------------------------------------------------------|-------------------------|-------------------------------|----------------------------------------------------------------------------------------------------------------------------------------------------------------------------------------------------------------------------------------------------------------------------------------------------------------------------------------------------------------------------------------------------------------------------------------------------------------------|-------------------------|-------------------------------------------------------------------------------------------------------------------------------------------------------------------------------------------------------------------------------------------------------------------------------------------------------------------------------------------------------------------------------------------------------------------------------------------------------------------------|-------------------------|--------------------------------------------------------------------------|-------------------------------------|--------------------------------------|------------------------------------------------------------------------------------------------------------------------------------------------------------------------------------------------------------------------------------------------------------------------------------------------------------------------------------------------------------------------------------------------------------------------------------------------------------------------------------|--------------------------------------------------------------------------------------------------------------------------------------------------------------------------------------------------------------------------------------------------------------------------------------------------------------------------------------------------------------------------------------------------------------------------------------------------------------------------------------------------------------------------------------------------------------------------------------------------------------------------------------------------------------------------------------------------------------------------------------------------------------------------------------------------------------------------------------------------------------------------------------------------|----------------------------------------|--------------------|---------------|------------------------------------|----------------------------------|
| <b>Diagnostic tests to assess suboptimal self-management</b>                                           |                               |                                                                    |                         |                               |                                                                                                                                                                                                                                                                                                                                                                                                                                                                      |                         |                                                                                                                                                                                                                                                                                                                                                                                                                                                                         |                         |                                                                          |                                     |                                      |                                                                                                                                                                                                                                                                                                                                                                                                                                                                                    |                                                                                                                                                                                                                                                                                                                                                                                                                                                                                                                                                                                                                                                                                                                                                                                                                                                                                                  |                                        |                    |               |                                    |                                  |
| Palmer, 2010                                                                                           | Cross-sectional               | RA patients (102)                                                  | NR                      | 8.8Y                          | Modified Rheumatology Attitude Index (mRAI, score 0-10, higher score reflects a higher degree of helplessness)<br>Modified Rheumatology Attitude Index (mRAI, score 0-10, higher score reflects a higher degree of helplessness)<br>Modified Rheumatology Attitude Index (mRAI, score 0-10, higher score reflects a higher degree of helplessness)<br>Modified Rheumatology Attitude Index (mRAI, score 0-10, higher score reflects a higher degree of helplessness) | NA<br>NA<br>NA<br>NA    | Combined questionnaire for functional impairment and quality of life assessment - Depressive symptoms<br>Pain score (NRS pain, score 0-10, higher score reflects higher level of pain)<br>Patient global assessment (according to NRS global assessment, score 0-10, higher score reflects more symptoms)<br>Functional disability (according to functional impairment questionnaire by El Miedany (2009), score 0-3, higher score reflects higher level of disability) | NA<br>NA<br>NA<br>NA    | Same time point<br>Same time point<br>Same time point<br>Same time point | 0.884<br>0.881<br>0.781<br>0.746    | p<0.01<br>p<0.01<br>p<0.01<br>p<0.01 |                                                                                                                                                                                                                                                                                                                                                                                                                                                                                    |                                                                                                                                                                                                                                                                                                                                                                                                                                                                                                                                                                                                                                                                                                                                                                                                                                                                                                  |                                        |                    |               | U/U/U/L                            | H/U/H                            |
| Sinclair, 2004                                                                                         | Cross-sectional               | Women with RA (90)                                                 | NR                      | 10.3Y                         | Modified Rheumatology Attitude Index (mRAI, score 0-10, higher score reflects a higher degree of helplessness)<br>BRCS (Brief Resilient Coping Scale)                                                                                                                                                                                                                                                                                                                | NA<br>NA                | NA                                                                                                                                                                                                                                                                                                                                                                                                                                                                      | NA                      |                                                                          |                                     |                                      | test-retest reliability: 0.71; internal consistency: alpha=0.64 (first BL), 0.76 (second BL), 0.69 (end of program), 0.71 (3M follow-up); stability: 0.68                                                                                                                                                                                                                                                                                                                          |                                                                                                                                                                                                                                                                                                                                                                                                                                                                                                                                                                                                                                                                                                                                                                                                                                                                                                  |                                        |                    |               | U/U/U/L                            | H/U/L                            |
| Garratt, 2014                                                                                          | SLR: 15 studies (unspecified) | RA patients (1192), total of 3527 patients with rheumatic diseases | NR                      | 5.25Y                         | Personal coping resources (part of BRCS) - Helplessness                                                                                                                                                                                                                                                                                                                                                                                                              | NA                      | Arthritis Helplessness Index (5-item helplessness subscale)                                                                                                                                                                                                                                                                                                                                                                                                             | NA                      |                                                                          | -0.32                               | p<0.05                               | internal consistency: alpha=0.68                                                                                                                                                                                                                                                                                                                                                                                                                                                   | #=1; Fifteen articles met the inclusion criteria that included the arthritis SE scales (ASES), generalized SE scale (GSES), joint protection SE scale (JP-SES), Marcus & Resnick SE exercise/behaviour (SEEB) instruments, and RA SE scale (RASE). The ASES and RASE have undergone more than one evaluation. There was little formal evaluation of content validity for the instruments. Evidence for the RASE suggests that it is not unidimensional. The JP-SES and SEEB were evaluated using modern psychometric methods. The instruments require further evaluation before application. The quality of the evidence for the ASES and RASE is generally poor. The generic focus of the GSES limits its relevance. The JP-SES and SEEB have only undergone one evaluation and that relating to the latter was narrow in scope. Future studies should address these methodological weaknesses. | Moderate                               | Moderate-High      |               |                                    |                                  |
|                                                                                                        |                               |                                                                    |                         |                               | Personal coping resources (part of BRCS) - Psychological vulnerability                                                                                                                                                                                                                                                                                                                                                                                               | NA                      | Psychological Vulnerability Scale                                                                                                                                                                                                                                                                                                                                                                                                                                       | NA                      |                                                                          | -0.26                               | p<0.05                               |                                                                                                                                                                                                                                                                                                                                                                                                                                                                                    |                                                                                                                                                                                                                                                                                                                                                                                                                                                                                                                                                                                                                                                                                                                                                                                                                                                                                                  |                                        |                    |               |                                    |                                  |
|                                                                                                        |                               |                                                                    |                         |                               | Personal coping resources (part of BRCS) - Dispositional optimism                                                                                                                                                                                                                                                                                                                                                                                                    | NA                      | Life Orientation Test                                                                                                                                                                                                                                                                                                                                                                                                                                                   | NA                      |                                                                          | 0.5                                 | p<0.01                               |                                                                                                                                                                                                                                                                                                                                                                                                                                                                                    |                                                                                                                                                                                                                                                                                                                                                                                                                                                                                                                                                                                                                                                                                                                                                                                                                                                                                                  |                                        |                    |               |                                    |                                  |
|                                                                                                        |                               |                                                                    |                         |                               | Personal coping resources (part of BRCS) - Perceived health competence                                                                                                                                                                                                                                                                                                                                                                                               | NA                      | Perceived Health Competence Scale                                                                                                                                                                                                                                                                                                                                                                                                                                       | NA                      |                                                                          | 0.39                                | p<0.01                               |                                                                                                                                                                                                                                                                                                                                                                                                                                                                                    |                                                                                                                                                                                                                                                                                                                                                                                                                                                                                                                                                                                                                                                                                                                                                                                                                                                                                                  |                                        |                    |               |                                    |                                  |
|                                                                                                        |                               |                                                                    |                         |                               | Personal coping resources (part of BRCS) - Self-efficacy (pain)                                                                                                                                                                                                                                                                                                                                                                                                      | NA                      | Arthritis Self-Efficacy Scale                                                                                                                                                                                                                                                                                                                                                                                                                                           | NA                      |                                                                          | 0.48                                | p<0.01                               |                                                                                                                                                                                                                                                                                                                                                                                                                                                                                    |                                                                                                                                                                                                                                                                                                                                                                                                                                                                                                                                                                                                                                                                                                                                                                                                                                                                                                  |                                        |                    |               |                                    |                                  |
|                                                                                                        |                               |                                                                    |                         |                               | Personal coping resources (part of BRCS) - Self-efficacy (arthritis symptoms)                                                                                                                                                                                                                                                                                                                                                                                        | NA                      | Arthritis Self-Efficacy Scale                                                                                                                                                                                                                                                                                                                                                                                                                                           | NA                      |                                                                          | 0.37                                | p<0.01                               |                                                                                                                                                                                                                                                                                                                                                                                                                                                                                    |                                                                                                                                                                                                                                                                                                                                                                                                                                                                                                                                                                                                                                                                                                                                                                                                                                                                                                  |                                        |                    |               |                                    |                                  |
|                                                                                                        |                               |                                                                    |                         |                               | Pain coping behaviors (part of BRCS) - Reappraisal                                                                                                                                                                                                                                                                                                                                                                                                                   | NA                      | Vanderbilt Multidimensional Pain Coping Inventory (VMPCI) shortened version                                                                                                                                                                                                                                                                                                                                                                                             | NA                      |                                                                          | 0.6                                 | p<0.01                               |                                                                                                                                                                                                                                                                                                                                                                                                                                                                                    |                                                                                                                                                                                                                                                                                                                                                                                                                                                                                                                                                                                                                                                                                                                                                                                                                                                                                                  |                                        |                    |               |                                    |                                  |
|                                                                                                        |                               |                                                                    |                         |                               | Pain coping behaviors (part of BRCS) - Active problem solving                                                                                                                                                                                                                                                                                                                                                                                                        | NA                      | Vanderbilt Multidimensional Pain Coping Inventory (VMPCI) shortened version                                                                                                                                                                                                                                                                                                                                                                                             | NA                      |                                                                          | 0.57                                | p<0.01                               |                                                                                                                                                                                                                                                                                                                                                                                                                                                                                    |                                                                                                                                                                                                                                                                                                                                                                                                                                                                                                                                                                                                                                                                                                                                                                                                                                                                                                  |                                        |                    |               |                                    |                                  |
|                                                                                                        |                               |                                                                    |                         |                               | Pain coping behaviors (part of BRCS) - Seeking social support                                                                                                                                                                                                                                                                                                                                                                                                        | NA                      | Vanderbilt Multidimensional Pain Coping Inventory (VMPCI) shortened version                                                                                                                                                                                                                                                                                                                                                                                             | NA                      |                                                                          | 0.24                                | p<0.05                               |                                                                                                                                                                                                                                                                                                                                                                                                                                                                                    |                                                                                                                                                                                                                                                                                                                                                                                                                                                                                                                                                                                                                                                                                                                                                                                                                                                                                                  |                                        |                    |               |                                    |                                  |
|                                                                                                        |                               |                                                                    |                         |                               | Pain coping behaviors (part of BRCS) - Acceptance                                                                                                                                                                                                                                                                                                                                                                                                                    | NA                      | Vanderbilt Multidimensional Pain Coping Inventory (VMPCI) shortened version                                                                                                                                                                                                                                                                                                                                                                                             | NA                      |                                                                          | 0.36                                | p<0.01                               |                                                                                                                                                                                                                                                                                                                                                                                                                                                                                    |                                                                                                                                                                                                                                                                                                                                                                                                                                                                                                                                                                                                                                                                                                                                                                                                                                                                                                  |                                        |                    |               |                                    |                                  |
|                                                                                                        |                               |                                                                    |                         |                               | Pain coping behaviors (part of BRCS) - Catastrophizing                                                                                                                                                                                                                                                                                                                                                                                                               | NA                      | Vanderbilt Multidimensional Pain Coping Inventory (VMPCI) shortened version                                                                                                                                                                                                                                                                                                                                                                                             | NA                      |                                                                          | -0.38                               | p<0.01                               |                                                                                                                                                                                                                                                                                                                                                                                                                                                                                    |                                                                                                                                                                                                                                                                                                                                                                                                                                                                                                                                                                                                                                                                                                                                                                                                                                                                                                  |                                        |                    |               |                                    |                                  |
|                                                                                                        |                               |                                                                    |                         |                               | Pain coping behaviors (part of BRCS) - Venting                                                                                                                                                                                                                                                                                                                                                                                                                       | NA                      | Vanderbilt Multidimensional Pain Coping Inventory (VMPCI) shortened version                                                                                                                                                                                                                                                                                                                                                                                             | NA                      |                                                                          | -0.22                               | p<0.05                               |                                                                                                                                                                                                                                                                                                                                                                                                                                                                                    |                                                                                                                                                                                                                                                                                                                                                                                                                                                                                                                                                                                                                                                                                                                                                                                                                                                                                                  |                                        |                    |               |                                    |                                  |
|                                                                                                        |                               |                                                                    |                         |                               | Psychological well-being (part of BRCS) - Positive affect                                                                                                                                                                                                                                                                                                                                                                                                            | NA                      | Positive and Negative Affect Schedule (PANAS); and Life Satisfaction Scale                                                                                                                                                                                                                                                                                                                                                                                              | NA                      |                                                                          | 0.5                                 | p<0.01                               |                                                                                                                                                                                                                                                                                                                                                                                                                                                                                    |                                                                                                                                                                                                                                                                                                                                                                                                                                                                                                                                                                                                                                                                                                                                                                                                                                                                                                  |                                        |                    |               |                                    |                                  |
|                                                                                                        |                               |                                                                    |                         |                               | Psychological well-being (part of BRCS) - Negative affect                                                                                                                                                                                                                                                                                                                                                                                                            | NA                      | Positive and Negative Affect Schedule (PANAS); and Life Satisfaction Scale                                                                                                                                                                                                                                                                                                                                                                                              | NA                      |                                                                          | -0.28                               | p<0.01                               |                                                                                                                                                                                                                                                                                                                                                                                                                                                                                    |                                                                                                                                                                                                                                                                                                                                                                                                                                                                                                                                                                                                                                                                                                                                                                                                                                                                                                  |                                        |                    |               |                                    |                                  |
|                                                                                                        |                               |                                                                    |                         |                               | Psychological well-being (part of BRCS) - Life satisfaction                                                                                                                                                                                                                                                                                                                                                                                                          | NA                      | Positive and Negative Affect Schedule (PANAS); and Life Satisfaction Scale                                                                                                                                                                                                                                                                                                                                                                                              | NA                      |                                                                          | 0.25                                | p<0.05                               |                                                                                                                                                                                                                                                                                                                                                                                                                                                                                    |                                                                                                                                                                                                                                                                                                                                                                                                                                                                                                                                                                                                                                                                                                                                                                                                                                                                                                  |                                        |                    |               |                                    |                                  |
|                                                                                                        |                               |                                                                    |                         |                               | BRCS (Brief Resilient Coping Scale)                                                                                                                                                                                                                                                                                                                                                                                                                                  | NA                      | NA                                                                                                                                                                                                                                                                                                                                                                                                                                                                      | NA                      |                                                                          |                                     |                                      |                                                                                                                                                                                                                                                                                                                                                                                                                                                                                    |                                                                                                                                                                                                                                                                                                                                                                                                                                                                                                                                                                                                                                                                                                                                                                                                                                                                                                  |                                        |                    |               |                                    |                                  |
|                                                                                                        |                               |                                                                    |                         |                               | Personal coping resources (part of BRCS) - Helplessness                                                                                                                                                                                                                                                                                                                                                                                                              | NA                      | Arthritis Helplessness Index (5-item helplessness subscale)                                                                                                                                                                                                                                                                                                                                                                                                             | NA                      |                                                                          | -0.32                               | p<0.01                               |                                                                                                                                                                                                                                                                                                                                                                                                                                                                                    |                                                                                                                                                                                                                                                                                                                                                                                                                                                                                                                                                                                                                                                                                                                                                                                                                                                                                                  |                                        |                    |               |                                    |                                  |
|                                                                                                        |                               |                                                                    |                         |                               | Personal coping resources (part of BRCS) - Psychological vulnerability                                                                                                                                                                                                                                                                                                                                                                                               | NA                      | Psychological Vulnerability Scale                                                                                                                                                                                                                                                                                                                                                                                                                                       | NA                      |                                                                          | -0.17                               | p<0.05                               |                                                                                                                                                                                                                                                                                                                                                                                                                                                                                    |                                                                                                                                                                                                                                                                                                                                                                                                                                                                                                                                                                                                                                                                                                                                                                                                                                                                                                  |                                        |                    |               |                                    |                                  |
|                                                                                                        |                               |                                                                    |                         |                               | Personal coping resources (part of BRCS) - Dispositional optimism                                                                                                                                                                                                                                                                                                                                                                                                    | NA                      | Life Orientation Test                                                                                                                                                                                                                                                                                                                                                                                                                                                   | NA                      |                                                                          | 0.41                                | p<0.001                              |                                                                                                                                                                                                                                                                                                                                                                                                                                                                                    |                                                                                                                                                                                                                                                                                                                                                                                                                                                                                                                                                                                                                                                                                                                                                                                                                                                                                                  |                                        |                    |               |                                    |                                  |
|                                                                                                        |                               |                                                                    |                         |                               | Personal coping resources (part of BRCS) - Perceived health competence                                                                                                                                                                                                                                                                                                                                                                                               | NA                      | Perceived Health Competence Scale                                                                                                                                                                                                                                                                                                                                                                                                                                       | NA                      |                                                                          | 0.39                                | p<0.01                               |                                                                                                                                                                                                                                                                                                                                                                                                                                                                                    |                                                                                                                                                                                                                                                                                                                                                                                                                                                                                                                                                                                                                                                                                                                                                                                                                                                                                                  |                                        |                    |               |                                    |                                  |
|                                                                                                        |                               |                                                                    |                         |                               | Personal coping resources (part of BRCS) - Self-efficacy (pain)                                                                                                                                                                                                                                                                                                                                                                                                      | NA                      | Arthritis Self-Efficacy Scale                                                                                                                                                                                                                                                                                                                                                                                                                                           | NA                      |                                                                          | 0.18                                | p<0.05                               |                                                                                                                                                                                                                                                                                                                                                                                                                                                                                    |                                                                                                                                                                                                                                                                                                                                                                                                                                                                                                                                                                                                                                                                                                                                                                                                                                                                                                  |                                        |                    |               |                                    |                                  |
|                                                                                                        |                               |                                                                    |                         |                               | Personal coping resources (part of BRCS) - Self-efficacy (arthritis symptoms)                                                                                                                                                                                                                                                                                                                                                                                        | NA                      | Arthritis Self-Efficacy Scale                                                                                                                                                                                                                                                                                                                                                                                                                                           | NA                      |                                                                          | 0.3                                 | p<0.001                              |                                                                                                                                                                                                                                                                                                                                                                                                                                                                                    |                                                                                                                                                                                                                                                                                                                                                                                                                                                                                                                                                                                                                                                                                                                                                                                                                                                                                                  |                                        |                    |               |                                    |                                  |
|                                                                                                        |                               |                                                                    |                         |                               | Pain coping behaviors (part of BRCS) - Reappraisal                                                                                                                                                                                                                                                                                                                                                                                                                   | NA                      | Vanderbilt Multidimensional Pain Coping Inventory (VMPCI)                                                                                                                                                                                                                                                                                                                                                                                                               | NA                      |                                                                          | 0.56                                | p<0.001                              |                                                                                                                                                                                                                                                                                                                                                                                                                                                                                    |                                                                                                                                                                                                                                                                                                                                                                                                                                                                                                                                                                                                                                                                                                                                                                                                                                                                                                  |                                        |                    |               |                                    |                                  |
|                                                                                                        |                               |                                                                    |                         |                               | Pain coping behaviors (part of BRCS) - Active problem solving                                                                                                                                                                                                                                                                                                                                                                                                        | NA                      | Vanderbilt Multidimensional Pain Coping Inventory (VMPCI)                                                                                                                                                                                                                                                                                                                                                                                                               | NA                      |                                                                          | 0.4                                 | p<0.001                              |                                                                                                                                                                                                                                                                                                                                                                                                                                                                                    |                                                                                                                                                                                                                                                                                                                                                                                                                                                                                                                                                                                                                                                                                                                                                                                                                                                                                                  |                                        |                    |               |                                    |                                  |
|                                                                                                        |                               |                                                                    |                         |                               | Pain coping behaviors (part of BRCS) - Seeking social support                                                                                                                                                                                                                                                                                                                                                                                                        | NA                      | Vanderbilt Multidimensional Pain Coping Inventory (VMPCI)                                                                                                                                                                                                                                                                                                                                                                                                               | NA                      |                                                                          | 0.23                                | p<0.01                               |                                                                                                                                                                                                                                                                                                                                                                                                                                                                                    |                                                                                                                                                                                                                                                                                                                                                                                                                                                                                                                                                                                                                                                                                                                                                                                                                                                                                                  |                                        |                    |               |                                    |                                  |
|                                                                                                        |                               |                                                                    |                         |                               | Pain coping behaviors (part of BRCS) - Acceptance                                                                                                                                                                                                                                                                                                                                                                                                                    | NA                      | Vanderbilt Multidimensional Pain Coping Inventory (VMPCI)                                                                                                                                                                                                                                                                                                                                                                                                               | NA                      |                                                                          | ns                                  |                                      |                                                                                                                                                                                                                                                                                                                                                                                                                                                                                    |                                                                                                                                                                                                                                                                                                                                                                                                                                                                                                                                                                                                                                                                                                                                                                                                                                                                                                  |                                        |                    |               |                                    |                                  |
|                                                                                                        |                               |                                                                    |                         |                               | Pain coping behaviors (part of BRCS) - Catastrophizing                                                                                                                                                                                                                                                                                                                                                                                                               | NA                      | Vanderbilt Multidimensional Pain Coping Inventory (VMPCI)                                                                                                                                                                                                                                                                                                                                                                                                               | NA                      |                                                                          | -0.41                               | p<0.001                              |                                                                                                                                                                                                                                                                                                                                                                                                                                                                                    |                                                                                                                                                                                                                                                                                                                                                                                                                                                                                                                                                                                                                                                                                                                                                                                                                                                                                                  |                                        |                    |               |                                    |                                  |
|                                                                                                        |                               |                                                                    |                         |                               | Pain coping behaviors (part of BRCS) - Venting                                                                                                                                                                                                                                                                                                                                                                                                                       | NA                      | Vanderbilt Multidimensional Pain Coping Inventory (VMPCI) shortened version                                                                                                                                                                                                                                                                                                                                                                                             | NA                      |                                                                          | -0.25                               | p<0.01                               |                                                                                                                                                                                                                                                                                                                                                                                                                                                                                    |                                                                                                                                                                                                                                                                                                                                                                                                                                                                                                                                                                                                                                                                                                                                                                                                                                                                                                  |                                        |                    |               |                                    |                                  |
|                                                                                                        |                               |                                                                    |                         |                               | Psychological well-being (part of BRCS) - Positive affect                                                                                                                                                                                                                                                                                                                                                                                                            | NA                      | Positive and Negative Affect Schedule (PANAS); and Life Satisfaction Scale                                                                                                                                                                                                                                                                                                                                                                                              | NA                      |                                                                          | 0.47                                | p<0.001                              |                                                                                                                                                                                                                                                                                                                                                                                                                                                                                    |                                                                                                                                                                                                                                                                                                                                                                                                                                                                                                                                                                                                                                                                                                                                                                                                                                                                                                  |                                        |                    |               |                                    |                                  |
|                                                                                                        |                               |                                                                    |                         |                               | Psychological well-being (part of BRCS) - Negative affect                                                                                                                                                                                                                                                                                                                                                                                                            | NA                      | Positive and Negative Affect Schedule (PANAS); and Life Satisfaction Scale                                                                                                                                                                                                                                                                                                                                                                                              | NA                      |                                                                          | -0.3                                | p<0.001                              |                                                                                                                                                                                                                                                                                                                                                                                                                                                                                    |                                                                                                                                                                                                                                                                                                                                                                                                                                                                                                                                                                                                                                                                                                                                                                                                                                                                                                  |                                        |                    |               |                                    |                                  |
|                                                                                                        |                               |                                                                    |                         |                               | Psychological well-being (part of BRCS) - Life satisfaction                                                                                                                                                                                                                                                                                                                                                                                                          | NA                      | Positive and Negative Affect Schedule (PANAS); and Life Satisfaction Scale                                                                                                                                                                                                                                                                                                                                                                                              | NA                      |                                                                          | 0.24                                | p<0.01                               |                                                                                                                                                                                                                                                                                                                                                                                                                                                                                    |                                                                                                                                                                                                                                                                                                                                                                                                                                                                                                                                                                                                                                                                                                                                                                                                                                                                                                  |                                        |                    |               |                                    |                                  |
|                                                                                                        |                               |                                                                    |                         |                               | Psychological well-being (part of BRCS) - CES-D                                                                                                                                                                                                                                                                                                                                                                                                                      | NA                      | Center for Epidemiological Studies-Depression Scale                                                                                                                                                                                                                                                                                                                                                                                                                     | NA                      |                                                                          | -0.3                                | p<0.001                              |                                                                                                                                                                                                                                                                                                                                                                                                                                                                                    |                                                                                                                                                                                                                                                                                                                                                                                                                                                                                                                                                                                                                                                                                                                                                                                                                                                                                                  |                                        |                    |               |                                    |                                  |
|                                                                                                        |                               |                                                                    |                         |                               | Arthritis Self-efficacy Scale (score 10-100, higher score reflects higher self-efficacy)                                                                                                                                                                                                                                                                                                                                                                             | NA                      | NR                                                                                                                                                                                                                                                                                                                                                                                                                                                                      | NR                      |                                                                          |                                     |                                      |                                                                                                                                                                                                                                                                                                                                                                                                                                                                                    |                                                                                                                                                                                                                                                                                                                                                                                                                                                                                                                                                                                                                                                                                                                                                                                                                                                                                                  |                                        |                    |               |                                    |                                  |
| <b>Factors associated with successful self-management, as assessed by patients and rheumatologists</b> |                               |                                                                    |                         |                               |                                                                                                                                                                                                                                                                                                                                                                                                                                                                      |                         |                                                                                                                                                                                                                                                                                                                                                                                                                                                                         |                         |                                                                          |                                     |                                      |                                                                                                                                                                                                                                                                                                                                                                                                                                                                                    |                                                                                                                                                                                                                                                                                                                                                                                                                                                                                                                                                                                                                                                                                                                                                                                                                                                                                                  |                                        |                    |               |                                    |                                  |
| Gibofsky, 2018                                                                                         | Cross-sectional               | RA patients (1805) + physicians (1736)                             | NR                      | 7Y                            | NA                                                                                                                                                                                                                                                                                                                                                                                                                                                                   |                         | NA                                                                                                                                                                                                                                                                                                                                                                                                                                                                      |                         |                                                                          |                                     |                                      | Information Dialogue/discussion<br>More/longer/additional visits<br>Treatment goals<br>Access to visits/treatment<br>Tools/classes<br>Do patients want to know more about arthritis?                                                                                                                                                                                                                                                                                               | RA patients 55%<br>Physicians 52%<br>41%<br>38%<br>36%<br>35%                                                                                                                                                                                                                                                                                                                                                                                                                                                                                                                                                                                                                                                                                                                                                                                                                                    | 64%<br>76%<br>65%<br>57%<br>62%<br>52% |                    | U/L/U/H       | H/U/L                              |                                  |
| Silvers, 1985                                                                                          | Cross-sectional               | RA patients (101) + rheumatologists (28)                           | NR                      | 14.2Y                         | NA                                                                                                                                                                                                                                                                                                                                                                                                                                                                   |                         | NA                                                                                                                                                                                                                                                                                                                                                                                                                                                                      |                         |                                                                          |                                     |                                      | Extremely/very important role of allied health professionals in facilitating arthritis education: physical therapist<br>Extremely/very important role of allied health professionals in facilitating arthritis education: pharmacist<br>Extremely/very important role of allied health professionals in facilitating arthritis education: occupational therapist<br>Extremely/very important role of allied health professionals in facilitating arthritis education: nutritionist | Patients 92%<br>Rheumatologists 70%                                                                                                                                                                                                                                                                                                                                                                                                                                                                                                                                                                                                                                                                                                                                                                                                                                                              | ns<br>73%<br>39%<br>69%                | p<0.001<br>p<0.001 | U/L/U/L       | H/U/L                              |                                  |

|                                                                                                                            |                             |                               |             |  |  |
|----------------------------------------------------------------------------------------------------------------------------|-----------------------------|-------------------------------|-------------|--|--|
| Extremely/very important role of allied health professionals in facilitating arthritis education: nurse                    |                             |                               | ns          |  |  |
| Extremely/very important role of allied health professionals in facilitating arthritis education: trained group leader     |                             |                               | ns          |  |  |
| Extremely/very important role of allied health professionals in facilitating arthritis education: arthritis representative |                             |                               | ns          |  |  |
| Extremely/very important role of allied health professionals in facilitating arthritis education: social worker            |                             |                               | ns          |  |  |
| Extremely/very important topics in arthritis patient education: psychosocial needs                                         | ~65%                        | Higher in physicians          | p<0.001     |  |  |
| Extremely/very important topics in arthritis patient education: activities of daily living                                 |                             | Higher in physicians          | p<0.001     |  |  |
| Extremely/very important topics in arthritis patient education: sexual concerns                                            |                             | Higher in physicians          | p<0.015     |  |  |
| Extremely/very important topics in arthritis patient education: community resources                                        |                             | Higher in physicians (68-89%) | p<0.015     |  |  |
| Extremely/very important topics in arthritis patient education: disease process                                            | Higher in patients (91-95%) |                               | p<0.001     |  |  |
| Extremely/very important topics in arthritis patient education: diagnostic process                                         | Higher in patients (72-82%) |                               | 56% p<0.001 |  |  |
| Extremely/very important topics in arthritis patient education: nutrition                                                  | Higher in patients (72-82%) |                               | p<0.001     |  |  |
| Extremely/very important topics in arthritis patient education: interpersonal communication between physician and patient  | 91-95%                      |                               | 100% ns     |  |  |
| Extremely/very important topics in arthritis patient education: medication                                                 | 91-95%                      |                               | 96% ns      |  |  |
| Extremely/very important topics in arthritis patient education: maintaining ambulation                                     | 72-82%                      | 68-89%                        | ns          |  |  |
| Extremely/very important topics in arthritis patient education: recognising quackery                                       | 72-82%                      | 68-89%                        | ns          |  |  |
| Extremely/very important topics in arthritis patient education: rest and relaxation                                        | 72-82%                      | 68-89%                        | ns          |  |  |
| Extremely/very important topics in arthritis patient education: special pain relief                                        | 72-82%                      | 68-89%                        | ns          |  |  |
| Extremely/very important topics in arthritis patient education: prescribed exercise                                        | 72-82%                      | 68-89%                        | ns          |  |  |
| Extremely/very important topics in arthritis patient education: cooperative disease management                             | 72-82%                      | 68-89%                        | ns          |  |  |
| Extremely/very important topics in arthritis patient education: surgical procedures                                        | 72-82%                      | 68-89%                        | ns          |  |  |
| Extremely/very important topics in arthritis patient education: energy conservation                                        | ~65%                        |                               | 59% ns      |  |  |
| Extremely/very important topics in arthritis patient education: weight management                                          | ~65%                        |                               | 46% ns      |  |  |
| Most important education channel: individual meeting between patient and physicians                                        | 78%                         |                               | 86%         |  |  |
| Very important education channel: planned education group                                                                  | 45%                         |                               | 85% p<0.002 |  |  |

BL: baseline; H: high; L: low; M: months; n: number of patients; NA: not applicable; NR: not reported; ns: not significant; RA: rheumatoid arthritis; SLR: systematic literature review; U: uncertain; W: weeks; Y: years; \*: Conference abstract; #: number of studies. 1. Risk of Bias according to QUADAS-2 for individual studies: Patient selection/index test/Reference standard/Flow and timing. According to AMSTAR2 tool for SLRs: Low=zero or one non-critical weakness; Moderate=more than one non-critical weakness; High=one critical flaw with or without non-critical weaknesses; Critically high=more than one critical flaw with or without non-critical weaknesses; 2. Only applicable for SLRs: Summary of RoB of individual studies, as assessed in SLR Highest risk of bias as found (of individual studies). 3. Concerns regarding applicability for individual studies: Patient selection/index test/Reference standard
