# Supplementary material for: Pharmacological and non-pharmacological therapeutic strategies in difficult-to-treat rheumatoid arthritis: a systematic literature review informing the EULAR recommendations for the management of difficult-to-treat rheumatoid arthritis
Source: HighWire-hosted journal article supplement (doi:10.1136/rmdopen-2020-001512), 2021-01-01
Supplement: rmdopen-2020-001512supp007_data_supplement.pdf [file rmdopen-2020-001512supp007_data_supplement.pdf]

Supplementary table 7. Summary of studies on the optimisation of self-management

| 1st Author, publication year                                                       | Study design         | Patients (total n)                                                        | Disease activity at baseline (mean (SD)) | Disease duration (mean (SD)) | Self-management at baseline (mean (SD))                                                                                                                                                                                                                                              | Anxiety                                                                                                                           | Depression                                                                                                                                                          | Other                                                                                                                                                                                                                                                                                                                                                                                                                                    | Intervention group Description                                                                                                                                                                                                                                                                                                                                                   | n    | Comparator Description                                                                                                               | n   | Outcome Description*1                                                                                                                                   | Time point <sup>2</sup> | Risk ratio (95% CI)    | Mean outcome in intervention group (SD) | Mean outcome in control group (SD) | Mean difference (standard error, 95% CI) | p-value                                  | Effect size (Cohen's d, if reported or calculable) | Other                                                                                                                                                                                                                                                                                                                                       | Risk of bias*3                                                                                                                                                                             | Risk of bias of individual studies included in SLR*4 |  |
|------------------------------------------------------------------------------------|----------------------|---------------------------------------------------------------------------|------------------------------------------|------------------------------|--------------------------------------------------------------------------------------------------------------------------------------------------------------------------------------------------------------------------------------------------------------------------------------|-----------------------------------------------------------------------------------------------------------------------------------|---------------------------------------------------------------------------------------------------------------------------------------------------------------------|------------------------------------------------------------------------------------------------------------------------------------------------------------------------------------------------------------------------------------------------------------------------------------------------------------------------------------------------------------------------------------------------------------------------------------------|----------------------------------------------------------------------------------------------------------------------------------------------------------------------------------------------------------------------------------------------------------------------------------------------------------------------------------------------------------------------------------|------|--------------------------------------------------------------------------------------------------------------------------------------|-----|---------------------------------------------------------------------------------------------------------------------------------------------------------|-------------------------|------------------------|-----------------------------------------|------------------------------------|------------------------------------------|------------------------------------------|----------------------------------------------------|---------------------------------------------------------------------------------------------------------------------------------------------------------------------------------------------------------------------------------------------------------------------------------------------------------------------------------------------|--------------------------------------------------------------------------------------------------------------------------------------------------------------------------------------------|------------------------------------------------------|--|
| <b>Self-efficacy</b>                                                               |                      |                                                                           |                                          |                              |                                                                                                                                                                                                                                                                                      |                                                                                                                                   |                                                                                                                                                                     |                                                                                                                                                                                                                                                                                                                                                                                                                                          |                                                                                                                                                                                                                                                                                                                                                                                  |      |                                                                                                                                      |     |                                                                                                                                                         |                         |                        |                                         |                                    |                                          |                                          |                                                    |                                                                                                                                                                                                                                                                                                                                             |                                                                                                                                                                                            |                                                      |  |
| <b>Self-management programs (combination of non-pharmacological interventions)</b> |                      |                                                                           |                                          |                              |                                                                                                                                                                                                                                                                                      |                                                                                                                                   |                                                                                                                                                                     |                                                                                                                                                                                                                                                                                                                                                                                                                                          |                                                                                                                                                                                                                                                                                                                                                                                  |      |                                                                                                                                      |     |                                                                                                                                                         |                         |                        |                                         |                                    |                                          |                                          |                                                    |                                                                                                                                                                                                                                                                                                                                             |                                                                                                                                                                                            |                                                      |  |
| Albano, 2010                                                                       | SR, 10RCTs, 20 rRCTs | RA patients (9955)                                                        | NR                                       | NR                           | NR                                                                                                                                                                                                                                                                                   |                                                                                                                                   |                                                                                                                                                                     |                                                                                                                                                                                                                                                                                                                                                                                                                                          | Educational programs (aiming at increasing knowledge and improving performance) and psycho-educational programs (combining teaching intervention activities to improve coping and change behaviour)                                                                                                                                                                              | #12  | NR                                                                                                                                   | NR  | Self-efficacy                                                                                                                                           | NR                      |                        |                                         |                                    |                                          |                                          |                                                    | Improvement in 11 studies; no improvement in 3 study; Conclusion: A large number of studies still assess the positive effects of therapeutic patient education. Nowadays, the problems of short-term efficacy of therapeutic patient education and the cultural and social barriers to this practice have become a major issue for research | Moderate                                                                                                                                                                                   | High                                                 |  |
| Anwar, 2018                                                                        | RCT                  | Older women with RA (76)                                                  | NR                                       | NR                           | Self-efficacy pain (ASES): 40.16; Self-efficacy function (ASES): 63.01                                                                                                                                                                                                               |                                                                                                                                   |                                                                                                                                                                     |                                                                                                                                                                                                                                                                                                                                                                                                                                          | Self-management program: Participants in these classes followed a six week, multidisciplinary, group rehabilitation program as well as a peer education program, consisting of exercise and educational components (six weekly sessions of 1.3.5h).                                                                                                                              | 39   | Control: NR                                                                                                                          | 37  | Self-efficacy pain (according to ASES, score 0-100, higher score reflects higher self-efficacy)                                                         | 6W                      | 66.31 (3.08)           | 42.56 (2.66)                            | 23.75 (0.42)                       | p<0.001                                  | 8.25                                     |                                                    |                                                                                                                                                                                                                                                                                                                                             | High                                                                                                                                                                                       |                                                      |  |
|                                                                                    |                      |                                                                           |                                          |                              |                                                                                                                                                                                                                                                                                      |                                                                                                                                   |                                                                                                                                                                     |                                                                                                                                                                                                                                                                                                                                                                                                                                          |                                                                                                                                                                                                                                                                                                                                                                                  |      |                                                                                                                                      |     | Self-efficacy function (according to ASES, score 0-100, higher score reflects higher self-efficacy)                                                     | 6W                      | 85.29 (3.26)           | 60.97 (3.21)                            | 24.32 (0.05)                       | p<0.001                                  | 7.52                                     |                                                    |                                                                                                                                                                                                                                                                                                                                             | High                                                                                                                                                                                       |                                                      |  |
| Beil, 1998                                                                         | RCT                  | Patients with active RA (150)                                             | NR                                       | 7.5Y                         | Self-efficacy (according to Stanford Arthritis Self-Efficacy Scale (SES), score 0-100, higher score reflects higher self-efficacy): 49.2                                                                                                                                             |                                                                                                                                   |                                                                                                                                                                     |                                                                                                                                                                                                                                                                                                                                                                                                                                          | Education and exercise program consisting of >3 visits of 3 hours of physical therapy                                                                                                                                                                                                                                                                                            | 76   | Wait list                                                                                                                            | 74  | Self-efficacy (ITT analysis, according to Stanford Arthritis Self-Efficacy Scale (SES), score 0-100, higher score reflects higher self-efficacy)        | 6W                      | 63.2 (18.4)            | 57.7 (20.7)                             | 5.5 (10.7)                         | 0.28                                     |                                          |                                                    |                                                                                                                                                                                                                                                                                                                                             | High                                                                                                                                                                                       |                                                      |  |
|                                                                                    |                      |                                                                           |                                          |                              |                                                                                                                                                                                                                                                                                      |                                                                                                                                   |                                                                                                                                                                     |                                                                                                                                                                                                                                                                                                                                                                                                                                          |                                                                                                                                                                                                                                                                                                                                                                                  |      |                                                                                                                                      |     | Self-efficacy (ITT analysis, according to Stanford Arthritis Self-Efficacy Scale (SES), score 0-100, higher score reflects higher self-efficacy)        | Change from BL until 6W | 13.3 (16.4)            | 8.2 (20.0)                              | 5.1 (16.4)                         | 7.7%                                     | p=0.106 (p=0.015 in protocol completers) | 0.28                                               |                                                                                                                                                                                                                                                                                                                                             |                                                                                                                                                                                            | High                                                 |  |
| Uneker, 2001; Long term follow-up of Beil et al                                    | RCT                  | Patients with active RA (150)                                             | NR                                       | 7.5Y                         | Self-efficacy (according to Stanford Arthritis Self-Efficacy Scale (SES), score 0-100, higher score reflects higher self-efficacy): 49.2                                                                                                                                             |                                                                                                                                   |                                                                                                                                                                     | RA knowledge (according to Rheumatoid Arthritis Knowledge Questionnaire (RAKQ), score 0-31, higher score reflects higher knowledge): 15.8                                                                                                                                                                                                                                                                                                | Education and exercise program consisting of >3 visits of 3 hours of physical therapy                                                                                                                                                                                                                                                                                            | 76   | Wait list                                                                                                                            | 74  | Self-efficacy (according to Stanford Arthritis Self-Efficacy Scale (SES), score 0-100, higher score reflects higher self-efficacy)                      | 52W                     | NR                     | NR                                      |                                    |                                          |                                          |                                                    | p<0.001 (MANOVA comparing BL, 12W and 52)                                                                                                                                                                                                                                                                                                   |                                                                                                                                                                                            | High                                                 |  |
| Breedband, 2011                                                                    | RCT                  | RA patients (34)                                                          | DA528 3.0                                | 8.0Y                         | Self-reported health status (according to ASES (Arthritis Self-Efficacy Scale), score 1-5, higher score reflects higher self-efficacy) 3.22; Self-efficacy function (according to ASES (Arthritis Self-Efficacy Scale), score 1-5, higher score reflects higher self-efficacy): 4.11 |                                                                                                                                   |                                                                                                                                                                     | Self-reported health status (according to Arthritis Impact Measurement Scales-2 (AIMS2), score 0-10, higher score reflects lower health status): 2.35; Self-reported health status social interaction (according to Arthritis Impact Measurement Scales-2 (AIMS2), score 0-10, higher score reflects lower social interaction): 3.39                                                                                                     | Group therapy: physical exercise designed to increase aerobic capacity and muscle strength together with an educational program to improve health status and self-efficacy                                                                                                                                                                                                       | 19   | Waiting list                                                                                                                         | 15  | Self-efficacy function (according to ASES (Arthritis Self-Efficacy Scale), score 1-5, higher score reflects higher self-efficacy)                       | 9W                      | 4.32 (0.74)            | 4.31 (0.87)                             | 0.01 (0.13)                        | 0.012                                    |                                          |                                                    |                                                                                                                                                                                                                                                                                                                                             | High                                                                                                                                                                                       |                                                      |  |
|                                                                                    |                      |                                                                           |                                          |                              |                                                                                                                                                                                                                                                                                      |                                                                                                                                   |                                                                                                                                                                     |                                                                                                                                                                                                                                                                                                                                                                                                                                          |                                                                                                                                                                                                                                                                                                                                                                                  |      |                                                                                                                                      |     | Self-efficacy function (according to ASES (Arthritis Self-Efficacy Scale), score 1-5, higher score reflects higher self-efficacy)                       | Change from BL until 9W | 0.29 (0.57)            | 0.10 (0.38)                             | 0.19 (0.28)                        | p=0.24                                   | 0.39                                     |                                                    |                                                                                                                                                                                                                                                                                                                                             | High                                                                                                                                                                                       |                                                      |  |
|                                                                                    |                      |                                                                           |                                          |                              |                                                                                                                                                                                                                                                                                      |                                                                                                                                   |                                                                                                                                                                     |                                                                                                                                                                                                                                                                                                                                                                                                                                          |                                                                                                                                                                                                                                                                                                                                                                                  |      |                                                                                                                                      |     | Self-efficacy pain (other symptoms) (according to ASES (Arthritis Self-Efficacy Scale), score 1-5, higher score reflects higher self-efficacy)          | Change from BL until 9W | 3.54 (0.88)            | 3.63 (0.85)                             | -0.09 (0.07)                       | 0.10                                     |                                          |                                                    |                                                                                                                                                                                                                                                                                                                                             | High                                                                                                                                                                                       |                                                      |  |
|                                                                                    |                      |                                                                           |                                          |                              |                                                                                                                                                                                                                                                                                      |                                                                                                                                   |                                                                                                                                                                     |                                                                                                                                                                                                                                                                                                                                                                                                                                          |                                                                                                                                                                                                                                                                                                                                                                                  |      |                                                                                                                                      |     | Self-efficacy pain (other symptoms) (according to ASES (Arthritis Self-Efficacy Scale), score 1-5, higher score reflects higher self-efficacy)          | Change from BL until 9W | 0.42 (0.71)            | 0.28 (0.85)                             | 0.14 (0.14)                        | p=0.47                                   | 0.18                                     |                                                    |                                                                                                                                                                                                                                                                                                                                             | High                                                                                                                                                                                       |                                                      |  |
| Difrenzo, 2018                                                                     | SR: 5 RCTs           | RA patients (399)                                                         | NR                                       | NR                           | NR                                                                                                                                                                                                                                                                                   |                                                                                                                                   |                                                                                                                                                                     |                                                                                                                                                                                                                                                                                                                                                                                                                                          | Mindfulness/vitality training program                                                                                                                                                                                                                                                                                                                                            | (#1) | Wait-list/cognitive behavioural therapy/education                                                                                    | NR  | Self-efficacy at 12M according to Arthritis Self-Efficacy Scale                                                                                         | 12M                     |                        |                                         |                                    |                                          |                                          |                                                    | Significant treatment effect favouring vitality training program; Conclusion: There are few trials evaluating the effect of mindfulness based interventions on outcomes in patients with RA. Preliminary findings suggest that mindfulness-based interventions may be a useful strategy to improve psychological distress in those with RA. | Low                                                                                                                                                                                        | Moderate-High                                        |  |
| Feldhusen, 2016                                                                    | RCT                  | RA patients with DAS28-3.8, VAS-fatigue >50 and disease duration >3Y (70) | NR                                       | 12.9Y                        | Arthritis Self-efficacy Scale (ASES), score 0-100, higher scores reflect higher self-efficacy: 59.8                                                                                                                                                                                  | Anxiety (HADS, score 0-21, higher score reflects higher anxiety): 6.0                                                             | Depression (HADS, score 0-21, higher score reflects higher depression): 6.4                                                                                         |                                                                                                                                                                                                                                                                                                                                                                                                                                          | Tailored health-enhancing physical activity and balancing life activities to guide participants in managing their fatigue: starting with individual person-centred meeting during which a self-care plan was developed, then follow-up meetings/phone contacts according to each participant's preferences with a physical therapist, who supported and coached each participant | 36   | Usual care                                                                                                                           | 34  | Arthritis Self-efficacy Scale (post-intervention, ASES, score 0-100, higher scores reflect higher self-efficacy)                                        | 6W                      | 68.7 (15.8)            | 60.0 (16.9)                             | 8.7 (15.8)                         | 0.53                                     |                                          |                                                    |                                                                                                                                                                                                                                                                                                                                             | High                                                                                                                                                                                       |                                                      |  |
|                                                                                    |                      |                                                                           |                                          |                              |                                                                                                                                                                                                                                                                                      |                                                                                                                                   |                                                                                                                                                                     |                                                                                                                                                                                                                                                                                                                                                                                                                                          |                                                                                                                                                                                                                                                                                                                                                                                  |      |                                                                                                                                      |     | Arthritis Self-efficacy Scale (post-intervention, ASES, score 0-100, higher scores reflect higher self-efficacy)                                        | 7.4 (15.2)              | 1.5 (12.3)             | 0.01 (0.12)                             | p=0.099                            | 0.43                                     |                                          |                                                    | High                                                                                                                                                                                                                                                                                                                                        |                                                                                                                                                                                            |                                                      |  |
| Hammond, 2004                                                                      | RCT                  | RA patients (328)                                                         | NR                                       | 9.5M                         | Self-efficacy score (according to Arthritis Self-Efficacy Scale (ASES), score 0-100, higher scores reflect higher self-efficacy): 63.23                                                                                                                                              |                                                                                                                                   |                                                                                                                                                                     | Affect scale (according to Arthritis Impact Measurement Scale version 2, score 0-100, higher scores reflect better function): 4.13; Helplessness (according to Rheumatoid Attitudes Index, score 0-30, higher scores reflect worse helplessness): 16.71; Perceived control (according to Rheumatoid Attitudes Index, score 0-30, higher scores reflect poorer sense of internal control): 18.13; No of doctor visits for arthritis: 3.05 | Occupational therapy: Five sessions: four 1h individual treatments and one 2h group arthritis education program, with additional sessions if needed                                                                                                                                                                                                                              | 162  | Usual care                                                                                                                           | 164 | Self-efficacy score (according to Arthritis Self-Efficacy Scale (ASES), score 0-100, higher scores reflect higher self-efficacy)                        | Change from BL until 6M | 4.62 (95%CI 2.21-7.04) | 3.41 (95%CI 1.12-5.71)                  | 1.21 (1.33)                        | p=0.47                                   |                                          |                                                    |                                                                                                                                                                                                                                                                                                                                             | High                                                                                                                                                                                       |                                                      |  |
| Iversen, 2010                                                                      | SR: 30 RCTs          | RA patients (731 (45, only RA patients))                                  | NR                                       | NR                           | NR                                                                                                                                                                                                                                                                                   |                                                                                                                                   |                                                                                                                                                                     |                                                                                                                                                                                                                                                                                                                                                                                                                                          | Self-management interventions: educational, behavioural and cognitive approaches to influence health knowledge, attitudes, beliefs and behaviours to promote independence, maintain or adjust life roles, and address the psychological impact of diseases                                                                                                                       | #4   | Same intervention without partner/visual care/information booklets/lifestyle management for arthritis programme/Self-help guide only | NR  | Self-efficacy                                                                                                                                           | NR                      |                        |                                         |                                    |                                          |                                          |                                                    | Short-term benefits were found in four studies. Three had longer term follow-up at 12 months, but only two showed benefits.                                                                                                                                                                                                                 | Moderate                                                                                                                                                                                   | Low-moderate                                         |  |
| Kettle, 2015                                                                       | RCT                  | RA patients (78)                                                          | NR                                       | NR                           | Self-efficacy physical activity (according to 18-item questionnaire from Bandura et al (2006), score 0-180, higher scores reflect higher self-efficacy): 81.2                                                                                                                        | Depressive symptoms (according to BSI (Brief Symptom Inventory), score 0-4, higher scores reflect more depressive symptoms): 0.30 | Autonomous motivation (according to three items from the Treatment Self-Regulation Questionnaire, score 0-7, higher scores reflect more autonomous motivation): 5.6 |                                                                                                                                                                                                                                                                                                                                                                                                                                          | Group-based education session led by a physical therapist and two self-regulation coaching sessions from a rheumatology nurse                                                                                                                                                                                                                                                    | 38   | Group-based education session led by a physical therapist                                                                            | 40  | Self-efficacy physical activity (according to 18-item questionnaire from Bandura et al (2006), score 0-180, higher scores reflect higher self-efficacy) | 8W                      | 92.8 (37.7)            | 78.8 (40.4)                             | 14.0 (37.3)                        |                                          |                                          |                                                    |                                                                                                                                                                                                                                                                                                                                             | Effect size (Cohen's d): 0.49; p=0.008 (main effects of group x time interaction based on repeated measures mixed ANOVAs adjusted for age, gender, and baseline level of disease activity) | High                                                 |  |

|                         |                               |                         |           |        |                                                                                                                                                                                                                                                                                                                                                                                                                                                                                                                                                                                                                                                                                                                                                                                                                                                                                                                                                                                                                                                                                                                                                                                                                                                                                                                                                                                               |                                                                                                                                                                                                                                                                                                                                                                                                                                                                                                                                                                                                                                                                                                                               |                                                          |                                                                      |                 |                                                                                                                                                                                                                                                                                                                          |                                                                                                                                                                                      |                        |                       |         |                                                                                                                                                                                                                                                                                                                                                                                                                                                                                                                           |                            |      |
|-------------------------|-------------------------------|-------------------------|-----------|--------|-----------------------------------------------------------------------------------------------------------------------------------------------------------------------------------------------------------------------------------------------------------------------------------------------------------------------------------------------------------------------------------------------------------------------------------------------------------------------------------------------------------------------------------------------------------------------------------------------------------------------------------------------------------------------------------------------------------------------------------------------------------------------------------------------------------------------------------------------------------------------------------------------------------------------------------------------------------------------------------------------------------------------------------------------------------------------------------------------------------------------------------------------------------------------------------------------------------------------------------------------------------------------------------------------------------------------------------------------------------------------------------------------|-------------------------------------------------------------------------------------------------------------------------------------------------------------------------------------------------------------------------------------------------------------------------------------------------------------------------------------------------------------------------------------------------------------------------------------------------------------------------------------------------------------------------------------------------------------------------------------------------------------------------------------------------------------------------------------------------------------------------------|----------------------------------------------------------|----------------------------------------------------------------------|-----------------|--------------------------------------------------------------------------------------------------------------------------------------------------------------------------------------------------------------------------------------------------------------------------------------------------------------------------|--------------------------------------------------------------------------------------------------------------------------------------------------------------------------------------|------------------------|-----------------------|---------|---------------------------------------------------------------------------------------------------------------------------------------------------------------------------------------------------------------------------------------------------------------------------------------------------------------------------------------------------------------------------------------------------------------------------------------------------------------------------------------------------------------------------|----------------------------|------|
| Loft, 2008              | RCT                           | RA patients (144)       | NR        | NR     | NR                                                                                                                                                                                                                                                                                                                                                                                                                                                                                                                                                                                                                                                                                                                                                                                                                                                                                                                                                                                                                                                                                                                                                                                                                                                                                                                                                                                            | Internet-based Arthritis Self-Management Program (focused on education of pain and improvement of function, participants were asked to log on at least 3 times for a total of 1-2h and to participate in the weekly activities)                                                                                                                                                                                                                                                                                                                                                                                                                                                                                               | 72                                                       | Usual care                                                           | 72              | Self-efficacy (follow-up according to ASES, score 10-100, BL until 1Y)                                                                                                                                                                                                                                                   | 0.783 (1.32)                                                                                                                                                                         | 0.242 (1.59)           | p=0.282               | 0.37    | High                                                                                                                                                                                                                                                                                                                                                                                                                                                                                                                      |                            |      |
| Manning, 2014           | RCT                           | RA patients (108)       | DA528 5.1 | 20M    | Self-efficacy pain (according to ASES, score 10-100, higher score reflects higher self-efficacy): 58.4; Self-efficacy function (according to ASES, score 10-100, higher score reflects higher self-efficacy): 63.2; Self-efficacy symptoms (according to ASES, score 10-100, higher score reflects higher self-efficacy): 61.7                                                                                                                                                                                                                                                                                                                                                                                                                                                                                                                                                                                                                                                                                                                                                                                                                                                                                                                                                                                                                                                                | Education, Self-Management, and Upper Extremity Exercise Training in People with Rheumatoid Arthritis (EXTRA) program (4 supervised groups delivered twice weekly, starting with an interactive discussion/lecture, followed by an exercise warm-up, personalised exercise circuit and exercise cool-down; thereafter, participants were asked to perform the exercises at home for another 10W)                                                                                                                                                                                                                                                                                                                              | 52                                                       | Usual care                                                           | 56              | Self-efficacy pain (according to ASES, score 10-100, higher score reflects higher self-efficacy)<br><br>Self-efficacy function (according to ASES, score 10-100, higher score reflects higher self-efficacy)<br><br>Self-efficacy symptoms (according to ASES, score 10-100, higher score reflects higher self-efficacy) | 4.8 (95%CI -3.1- 12.8)                                                                                                                                                               | -5.7 (95%CI -13.2-8.8) | 10.5 (95%CI 1.6-19.5) | p=0.021 | High                                                                                                                                                                                                                                                                                                                                                                                                                                                                                                                      |                            |      |
| Srikanesan, 2019        | SIR: 6 RCTs                   | RA patients (567)       | NR        | NR     | NR                                                                                                                                                                                                                                                                                                                                                                                                                                                                                                                                                                                                                                                                                                                                                                                                                                                                                                                                                                                                                                                                                                                                                                                                                                                                                                                                                                                            | Web-based rehabilitation                                                                                                                                                                                                                                                                                                                                                                                                                                                                                                                                                                                                                                                                                                      | #2                                                       | Waiting list/usual care                                              | NR              | Self-efficacy according to Arthritis Self-efficacy Scale                                                                                                                                                                                                                                                                 | 6W-10W                                                                                                                                                                               |                        |                       |         | Significant treatment effect favouring intervention on short-term, medium-term and long-term. Conclusion: The effects of web-based rehabilitation interventions on pain, function, quality of life, self-efficacy, rheumatoid arthritis knowledge, and physical activity are uncertain because of the very low-quality of evidence mostly from small single trials. Adverse effects were not reported. Large, well-designed trials are needed to evaluate the clinical and cost-effectiveness of web-based rehabilitation | Low                        | High |
| Skj, 2004               | nRCT                          | RA patients (45)        | NR        | 85.73M | Self-management behavior - Exercise (subscale of self-management behavior questionnaire, range 0-NR, higher score reflects NR); 5.33; Self-management behavior - Cognitive symptom management (subscale of self-management behavior questionnaire, range 0-5, higher score reflects NR); 1.53; Self-management behavior - Mental stress management (subscale of self-management behavior questionnaire, range 1-3, higher score reflects NR); 1.42; Self-management behavior - Use of community services (subscale of self-management behavior questionnaire, range 0-1, higher score reflects NR); 1.89; Self-management behavior - Use of education services/support groups for health problems (subscale of self-management behavior questionnaire, range 1-6, higher score reflects NR); 2.26; Self-management behavior - Use of organised exercise programs (subscale of self-management behavior questionnaire, range 1-4, higher score reflects NR); 1.09; Self-management behavior - Communication with physician (subscale of self-management behavior questionnaire, range 0-5, higher score reflects NR); 1.91; Self-efficacy - Perform self-management behaviors (subscale of self-efficacy questionnaire, range 1-10, higher score reflects NR); 5.33; Self-efficacy - Manage disease in general (subscale of self-efficacy questionnaire, range 1-10, higher score reflects NR) | Community rehabilitation service: 1) orientation phase (2-4W, orientation program and hospital visits/home visits to provide information about disease, alleviate helplessness, re-establish and facilitate social contact and promote readiness for change); 2) intervention phase (2-3M, stress management group, self-help course and water exercise class to acquire self-management strategies, enhance self-efficacy and strengthen and expand social network); 3) consolidation phase (6M, re-union meetings and volunteer training program to reinforce and monitor self-efficacy, self-management strategies, cultivate social support and encourage mutual help and facilitate self-acceptance and self-worthiness) | 29                                                       | Usual care (patients who decided not to join the intervention group) | 16              | Self-efficacy - Perform self-management behaviors (follow-up, subscale of self-efficacy questionnaire, range 1-10, higher score reflects NR)                                                                                                                                                                             | 9M                                                                                                                                                                                   | 6.87 (1.2)             | 5.98 (1.56)           | p=0.000 | 0.67                                                                                                                                                                                                                                                                                                                                                                                                                                                                                                                      | High                       |      |
|                         |                               |                         |           |        |                                                                                                                                                                                                                                                                                                                                                                                                                                                                                                                                                                                                                                                                                                                                                                                                                                                                                                                                                                                                                                                                                                                                                                                                                                                                                                                                                                                               | Web-based rehabilitation                                                                                                                                                                                                                                                                                                                                                                                                                                                                                                                                                                                                                                                                                                      | #1                                                       | Waiting list                                                         | NR              | Self-efficacy at short-term according to Arthritis Self-efficacy Scale                                                                                                                                                                                                                                                   | 10W                                                                                                                                                                                  | 15.4 (6.73-24.07)      |                       |         |                                                                                                                                                                                                                                                                                                                                                                                                                                                                                                                           | adjusted by baseline value |      |
|                         |                               |                         |           |        |                                                                                                                                                                                                                                                                                                                                                                                                                                                                                                                                                                                                                                                                                                                                                                                                                                                                                                                                                                                                                                                                                                                                                                                                                                                                                                                                                                                               | Web-based rehabilitation                                                                                                                                                                                                                                                                                                                                                                                                                                                                                                                                                                                                                                                                                                      | #1                                                       | Waiting list                                                         | NR              | Self-efficacy at medium-term according to Arthritis Self-efficacy Scale                                                                                                                                                                                                                                                  | 10W                                                                                                                                                                                  | 15.5 (7.13-23.87)      |                       |         |                                                                                                                                                                                                                                                                                                                                                                                                                                                                                                                           | adjusted by baseline value |      |
|                         |                               |                         |           |        |                                                                                                                                                                                                                                                                                                                                                                                                                                                                                                                                                                                                                                                                                                                                                                                                                                                                                                                                                                                                                                                                                                                                                                                                                                                                                                                                                                                               | Web-based rehabilitation                                                                                                                                                                                                                                                                                                                                                                                                                                                                                                                                                                                                                                                                                                      | #1                                                       | Usual care                                                           | NR              | Self-efficacy at long-term according to Arthritis Self-efficacy Scale                                                                                                                                                                                                                                                    | 6W                                                                                                                                                                                   | 0.54 (0.06-1.02)       |                       |         |                                                                                                                                                                                                                                                                                                                                                                                                                                                                                                                           | adjusted by baseline value |      |
| Education               |                               |                         |           |        |                                                                                                                                                                                                                                                                                                                                                                                                                                                                                                                                                                                                                                                                                                                                                                                                                                                                                                                                                                                                                                                                                                                                                                                                                                                                                                                                                                                               |                                                                                                                                                                                                                                                                                                                                                                                                                                                                                                                                                                                                                                                                                                                               |                                                          |                                                                      |                 |                                                                                                                                                                                                                                                                                                                          |                                                                                                                                                                                      |                        |                       |         |                                                                                                                                                                                                                                                                                                                                                                                                                                                                                                                           |                            |      |
| Albano, 2010            | SIR: 7 SIRs, 10RCTs, 20 nRCTs | RA patients (9955)      | NR        | NR     | NR                                                                                                                                                                                                                                                                                                                                                                                                                                                                                                                                                                                                                                                                                                                                                                                                                                                                                                                                                                                                                                                                                                                                                                                                                                                                                                                                                                                            | Educational programs (aiming at increasing knowledge and improving performance) and psycho-educational programs (combining teaching intervention activities to improve coping and change behaviour)                                                                                                                                                                                                                                                                                                                                                                                                                                                                                                                           | #12                                                      | NR                                                                   | NR              | Self-efficacy                                                                                                                                                                                                                                                                                                            | NR                                                                                                                                                                                   |                        |                       |         | Improvement in 11 studies; no improvement in 1 study; Conclusion: A large number of studies still assess the positive effects of therapeutic patient education. Nowadays, the problems of short-term efficacy of therapeutic patient education and the cultural and social barriers to this practice have become a major issue for research                                                                                                                                                                               | Moderate                   | High |
| Barlow, 1998            | RCT                           | RA patients (108)       | NR        | 15.85Y | Self-efficacy pain (ASE pain, score 0-50, higher score reflects higher self-efficacy): 20.17; Self-efficacy other (ASE-other, score 0-60, higher scores reflect higher self-efficacy): 30.47; T                                                                                                                                                                                                                                                                                                                                                                                                                                                                                                                                                                                                                                                                                                                                                                                                                                                                                                                                                                                                                                                                                                                                                                                               | Anxiety (HADS, score 0-21, higher score reflects higher anxiety): 8.33; Depression (WADS, score 0-21, higher score reflects higher depression): 6.63; Total knowledge score (self-developed, score 40 to +40, higher score reflects higher knowledge): 15.98                                                                                                                                                                                                                                                                                                                                                                                                                                                                  | Provision of general information on RA in leaflet format | 53                                                                   | No intervention | 55                                                                                                                                                                                                                                                                                                                       | Self-efficacy pain (ASE pain, score 0-50, higher scores reflect higher self-efficacy)<br><br>Self-efficacy other (ASE-other, score 0-60, higher scores reflect higher self-efficacy) | 2.79 (9.47)            | 1.13 (9.78)           | p=0.199 | 0.17                                                                                                                                                                                                                                                                                                                                                                                                                                                                                                                      | High                       |      |
| Hosseini Moghadam, 2018 | RCT                           | Female RA patients (64) | NR        | NR     | Self-efficacy (according to omitted ASES (arthritis self-efficacy scale), score 0-33, higher scores reflect higher self-efficacy): 15.33                                                                                                                                                                                                                                                                                                                                                                                                                                                                                                                                                                                                                                                                                                                                                                                                                                                                                                                                                                                                                                                                                                                                                                                                                                                      | Group education program: two 30min sessions per week                                                                                                                                                                                                                                                                                                                                                                                                                                                                                                                                                                                                                                                                          | 32                                                       | Usual care                                                           | 32              | Self-efficacy (according to omitted ASES (arthritis self-efficacy scale), score 0-33, higher scores reflect higher self-efficacy)                                                                                                                                                                                        | 8W                                                                                                                                                                                   | 21.18 (5.10)           | 14.34 (5.98)          | p<0.001 | 1.23                                                                                                                                                                                                                                                                                                                                                                                                                                                                                                                      | High                       |      |

|                                        |            |                                                                                                                                              |            |        |                                                                                                                                                                                                                                                                                                                       |                                                                                                                                                                                                                                                                                                                                                                                                                         |                                                                                                                                                                    |                                                                                                                                                                                                                                                                     |                                                                                                                                                         |                                                                                                                                                                                                                                                                                        |                                                                 |                                                                                                                         |                                                                                                                                      |             |                                                                                                                                                                                                                                                                                                                                                                                                                                                                                                                                                                                                                                                                                                                                                                                                                                                                                                                                                                                                                                                                                                                                                                                                            |                         |              |                                                                                                                                              |                                                                           |                                                                 |              |                                                                                                                                    |      |                                                     |
|----------------------------------------|------------|----------------------------------------------------------------------------------------------------------------------------------------------|------------|--------|-----------------------------------------------------------------------------------------------------------------------------------------------------------------------------------------------------------------------------------------------------------------------------------------------------------------------|-------------------------------------------------------------------------------------------------------------------------------------------------------------------------------------------------------------------------------------------------------------------------------------------------------------------------------------------------------------------------------------------------------------------------|--------------------------------------------------------------------------------------------------------------------------------------------------------------------|---------------------------------------------------------------------------------------------------------------------------------------------------------------------------------------------------------------------------------------------------------------------|---------------------------------------------------------------------------------------------------------------------------------------------------------|----------------------------------------------------------------------------------------------------------------------------------------------------------------------------------------------------------------------------------------------------------------------------------------|-----------------------------------------------------------------|-------------------------------------------------------------------------------------------------------------------------|--------------------------------------------------------------------------------------------------------------------------------------|-------------|------------------------------------------------------------------------------------------------------------------------------------------------------------------------------------------------------------------------------------------------------------------------------------------------------------------------------------------------------------------------------------------------------------------------------------------------------------------------------------------------------------------------------------------------------------------------------------------------------------------------------------------------------------------------------------------------------------------------------------------------------------------------------------------------------------------------------------------------------------------------------------------------------------------------------------------------------------------------------------------------------------------------------------------------------------------------------------------------------------------------------------------------------------------------------------------------------------|-------------------------|--------------|----------------------------------------------------------------------------------------------------------------------------------------------|---------------------------------------------------------------------------|-----------------------------------------------------------------|--------------|------------------------------------------------------------------------------------------------------------------------------------|------|-----------------------------------------------------|
| Mollard, 2018                          | RCT        | RA patients (36)                                                                                                                             | NR         | NR     | Self-efficacy (according to P-SIMS (Patient-Reported Outcomes Measurement Information System Self-Efficacy Managing Symptoms), score NR, higher score reflects NR); 47.2. Self-efficacy (according to PAM (Patient Activation Measure), score NR, higher score reflects higher self-efficacy); 70.6                   | Usage of the liveWithArthritis mobile app (supports self-management behaviour with features to monitor and manage the variables associated with RA, e.g. pain, treatment, other lifestyle and environmental data). App can provide reports that might help to identify aspect of patient lifestyle that make their arthritis better or worse and lets patients compare effectiveness of different treatment strategies) | 21                                                                                                                                                                 | Usual care                                                                                                                                                                                                                                                          | 15                                                                                                                                                      | Self-efficacy (according to P-SIMS (Patient-Reported Outcomes Measurement Information System Self-Efficacy Managing Symptoms), score NR, higher score reflects NR) Self-efficacy (according to PAM (Patient Activation Measure), score NR, higher score reflects higher self-efficacy) | Change from BL until 6M                                         | 2.80                                                                                                                    | -1.66                                                                                                                                | p=0.04      | High                                                                                                                                                                                                                                                                                                                                                                                                                                                                                                                                                                                                                                                                                                                                                                                                                                                                                                                                                                                                                                                                                                                                                                                                       |                         |              |                                                                                                                                              |                                                                           |                                                                 |              |                                                                                                                                    |      |                                                     |
|                                        |            |                                                                                                                                              |            |        |                                                                                                                                                                                                                                                                                                                       |                                                                                                                                                                                                                                                                                                                                                                                                                         |                                                                                                                                                                    |                                                                                                                                                                                                                                                                     |                                                                                                                                                         |                                                                                                                                                                                                                                                                                        |                                                                 |                                                                                                                         |                                                                                                                                      |             |                                                                                                                                                                                                                                                                                                                                                                                                                                                                                                                                                                                                                                                                                                                                                                                                                                                                                                                                                                                                                                                                                                                                                                                                            | Change from BL until 6M | 6.37         | 2.30                                                                                                                                         | p=0.46                                                                    |                                                                 |              |                                                                                                                                    |      |                                                     |
| Niedermann, 2011                       | RCT        | RA patients with difficulties and/or pain in hands that justified occupational therapy (53)                                                  | DAS28 3.71 | 9.25Y  | Joint Protection Self-Efficacy (according to JP-SES, score 0-30, higher score reflects higher self-efficacy); 16.41. Arthritis self-efficacy (according to ASES-D, score 0-10, higher score reflects higher self-efficacy); 6.82                                                                                      | Anxiety (according to HADS-A (Hospital Anxiety and Depression Scale - Anxiety subscale), score 0-21, higher score reflects higher level of anxiety); 5.60                                                                                                                                                                                                                                                               | Depression (according to HADS-D (Hospital Anxiety and Depression Scale - Depression subscale), score 0-21, higher score reflects higher level of depression); 4.79 | Joint protection education according to Pictorial Representation of Illness and Self Measure (PRISM): a brief interactive hands-on tool, requiring simple instructions and little time: five 45min sessions, four over a 3W period and one booster session 2M later | 26                                                                                                                                                      | Conventional joint protection                                                                                                                                                                                                                                                          | 27                                                              | Arthritis self-efficacy post-intervention (according to JP-SES, score 0-30, higher score reflects higher self-efficacy) | 3M                                                                                                                                   | 7.49 (1.34) | 6.20 (6.13)                                                                                                                                                                                                                                                                                                                                                                                                                                                                                                                                                                                                                                                                                                                                                                                                                                                                                                                                                                                                                                                                                                                                                                                                | p=0.015                 | 0.29         | High                                                                                                                                         |                                                                           |                                                                 |              |                                                                                                                                    |      |                                                     |
|                                        |            |                                                                                                                                              |            |        |                                                                                                                                                                                                                                                                                                                       |                                                                                                                                                                                                                                                                                                                                                                                                                         |                                                                                                                                                                    |                                                                                                                                                                                                                                                                     |                                                                                                                                                         |                                                                                                                                                                                                                                                                                        |                                                                 |                                                                                                                         |                                                                                                                                      |             |                                                                                                                                                                                                                                                                                                                                                                                                                                                                                                                                                                                                                                                                                                                                                                                                                                                                                                                                                                                                                                                                                                                                                                                                            |                         |              |                                                                                                                                              | 3M                                                                        | 21.64 (3.91)                                                    | 19.32 (4.01) | p=0.047                                                                                                                            | 0.59 |                                                     |
| Niedermann, 2012 (long-term follow-up) | RCT        | RA patients with difficulties and/or pain in hands that justified occupational therapy (53)                                                  | DAS28 3.71 | 9.25Y  | Joint Protection Self-Efficacy (according to JP-SES, score 0-30, higher score reflects higher self-efficacy); 16.41. Arthritis self-efficacy (according to ASES-D, score 0-10, higher score reflects higher self-efficacy); 6.82                                                                                      | Anxiety (according to HADS-A (Hospital Anxiety and Depression Scale - Anxiety subscale), score 0-21, higher score reflects higher level of anxiety); 5.60                                                                                                                                                                                                                                                               | Depression (according to HADS-D (Hospital Anxiety and Depression Scale - Depression subscale), score 0-21, higher score reflects higher level of depression); 4.79 | Joint protection education according to Pictorial Representation of Illness and Self Measure (PRISM): a brief interactive hands-on tool, requiring simple instructions and little time: five 45min sessions, four over a 3W period and one booster session 2M later | 26                                                                                                                                                      | Conventional joint protection                                                                                                                                                                                                                                                          | 27                                                              | Arthritis self-efficacy at follow-up (according to JP-SES, score 0-30, higher score reflects higher self-efficacy)      | Change from BL until 12M                                                                                                             | -0.1 (2.0)  | -0.5 (1.6)                                                                                                                                                                                                                                                                                                                                                                                                                                                                                                                                                                                                                                                                                                                                                                                                                                                                                                                                                                                                                                                                                                                                                                                                 | p=0.38                  | 0.22         | High                                                                                                                                         |                                                                           |                                                                 |              |                                                                                                                                    |      |                                                     |
|                                        |            |                                                                                                                                              |            |        |                                                                                                                                                                                                                                                                                                                       |                                                                                                                                                                                                                                                                                                                                                                                                                         |                                                                                                                                                                    |                                                                                                                                                                                                                                                                     |                                                                                                                                                         |                                                                                                                                                                                                                                                                                        |                                                                 |                                                                                                                         |                                                                                                                                      |             |                                                                                                                                                                                                                                                                                                                                                                                                                                                                                                                                                                                                                                                                                                                                                                                                                                                                                                                                                                                                                                                                                                                                                                                                            |                         |              |                                                                                                                                              | Change from BL until 12M                                                  | 3.3 (6.9)                                                       | 1.9 (5.2)    | p=0.38                                                                                                                             | 0.23 |                                                     |
| Riemsma, 1997                          | RCT        | RA patients (216)                                                                                                                            | NR         | 13.35Y | Self-efficacy - pain (according to ASES (Arthritis Self-efficacy Scale), score 10-100, higher score reflects higher self-efficacy); 3.12. Self-efficacy - function (according to ASES (Arthritis Self-efficacy Scale), score 10-100, higher score reflects higher self-efficacy); 3.63 (3.54 vs 3.88 vs 3.45, p<0.05) | Anxiety (according to subscale of Dutch Arthritis Impact Measurement Scales (AIMS)); 3.69                                                                                                                                                                                                                                                                                                                               | Depression (according to subscale of Dutch Arthritis Impact Measurement Scales (AIMS)); 2.99 (2.99 vs 2.45 vs 3.34, p<0.05)                                        | RA Knowledge (self-developed questionnaire, score 0-10, higher score reflects higher knowledge); 6.50                                                                                                                                                               | Individual program for education under guidance of their regular providers of health care whose activities were coordinated through arthritis passports | 69                                                                                                                                                                                                                                                                                     | Usual care                                                      | 72                                                                                                                      | Self-efficacy - pain (according to ASES (Arthritis Self-efficacy Scale), score 10-100, higher score reflects higher self-efficacy)   | 7M          | 3.22                                                                                                                                                                                                                                                                                                                                                                                                                                                                                                                                                                                                                                                                                                                                                                                                                                                                                                                                                                                                                                                                                                                                                                                                       | 2.94                    | ns           |                                                                                                                                              |                                                                           |                                                                 |              |                                                                                                                                    |      |                                                     |
|                                        |            |                                                                                                                                              |            |        |                                                                                                                                                                                                                                                                                                                       |                                                                                                                                                                                                                                                                                                                                                                                                                         |                                                                                                                                                                    |                                                                                                                                                                                                                                                                     |                                                                                                                                                         |                                                                                                                                                                                                                                                                                        |                                                                 |                                                                                                                         |                                                                                                                                      |             |                                                                                                                                                                                                                                                                                                                                                                                                                                                                                                                                                                                                                                                                                                                                                                                                                                                                                                                                                                                                                                                                                                                                                                                                            |                         |              | Self-efficacy - function (according to ASES (Arthritis Self-efficacy Scale), score 10-100, higher score reflects higher self-efficacy)       | 7M                                                                        | 3.52                                                            | 3.31         | ns                                                                                                                                 |      |                                                     |
|                                        |            |                                                                                                                                              |            |        |                                                                                                                                                                                                                                                                                                                       |                                                                                                                                                                                                                                                                                                                                                                                                                         |                                                                                                                                                                    |                                                                                                                                                                                                                                                                     |                                                                                                                                                         |                                                                                                                                                                                                                                                                                        |                                                                 |                                                                                                                         |                                                                                                                                      |             |                                                                                                                                                                                                                                                                                                                                                                                                                                                                                                                                                                                                                                                                                                                                                                                                                                                                                                                                                                                                                                                                                                                                                                                                            |                         |              | Self-efficacy - other symptoms (according to ASES (Arthritis Self-efficacy Scale), score 10-100, higher score reflects higher self-efficacy) | 7M                                                                        | 3.75                                                            | 3.51         | ns                                                                                                                                 |      |                                                     |
|                                        |            |                                                                                                                                              |            |        |                                                                                                                                                                                                                                                                                                                       |                                                                                                                                                                                                                                                                                                                                                                                                                         |                                                                                                                                                                    |                                                                                                                                                                                                                                                                     |                                                                                                                                                         |                                                                                                                                                                                                                                                                                        |                                                                 |                                                                                                                         |                                                                                                                                      |             |                                                                                                                                                                                                                                                                                                                                                                                                                                                                                                                                                                                                                                                                                                                                                                                                                                                                                                                                                                                                                                                                                                                                                                                                            |                         |              | Educational information without further guidance                                                                                             | 75                                                                        | Usual care                                                      | 72           | Self-efficacy - pain (according to ASES (Arthritis Self-efficacy Scale), score 10-100, higher score reflects higher self-efficacy) | 7M   | 3.45                                                |
|                                        |            |                                                                                                                                              |            |        |                                                                                                                                                                                                                                                                                                                       |                                                                                                                                                                                                                                                                                                                                                                                                                         |                                                                                                                                                                    |                                                                                                                                                                                                                                                                     |                                                                                                                                                         |                                                                                                                                                                                                                                                                                        |                                                                 |                                                                                                                         |                                                                                                                                      |             |                                                                                                                                                                                                                                                                                                                                                                                                                                                                                                                                                                                                                                                                                                                                                                                                                                                                                                                                                                                                                                                                                                                                                                                                            |                         |              |                                                                                                                                              |                                                                           |                                                                 |              |                                                                                                                                    |      |                                                     |
| <b>Psychological interventions</b>     |            |                                                                                                                                              |            |        |                                                                                                                                                                                                                                                                                                                       |                                                                                                                                                                                                                                                                                                                                                                                                                         |                                                                                                                                                                    |                                                                                                                                                                                                                                                                     |                                                                                                                                                         |                                                                                                                                                                                                                                                                                        |                                                                 |                                                                                                                         |                                                                                                                                      |             |                                                                                                                                                                                                                                                                                                                                                                                                                                                                                                                                                                                                                                                                                                                                                                                                                                                                                                                                                                                                                                                                                                                                                                                                            |                         |              |                                                                                                                                              |                                                                           |                                                                 |              |                                                                                                                                    |      |                                                     |
| Hewlett, 2011                          | RCT        | RA patients scoring < 26 for fatigue during the past week (Visual Analogue Scale, 0-10, higher score reflects higher level of fatigue) (127) | NR         | 14.0Y  | Self-efficacy (according to RASE (Rheumatoid Arthritis Self-efficacy scale), score 28-140, higher scores reflect more self-efficacy); 104.8                                                                                                                                                                           | Anxiety (HADS (Hospital Anxiety and Depression Scale), score 0-21, higher score reflects higher anxiety); 8.7 (4.7)                                                                                                                                                                                                                                                                                                     | Depression (HADS (Hospital Anxiety and Depression Scale), score 0-21, higher score reflects higher depression); 7.1 (3.7)                                          | Helplessness (according to AH (Arthritis Helplessness index), score 5-30, higher scores reflect higher helplessness); 17.9 (4.8)                                                                                                                                    | Cognitive behavioural therapy for fatigue self-management: 6 weekly sessions of 2h, 1 consolidation session at W14                                      | 65                                                                                                                                                                                                                                                                                     | Fatigue information: 1h didactic group session                  | 62                                                                                                                      | Self-efficacy (according to RASE (Rheumatoid Arthritis Self-Efficacy scale), score 28-140, higher scores reflect more self-efficacy) | 18W         | 112.12 (21.33)                                                                                                                                                                                                                                                                                                                                                                                                                                                                                                                                                                                                                                                                                                                                                                                                                                                                                                                                                                                                                                                                                                                                                                                             | 104.16 (12.66)          | p=0.042      | 0.45                                                                                                                                         | Adjusted difference: 6.74 (95%CI 0.24-13.25), adjusted for baseline score | High                                                            |              |                                                                                                                                    |      |                                                     |
| Prothro, 2018                          | SIR: 9 50% | RA patients (10782)                                                                                                                          | NR         | NR     | NR                                                                                                                                                                                                                                                                                                                    | NR                                                                                                                                                                                                                                                                                                                                                                                                                      | NR                                                                                                                                                                 | NR                                                                                                                                                                                                                                                                  | Psychological interventions                                                                                                                             | #2                                                                                                                                                                                                                                                                                     | Wait-list/usual care/attention SIB, 8 placebo/education studies | NR                                                                                                                      | Self-efficacy                                                                                                                        | NR          | Astin et al. (2002) reported that psychological interventions had a moderate effect on self-efficacy post-intervention which was reduced to non-significance at follow-up (average 8.5 months). Niedermann et al. reported that only 1 of the psychosocial intervention studies included self-efficacy as an outcome measure. The study, which examined the effectiveness of an stress management program, found significant improvements post-intervention and at 15-month follow-up. Small post-intervention improvements in patient global assessment, functional disability, pain, fatigue, anxiety and depression were observed. The effect on coping, self-efficacy and physical activity was greater. Improvements in depression, coping and physical activity were maintained (8-54 months). Conclusions: Psychological interventions result in small to moderate improvements in biopsychosocial outcomes for patients with rheumatoid arthritis in addition to those achieved by standard care. Several priorities for future research were identified, including determining the cost effectiveness of non-psychologically trained health professionals delivering psychological interventions. | Low                     | Low/moderate |                                                                                                                                              |                                                                           |                                                                 |              |                                                                                                                                    |      |                                                     |
|                                        |            |                                                                                                                                              |            |        |                                                                                                                                                                                                                                                                                                                       |                                                                                                                                                                                                                                                                                                                                                                                                                         |                                                                                                                                                                    |                                                                                                                                                                                                                                                                     |                                                                                                                                                         |                                                                                                                                                                                                                                                                                        |                                                                 |                                                                                                                         |                                                                                                                                      |             |                                                                                                                                                                                                                                                                                                                                                                                                                                                                                                                                                                                                                                                                                                                                                                                                                                                                                                                                                                                                                                                                                                                                                                                                            |                         |              | Psychological interventions                                                                                                                  | #1                                                                        | Wait-list/usual care/attention SIB, 5 placebo/education studies | NR           | Self-efficacy post-intervention                                                                                                    | NR   | Pooled effect size: 0.35 (95%CI 0.11-0.59, p=0.017) |
|                                        |            |                                                                                                                                              |            |        |                                                                                                                                                                                                                                                                                                                       |                                                                                                                                                                                                                                                                                                                                                                                                                         |                                                                                                                                                                    |                                                                                                                                                                                                                                                                     |                                                                                                                                                         |                                                                                                                                                                                                                                                                                        |                                                                 |                                                                                                                         |                                                                                                                                      |             |                                                                                                                                                                                                                                                                                                                                                                                                                                                                                                                                                                                                                                                                                                                                                                                                                                                                                                                                                                                                                                                                                                                                                                                                            |                         |              | Psychological interventions                                                                                                                  | #1                                                                        | Wait-list/usual care/attention SIB, 3 placebo/education studies | NR           | Self-efficacy after follow-up                                                                                                      | NR   | Pooled effect size: 0.20 (95%CI -0.08-0.48, p=ns)   |
| <b>Other interventions</b>             |            |                                                                                                                                              |            |        |                                                                                                                                                                                                                                                                                                                       |                                                                                                                                                                                                                                                                                                                                                                                                                         |                                                                                                                                                                    |                                                                                                                                                                                                                                                                     |                                                                                                                                                         |                                                                                                                                                                                                                                                                                        |                                                                 |                                                                                                                         |                                                                                                                                      |             |                                                                                                                                                                                                                                                                                                                                                                                                                                                                                                                                                                                                                                                                                                                                                                                                                                                                                                                                                                                                                                                                                                                                                                                                            |                         |              |                                                                                                                                              |                                                                           |                                                                 |              |                                                                                                                                    |      |                                                     |







|                                                                                    |                                      |                               |    |                             |                                                                                                                                                                                                                                                                                                                                                                                                                                           |                                                                                                                                             |                                                                                                                                                                 |                                                                                                                                                                                                                                                                                                    |     |                                                  |     |                             |                              |                                                                                                                                                                                                                                                                                                                                                                                                                                                                                                                                                                                                                                                                                                                                                                                                                                                                                                                                                                                                                                                                                                                                                                                                                                                                                                                                                                                                                                                                                    |          |              |
|------------------------------------------------------------------------------------|--------------------------------------|-------------------------------|----|-----------------------------|-------------------------------------------------------------------------------------------------------------------------------------------------------------------------------------------------------------------------------------------------------------------------------------------------------------------------------------------------------------------------------------------------------------------------------------------|---------------------------------------------------------------------------------------------------------------------------------------------|-----------------------------------------------------------------------------------------------------------------------------------------------------------------|----------------------------------------------------------------------------------------------------------------------------------------------------------------------------------------------------------------------------------------------------------------------------------------------------|-----|--------------------------------------------------|-----|-----------------------------|------------------------------|------------------------------------------------------------------------------------------------------------------------------------------------------------------------------------------------------------------------------------------------------------------------------------------------------------------------------------------------------------------------------------------------------------------------------------------------------------------------------------------------------------------------------------------------------------------------------------------------------------------------------------------------------------------------------------------------------------------------------------------------------------------------------------------------------------------------------------------------------------------------------------------------------------------------------------------------------------------------------------------------------------------------------------------------------------------------------------------------------------------------------------------------------------------------------------------------------------------------------------------------------------------------------------------------------------------------------------------------------------------------------------------------------------------------------------------------------------------------------------|----------|--------------|
| <b>Prothero, 2018</b>                                                              | SIR: 9<br>SIR:                       | RA patients (10782)           | NR | NR                          | NR                                                                                                                                                                                                                                                                                                                                                                                                                                        | Psychological interventions                                                                                                                 | #5<br>SIR:<br>28<br>studies                                                                                                                                     | Wait-list/usual care/attention placebo/education                                                                                                                                                                                                                                                   | NR  | Depression                                       | NR  |                             |                              | Aslin et al. (2002) and Knittle et al. (2010) found that psychological interventions resulted in small reductions in depression post intervention. Aslin et al. (2002) tested this effect at follow up averaged 8.5 months which remained significant. Reema et al. (2003) found that behaviour change interventions led to small reductions in depression which were not maintained at follow up (3-14 months), however, a trend favouring behaviour change interventions was observed. Beltman et al. (2010) and Cramp et al. (2013) found that patients in 2 out of the 3 randomized controlled trials included in their reviews (both testing cognitive behavioural therapy) showed a significant reduction in depressive symptoms post intervention. The third study in the review by Cramp et al. (2013) tested the effectiveness of group education and had no significant effects in relation to depression. The third study in the review by Beltman et al. (2010) (also testing cognitive behavioural therapy) reported an increase in depressive symptoms post intervention. Conclusion: Small post intervention improvements in patient global assessment, functional disability, pain, fatigue, anxiety and depression were observed. The effect on coping, self-efficacy and physical activity was greater. Improvements in depression. Pooled effect size: 0.15 (95%CI: -0.01 - 0.31, p=0.03); 0.14 (95%CI: -0.25 - 0.04, p=0.009); 0.23 (95%CI: 0.06-0.39, p=0.01) | Low      | Low-moderate |
|                                                                                    |                                      |                               |    |                             |                                                                                                                                                                                                                                                                                                                                                                                                                                           | Psychological interventions                                                                                                                 | #3<br>SIR:<br>44<br>studies                                                                                                                                     | Wait-list/usual care/attention placebo/education                                                                                                                                                                                                                                                   | NR  | Depression post-intervention                     | NR  |                             |                              |                                                                                                                                                                                                                                                                                                                                                                                                                                                                                                                                                                                                                                                                                                                                                                                                                                                                                                                                                                                                                                                                                                                                                                                                                                                                                                                                                                                                                                                                                    |          |              |
|                                                                                    |                                      |                               |    |                             |                                                                                                                                                                                                                                                                                                                                                                                                                                           | Psychological interventions                                                                                                                 | #2<br>SIR:<br>18<br>studies                                                                                                                                     | Wait-list/usual care/attention placebo/education                                                                                                                                                                                                                                                   | NR  | Depression after follow-up                       | NR  |                             |                              |                                                                                                                                                                                                                                                                                                                                                                                                                                                                                                                                                                                                                                                                                                                                                                                                                                                                                                                                                                                                                                                                                                                                                                                                                                                                                                                                                                                                                                                                                    |          |              |
| <b>Other interventions</b>                                                         |                                      |                               |    |                             |                                                                                                                                                                                                                                                                                                                                                                                                                                           |                                                                                                                                             |                                                                                                                                                                 |                                                                                                                                                                                                                                                                                                    |     |                                                  |     |                             |                              |                                                                                                                                                                                                                                                                                                                                                                                                                                                                                                                                                                                                                                                                                                                                                                                                                                                                                                                                                                                                                                                                                                                                                                                                                                                                                                                                                                                                                                                                                    |          |              |
| <b>Barisk, 2010</b>                                                                | RCT                                  | RA patients (168)             | NR | 13.4Y                       | Self-care (according to AIMS-2 (Arthritis Impact Measurement Scale), score 1-5, higher score reflects higher disability): 0.59; higher score reflects higher level of anxiety): 6.1;                                                                                                                                                                                                                                                      | Anxiety (according to Rand Mental Health Inventory (MH), score 0-20, higher score reflects higher level of anxiety): 6.1;                   | Depression (according to Rand Mental Health Inventory (MH), score 0-20, higher score reflects higher level of depression): 4.9                                  | Cognitive-behaviour therapy: 12 sessions of 60-75min during 8-12W to help patients develop effective coping strategies, enhance self-efficacy and personal control, and modify maladaptive behaviors that maintain symptoms and disability, followed by a monthly booster telephone call           | 68  | All 3 groups were compared with each other       | 12M | 4.8 (0.47)                  |                              |                                                                                                                                                                                                                                                                                                                                                                                                                                                                                                                                                                                                                                                                                                                                                                                                                                                                                                                                                                                                                                                                                                                                                                                                                                                                                                                                                                                                                                                                                    |          |              |
|                                                                                    |                                      |                               |    |                             |                                                                                                                                                                                                                                                                                                                                                                                                                                           |                                                                                                                                             |                                                                                                                                                                 | Relaxation response training: 8 sessions of 50-60min during 8-12W, including psycho-physiological and cognitive aspects, diaphragmatic breathing, progressive muscle relaxation, generalization of relaxation response skills to symptoms management, followed by a monthly booster telephone call | 44  |                                                  | 12M | 4.5 (0.60)                  |                              |                                                                                                                                                                                                                                                                                                                                                                                                                                                                                                                                                                                                                                                                                                                                                                                                                                                                                                                                                                                                                                                                                                                                                                                                                                                                                                                                                                                                                                                                                    |          |              |
|                                                                                    |                                      |                               |    |                             |                                                                                                                                                                                                                                                                                                                                                                                                                                           |                                                                                                                                             |                                                                                                                                                                 | Arthritis education: 8 sessions of 50min during 8-12W including talks and printed material about RA and its treatment, followed by a monthly booster telephone call                                                                                                                                | 56  |                                                  | 12M | 4.3 (0.55)                  |                              |                                                                                                                                                                                                                                                                                                                                                                                                                                                                                                                                                                                                                                                                                                                                                                                                                                                                                                                                                                                                                                                                                                                                                                                                                                                                                                                                                                                                                                                                                    |          |              |
|                                                                                    |                                      |                               |    |                             |                                                                                                                                                                                                                                                                                                                                                                                                                                           |                                                                                                                                             |                                                                                                                                                                 |                                                                                                                                                                                                                                                                                                    |     |                                                  | 12M | -0.29 (0.36)                | Between groups: p=0.95       |                                                                                                                                                                                                                                                                                                                                                                                                                                                                                                                                                                                                                                                                                                                                                                                                                                                                                                                                                                                                                                                                                                                                                                                                                                                                                                                                                                                                                                                                                    |          |              |
|                                                                                    |                                      |                               |    |                             |                                                                                                                                                                                                                                                                                                                                                                                                                                           |                                                                                                                                             |                                                                                                                                                                 |                                                                                                                                                                                                                                                                                                    |     |                                                  | 12M | -0.48 (0.47)                | Between groups: p=0.95       |                                                                                                                                                                                                                                                                                                                                                                                                                                                                                                                                                                                                                                                                                                                                                                                                                                                                                                                                                                                                                                                                                                                                                                                                                                                                                                                                                                                                                                                                                    |          |              |
|                                                                                    |                                      |                               |    |                             |                                                                                                                                                                                                                                                                                                                                                                                                                                           |                                                                                                                                             |                                                                                                                                                                 |                                                                                                                                                                                                                                                                                                    |     |                                                  | 12M | -0.32 (0.41)                | Between groups: p=0.95       |                                                                                                                                                                                                                                                                                                                                                                                                                                                                                                                                                                                                                                                                                                                                                                                                                                                                                                                                                                                                                                                                                                                                                                                                                                                                                                                                                                                                                                                                                    |          |              |
| <b>Hewlett, 2005</b>                                                               | RCT                                  | RA patients (209)             | NR | 7.0-10.0Y, range of medians | Self-efficacy pain (according to ASES (arthritis self efficacy scale), score 10-100, higher scores reflect more self-efficacy): 50.0-58.0, range of medians; Self-efficacy function (according to ASES (arthritis self efficacy scale), score 10-100, higher scores reflect more self-efficacy): 62.2-67.3, range of medians; Self-efficacy other (according to ASES (arthritis self efficacy scale), score 10-100, higher scores reflect | Anxiety (according to HADS (Hospital Anxiety and Depression Scale), score 0-21, higher score reflects higher level of anxiety): 7.0, median | Depression (according to HADS (Hospital Anxiety and Depression Scale), score 0-21, higher score reflects higher level of depression): 4.5-5.0, range of medians | Helplessness (according to arthritis helplessness index subscale, score 5-30, high scores reflect more helplessness): 16.0-16.5, range of medians                                                                                                                                                  | 68  | Usual care (review initiated by rheumatologists) | 52  | 0 ( -1.0-3.0), median (IQR) | 0 ( -1.0-2.75), median (IQR) | p=0.80                                                                                                                                                                                                                                                                                                                                                                                                                                                                                                                                                                                                                                                                                                                                                                                                                                                                                                                                                                                                                                                                                                                                                                                                                                                                                                                                                                                                                                                                             | High     |              |
| <b>RA knowledge</b>                                                                |                                      |                               |    |                             |                                                                                                                                                                                                                                                                                                                                                                                                                                           |                                                                                                                                             |                                                                                                                                                                 |                                                                                                                                                                                                                                                                                                    |     |                                                  |     |                             |                              |                                                                                                                                                                                                                                                                                                                                                                                                                                                                                                                                                                                                                                                                                                                                                                                                                                                                                                                                                                                                                                                                                                                                                                                                                                                                                                                                                                                                                                                                                    |          |              |
| <b>Self-management programs (combination of non-pharmacological interventions)</b> |                                      |                               |    |                             |                                                                                                                                                                                                                                                                                                                                                                                                                                           |                                                                                                                                             |                                                                                                                                                                 |                                                                                                                                                                                                                                                                                                    |     |                                                  |     |                             |                              |                                                                                                                                                                                                                                                                                                                                                                                                                                                                                                                                                                                                                                                                                                                                                                                                                                                                                                                                                                                                                                                                                                                                                                                                                                                                                                                                                                                                                                                                                    |          |              |
| <b>Bel, 1998</b>                                                                   | RCT                                  | Patients with active RA (150) | NR | 7.5Y                        | Self-efficacy (according to Stanford Arthritis Self-Efficacy Scale (SES), score 0-100, higher score reflects higher self-efficacy): 49.2                                                                                                                                                                                                                                                                                                  |                                                                                                                                             |                                                                                                                                                                 | Education and exercise program consisting of >3 visits of 3 hours of physical therapy                                                                                                                                                                                                              | 76  | Wait list                                        | 74  | 18.5 (5.6)                  | 16.7 (5.0)                   | 0.34                                                                                                                                                                                                                                                                                                                                                                                                                                                                                                                                                                                                                                                                                                                                                                                                                                                                                                                                                                                                                                                                                                                                                                                                                                                                                                                                                                                                                                                                               | High     |              |
|                                                                                    |                                      |                               |    |                             |                                                                                                                                                                                                                                                                                                                                                                                                                                           |                                                                                                                                             |                                                                                                                                                                 |                                                                                                                                                                                                                                                                                                    |     |                                                  | 6W  | 2.8 (3.8)                   | 1.1 (3.5)                    | p=0.011                                                                                                                                                                                                                                                                                                                                                                                                                                                                                                                                                                                                                                                                                                                                                                                                                                                                                                                                                                                                                                                                                                                                                                                                                                                                                                                                                                                                                                                                            | 0.47     |              |
| <b>Uinelker, 2001, Long term follow-up of BeF et al</b>                            | RCT                                  | Patients with active RA (150) | NR | 7.5Y                        | Self-efficacy (according to Stanford Arthritis Self-Efficacy Scale (SES), score 0-100, higher score reflects higher self-efficacy): 49.2                                                                                                                                                                                                                                                                                                  |                                                                                                                                             |                                                                                                                                                                 | Education and exercise program consisting of >3 visits of 3 hours of physical therapy                                                                                                                                                                                                              | 76  | Wait list                                        | 74  | NR                          | NR                           | p<0.001 (MANOVA comparing BL, LW and SW)                                                                                                                                                                                                                                                                                                                                                                                                                                                                                                                                                                                                                                                                                                                                                                                                                                                                                                                                                                                                                                                                                                                                                                                                                                                                                                                                                                                                                                           | High     |              |
| <b>Education</b>                                                                   |                                      |                               |    |                             |                                                                                                                                                                                                                                                                                                                                                                                                                                           |                                                                                                                                             |                                                                                                                                                                 |                                                                                                                                                                                                                                                                                                    |     |                                                  |     |                             |                              |                                                                                                                                                                                                                                                                                                                                                                                                                                                                                                                                                                                                                                                                                                                                                                                                                                                                                                                                                                                                                                                                                                                                                                                                                                                                                                                                                                                                                                                                                    |          |              |
| <b>Albano, 2010</b>                                                                | SIR: 7<br>SIR:<br>10RCTs<br>20 nRCTs | RA patients (9955)            | NR | NR                          |                                                                                                                                                                                                                                                                                                                                                                                                                                           |                                                                                                                                             |                                                                                                                                                                 | Educational programs (aiming at increasing knowledge and improving performance) and psycho-educational programs (combining teaching intervention activities to improve coping and change behaviour)                                                                                                | #11 | NR                                               | NR  | Knowledge                   | NR                           | Improvement in all 11 studies; Conclusion: A large number of studies still assess the positive effects of therapeutic patient education. Nevertheless, the problems of short-term efficacy of therapeutic patient education and the cultural and social barriers to this practice have become a major issue for research                                                                                                                                                                                                                                                                                                                                                                                                                                                                                                                                                                                                                                                                                                                                                                                                                                                                                                                                                                                                                                                                                                                                                           | Moderate | High         |

|                            |           |                   |           |        |                                                                                                                                                                                                                                                                                                                                                                                                                                      |                                                                                                                           |                                                                                                                                |                                                                                                                                                                                                                                                                                                                                                                                                                                                                                                                                                                                                |                                                                                                                                                                                                                                                                                                    |            |                                            |                                                                                                                                          |                                                                                                                                                                         |                          |              |              |                        |      |                                                                                                                                                                                                                                                                                                                                                                                                                                                                                                                                                                                |     |      |
|----------------------------|-----------|-------------------|-----------|--------|--------------------------------------------------------------------------------------------------------------------------------------------------------------------------------------------------------------------------------------------------------------------------------------------------------------------------------------------------------------------------------------------------------------------------------------|---------------------------------------------------------------------------------------------------------------------------|--------------------------------------------------------------------------------------------------------------------------------|------------------------------------------------------------------------------------------------------------------------------------------------------------------------------------------------------------------------------------------------------------------------------------------------------------------------------------------------------------------------------------------------------------------------------------------------------------------------------------------------------------------------------------------------------------------------------------------------|----------------------------------------------------------------------------------------------------------------------------------------------------------------------------------------------------------------------------------------------------------------------------------------------------|------------|--------------------------------------------|------------------------------------------------------------------------------------------------------------------------------------------|-------------------------------------------------------------------------------------------------------------------------------------------------------------------------|--------------------------|--------------|--------------|------------------------|------|--------------------------------------------------------------------------------------------------------------------------------------------------------------------------------------------------------------------------------------------------------------------------------------------------------------------------------------------------------------------------------------------------------------------------------------------------------------------------------------------------------------------------------------------------------------------------------|-----|------|
| <b>Barlow, 1998</b>        | RCT       | RA patients (108) | NR        | 15.85Y | Self-efficacy pain (ASE-pain, score 0-50, higher scores reflect higher self-efficacy): 30.47; 7<br>Self-efficacy other (ASE-other, score 0-40, higher scores reflect higher self-efficacy): 30.47; 7                                                                                                                                                                                                                                 | Anxiety (HADS, score 0-21, higher score reflects higher anxiety): 8.33;                                                   | Depression (HADS, score 0-21, higher score reflects higher depression): 6.63;                                                  | Total knowledge score (self-developed, score 40 to 100, higher score reflects higher knowledge): 15.98                                                                                                                                                                                                                                                                                                                                                                                                                                                                                         | Provision of general information on RA in leaflet format                                                                                                                                                                                                                                           | 53         | No intervention                            | 55                                                                                                                                       | RA knowledge (self-developed, score 40 to 100, higher score reflects higher knowledge)                                                                                  | Change from BL until 2M  | 5.86 (8.65)  | 0.00 (4.69)  | p<0.0001               | 0.84 | High                                                                                                                                                                                                                                                                                                                                                                                                                                                                                                                                                                           |     |      |
| <b>Riemsma, 1997</b>       | RCT       | RA patients (216) | NR        | 13.35Y | Self-efficacy pain (according to ASES (Arthritis Self-Efficacy Scale), score 10-100, higher score reflects higher self-efficacy): 3.32; Self-efficacy function (according to ASES (Arthritis Self-Efficacy Scale), score 10-100, higher score reflects higher self-efficacy): 3.32; Self-efficacy other symptoms (according to ASES (Arthritis Self-Efficacy Scale), score 10-100, higher score reflects higher self-efficacy): 3.32 | Anxiety (according to subscale of Dutch Arthritis Impact Measurement Scales (AIMS)): 3.69                                 | Depression (according to subscale of Dutch Arthritis Impact Measurement Scales (AIMS)): 2.99 (2.99 vs 2.45 vs 3.34, p=0.09)    | RA Knowledge (self-developed questionnaire, score 0-10, higher score reflects higher knowledge): 6.50                                                                                                                                                                                                                                                                                                                                                                                                                                                                                          | Individual program for education under guidance of their regular providers of health care whose activities were coordinated through arthritis passports                                                                                                                                            | 69         | Usual care                                 | 72                                                                                                                                       | RA Knowledge (self-developed questionnaire, score 0-10, higher score reflects higher knowledge)                                                                         | Change from BL until 2M  | 5.82         | 5.21         | ns                     |      | High                                                                                                                                                                                                                                                                                                                                                                                                                                                                                                                                                                           |     |      |
|                            |           |                   |           |        |                                                                                                                                                                                                                                                                                                                                                                                                                                      |                                                                                                                           |                                                                                                                                |                                                                                                                                                                                                                                                                                                                                                                                                                                                                                                                                                                                                | Educational information without further guidance                                                                                                                                                                                                                                                   | 75         | Usual care                                 | 72                                                                                                                                       | RA Knowledge (self-developed questionnaire, score 0-10, higher score reflects higher knowledge)                                                                         | Change from BL until 2M  | 6.20         | 5.21         | ns                     |      | High                                                                                                                                                                                                                                                                                                                                                                                                                                                                                                                                                                           |     |      |
| <b>Other interventions</b> |           |                   |           |        |                                                                                                                                                                                                                                                                                                                                                                                                                                      |                                                                                                                           |                                                                                                                                |                                                                                                                                                                                                                                                                                                                                                                                                                                                                                                                                                                                                |                                                                                                                                                                                                                                                                                                    |            |                                            |                                                                                                                                          |                                                                                                                                                                         |                          |              |              |                        |      |                                                                                                                                                                                                                                                                                                                                                                                                                                                                                                                                                                                |     |      |
| <b>Srikanthan, 2019</b>    | SUR, RCTs | RA patients (567) | NR        | NR     | NR                                                                                                                                                                                                                                                                                                                                                                                                                                   |                                                                                                                           |                                                                                                                                |                                                                                                                                                                                                                                                                                                                                                                                                                                                                                                                                                                                                | Web-based rehabilitation                                                                                                                                                                                                                                                                           | #1         | No access to website                       | NR                                                                                                                                       | RA knowledge                                                                                                                                                            | 2M                       |              |              |                        |      | A significant effect was noted in patient RA knowledge in most of these comparisons favouring the intervention groups at both time points. Conclusion: The effects of web-based rehabilitation interventions on pain, function, quality of life, self-efficacy, rheumatoid arthritis knowledge, and physical activity are uncertain because of the very low-quality of evidence mostly from single trials. Adverse effects were not reported. Large, well-designed trials are needed to evaluate the clinical and cost-effectiveness of web-based rehabilitation interventions | Low | High |
| <b>Other outcomes</b>      |           |                   |           |        |                                                                                                                                                                                                                                                                                                                                                                                                                                      |                                                                                                                           |                                                                                                                                |                                                                                                                                                                                                                                                                                                                                                                                                                                                                                                                                                                                                |                                                                                                                                                                                                                                                                                                    |            |                                            |                                                                                                                                          |                                                                                                                                                                         |                          |              |              |                        |      |                                                                                                                                                                                                                                                                                                                                                                                                                                                                                                                                                                                |     |      |
| <b>Barsky, 2010</b>        | RCT       | RA patients (168) | NR        | 13.4Y  | Self-care (according to AIMS-2 (Arthritis Impact Measurement Scale), score 1-5, higher score reflects higher disability): 0.55;                                                                                                                                                                                                                                                                                                      | Anxiety (according to Rand Mental Health Inventory (MH), score 0-20, higher score reflects higher level of anxiety): 6.1; | Depression (according to Rand Mental Health Inventory (MH), score 0-20, higher score reflects higher level of depression): 4.9 |                                                                                                                                                                                                                                                                                                                                                                                                                                                                                                                                                                                                | Cognitive-behaviour therapy: 12 sessions of 60-75min during 8-12W to help patients develop effective coping strategies, enhance self-efficacy and personal control, and modify maladaptive behaviors that maintain symptoms and disability, followed by a monthly booster telephone call           | 68         | All 3 groups were compared with each other |                                                                                                                                          | Self-care (according to AIMS-2 (Arthritis Impact Measurement Scale), score 1-5, higher score reflects higher disability)                                                | Change from BL until 12M | +0.04 (0.17) |              | Between groups: p=0.16 |      | High                                                                                                                                                                                                                                                                                                                                                                                                                                                                                                                                                                           |     |      |
|                            |           |                   |           |        |                                                                                                                                                                                                                                                                                                                                                                                                                                      |                                                                                                                           |                                                                                                                                |                                                                                                                                                                                                                                                                                                                                                                                                                                                                                                                                                                                                | Relaxation response training: 8 sessions of 50-60min during 8-12W, including psycho-physiological and cognitive aspects, diaphragmatic breathing, progressive muscle relaxation, generalisation of relaxation response skills to symptoms management, followed by a monthly booster telephone call | 44         |                                            |                                                                                                                                          | Self-care (according to AIMS-2 (Arthritis Impact Measurement Scale), score 1-5, higher score reflects higher disability)                                                | Change from BL until 12M | 0.21 (0.09)  |              |                        |      | High                                                                                                                                                                                                                                                                                                                                                                                                                                                                                                                                                                           |     |      |
|                            |           |                   |           |        |                                                                                                                                                                                                                                                                                                                                                                                                                                      |                                                                                                                           |                                                                                                                                |                                                                                                                                                                                                                                                                                                                                                                                                                                                                                                                                                                                                | Arthritis education: 8 sessions of 50min during 8-12W including talks and printed material about RA and its treatment, followed by a monthly booster telephone call                                                                                                                                | 56         |                                            |                                                                                                                                          | Self-care (according to AIMS-2 (Arthritis Impact Measurement Scale), score 1-5, higher score reflects higher disability)                                                | Change from BL until 12M | -0.51 (0.22) |              | Between groups: p=0.16 |      | High                                                                                                                                                                                                                                                                                                                                                                                                                                                                                                                                                                           |     |      |
|                            |           |                   |           |        |                                                                                                                                                                                                                                                                                                                                                                                                                                      |                                                                                                                           |                                                                                                                                |                                                                                                                                                                                                                                                                                                                                                                                                                                                                                                                                                                                                |                                                                                                                                                                                                                                                                                                    |            |                                            |                                                                                                                                          | Self-care (according to AIMS-2 (Arthritis Impact Measurement Scale), score 1-5, higher score reflects higher disability)                                                | Change from BL until 12M | -0.20 (0.20) |              | Between groups: p=0.16 |      | High                                                                                                                                                                                                                                                                                                                                                                                                                                                                                                                                                                           |     |      |
| <b>Breedband, 2011</b>     | RCT       | RA patients (34)  | DAS28 3.0 | 8.0Y   | Self-efficacy pain+other symptoms (according to ASES (Arthritis Self-Efficacy Scale), score 1-5, higher score reflects higher): 3.22; Self-efficacy function (according to ASES (Arthritis Self-Efficacy Scale), score 1-5, higher score reflects higher): 4.11                                                                                                                                                                      |                                                                                                                           |                                                                                                                                | Self-reported health status psychological state (according to Arthritis Impact Measurement Scales-2 (AIMS2), score 0-10, higher score reflects lower health state): 2.35; Self-reported health status social interaction (according to Arthritis Impact Measurement Scales-2 (AIMS2), score 0-10, higher score reflects lower social interaction): 3.59                                                                                                                                                                                                                                        | Group therapy: physical exercise designed to increase aerobic capacity and muscle strength together with an education program to improve health status and self-efficacy                                                                                                                           | 19         | Waiting list                               | 15                                                                                                                                       | Self-reported health status psychological state (according to Arthritis Impact Measurement Scales-2 (AIMS2), score 0-10, higher score reflects lower health state)      | Change from BL until 9W  | 2.12 (1.58)  | 2.29 (1.31)  |                        | 0.12 | High                                                                                                                                                                                                                                                                                                                                                                                                                                                                                                                                                                           |     |      |
|                            |           |                   |           |        |                                                                                                                                                                                                                                                                                                                                                                                                                                      |                                                                                                                           |                                                                                                                                |                                                                                                                                                                                                                                                                                                                                                                                                                                                                                                                                                                                                |                                                                                                                                                                                                                                                                                                    |            |                                            |                                                                                                                                          | Self-reported health status psychological state (according to Arthritis Impact Measurement Scales-2 (AIMS2), score 0-10, higher score reflects lower health state)      | Change from BL until 9W  | -0.34 (1.11) | 0.08 (1.37)  | p=0.4                  | 0.34 | High                                                                                                                                                                                                                                                                                                                                                                                                                                                                                                                                                                           |     |      |
|                            |           |                   |           |        |                                                                                                                                                                                                                                                                                                                                                                                                                                      |                                                                                                                           |                                                                                                                                |                                                                                                                                                                                                                                                                                                                                                                                                                                                                                                                                                                                                |                                                                                                                                                                                                                                                                                                    |            |                                            |                                                                                                                                          | Self-reported health status social interaction (according to Arthritis Impact Measurement Scales-2 (AIMS2), score 0-10, higher score reflects lower social interaction) | Change from BL until 9W  | 3.26 (1.37)  | 2.52 (1.24)  |                        | 0.57 | High                                                                                                                                                                                                                                                                                                                                                                                                                                                                                                                                                                           |     |      |
|                            |           |                   |           |        |                                                                                                                                                                                                                                                                                                                                                                                                                                      |                                                                                                                           |                                                                                                                                |                                                                                                                                                                                                                                                                                                                                                                                                                                                                                                                                                                                                |                                                                                                                                                                                                                                                                                                    |            |                                            |                                                                                                                                          | Self-reported health status social interaction (according to Arthritis Impact Measurement Scales-2 (AIMS2), score 0-10, higher score reflects lower social interaction) | Change from BL until 9W  | -0.48 (1.90) | -0.88 (2.03) | p=0.6                  | 0.20 | High                                                                                                                                                                                                                                                                                                                                                                                                                                                                                                                                                                           |     |      |
| <b>el-Miedany, 2012</b>    | RCT       | RA patients (147) | NR        | 11.3Y  | Self-helplessness (according to the modified rheumatology attitudes index, range of score NR, higher score reflects higher helplessness): 9.2                                                                                                                                                                                                                                                                                        |                                                                                                                           |                                                                                                                                | Active group: After 6 months of usual care: discussion of treatment goals based on PICO's, education, joint fitness program (for patients aiming to a) give patients strategies and tools necessary to make daily decisions to cope with their disease; b) educate the patients about how to assess the main arthritis outcome measures regularly for their arthritis; c) help the patients to identify and manage the impact of arthritis on their personal life; d) show patients how to keep their muscles and joints fit; for health care professionals aiming to a) review the effects of | 74                                                                                                                                                                                                                                                                                                 | Usual care | 73                                         | Self-helplessness (according to the modified rheumatology attitudes index, range of score NR, higher score reflects higher helplessness) | Change from BL until 18M                                                                                                                                                | 4.7 (0.4)                | 6.2 (0.2)    |              |                        | 4.74 | High                                                                                                                                                                                                                                                                                                                                                                                                                                                                                                                                                                           |     |      |
|                            |           |                   |           |        |                                                                                                                                                                                                                                                                                                                                                                                                                                      |                                                                                                                           |                                                                                                                                |                                                                                                                                                                                                                                                                                                                                                                                                                                                                                                                                                                                                |                                                                                                                                                                                                                                                                                                    |            |                                            |                                                                                                                                          | Self-helplessness (according to the modified rheumatology attitudes index, range of score NR, higher score reflects higher helplessness)                                | Change from BL until 18M | -4.7 (0.4)   | -3.1 (0.5)   | p<0.001                | 3.53 | High                                                                                                                                                                                                                                                                                                                                                                                                                                                                                                                                                                           |     |      |



|               |      |                                                                                                                                            |    |                             |                                                                                                                                                                                                                                                                                                                                                                                                                                                                                                                                                                                                                                                                                                                                                                                                                                                                                                                                                                                                                                                                                                                                                                                                                                                                                                                                                                                                                                                                                                                                                                                                                                                                                                                |                                                                                                                                                                                                                                                                                                                                                                                                                                                                                                                                                                                                                                                                                                                               |                                                                                                                                                                     |                                                                                                                                                   |                                                                                                                                                       |                                                                                                                                           |                                                                                                                                                                                                                                                                                                                                                                                                                                         |                                                                                                                                                                |                                                                                                                        |                           |                              |                               |                                                                                                                                                                                            |      |                                                                             |      |
|---------------|------|--------------------------------------------------------------------------------------------------------------------------------------------|----|-----------------------------|----------------------------------------------------------------------------------------------------------------------------------------------------------------------------------------------------------------------------------------------------------------------------------------------------------------------------------------------------------------------------------------------------------------------------------------------------------------------------------------------------------------------------------------------------------------------------------------------------------------------------------------------------------------------------------------------------------------------------------------------------------------------------------------------------------------------------------------------------------------------------------------------------------------------------------------------------------------------------------------------------------------------------------------------------------------------------------------------------------------------------------------------------------------------------------------------------------------------------------------------------------------------------------------------------------------------------------------------------------------------------------------------------------------------------------------------------------------------------------------------------------------------------------------------------------------------------------------------------------------------------------------------------------------------------------------------------------------|-------------------------------------------------------------------------------------------------------------------------------------------------------------------------------------------------------------------------------------------------------------------------------------------------------------------------------------------------------------------------------------------------------------------------------------------------------------------------------------------------------------------------------------------------------------------------------------------------------------------------------------------------------------------------------------------------------------------------------|---------------------------------------------------------------------------------------------------------------------------------------------------------------------|---------------------------------------------------------------------------------------------------------------------------------------------------|-------------------------------------------------------------------------------------------------------------------------------------------------------|-------------------------------------------------------------------------------------------------------------------------------------------|-----------------------------------------------------------------------------------------------------------------------------------------------------------------------------------------------------------------------------------------------------------------------------------------------------------------------------------------------------------------------------------------------------------------------------------------|----------------------------------------------------------------------------------------------------------------------------------------------------------------|------------------------------------------------------------------------------------------------------------------------|---------------------------|------------------------------|-------------------------------|--------------------------------------------------------------------------------------------------------------------------------------------------------------------------------------------|------|-----------------------------------------------------------------------------|------|
| Hammond, 2004 | RCT  | RA patients (328)                                                                                                                          | NR | 9.5M                        | Self-efficacy score (according to Arthritis Self-Efficacy Scale (ASES); score 0-100; higher scores reflect higher self-efficacy): 61.23                                                                                                                                                                                                                                                                                                                                                                                                                                                                                                                                                                                                                                                                                                                                                                                                                                                                                                                                                                                                                                                                                                                                                                                                                                                                                                                                                                                                                                                                                                                                                                        | Affect scale (according to Arthritis Impact Measurement Scale version 2, score 0-10; higher scores reflect better function): 4.13; Helplessness (according to Rheumatoid Attitudes Index; score 0-30; higher scores reflect worse helplessness): 16.71; Perceived control (according to Rheumatoid Attitudes Index; score 0-36; higher scores reflect poorer sense of internal control): 18.11; No of doctor visits for arthritis: 3.05                                                                                                                                                                                                                                                                                       | Occupational therapy: Five sessions: four 1h individual treatments and one 2h group arthritis education program, with additional sessions if needed                 | 162                                                                                                                                               | Usual care                                                                                                                                            | 164                                                                                                                                       | Affect scale (according to Arthritis Impact Measurement Scale version 2, score 0-10; higher scores reflect better function): 4.13; Helplessness (according to Rheumatoid Attitudes Index; score 0-30; higher scores reflect worse helplessness): 16.71; Perceived control (according to Rheumatoid Attitudes Index; score 0-36; higher scores reflect poorer sense of internal control): 18.11; No of doctor visits for arthritis: 3.05 | Change from BL until 6M                                                                                                                                        | -0.30 (95%CI -0.49 -0.12)                                                                                              | -0.18 (95%CI -0.36 -0.11) | p=0.36                       | High                          |                                                                                                                                                                                            |      |                                                                             |      |
|               |      |                                                                                                                                            |    |                             |                                                                                                                                                                                                                                                                                                                                                                                                                                                                                                                                                                                                                                                                                                                                                                                                                                                                                                                                                                                                                                                                                                                                                                                                                                                                                                                                                                                                                                                                                                                                                                                                                                                                                                                |                                                                                                                                                                                                                                                                                                                                                                                                                                                                                                                                                                                                                                                                                                                               |                                                                                                                                                                     |                                                                                                                                                   |                                                                                                                                                       |                                                                                                                                           | Change from BL until 6M                                                                                                                                                                                                                                                                                                                                                                                                                 | -1.32 (95%CI -2.05 -0.59)                                                                                                                                      | -0.97 (95%CI -1.71 -0.24)                                                                                              | p=0.51                    |                              |                               |                                                                                                                                                                                            |      |                                                                             |      |
|               |      |                                                                                                                                            |    |                             |                                                                                                                                                                                                                                                                                                                                                                                                                                                                                                                                                                                                                                                                                                                                                                                                                                                                                                                                                                                                                                                                                                                                                                                                                                                                                                                                                                                                                                                                                                                                                                                                                                                                                                                |                                                                                                                                                                                                                                                                                                                                                                                                                                                                                                                                                                                                                                                                                                                               |                                                                                                                                                                     |                                                                                                                                                   |                                                                                                                                                       |                                                                                                                                           | Change from BL until 6M                                                                                                                                                                                                                                                                                                                                                                                                                 | -1.08 (95%CI -1.96 -0.17)                                                                                                                                      | -1.05 (95%CI -1.83 -0.27)                                                                                              | p=0.96                    |                              |                               |                                                                                                                                                                                            |      |                                                                             |      |
|               |      |                                                                                                                                            |    |                             |                                                                                                                                                                                                                                                                                                                                                                                                                                                                                                                                                                                                                                                                                                                                                                                                                                                                                                                                                                                                                                                                                                                                                                                                                                                                                                                                                                                                                                                                                                                                                                                                                                                                                                                |                                                                                                                                                                                                                                                                                                                                                                                                                                                                                                                                                                                                                                                                                                                               |                                                                                                                                                                     |                                                                                                                                                   |                                                                                                                                                       |                                                                                                                                           | Change from BL until 6M                                                                                                                                                                                                                                                                                                                                                                                                                 | -0.48 (95%CI -0.83 -0.13)                                                                                                                                      | -0.58 (95%CI -0.95 -0.21)                                                                                              | p=0.70                    |                              |                               |                                                                                                                                                                                            |      |                                                                             |      |
|               |      |                                                                                                                                            |    |                             |                                                                                                                                                                                                                                                                                                                                                                                                                                                                                                                                                                                                                                                                                                                                                                                                                                                                                                                                                                                                                                                                                                                                                                                                                                                                                                                                                                                                                                                                                                                                                                                                                                                                                                                |                                                                                                                                                                                                                                                                                                                                                                                                                                                                                                                                                                                                                                                                                                                               |                                                                                                                                                                     |                                                                                                                                                   |                                                                                                                                                       |                                                                                                                                           | Change from BL until 6M                                                                                                                                                                                                                                                                                                                                                                                                                 | 0.5 (-3.0-3.0), median (IQR)                                                                                                                                   | 1.0 (-1.75-4.0), median (IQR)                                                                                          | p=0.20                    | High                         |                               |                                                                                                                                                                                            |      |                                                                             |      |
| Hewlett, 2005 | RCT  | RA patients (209)                                                                                                                          | NR | 7.0-10.0Y, range of medians | Self-efficacy pain (according to ASES (arthritis self-efficacy scale); score 10-100; higher scores reflect more self-efficacy): 50.0-58.0, range of medians; Self-efficacy function (according to ASES (arthritis self-efficacy scale); score 10-100; higher scores reflect more self-efficacy): 62.2-67.3, range of medians; Self-efficacy other (according to ASES (arthritis self-efficacy scale); score 10-100; higher scores reflect more self-efficacy): 70.0, median                                                                                                                                                                                                                                                                                                                                                                                                                                                                                                                                                                                                                                                                                                                                                                                                                                                                                                                                                                                                                                                                                                                                                                                                                                    | Anxiety (according to HADS (Hospital Anxiety and Depression Scale); score 0-21; higher score reflects higher level of anxiety): 7.0, median                                                                                                                                                                                                                                                                                                                                                                                                                                                                                                                                                                                   | Depression (according to HADS (Hospital Anxiety and Depression Scale); score 0-21; higher score reflects higher depression): 4.5-5.0, range of medians              | Helplessness (according to arthritis helplessness index subscale; score 5-30; high scores reflect more helplessness): 16.0-16.5, range of medians | Direct access to hospital review (rheumatologist, physiotherapist, occupational therapist) by patients with RA through a nurse-led telephone helpline | 68                                                                                                                                        | Usual care (review initiated by rheumatologists)                                                                                                                                                                                                                                                                                                                                                                                        | 52                                                                                                                                                             | Helplessness (according to arthritis helplessness index subscale; score 5-30; high scores reflect more helplessness)   | Change from BL until 6Y   | 0.5 (-3.0-3.0), median (IQR) | 1.0 (-1.75-4.0), median (IQR) | p=0.20                                                                                                                                                                                     | High |                                                                             |      |
| Hewlett, 2011 | RCT  | RA patients scoring <6 for fatigue during the past week (Visual Analogue Scale, 0-10; higher score reflects higher level of fatigue) (127) | NR | 14.0Y                       | Self-efficacy (according to RASE (Rheumatoid Arthritis Self-Efficacy Scale); score 28-140; higher scores reflect more self-efficacy): 104.8                                                                                                                                                                                                                                                                                                                                                                                                                                                                                                                                                                                                                                                                                                                                                                                                                                                                                                                                                                                                                                                                                                                                                                                                                                                                                                                                                                                                                                                                                                                                                                    | Anxiety (HADS (Hospital Anxiety and Depression Scale); score 0-21; higher score reflects higher anxiety): 8.7 (4.7)                                                                                                                                                                                                                                                                                                                                                                                                                                                                                                                                                                                                           | Depression (HADS (Hospital Anxiety and Depression Scale); score 0-21; higher score reflects higher depression): 7.1 (3.7)                                           | Helplessness (according to AHI (Arthritis Helplessness Index); score 5-30; higher scores reflects higher helplessness): 17.9 (4.8)                | Cognitive behavioural therapy for fatigue self-management: 8 weekly sessions of 2h, 1 consolidation session at 10w                                    | 65                                                                                                                                        | Fatigue information: 1h didactic group session                                                                                                                                                                                                                                                                                                                                                                                          | 62                                                                                                                                                             | Helplessness (according to AHI (Arthritis Helplessness Index); score 5-30; higher scores reflects higher helplessness) | 18W                       | 13.78 (4.23)                 | 18.27 (4.99)                  | p<0.001                                                                                                                                                                                    | 0.97 | Adjusted difference: -3.13 (95%CI -4.73 -1.53), adjusted for baseline score | High |
| Kiville, 2015 | RCT  | RA patients (78)                                                                                                                           | NR | NR                          | Self-efficacy physical activity (according to 18-item questionnaire from Bandura et al (2006); score 0-180; higher scores reflect higher self-efficacy): 83.2                                                                                                                                                                                                                                                                                                                                                                                                                                                                                                                                                                                                                                                                                                                                                                                                                                                                                                                                                                                                                                                                                                                                                                                                                                                                                                                                                                                                                                                                                                                                                  | Depressive symptoms (according to BDI (Brief Symptom Inventory); score 0-4; higher scores reflect more depressive symptoms): 0.30                                                                                                                                                                                                                                                                                                                                                                                                                                                                                                                                                                                             | Autonomous motivation (according to three items from the Treatment Self-Regulation Questionnaire; score 0-7; higher scores reflect more autonomous motivation): 5.6 | Education session plus a motivational interview from a physical therapist and two self-regulation coaching sessions from a rheumatology nurse     | 38                                                                                                                                                    | Group-based education session led by a physical therapist                                                                                 | 40                                                                                                                                                                                                                                                                                                                                                                                                                                      | Autonomous motivation (according to three items from the Treatment Self-Regulation Questionnaire; score 0-7; higher scores reflect more autonomous motivation) | 8W                                                                                                                     | 6.0 (0.8)                 | 5.2 (1.4)                    | 0.70                          | Effect size (Cohen's d): 0.26; p<0.001 (main effects of group x time interaction based on repeated measures mixed ANOVA, adjusted for age, gender, and baseline level of disease activity) | High |                                                                             |      |
| Lau, 2019     | RCT  | RA patients (21)                                                                                                                           | NR | NR                          | NR                                                                                                                                                                                                                                                                                                                                                                                                                                                                                                                                                                                                                                                                                                                                                                                                                                                                                                                                                                                                                                                                                                                                                                                                                                                                                                                                                                                                                                                                                                                                                                                                                                                                                                             | Coping (according to one question of Rheumatoid Arthritis Impact of Disease (RAID) questionnaire; score 0-10; higher scores reflect worse coping): 3.0                                                                                                                                                                                                                                                                                                                                                                                                                                                                                                                                                                        | Neural mobilization exercises (targeting the median, musculocutaneous, femoral and saphenous nerve, as well as entire nervous system), twice daily                  | 11                                                                                                                                                | Gentle joint mobilization exercises targeting the same joints                                                                                         | 10                                                                                                                                        | Coping (according to one question of Rheumatoid Arthritis Impact of Disease (RAID) questionnaire; score 0-10; higher scores reflect worse coping)                                                                                                                                                                                                                                                                                       | 4-8W                                                                                                                                                           | 1.64 (2.01)                                                                                                            | 2.50 (2.07)               | ns                           | 0.42                          | High                                                                                                                                                                                       |      |                                                                             |      |
| Shu, 2004     | nRCT | RA patients (45)                                                                                                                           | NR | 85.73M                      | Self-management behavior - Exercise (subscale of self-management behavior questionnaire, range 0-NR, higher score reflects NR); 5.33; Self-management behavior - Cognitive symptom management (subscale of self-management behavior questionnaire, range 0-5; higher score reflects NR); 1.53; Self-management behavior - Mental stress management (subscale of self-management behavior questionnaire, range 1-3; higher score reflects NR); 1.42; Self-management behavior - Use of community services (subscale of self-management behavior questionnaire, range 0-7; higher score reflects NR); 1.40; Self-management behavior - Use of community services for emotional support (subscale of self-management behavior questionnaire, range 0-1; higher score reflects NR); 1.89; Self-management behavior - Use of education services/support groups for health problems (subscale of self-management behavior questionnaire, range 1-6; higher score reflects NR); 1.26; Self-management behavior - Use of organized exercise programs (subscale of self-management behavior questionnaire, range 1-4; higher score reflects NR); 1.09; Self-management behavior - Communication with physician (subscale of self-management behavior questionnaire, range 0-5; higher score reflects NR); 1.91; Self-efficacy - Perform self-management behaviors (subscale of self-efficacy questionnaire, range 1-10; higher score reflects NR); 5.23; Self-efficacy - Manage disease in general (subscale of self-efficacy questionnaire, range 1-10; higher score reflects NR); 5.02; Self-efficacy - Achieve health outcomes (subscale of self-efficacy questionnaire, range 1-10; higher score reflects NR); 5.36 | Community rehabilitation services: 1) orientation phase (2-4w, orientation program and hospital visits/home visits to provide information about disease, alleviate helplessness, re-establish and facilitate social contact and promote readiness for change); 2) intervention phase (2-3M, stress management group, self-help course and water exercise class to acquire self-management strategies, enhance self-efficacy and strengthen and expand social network); 3) consolidation phase (6-10M, union meetings and volunteer training program to reinforce and monitor self-efficacy, self-management strategies, cultivate social support and encourage mutual help and facilitate self-acceptance as self-worthiness) | 29                                                                                                                                                                  | Usual care (patients who decided not to join the intervention group)                                                                              | 16                                                                                                                                                    | Self-management behavior - Exercise (follow-up, subscale of self-management behavior questionnaire, range 0-NR, higher score reflects NR) | 9M                                                                                                                                                                                                                                                                                                                                                                                                                                      | 8.34 (3.48)                                                                                                                                                    | 4.38 (2.13)                                                                                                            | p=0.000                   | 1.14                         | Adjusted by baseline value    | High                                                                                                                                                                                       |      |                                                                             |      |
|               |      |                                                                                                                                            |    |                             |                                                                                                                                                                                                                                                                                                                                                                                                                                                                                                                                                                                                                                                                                                                                                                                                                                                                                                                                                                                                                                                                                                                                                                                                                                                                                                                                                                                                                                                                                                                                                                                                                                                                                                                |                                                                                                                                                                                                                                                                                                                                                                                                                                                                                                                                                                                                                                                                                                                               |                                                                                                                                                                     |                                                                                                                                                   |                                                                                                                                                       |                                                                                                                                           | Self-management behavior - Cognitive symptom management (follow-up, subscale of self-management behavior questionnaire, range 0-5; higher score reflects NR)                                                                                                                                                                                                                                                                            | 9M                                                                                                                                                             | 2.50 (0.67)                                                                                                            | 1.57 (0.9)                | p=0.000                      | 1.39                          | Adjusted by baseline value                                                                                                                                                                 | High |                                                                             |      |
|               |      |                                                                                                                                            |    |                             |                                                                                                                                                                                                                                                                                                                                                                                                                                                                                                                                                                                                                                                                                                                                                                                                                                                                                                                                                                                                                                                                                                                                                                                                                                                                                                                                                                                                                                                                                                                                                                                                                                                                                                                |                                                                                                                                                                                                                                                                                                                                                                                                                                                                                                                                                                                                                                                                                                                               |                                                                                                                                                                     |                                                                                                                                                   |                                                                                                                                                       |                                                                                                                                           | Self-management behavior - Mental stress management (follow-up, subscale of self-management behavior questionnaire, range 1-3; higher score reflects NR)                                                                                                                                                                                                                                                                                | 9M                                                                                                                                                             | 1.69 (0.47)                                                                                                            | 1.56 (0.51)               | p=0.372                      | 0.28                          | Adjusted by baseline value                                                                                                                                                                 | High |                                                                             |      |
|               |      |                                                                                                                                            |    |                             |                                                                                                                                                                                                                                                                                                                                                                                                                                                                                                                                                                                                                                                                                                                                                                                                                                                                                                                                                                                                                                                                                                                                                                                                                                                                                                                                                                                                                                                                                                                                                                                                                                                                                                                |                                                                                                                                                                                                                                                                                                                                                                                                                                                                                                                                                                                                                                                                                                                               |                                                                                                                                                                     |                                                                                                                                                   |                                                                                                                                                       |                                                                                                                                           | Self-management behavior - Use of community services (follow-up, subscale of self-management behavior questionnaire, range 0-7; higher score reflects NR)                                                                                                                                                                                                                                                                               | 9M                                                                                                                                                             | 0.72 (1.33)                                                                                                            | 2.00 (2.22)               | p=0.010                      | 0.96                          | Adjusted by baseline value                                                                                                                                                                 | High |                                                                             |      |
|               |      |                                                                                                                                            |    |                             |                                                                                                                                                                                                                                                                                                                                                                                                                                                                                                                                                                                                                                                                                                                                                                                                                                                                                                                                                                                                                                                                                                                                                                                                                                                                                                                                                                                                                                                                                                                                                                                                                                                                                                                |                                                                                                                                                                                                                                                                                                                                                                                                                                                                                                                                                                                                                                                                                                                               |                                                                                                                                                                     |                                                                                                                                                   |                                                                                                                                                       |                                                                                                                                           | Self-management behavior - Use of community services for emotional support (follow-up, subscale of self-management behavior questionnaire, range 0-1; higher score reflects NR)                                                                                                                                                                                                                                                         | 9M                                                                                                                                                             | 1.86 (0.35)                                                                                                            | 1.94 (0.25)               | p=0.499                      | 0.23                          | Adjusted by baseline value                                                                                                                                                                 | High |                                                                             |      |
|               |      |                                                                                                                                            |    |                             |                                                                                                                                                                                                                                                                                                                                                                                                                                                                                                                                                                                                                                                                                                                                                                                                                                                                                                                                                                                                                                                                                                                                                                                                                                                                                                                                                                                                                                                                                                                                                                                                                                                                                                                |                                                                                                                                                                                                                                                                                                                                                                                                                                                                                                                                                                                                                                                                                                                               |                                                                                                                                                                     |                                                                                                                                                   |                                                                                                                                                       |                                                                                                                                           | Self-management behavior - Use of education services/support groups for health problems (follow-up, subscale of self-management behavior questionnaire, range 1-6; higher score reflects NR)                                                                                                                                                                                                                                            | 9M                                                                                                                                                             | 2.90 (1.29)                                                                                                            | 1.13 (0.34)               | p=0.000                      | 1.37                          | Adjusted by baseline value                                                                                                                                                                 | High |                                                                             |      |
|               |      |                                                                                                                                            |    |                             |                                                                                                                                                                                                                                                                                                                                                                                                                                                                                                                                                                                                                                                                                                                                                                                                                                                                                                                                                                                                                                                                                                                                                                                                                                                                                                                                                                                                                                                                                                                                                                                                                                                                                                                |                                                                                                                                                                                                                                                                                                                                                                                                                                                                                                                                                                                                                                                                                                                               |                                                                                                                                                                     |                                                                                                                                                   |                                                                                                                                                       |                                                                                                                                           | Self-management behavior - Use of organized exercise programs (follow-up, subscale of self-management behavior questionnaire, range 1-4; higher score reflects NR)                                                                                                                                                                                                                                                                      | 9M                                                                                                                                                             | 1.72 (0.7)                                                                                                             | 1.19 (0.75)               | p=0.000                      | 0.76                          | Adjusted by baseline value                                                                                                                                                                 | High |                                                                             |      |

| Author          | Year        | Study Design                  | Participants | Comparator | Intervention | Outcomes                                        | Effect Size | Significance                                                     | Interpretation | Quality                                                                                                                                                      |       |                      |                                                                  |                                                                                                                                                                                                                                                                                                                                                                                                                                                                                                                                                                                                                                                                                                                                                                                        |                                                                                                                                                                                                                                                                                                                                                                                                                                                                                                                                        |               |          |
|-----------------|-------------|-------------------------------|--------------|------------|--------------|-------------------------------------------------|-------------|------------------------------------------------------------------|----------------|--------------------------------------------------------------------------------------------------------------------------------------------------------------|-------|----------------------|------------------------------------------------------------------|----------------------------------------------------------------------------------------------------------------------------------------------------------------------------------------------------------------------------------------------------------------------------------------------------------------------------------------------------------------------------------------------------------------------------------------------------------------------------------------------------------------------------------------------------------------------------------------------------------------------------------------------------------------------------------------------------------------------------------------------------------------------------------------|----------------------------------------------------------------------------------------------------------------------------------------------------------------------------------------------------------------------------------------------------------------------------------------------------------------------------------------------------------------------------------------------------------------------------------------------------------------------------------------------------------------------------------------|---------------|----------|
| De Thurah, 2017 | SIR: 7 RCTs | RA patients (548 RA patients) | NR           | NR         | NR           | Nurse-led follow-up in managing disease control | 266         | Physician-led follow-up                                          | 271            | Self-management behavior - Communication with physician (follow-up, subscale of self-management behavior questionnaire, range 0-5, higher score reflects NR) | 9M    | 2.66 (0.9)           | 2.04 (1.05)                                                      | p<0.000, adjusted by baseline value                                                                                                                                                                                                                                                                                                                                                                                                                                                                                                                                                                                                                                                                                                                                                    | >0 favours nurse led follow-up. Conclusion: After 1 year no difference in disease activity, indicated by DAS28, were found between embedded nurse-led follow-up compared with conventional physician-led follow-up, in RA patients with low disease activity or remission. No difference was found in patient satisfaction after 1 year (standard mean difference [SMD] -0.17 [95% CI -1.0 to 0.67]), whereas a statistical significant difference in favour of nurse-led follow-up was seen after 2 years [SMD: -0.27 (-1.38 - 0.83)] | Low           | Moderate |
|                 |             |                               |              |            |              | Nurse-led follow-up in managing disease control | 123         | Physician-led follow-up                                          | 120            | Patient satisfaction, according to Leeds Satisfaction Scale or VAS confidence and satisfaction scale                                                         | 1Y    | -0.27 (-1.38 - 0.83) | >0 favours nurse led follow-up                                   | Low                                                                                                                                                                                                                                                                                                                                                                                                                                                                                                                                                                                                                                                                                                                                                                                    | Moderate-High                                                                                                                                                                                                                                                                                                                                                                                                                                                                                                                          |               |          |
| DiRenzo, 2018   | SIR: 5 RCTs | RA patients (399)             | NR           | NR         | NR           | Mindfulness/vitality training program           | #2          | Wait-list/cognitive behavioural therapy/education                | NR             | Psychological distress at 6-12M, according to General Health Questionnaire-20                                                                                | 6-12M |                      |                                                                  | Significant treatment effect favouring vitality training program                                                                                                                                                                                                                                                                                                                                                                                                                                                                                                                                                                                                                                                                                                                       | Low                                                                                                                                                                                                                                                                                                                                                                                                                                                                                                                                    | Moderate-High |          |
|                 |             |                               |              |            |              | Mindfulness/vitality training program           | #1          | Wait-list/cognitive behavioural therapy/education                | NR             | Emotional processing at 12M, according to Emotion Approach Coping Scale                                                                                      | 12M   |                      | Significant treatment effect favouring vitality training program | Low                                                                                                                                                                                                                                                                                                                                                                                                                                                                                                                                                                                                                                                                                                                                                                                    | Moderate-High                                                                                                                                                                                                                                                                                                                                                                                                                                                                                                                          |               |          |
|                 |             |                               |              |            |              | Mindfulness/vitality training program           | #2          | Wait-list/cognitive behavioural therapy/education                | NR             | Self-care ability at 12M (questionnaire/test not described)                                                                                                  | 12M   |                      | Significant treatment effect favouring vitality training program | Low                                                                                                                                                                                                                                                                                                                                                                                                                                                                                                                                                                                                                                                                                                                                                                                    | Moderate-High                                                                                                                                                                                                                                                                                                                                                                                                                                                                                                                          |               |          |
|                 |             |                               |              |            |              | Mindfulness/vitality training program           | #1          | Wait-list/cognitive behavioural therapy/education                | NR             | Psychological well-being at 6M (according to psychological well-being scale)                                                                                 | 6M    |                      | Significant treatment effect favouring mindfulness               | Low                                                                                                                                                                                                                                                                                                                                                                                                                                                                                                                                                                                                                                                                                                                                                                                    | Moderate-High                                                                                                                                                                                                                                                                                                                                                                                                                                                                                                                          |               |          |
| Prothero, 2018  | SIR: 9 SLRs | RA patients (10782)           | NR           | NR         | NR           | Psychological interventions                     | #2          | Wait-list/usual care/attention SLRs, placebo/education studies   | NR             | Coping                                                                                                                                                       | NR    |                      |                                                                  | Asin et al. (2003) reported that psychological interventions had a moderate effect on improvements in coping post intervention (d = 0.46; 95% CI: -0.09 - 0.83; P = 0.007). At follow-up (average 8.5 months) the effect size remained significant and had increased slightly (d = 0.52; 95% CI: -0.07 - 1.11; P = 0.04). Strong evidence for psychoeducational programmes was found by Weidemann et al. (2004) for coping with pain. All 4 psychoeducational programs (3 of which were high quality studies) showed at least 1 pain-coping behavior that improved significantly after intervention. There was, however, limited evidence for long-term increase of coping behaviour (averaged 50 months) because of inconsistent Pooled effect size: 0.46 [95% CI 0.09-0.83, p<0.007] | Low                                                                                                                                                                                                                                                                                                                                                                                                                                                                                                                                    | Low-moderate  |          |
|                 |             |                               |              |            |              | Psychological interventions                     | #1          | Wait-list/usual care/attention SLRs, 4 placebo/education studies | NR             | Coping post-intervention                                                                                                                                     | NR    |                      |                                                                  |                                                                                                                                                                                                                                                                                                                                                                                                                                                                                                                                                                                                                                                                                                                                                                                        |                                                                                                                                                                                                                                                                                                                                                                                                                                                                                                                                        |               |          |
|                 |             |                               |              |            |              | Psychological interventions                     | #1          | Wait-list/usual care/attention SLRs, 3 placebo/education studies | NR             | Coping after follow-up                                                                                                                                       | NR    |                      | Pooled effect size: 0.52 [95% CI -0.07 - 1.11, p=0.04]           |                                                                                                                                                                                                                                                                                                                                                                                                                                                                                                                                                                                                                                                                                                                                                                                        |                                                                                                                                                                                                                                                                                                                                                                                                                                                                                                                                        |               |          |

CI: confidence interval; DAS28: disease activity score assessing 28 joints; M: months; n: number of patients; NA: not applicable; NR: not reported; (N)-RCT: (non-)randomised controlled trial; OR: odds ratio; RA: rheumatoid arthritis; SD: standard deviation; SLR: systematic literature review; W: weeks; Y: years; A: abstract/letter; #: number of studies. 1. Composite scores: Change over time, otherwise fixed time point, otherwise LDA, otherwise remission; 2. Latest time point during treatment period that was reported; 3. According to Cochrane Collaboration's tool for individual studies; highest risk of bias as found; According to AMSTAR2 tool for SLRs: Low=zero or one non-critical weakness; Moderate=more than one non-critical weakness; High=one critical flaw with or without non-critical weaknesses; Critically high=more than one critical flaw with or without non-critical weaknesses; 4. Only applicable for SLRs: Summary of RoB of individual studies, as assessed in SLR
