# Supplementary material for: Pharmacological and non-pharmacological therapeutic strategies in difficult-to-treat rheumatoid arthritis: a systematic literature review informing the EULAR recommendations for the management of difficult-to-treat rheumatoid arthritis
Source: HighWire-hosted journal article supplement (doi:10.1136/rmdopen-2020-001512), 2021-01-01
Supplement: rmdopen-2020-001512supp008_data_supplement.pdf [file rmdopen-2020-001512supp008_data_supplement.pdf]

# Pharmacological and non-pharmacological therapeutic strategies in difficult-to-treat rheumatoid arthritis: a systematic literature review informing the EULAR recommendations for the management of difficult-to-treat rheumatoid arthritis

## SUPPLEMENTARY

Supplementary file

### 1. Pharmacological and non-pharmacological therapeutic strategies for difficult-to-treat RA patients

#### 1a. Therapeutic strategies in patients with limited DMARD options

##### Clinical question

- What are the management options when drug choices are limited to treat persistent inflammation in D2T RA?
- What are the management options for patients with comorbidities?

##### Epidemiological question

What are effective management options when DMARD choices are limited, because of adverse events, comorbidity or contraindications, to treat persistent inflammation in D2T RA?

- P: D2T RA patients with inflammatory activity and limited DMARD options
- I: Management options (including non-pharmacological therapy)
- C: No or different management options
- O: Efficacy and/or safety/tolerability

#### 1b. Therapeutic strategies in patients who failed $\geq 1$ b/tsDMARD

##### Clinical question

What are the management options for refractory RA?

##### Epidemiological question

What are effective management options for true refractory RA?

- P: D2T RA with inflammation not explained by other causes (true refractory RA)

- I: Management options (including non-pharmacological therapy)
- C: No or different management options
- O: Reduction of RA inflammation

### 1c. Therapeutic strategies in patients with predominantly non-inflammatory complaints

#### Clinical question

- What are the management options for D2TRA patients that primarily have non-inflammatory complaints (e.g. fatigue, pain, reduced quality of life and physical functioning)?

#### Epidemiological question

What are effective management options for RA patients with persistent complaints that are not explained by active inflammation?

- P: D2T RA patients with persistent complaints not explained by active inflammation
- I: Management options (including non-pharmacological therapy)
- C: No or different management options
- O: Reduction in (specific) complaints

#### Search in short

Rheumatoid arthritis AND Terms for difficult-to-treat RA, terms for fatigue, and terms for adverse events, and comorbidities that may limit DMARD choices AND General terms for treatment, and specific DMARDs, GCs, NSAIDs, non-pharmacological treatment options AND General terms for efficacy and tolerability, and often used outcome measures AND Adjusted Pubmed therapeutic query (to focus more generally on comparative studies not only RCTs)

#### Search in full

PubMed: (RA[Title/Abstract] OR Rheumatoid arthritis[Title/Abstract] OR "arthritis, rheumatoid"[MeSH]) AND (Established[Title/Abstract] OR Previously treated[Title/Abstract] OR Failed[Title/Abstract] OR Failure[Title/Abstract] OR Refractoriness[Title/Abstract] OR Refractory[Title/Abstract] OR Difficult to treat[Title/Abstract] OR Irresponsive[Title/Abstract] OR Irresponsiveness[Title/Abstract] OR Resistant[Title/Abstract] OR Resistance[Title/Abstract] OR Unsuccessful[Title/Abstract] OR Comorbidity[Title/Abstract] OR Comorbidity[Mesh] OR Comorbidities[Title/Abstract] OR Co-morbidity[Title/Abstract] OR Co-morbidities[Title/Abstract] OR Multi-morbidity[Title/Abstract] OR Multi-morbidities[Title/Abstract] OR Multimorbidity[Title/Abstract] OR Multimorbidity[MeSH] OR Multimorbidities[Title/Abstract] OR Contraindicated[Title/Abstract] OR Contraindication[Title/Abstract] OR Contra-indication[Title/Abstract] OR Contra-indicated[Title/Abstract] OR Complication[Title/Abstract] OR Complications[Title/Abstract] OR Adverse event[Title/Abstract] OR Adverse events[Title/Abstract] OR Adverse reaction[Title/Abstract] OR Adverse reactions[Title/Abstract] OR Adverse effect[Title/Abstract] OR Adverse effects[Title/Abstract] OR Side effect[Title/Abstract] OR Side effects[Title/Abstract] OR Adverse drug reaction[Title/Abstract] OR Adverse drug reactions[Title/Abstract] OR (Drug-Related Side Effects and Adverse Reactions [Mesh]) OR

Infection[Title/Abstract] OR Infections[Title/Abstract] OR Infection[MeSH] OR Hepatitis[Title/Abstract] OR Hepatitis[MeSH] OR HIV[Title/Abstract] OR Human Immunodeficiency Virus[Title/Abstract] OR HIV[Mesh] OR Tuberculosis[Mesh] OR TBC[Title/Abstract] OR Latent tuberculosis[Mesh] OR Malignancy[Title/Abstract] OR Malignancies[Title/Abstract] OR Neoplasms[MeSH] OR Tumor[Title/Abstract] OR Tumors[Title/Abstract] OR Cancer[Title/Abstract] OR Lung disease[Title/Abstract] OR Lung diseases[Title/Abstract] OR Lung diseases[MeSH] OR Asthma[Title/Abstract] OR Asthma[MeSH] OR COPD[Title/Abstract] OR Pulmonary Disease, Chronic Obstructive[MeSH] OR Chronic obstructive pulmonary disease[Title/Abstract] OR Chronic bronchitis[Title/Abstract] OR Bronchitis, chronic[Title/Abstract] OR Pulmonary fibrosis[Title/Abstract] OR Pulmonary fibrosis[MeSH] OR interstitial lung disease[Title/Abstract] OR Interstitial lung diseases[Title/Abstract] OR Lung diseases, interstitial[MeSH] OR Cardiovascular disease[Title/Abstract] OR CV disease[Title/Abstract] OR CVD[Title/Abstract] OR Cardiovascular disease[MeSH] OR Hypertension[Title/Abstract] OR Hypertension[MeSH] OR High blood pressure[Title/Abstract] OR Hyperlipidemia[Title/Abstract] OR Hyperlipidaemia[Title/Abstract] OR Hyperlipidemias[MeSH] OR Cardiac failure[Title/Abstract] OR Cardiomyopathy[Title/Abstract] OR Cardiomyopathies[MeSH] OR Kidney disease[Title/Abstract] OR Kidney diseases[Title/Abstract] OR Kidney diseases[MeSH] OR Renal disease[Title/Abstract] OR Renal diseases[Title/Abstract] OR Kidney failure[Title/Abstract] OR Kidney failures[Title/Abstract] OR Renal failure[Title/Abstract] OR Renal failures[Title/Abstract] OR Renal dysfunction[Title/Abstract] OR Renal dysfunctions[Title/Abstract] OR Kidney dysfunction[Title/Abstract] OR Kidney dysfunctions[Title/Abstract] OR Renal insufficiency[Title/Abstract] OR Kidney insufficiency[Title/Abstract] OR Liver disease[Mesh] OR Liver failure[Title/Abstract] OR Liver dysfunction[Title/Abstract] OR Liver dysfunctions[Title/Abstract] OR Liver insufficiency[Title/Abstract] OR Liver disease[Title/Abstract] OR Liver diseases[Title/Abstract] OR Liver cirrhosis[Title/Abstract] OR Liver enzyme elevation[Title/Abstract] OR ALAT[Title/Abstract] OR ALT[Title/Abstract] OR Aspartate transaminase[Title/Abstract] OR Aspartate aminotransferase[Title/Abstract] OR Aspartate aminotransferases[Mesh] OR serum glutamic oxaloacetic transaminase[Title/Abstract] OR SGOT[Title/Abstract] OR ASAT[Title/Abstract] OR AST[Title/Abstract] OR Alanine transaminase[Title/Abstract] OR "Alanine Transaminase"[Mesh] OR Osteoporosis[Title/Abstract] OR Osteoporosis[MeSH] OR Osteoporosis, Postmenopausal[MeSH] OR Osteopenia[Title/Abstract] OR Diabetes mellitus[Title/Abstract] OR Diabetes mellitus[MeSH] OR DM[Title/Abstract] OR Pregnancy[Title/Abstract] OR Pregnancy[MeSH] OR Ulcus ventriculi[Title/Abstract] OR Ulcus duodeni[Title/Abstract] OR Stomach ulcer[MeSH] OR Fatigue[Title/Abstract] OR Fatigue[MeSH] OR Fatigue Syndrome, Chronic[Title/Abstract] OR Fatigue Syndrome, Chronic[MeSH] OR Thrombosis[Title/Abstract] OR Thrombosis[MeSH] OR Thrombophilia[Title/Abstract] OR Thrombophilia[MeSH]) **AND** (Switching[Title/Abstract] OR DMARD[Title/Abstract] OR DMARDs[Title/Abstract] OR "disease modifying antirheumatic drug"[Title/Abstract] OR "disease modifying antirheumatic drugs"[Title/Abstract] OR "disease modifying anti-rheumatic drug"[Title/Abstract] OR "disease modifying anti-rheumatic drugs"[Title/Abstract] OR "Antirheumatic Agents"[Mesh] OR Glucocorticoids[Title/Abstract] OR "glucocorticoids"[MeSH Terms] OR corticosteroid[Title/Abstract] OR corticosteroids[Title/Abstract] OR NSAID[Title/Abstract] OR NSAIDs[Title/Abstract] OR "anti-inflammatory agents, non-steroidal"[MeSH Terms] OR Non-

Steroidal Anti-Inflammatory Agents[Title/Abstract] OR Non Steroidal Anti Inflammatory Agents[Title/Abstract] OR Nonsteroidal Anti-Inflammatory Agents[Title/Abstract] OR Nonsteroidal Anti Inflammatory agents[Title/Abstract] OR Nonsteroidal Antiinflammatory Agents[Title/Abstract] OR Antiinflammatory Agents, Non Steroidal[Title/Abstract] OR Anti Inflammatory Agents, Nonsteroidal[Title/Abstract] OR Antiinflammatory Agents, Nonsteroidal[Title/Abstract] OR Anti-Inflammatory Analgetics[Title/Abstract] OR Analgetics, Anti-Inflammatory[Title/Abstract] OR "cyclooxygenase inhibitors"[MeSH Terms] OR "cyclooxygenase 2 inhibitors"[MeSH Terms] OR Physical therapy[Title/Abstract] OR Physiotherapy[Title/Abstract] OR Cognitive behavioral therapy[Title/Abstract] OR "Balneology/therapeutic use"[Mesh] OR "Balneology/therapy"[Mesh] OR Balneotherapy[Title/Abstract] OR Non-pharmacological[Title/Abstract] OR "Massage/therapy"[Mesh] OR "Massage/therapeutic use"[Mesh] OR Reflexology[Title/Abstract] OR "Complementary therapies"[Mesh] OR Methotrexate[tiab] OR MTX[tiab] OR "Methotrexate"[Mesh] OR Leflunomide[tiab] OR "leflunomide"[Supplementary Concept] OR Sulfasalazine[tiab] OR "Sulfasalazine"[Mesh] OR Salazosulfapyridine[tiab] OR Hydroxychloroquine[tiab] OR Chloroquine[tiab] OR "Chloroquine"[Mesh] OR Isoxazole[tiab] OR "Isoxazoles"[Mesh] OR Gold[tiab] OR "Gold"[Mesh] OR "Gold compounds"[Mesh] OR Azathioprine[tiab] OR "Azathioprine"[Mesh] OR Cyclosporine[tiab] OR "Cyclosporine"[Mesh] OR Penicillamine[tiab] OR "Penicillamine"[Mesh] OR Cyclophosphamide[tiab] OR "Cyclophosphamide"[Mesh] OR "Mycophenolic acid"[tiab] OR "Mycophenolic acid"[Mesh] OR Pyrroles[tiab] OR "Pyrroles"[Mesh] OR Chlorambucil[tiab] OR "Chlorambucil"[Mesh] OR Mycophenolate[tiab] OR "Mycophenolic acid"[Mesh] OR Minocycline[tiab] OR "Minocycline"[Mesh] OR Tofacitinib[tiab] OR "tofacitinib"[Supplementary Concept] OR Baricitinib[tiab] OR "baricitinib"[Supplementary Concept] OR Filgotinib[tiab] OR "GLPG0634"[Supplementary Concept] OR Peficitinib[tiab] OR "peficitinib"[Supplementary Concept] OR Decernotinib[tiab] OR "2-((2-(1H-pyrrolo(2,3-b)pyridin-3-yl)pyrimidin-4-yl)amino)-2-methyl-N-(2,2,2-trifluoroethyl)butanamide"[Supplementary Concept] OR Ruxolitinib[tiab] OR "INCB018424"[Supplementary Concept] OR Upadacitinib[tiab] OR "Biological Products"[Mesh] OR Infliximab[tiab] OR "Infliximab"[Mesh] OR Golimumab[tiab] OR Adalimumab[tiab] OR "Adalimumab"[Mesh] OR Certolizumab[tiab] OR "Certolizumab Pegol"[Mesh] OR Etanercept[tiab] OR "Etanercept"[Mesh] OR Abatacept[tiab] OR "Abatacept"[Mesh] OR Tocilizumab[tiab] OR "tocilizumab"[Supplementary Concept] OR Anakinra[tiab] OR "Interleukin 1 Receptor Antagonist Protein"[Mesh] OR Rituximab[tiab] OR "Rituximab"[Mesh] OR Secukinumab[tiab] OR Secukinumab[Supplementary Concept] OR Dexamethasone[Title/Abstract] OR "dexamethasone"[MeSH Terms] OR Betamethasone[Title/Abstract] OR "betamethasone"[MeSH Terms] OR Methylprednisolone[Title/Abstract] OR "methylprednisolone"[MeSH Terms] OR Prednisolone[Title/Abstract] OR "prednisolone"[MeSH Terms] OR Prednisone[Title/Abstract] OR "prednisone"[MeSH Terms] OR Triamcinolone[Title/Abstract] OR "triamcinolone"[MeSH Terms] OR Triamcinolone acetonide[Title/Abstract] OR "triamcinolone acetonide"[MeSH Terms] OR Celecoxib[Title/Abstract] OR "celecoxib"[MeSH Terms] OR Diclofenac[Title/Abstract] OR "diclofenac"[MeSH Terms] OR Etodolac[Title/Abstract] OR "etodolac"[MeSH Terms] OR etoricoxib[Title/Abstract] OR Ibuprofen[Title/Abstract] OR "ibuprofen"[MeSH Terms] OR Ketoprofen[Title/Abstract] OR "ketoprofen"[MeSH Terms] OR Meclofenamic Acid[Title/Abstract] OR "meclofenamic acid"[MeSH Terms] OR meloxicam[Title/Abstract] OR

Naproxen[Title/Abstract] OR "naproxen"[MeSH Terms] OR Niflumic Acid[Title/Abstract] OR "niflumic acid"[MeSH Terms] OR Piroxicam[Title/Abstract] OR "piroxicam"[MeSH Terms] OR Plasmapheresis[Title/Abstract] OR Plasmapheresis[MeSH] OR Intravenous immunoglobulin[Title/Abstract] OR Immunoglobulins, Intravenous[MeSH] OR Intravenous immunoglobulins[Title/Abstract] OR Intravenous Antibodies[Title/Abstract] OR IVIG[Title/Abstract] OR Ustekinumab[Title/Abstract] OR Ustekinumab[MeSH] OR brodalumab[Title/Abstract] OR brodalumab[Supplementary Concept] OR Pain management[MeSH] OR Pain management[Title/Abstract] **AND** (Disease activity[Title/Abstract] OR remission[Title/Abstract] OR Drug survival[Title/Abstract] OR Persistence[Title/Abstract] OR Therapeutic success[Title/Abstract] OR Response[Title/Abstract] OR Effectiveness[Title/Abstract] OR Efficacy[Title/Abstract] OR Effective[Title/Abstract] OR Toxic\*[Title/Abstract] OR Safety[Title/Abstract] OR Tolerability[Title/Abstract] OR Tolerable[Title/Abstract] OR Adverse event[Title/Abstract] OR Adverse events[Title/Abstract] OR Adverse effect[Title/Abstract] OR Adverse effects[Title/Abstract] OR Adverse reaction[Title/Abstract] OR Adverse reactions[Title/Abstract] OR Side-effect[Title/Abstract] OR Side-effects[Title/Abstract] OR Averse drug reaction[Title/Abstract] OR Adverse drug reactions[Title/Abstract] OR (Drug-Related Side Effects and Adverse Reactions [Mesh]) OR DAS28[Title/Abstract] OR DAS[Title/Abstract] OR DAS44[Title/Abstract] OR CDAI[Title/Abstract] OR SDAI[Title/Abstract] OR ACR20[Title/Abstract] OR ACR50[Title/Abstract] OR ACR70[Title/Abstract] OR ACR-20[Title/Abstract] OR ACR-50[Title/Abstract] OR ACR-70[Title/Abstract]) **AND** ("clinical studies as topic"[MeSH Terms] OR (clinical[Tiab] AND (trial[Tiab] OR trials[Tiab]))) OR (randomized[Tiab] AND (trial[Tiab] OR trials[Tiab]))) OR (randomised[Tiab] AND (trial[Tiab] OR trials[Tiab]))) OR "observational study"[Tiab] OR "non-interventional study"[Tiab] OR "observational studies"[Tiab] OR "non-interventional studies"[Tiab] OR "Clinical Study"[Publication Type] OR "Comparative study"[Publication Type] OR "Clinical Study"[Tiab] OR "Comparative study"[Tiab] OR "Clinical Studies"[Tiab] OR "Comparative studies"[Tiab])

Searches in Embase and Cochrane are available on request.

### Exclusion criteria

- Duplicate
- Language other than English
- Animal study
- Wrong publication type (e.g., Editorial, case report or case series, abstract not of ACR or EULAR of past 2 years, narrative review)
- 1a:
  - o No or less than 10% (or n <10) RA patients with contraindications because of comorbidities or adverse events
  - o No results presented for this (sub)group
  - o No quantitative results on efficacy or safety
- 1b:
  - o No RA patients with true refractory disease
  - o Not failed  $\geq 1$  b/tsDMARD
  - o Failing  $\geq 2$  b/tsDMARD not allowed according to inclusion criteria

- No quantitative results on efficacy
- No comparison between different strategies (doesn't need to be formal testing)
- 1c:
  - No RA patients with non-inflammatory complaints (e.g. pain, fatigue, reduced function, reduced quality of life) that cannot be explained by active inflammation
  - Not failed  $\geq 1$  DMARD
  - No quantitative results on efficacy
  - No comparison between different strategies

### **Predetermined items for data extraction**

- Study:
  - 1<sup>st</sup> Author
  - Title
  - Publication year
  - Publication type (original study/SLR/abstract)
  - Study design
  - General description of population
- Baseline characteristics:
  - Number of patients
  - Gender (female)
  - Age (years)
  - DAS28 (or another composite index)
  - RF positivity
  - ACPA positivity
  - Disease duration (days/months/years)
  - DMARD history
  - Current DMARD therapy
  - 1a: Contraindications (including comorbidities and previous adverse events, as detailed as possible)
  - 1c: Non-inflammatory complaints (as detailed as possible)
- Determinant:
  - Intervention:
    - Name/description
    - Number of patients
    - Dose
    - Administration route
    - Treatment strategy (step-up, treat-to-target, step-down, stable)
    - Duration of treatment (days/months/years)
  - Control:
    - Name/description
    - Number of patients
    - Dose

- Administration route
  - Treatment strategy (step-up, treat-to-target, step-down, stable)
  - Duration of treatment (days/months/years)
- Outcome:
  - Name/description of outcome
  - Number and percentage of responders (meeting the outcome) in intervention group
  - Number and percentage of responders (meeting the outcome) in control group
  - Association measure:
    - OR (95%CI, p-value)
    - Risk ratio (95%CI, p-value)
    - Risk difference (95%CI, p-value)
    - Hazard ratio (95%CI, p-value)
    - Mean outcome in intervention group (standard deviation)
    - Mean outcome in control group (standard deviation)
    - Mean difference (standard error, 95%CI)
    - Other
- Other remarks (e.g. funding, conflicts of interest, things that stand out)
- Additional items for SLRs:
  - Number of studies included in qualitative analysis
  - Number of studies included in quantitative analysis (meta-analysis)
  - Narrative summary of baseline characteristics
  - Narrative summary of results
  - Measure to assess risk of bias
  - Outcome of risk of bias (range)
  - Narrative summary of risk of bias
  - References of included studies

## **2. Identification and optimisation of suboptimal goal setting and suboptimal self-management**

### **2a. Identification of a mismatch in goal setting between patient and health care professional**

#### **Clinical question**

How to address a mismatch between management goals of patients and rheumatologists?

#### **Epidemiological question**

How to identify a mismatch between management goals of patients and health care professionals in difficult to treat RA patients?

- P: D2T RA patients where a mismatch between their management goals and the health care professional's management goals is suspected



- I: diagnostic/screening 'tests'/characteristics for mismatch of management goals
- C: Presence/level/absence of a mismatch of management goals according to a reference standard
- O: Diagnostic test value of the techniques to establish a mismatch of management goals

## **2b. Optimisation of a mismatch in goal setting between patient and health care professional**

### **Clinical question**

How to optimise the goal setting by the patient and rheumatologist?

### **Epidemiological question**

How to optimise shared goal setting by the difficult to treat RA patient and health care professional?

- P: D2T RA patients with a mismatch between management goal of patient and health care professional
- I: Interventions to optimize goals setting by patient and health care professional
- C: No or another intervention
- O: Reduction of complaints

## **2c. Identification of suboptimal self-management**

### **Clinical question**

How to detect suboptimal self-management?

### **Epidemiological question**

How to detect suboptimal self-management in difficult to treat RA patients?

- P: D2T RA patients who are suspected of suboptimal self-management
- I: diagnostic/screening 'tests'/characteristics for self-management
- C: Presence/level/absence of (adequate) self-management according to a reference standard
- O: Diagnostic test value of the techniques to establish (adequate) self-management

## **2d. Optimisation of suboptimal self-management**

### **Clinical question**

How to improve self-management to improve complaints?

### **Epidemiological question**

How to improve self-management in difficult to treat RA patients to improve complaints?

- P: D2T RA patient with suboptimal self-management



- I: Interventions to improve self-management
- C: No or another intervention
- O: Reduction of complaints

### Search in short

Rheumatoid arthritis AND Terms for management goals and self-management

### Search in full

PubMed: (RA[Title/Abstract] OR Rheumatoid arthritis[Title/Abstract] OR "arthritis, rheumatoid"[MeSH Terms]) **AND** (Setting goal[Title/Abstract] OR Setting goals[Title/Abstract] OR Goal-setting[Title/Abstract] OR Goal-settings[Title/Abstract] OR Self care[Title/Abstract] OR Self cares[Title/Abstract] OR Self management[Title/Abstract] OR Management goal[Title/Abstract] OR Management goals[Title/Abstract] OR Treatment goal[Title/Abstract] OR Treatment goals[Title/Abstract] OR Self efficacy[Title/Abstract] OR Self efficacy[Mesh])  
Searches in Embase and Cochrane are available on request.

### Exclusion criteria

- Duplicate
- Language other than English
- Animal study
- Wrong publication type (e.g., Editorial, case report or case series, abstract not of ACR or EULAR of past 2 years, narrative review)
- No RA patients
- 2a:
  - o No diagnostic test for detection of a mismatch in goal setting between patient and health care professional (diagnostic test can also be screening test or patient characteristic; it can also be i.e. a rating of importance of 'goals' for patients/ doctors)
  - o No information on outcomes of diagnostic characteristic/test (at least a comparison of the importance/frequency of 'goals' between patients and health care providers needs to be given; qualitative outcomes, e.g. interviews, are also of interest)
- 2b:
  - o No interventions to optimise goal setting
  - o No comparison between different strategies (doesn't need to be formal testing: pre- vs post-intervention also of interest)
  - o No quantitative results on efficacy
- 2c:
  - o No diagnostic test for self-management (diagnostic test can also be screening test or patient characteristic; it can also be i.e. a rating of importance of 'self-management items/goals/domains' for patients/controls)

- No information on outcomes of diagnostic characteristic/test (at least a comparison of the 'self-management items/scores' with a control population (or "norm scores") should be given; qualitative outcomes, e.g. interviews, are also of interest)
- 2d:
  - No interventions to optimise self-management
  - No comparison between different strategies (doesn't need to be formal testing: pre- vs post-intervention also of interest)
  - No quantitative results on efficacy

### **Predetermined items for data extraction**

- Study:
  - 1<sup>st</sup> Author
  - Title
  - Publication year
  - Publication type (original study/SLR/abstract)
  - Country where study was performed
  - Setting (general practitioner/secondary care/tertiary care)
  - Study design
  - General description of population
- Baseline characteristics:
  - Number of patients
  - Gender (female)
  - Age (years)
  - DAS28 (or another composite index)
  - RF positivity
  - ACPA positivity
  - Disease duration (days/months/years)
  - DMARD history
  - Current DMARD therapy
  - 2a/2b: Definition/description of mismatch in goal setting
  - 2c/2d: Definition/description of suboptimal self-management
- Determinant:
  - 2a/2c:
    - Diagnostic test:
      - Name/description
      - Cut-off (if applicable)
    - Reference standard:
      - Name/description
      - Cut-off (if applicable)
    - Time interval between diagnostic test and reference standard
  - 2b/2d:
    - Intervention:

- Name/description
    - Number of patients
    - Duration of treatment (days/months/years)
  - Control:
    - Name/description
    - Number of patients
    - Duration of treatment (days/months/years)
- Outcome:
  - 2a/2c:
    - Diagnostic test value to establish presence/level of mismatch in goal setting or suboptimal goal setting, respectively:
      - Diagnostic OR (95%CI, p-value)
      - AUC-ROC (95%CI, p-value)
      - PPV (95%CI)
      - NPV (95%CI)
      - Sensitivity (95%CI)
      - Specificity (95%CI)
      - LR+ (95%CI)
      - LR- (95%CI)
      - Correlation coefficient (95%CI, p-value)
      - Other
    - Comparison in frequency/importance of management goals or self-management items, respectively, between patients and health care professionals:
      - Description of comparison
      - Frequency in patients
      - Frequency in health care professionals
    - Calculable test value:
      - 2a:
        - Number of RA patients with mismatch in goal setting and with positive test
        - Number of RA patients with mismatch in goal setting and with negative test
        - Number of RA patients without mismatch in goal setting and with positive test
        - Number of RA patients without mismatch in goal setting and with negative test
      - 2c:
        - Number of RA patients with optimal self-management and with positive test
        - Number of RA patients with optimal self-management and with negative test

- Number of RA patients with suboptimal self-management with positive test
    - Number of RA patients with suboptimal self-management with negative test
  - 2b/2d:
    - Name/description of outcome
    - Number and percentage of responders (meeting the outcome) in intervention group
    - Number and percentage of responders (meeting the outcome) in control group
    - Association measure:
      - OR (95%CI, p-value)
      - Risk ratio (95%CI, p-value)
      - Risk difference (95%CI, p-value)
      - Hazard ratio (95%CI, p-value)
      - Mean outcome in intervention group (standard deviation)
      - Mean outcome in control group (standard deviation)
      - Mean difference (standard error, 95%CI)
      - Other
- Other remarks (e.g. funding, conflicts of interest, things that stand out)
- Additional items for SLRs:
  - Number of studies included in qualitative analysis
  - Number of studies included in quantitative analysis (meta-analysis)
  - Narrative summary of baseline characteristics
  - Narrative summary of results
  - Measure to assess risk of bias
  - Outcome of risk of bias (range)
  - Narrative summary of risk of bias
  - References of included studies
